# Supplementary material
Source: publisher site journal article supplement (https://www.dovepress.com/get_supplementary_file.php?f=259894.xlsx)
Supplement: Supplementary file 1 [file get_supplementary_file.php]

## Sheet: S1 file
Supplementary file 1_proteins
Accession	Gene Name	Description	Coverage	# Peptides	# PSMs	# Unique Peptides	# AAs	MW [kDa]	calc. pI	Abundances A1	Abundances A2	Abundances A3	Abundances B1	Abundances B2	Abundances B3
A0A0J4Y0Q0	groL	60 kDa chaperonin OS=Klebsiella pneumoniae GN=groL PE=3 SV=1	87.2263	44	1079	4	548	57.09	4.94	104.1	104.8	105	94.4	97.6	94.1
D6QLZ1	ompK36	OmpK36 OS=Klebsiella pneumoniae GN=ompK36 PE=3 SV=1	92.7027	30	1107	2	370	40.639	4.87	64.2	58	56.2	137.9	147.4	136.3
A0A2D1IUK7	CR230_00565	Porin OmpC OS=Klebsiella pneumoniae GN=CR230_00565 PE=4 SV=1	81.9672	28	1113	2	366	40.179	4.84	140.9	146.2	145.7	51	62.9	53.2
A0A1V6WES4	B8011_02615	Elongation factor Tu (Fragment) OS=Klebsiella pneumoniae GN=B8011_02615 PE=4 SV=1	91.5663	25	814	2	332	36.779	4.97	100.1	97.2	98.1	98.7	108.7	97.2
J9R3Z4	ompk36	Ompk36 OS=Klebsiella pneumoniae GN=ompk36 PE=3 SV=1	84.4687	23	988	1	367	40.04	4.86	15.5	23	25.5	172	182.2	181.9
E5G6G0	ompK36	Outer membrane porin OS=Klebsiella pneumoniae GN=ompK36 PE=3 SV=1	77.135	22	933	1	363	39.655	4.77	106	113.7	110.7	88.6	94	87.2
A0A024FSK4	ompK36	OmpK36 porin (Fragment) OS=Klebsiella pneumoniae GN=ompK36 PE=4 SV=1	87.9154	22	838	2	331	35.954	4.94	47.6	43.6	48.1	144.1	166.4	150.4
R4YB96	ompA	OmpA protein OS=Klebsiella pneumoniae subsp. rhinoscleromatis SB3432 GN=ompA PE=3 SV=1	80.7388	24	987	10	379	40.736	6.4	97.5	95.9	96.6	104.6	100.9	104.4
W8VHB2	KPNJ2_03316	Glyceraldehyde-3-phosphate dehydrogenase OS=Klebsiella pneumoniae 30684/NJST258_2 GN=KPNJ2_03316 PE=3 SV=1	90.1198	38	647	4	334	35.872	6.8	101.8	104.2	105.3	96.2	91.1	101.3
Q6WA95	groEL	60 kDa chaperonin (Fragment) OS=Klebsiella pneumoniae GN=groEL PE=3 SV=1	91.3613	37	677	1	382	40.058	4.81	127.3	98.3	105.8	94.9	97.8	75.9
B9VMB3	ompK36	OmpK36 porin (Fragment) OS=Klebsiella pneumoniae GN=ompK36 PE=3 SV=1	85.6749	26	779	11	363	39.854	4.88	66.7	64.1	65.1	137	133.3	133.8
A0A0E1CEC0	KPNJ1_02625	Alcohol dehydrogenase OS=Klebsiella pneumoniae 30660/NJST258_1 GN=KPNJ1_02625 PE=3 SV=1	79.7619	21	552	1	336	35.268	6.18	87.5	88.3	89.4	111	112.1	111.7
A0A060VEA4	eno	Enolase OS=Klebsiella pneumoniae GN=eno PE=3 SV=1	81.8792	32	651	32	447	47.309	5.2	97.8	100.2	101.1	102	95.4	103.5
C8T548	pgk	Phosphoglycerate kinase OS=Klebsiella pneumoniae subsp. rhinoscleromatis ATCC 13884 GN=pgk PE=3 SV=1	91.2145	30	561	11	387	41.108	5.22	104.2	107.3	108.3	94.7	92.7	92.7
A0A2G3RQG6	groL	Chaperonin GroEL OS=Klebsiella pneumoniae subsp. pneumoniae GN=groL PE=4 SV=1	64.781	30	676	6	548	57.208	4.97	116.8	112.4	107.3	89.5	79.6	94.4
A0A1C3Q7D6	adhP	Alcohol dehydrogenase OS=Klebsiella pneumoniae GN=adhP PE=3 SV=1	79.7619	21	446	1	336	35.266	6.35	111.8	100.7	95.6	88.1	97.4	106.4
A6T4F4	dnaK	Chaperone protein DnaK OS=Klebsiella pneumoniae subsp. pneumoniae (strain ATCC 700721 / MGH 78578) GN=dnaK PE=3 SV=1	84.6395	59	518	59	638	69.066	4.97	100.9	101.4	101.3	100.2	97	99.3
A0A1W1KLZ4	fusA_2	Elongation factor G OS=Klebsiella pneumoniae GN=fusA_2 PE=3 SV=1	76.5625	43	463	42	704	77.493	5.34	107.5	108.9	108.9	92.8	91	90.9
Q6WAM7	gapA	Glyceraldehyde phosphate dehydrogenase (Fragment) OS=Klebsiella pneumoniae GN=gapA PE=3 SV=1	84.8375	32	390	2	277	29.375	5.71	105.2	115.9	116.6	87.1	95.9	79.3
W1AXP6		Glyceraldehyde-3-phosphate dehydrogenase OS=Klebsiella pneumoniae IS22 PE=3 SV=1	67.0695	25	338	4	331	35.51	7.11	102.6	103.3	104.7	96.4	99.9	93.1
A0A0V9I722	atpA	ATP synthase subunit alpha OS=Klebsiella pneumoniae GN=atpA PE=3 SV=1	76.2183	36	366	10	513	55.135	6	99.6	99	99.3	103.1	101.1	98
A0A0H3GPZ9	rpoB	DNA-directed RNA polymerase subunit beta OS=Klebsiella pneumoniae subsp. pneumoniae (strain HS11286) GN=rpoB PE=3 SV=1	78.8376	95	496	11	1342	150.421	5.31	104.9	107.5	110	93.5	93	91.1
A0A1W1KS31	tuf1_1	Translation elongation factor Tu OS=Klebsiella pneumoniae GN=tuf1_1 PE=4 SV=1	88.8514	23	465	1	296	32.581	4.94	92.6	88.5	86.9	99	133.8	99.3
A0A1Y0Q5T0	rpoC	DNA-directed RNA polymerase subunit beta' OS=Klebsiella pneumoniae subsp. pneumoniae GN=rpoC PE=3 SV=1	72.85	92	422	9	1407	155.165	6.87	110.6	110.5	110.4	91.7	90.9	85.8
R4Y5F9	aceE	Pyruvate dehydrogenase E1 component OS=Klebsiella pneumoniae subsp. rhinoscleromatis SB3432 GN=aceE PE=4 SV=1	75.4228	72	524	2	887	99.398	5.6	108.7	114.5	113	90.4	88.1	85.3
A0A2G3RXD6	rpoB	DNA-directed RNA polymerase subunit beta OS=Klebsiella pneumoniae subsp. pneumoniae GN=rpoB PE=4 SV=1	72.0566	85	430	1	1342	150.405	5.27	117	110.1	109	101.5	91.7	70.8
A0A181YC87	aceE	Pyruvate dehydrogenase E1 component OS=Klebsiella pneumoniae GN=aceE PE=4 SV=1	75.31	71	517	1	887	99.386	5.64	45	41.9	43.5	151.6	153.8	164.3
W9BA54	adhE	Aldehyde-alcohol dehydrogenase OS=Klebsiella pneumoniae GN=adhE PE=3 SV=1	80.8081	57	387	3	891	95.825	6.79	129.4	139.5	139	89.9	53.8	48.3
A0A170BWP0	adhE_1	Aldehyde-alcohol dehydrogenase OS=Klebsiella pneumoniae GN=adhE_1 PE=3 SV=1	80.8081	57	406	3	891	95.833	6.89	105.5	105.1	105.8	98.2	94.5	91
A0A0H3GVY8	KPHS_21360	Catalase OS=Klebsiella pneumoniae subsp. pneumoniae (strain HS11286) GN=KPHS_21360 PE=3 SV=1	78.1915	49	421	2	752	83.419	5.66	95.7	100.7	102	104.6	97.2	99.7
A0A1B2ZMP7	BCB67_19110	Catalase OS=Klebsiella pneumoniae GN=BCB67_19110 PE=3 SV=1	78.1915	50	414	4	752	83.449	5.66	129.6	134.1	135.9	66.7	69.2	64.5
B5XYF4	rpoC	DNA-directed RNA polymerase subunit beta' OS=Klebsiella pneumoniae (strain 342) GN=rpoC PE=3 SV=1	63.3973	82	368	1	1407	155.332	6.8	120.7	97.9	85.1	96.2	112.8	87.2
C8SYF0	fbaB	Deoxyribose-phosphate aldolase OS=Klebsiella pneumoniae subsp. rhinoscleromatis ATCC 13884 GN=fbaB PE=4 SV=1	76.8571	26	488	13	350	37.882	6.65	99.3	101.2	101.8	100.2	97	100.5
A0A1Y0Q2E3	AN663_20805	30S ribosomal protein S1 OS=Klebsiella pneumoniae subsp. pneumoniae GN=AN663_20805 PE=3 SV=1	73.6086	52	406	52	557	61.14	4.98	98.3	99.3	100.1	102.8	99.6	100
R4Y7Q8	ptsI	Phosphoenolpyruvate-protein phosphotransferase OS=Klebsiella pneumoniae subsp. rhinoscleromatis SB3432 GN=ptsI PE=3 SV=1	77.5652	43	312	2	575	63.175	4.82	103.6	114.3	113.3	95.2	85.1	88.5
A0A2D2EEL7	CTI52_07525	Phosphoenolpyruvate-protein phosphotransferase PtsI OS=Klebsiella pneumoniae GN=CTI52_07525 PE=4 SV=1	77.5652	43	310	2	575	63.242	4.84	159.2	171.8	170.2	28.5	35.7	34.6
A0A1W1KRZ6	atpD	ATP synthase subunit beta OS=Klebsiella pneumoniae GN=atpD PE=3 SV=1	88.6957	32	363	13	460	50.195	5	96.1	96.7	97.4	104.4	100.7	104.7
A0A0H3GRP5	KPHS_21790	Aconitate hydratase OS=Klebsiella pneumoniae subsp. pneumoniae (strain HS11286) GN=KPHS_21790 PE=3 SV=1	68.764	62	389	1	890	97.489	5.44	173.4	180.9	181.3	19.7	23.7	21
W1ANR8	atpA	ATP synthase subunit alpha OS=Klebsiella pneumoniae IS22 GN=atpA PE=3 SV=1	59.2593	27	273	1	513	55.188	6.13	115.6	97.6	89.1	90.2	106.5	101
D1MWP2	tuf	Elongation factor Tu (Fragment) OS=Klebsiella pneumoniae GN=tuf PE=4 SV=1	79.7665	20	381	1	257	28.757	5.05	87.6	92	93.7	106.2	108.8	111.8
A0A060VLI1	acnA	Aconitate hydratase OS=Klebsiella pneumoniae GN=acnA PE=3 SV=1	69.1011	62	390	1	890	97.442	5.44	86.3	83.7	81.9	116.1	117.3	114.7
A0A1Y0PZ95	B5K12_24130	Aconitate hydratase OS=Klebsiella pneumoniae subsp. pneumoniae GN=B5K12_24130 PE=3 SV=1	68.764	62	387	1	890	97.447	5.44	143.9	161.1	161.2	43.8	46.6	43.5
A0A181RH77	acnA	Aconitate hydratase OS=Klebsiella pneumoniae GN=acnA PE=3 SV=1	68.764	62	385	2	890	97.475	5.44	46.1	44.3	44.6	150.2	175	139.8
A0A2G4YL51	CQB04_03770	Succinate-semialdehyde dehydrogenase OS=Klebsiella pneumoniae GN=CQB04_03770 PE=4 SV=1	77.6316	29	334	4	456	49.594	6.18	120.7	127.1	126.2	79.5	70.1	76.3
A0A181TUQ9	sad_2	Succinate-semialdehyde dehydrogenase OS=Klebsiella pneumoniae GN=sad_2 PE=3 SV=1	78.9474	30	321	5	456	49.522	6.02	54	51	52.4	152.4	132.8	157.4
A0A0E1C8C6	mdh	Malate dehydrogenase OS=Klebsiella pneumoniae 30660/NJST258_1 GN=mdh PE=3 SV=1	84.6154	22	261	8	312	32.406	5.74	92.2	90.2	91	110	101.1	115.5
Q6U643	terE	Chemical-damaging agent resistance protein C OS=Klebsiella pneumoniae GN=terE PE=4 SV=1	92.1466	13	264	10	191	20.372	5.01	112.8	113	112.1	86.9	87.4	87.8
A0A0E1CJ14	KPNJ1_02757	Peptidoglycan binding protein (LysM domain) OS=Klebsiella pneumoniae 30660/NJST258_1 GN=KPNJ1_02757 PE=4 SV=1	89.9329	14	311	1	149	15.899	5.38	89	92.2	94.7	112.1	104.2	107.9
B5XZD5	sdhA	Succinate dehydrogenase flavoprotein subunit OS=Klebsiella pneumoniae (strain 342) GN=sdhA PE=3 SV=1	74.8299	32	330	2	588	64.465	6.23	104.9	102.2	104	93.2	99.8	95.9
A0A060VFH6	sdhA	Succinate dehydrogenase flavoprotein subunit OS=Klebsiella pneumoniae GN=sdhA PE=3 SV=1	75.8446	34	326	4	592	64.855	6.3	106.5	110.5	109.1	89.3	99.8	84.8
A0A2G8ANI9	C630_05875	Transcriptional regulator OS=Klebsiella pneumoniae subsp. pneumoniae KpO3210 GN=C630_05875 PE=4 SV=1	69.6429	8	295	8	112	12.27	8.29	102.3	101.3	101.5	97.8	93	103.9
A0A2D2PKY7	putA	Trifunctional transcriptional regulator/proline dehydrogenase/L-glutamate gamma-semialdehyde dehydrogenase OS=Klebsiella pneumoniae GN=putA PE=4 SV=1	57.0455	62	261	2	1320	144.439	5.82	85.8	87.8	86.7	112.7	112.8	114.1
A0A1Y0Q097	dps	DNA protection during starvation protein OS=Klebsiella pneumoniae subsp. pneumoniae GN=dps PE=3 SV=1	92.2156	20	315	20	167	18.697	6.04	101.1	98.5	98.6	99.8	94.6	107.4
A0A098C9E7	putA	Bifunctional protein PutA OS=Klebsiella pneumoniae GN=putA PE=3 SV=1	57.0455	62	250	2	1320	144.474	5.77	114.7	123	127.2	76.3	83.6	75.2
A0A2D2PIQ2	CR231_02485	Succinate-semialdehyde dehydrogenase I OS=Klebsiella pneumoniae GN=CR231_02485 PE=4 SV=1	85.2697	36	295	2	482	51.68	5.41	63.3	60.8	61.1	143.5	134.1	137.2
A0A1S9BPB3	BU230_02865	Aconitate hydratase OS=Klebsiella pneumoniae GN=BU230_02865 PE=3 SV=1	53.5955	48	295	3	890	97.458	5.58	93.3	98.2	99.1	104.9	102.8	101.8
A0A1Y0Q262	tsf	Elongation factor Ts OS=Klebsiella pneumoniae subsp. pneumoniae GN=tsf PE=3 SV=1	85.159	26	280	26	283	30.431	5.21	96.4	97.9	97.5	104.8	99.6	103.9
W1DXB0		Pyruvate formate-lyase OS=Klebsiella pneumoniae IS46 PE=4 SV=1	81.9737	52	317	22	760	85.078	5.92	88.2	87.3	87.6	114.4	109.6	112.8
W1B5J8	pgk	Phosphoglycerate kinase OS=Klebsiella pneumoniae IS22 GN=pgk PE=3 SV=1	58.9147	20	268	1	387	41.093	5.22	118.2	90.9	96.2	96.8	112	85.8
C8T1F0	sucA	Oxoglutarate dehydrogenase (Succinyl-transferring), E1 component OS=Klebsiella pneumoniae subsp. rhinoscleromatis ATCC 13884 GN=sucA PE=4 SV=1	69.9465	51	372	1	935	105.051	6.58	116.5	103.4	108.4	83.4	108.8	79.5
A0A2D1HNB7	AN663_21890	2-oxoglutarate dehydrogenase E1 component OS=Klebsiella pneumoniae subsp. pneumoniae GN=AN663_21890 PE=4 SV=1	69.9465	51	371	1	935	105.105	6.58	83.6	76.2	73.9	120.3	122.8	123.2
A0A1V0C2H2	AM447_04305	Glutamate/aspartate ABC transporter substrate-binding protein OS=Klebsiella pneumoniae GN=AM447_04305 PE=4 SV=1	73.9274	23	278	4	303	33.447	8.73	114.6	115.1	115.7	84.1	84.3	86.1
A0A1W1KT27	gabD_1	Succinate-semialdehyde dehydrogenase OS=Klebsiella pneumoniae GN=gabD_1 PE=3 SV=1	81.1203	36	285	1	482	51.708	5.5	96.3	81.2	93.3	95.3	116.5	117.4
A0A1W1K8E3	pykF	Pyruvate kinase OS=Klebsiella pneumoniae GN=pykF PE=3 SV=1	74.6809	35	230	20	470	50.645	5.86	103.5	106.4	106.2	95.9	94.2	93.8
A0A0J4XZ67	SM87_01685	Outer membrane protein A OS=Klebsiella pneumoniae GN=SM87_01685 PE=3 SV=1	44.8571	15	419	2	350	37.444	6.25	99.5	101.1	103	102.7	90.6	103.1
A0A0H3GV85	KPHS_44200	Fructose-bisphosphate aldolase OS=Klebsiella pneumoniae subsp. pneumoniae (strain HS11286) GN=KPHS_44200 PE=3 SV=1	77.9944	21	319	10	359	39.134	6.07	101.7	106.7	106.8	96.1	90.7	98
W1H2Q5	rplA	50S ribosomal protein L1 OS=Klebsiella pneumoniae ISC21 GN=rplA PE=3 SV=1	79.4872	24	225	3	234	24.729	9.64	92.1	95.9	94.8	107.2	101.9	108.1
A0A168U0M5	gabD_2	Succinate-semialdehyde dehydrogenase OS=Klebsiella pneumoniae GN=gabD_2 PE=3 SV=1	85.2697	36	274	2	482	51.715	5.41	67.9	65.8	66.2	131.5	133.4	135.2
W1APN9		Phosphoenolpyruvate-protein phosphotransferase OS=Klebsiella pneumoniae IS22 PE=3 SV=1	59.4783	33	233	1	575	63.494	4.87	64	89.5	78.6	112.5	114.5	140.8
A0A1V0CAG5	AM447_19690	Cysteine synthase OS=Klebsiella pneumoniae GN=AM447_19690 PE=3 SV=1	86.0681	21	205	21	323	34.566	6.06	113.7	116.4	115.3	85.2	84.7	84.8
A0A1Y0Q072	AN663_14040	Phosphoenolpyruvate synthase OS=Klebsiella pneumoniae subsp. pneumoniae GN=AN663_14040 PE=3 SV=1	61.3636	41	272	1	792	87.005	5.01	120.2	128.4	125.8	74.6	72.3	78.7
A0A1S8Y4R0	BU230_39330	Glutamate/aspartate ABC transporter substrate-binding protein OS=Klebsiella pneumoniae GN=BU230_39330 PE=4 SV=1	65.0165	21	258	1	303	33.31	8.9	103.4	118.2	78	128.1	85.3	86.9
C8T6Q3	HMPREF0484_3295	Uncharacterized protein OS=Klebsiella pneumoniae subsp. rhinoscleromatis ATCC 13884 GN=HMPREF0484_3295 PE=4 SV=1	98.8095	18	245	1	168	18.91	5	136.7	142.9	144.1	57.3	59.2	59.9
A0A1C3PU19	aceE	Pyruvate dehydrogenase E1 component OS=Klebsiella pneumoniae GN=aceE PE=4 SV=1	51.8602	52	345	6	887	99.64	5.74	98.6	105.9	108.7	103.1	87.9	95.7
A0A2D3CQH0	KPH11_02835	Oligopeptide ABC transporter substrate-binding protein OppA OS=Klebsiella pneumoniae subsp. pneumoniae GN=KPH11_02835 PE=4 SV=1	79.9632	40	331	3	544	61.349	6.71	102.2	104.8	104.8	98.4	93.9	95.9
A0A1Y0Q912	B5K12_18900	Chemical-damaging agent resistance protein C OS=Klebsiella pneumoniae subsp. pneumoniae GN=B5K12_18900 PE=4 SV=1	82.8125	16	184	16	192	20.481	4.94	109.3	111	111.8	89.3	90.9	87.6
V0B2P9	HMPREF1619_03376	Antioxidant, AhpC/TSA family OS=Klebsiella pneumoniae 909957 GN=HMPREF1619_03376 PE=4 SV=1	78	15	188	1	200	22.355	5.29	82.2	80.8	81.6	115.9	118.8	120.7
J2DMH2	UUU_15490	Uncharacterized protein OS=Klebsiella pneumoniae subsp. pneumoniae DSM 30104 GN=UUU_15490 PE=4 SV=1	80.4878	13	219	3	164	18.21	5.19	128.5	132.9	135.6	69.5	65.6	67.9
A0A060VL74	ppsA	Phosphoenolpyruvate synthase OS=Klebsiella pneumoniae GN=ppsA PE=3 SV=1	57.4969	40	256	1	807	88.863	5.08	72.4	83	75.5	122	124.9	122.2
W9BHP6	oppA	OppA protein OS=Klebsiella pneumoniae GN=oppA PE=4 SV=1	76.2868	39	303	1	544	61.366	6.57	152.5	161.9	159.2	38.1	45.7	42.6
W8UGL7	clpB	Chaperone protein ClpB OS=Klebsiella pneumoniae 30684/NJST258_2 GN=clpB PE=3 SV=1	73.5192	58	214	2	861	95.691	5.62	99.8	101.4	103.4	97.9	99.4	98.1
A0A2D3CDL8	BMF28_07985	ATP-dependent chaperone ClpB OS=Klebsiella pneumoniae GN=BMF28_07985 PE=4 SV=1	73.8623	58	212	2	857	95.33	5.66	142.9	156.8	151.6	47.3	52.9	48.4
J2XAX7	tig	Trigger factor OS=Klebsiella pneumoniae subsp. pneumoniae DSM 30104 GN=tig PE=3 SV=1	72.4537	34	229	34	432	48.083	4.89	92.7	93.6	93.7	107.7	105.7	106.6
J2DGD9	UUU_37170	Outer membrane channel protein OS=Klebsiella pneumoniae subsp. pneumoniae DSM 30104 GN=UUU_37170 PE=4 SV=1	59	23	152	3	600	65.944	8.82	85.5	92.6	91.2	121	102.4	107.4
V0B873	HMPREF1619_01281	Negative regulator of genetic competence ClpC/MecB OS=Klebsiella pneumoniae 909957 GN=HMPREF1619_01281 PE=4 SV=1	75	64	254	8	952	104.766	6.02	47.6	44.5	46.5	152.6	157.7	151.2
A0A1W1K9C9	oppA_2	Oligopeptide ABC transporter substrate-binding protein OppA OS=Klebsiella pneumoniae GN=oppA_2 PE=4 SV=1	75.9191	36	291	1	544	61.368	6.57	85.5	98.4	84.5	110.6	122.8	98.2
A0A2D2IVV8	CTI63_13375	Peptidoglycan-binding protein LysM OS=Klebsiella pneumoniae GN=CTI63_13375 PE=4 SV=1	89.9329	14	280	1	149	15.884	5.38	89.2	94.1	95.7	112.9	101.6	106.4
A0A181YBA5	aceF	Acetyltransferase component of pyruvate dehydrogenase complex OS=Klebsiella pneumoniae GN=aceF PE=3 SV=1	78.9557	41	242	23	632	65.891	5.31	102.1	105.4	104.9	97.3	94.1	96.2
B5Y0Z0	KPK_4331	Antioxidant, AhpC/TSA family OS=Klebsiella pneumoniae (strain 342) GN=KPK_4331 PE=4 SV=1	78	15	176	1	200	22.341	5.29	122.2	125.8	126.7	71.8	79.6	74
A0A170J878	gltA_2	Citrate synthase OS=Klebsiella pneumoniae GN=gltA_2 PE=3 SV=1	68.1499	27	210	27	427	47.922	6.62	99.4	99	99.7	101.1	100.3	100.5
W1AVH9		DNA-directed RNA polymerase beta' subunit OS=Klebsiella pneumoniae IS22 PE=4 SV=1	47.2399	39	190	1	942	101.832	5.9	112.9	112.8	113.9	90.7	88.2	81.4
A0A2A5IAS5	argD	Acetylornithine/succinyldiaminopimelate aminotransferase OS=Klebsiella pneumoniae subsp. pneumoniae GN=argD PE=3 SV=1	72.4138	19	151	2	406	43.464	6.46	115.5	119.4	114.4	82.7	85.6	82.3
A0A2A2NIH7	lpdA	Dihydrolipoyl dehydrogenase OS=Klebsiella pneumoniae GN=lpdA PE=3 SV=1	64.2105	27	201	27	475	50.776	6.38	105.9	106.7	107.8	94.3	91.8	93.5
A0A060VQ44	tolC	TolC protein OS=Klebsiella pneumoniae GN=tolC PE=4 SV=1	59.6026	25	149	2	604	66.234	9.03	103.2	104.3	105.3	99.1	92.7	95.3
Q2YHZ7	mdh	Malate dehydrogenase (Fragment) OS=Klebsiella pneumoniae GN=mdh PE=3 SV=1	79.9127	15	151	1	229	23.595	5.63	101.5	88.6	79.6	94.8	129	106.4
A0A181W368	yjjK	ABC transporter OS=Klebsiella pneumoniae GN=yjjK PE=4 SV=1	78.1982	37	209	18	555	62.214	5.74	101.4	102.3	102.7	99.4	98	96.3
B5XU48	tolC	Outer membrane protein TolC OS=Klebsiella pneumoniae (strain 342) GN=tolC PE=4 SV=1	65.9878	24	149	1	491	53.289	6.19	80.9	79.6	84.2	113.2	129.8	112.3
A0A0E1CFA6	KPNJ1_01653	Phosphate acetyltransferase OS=Klebsiella pneumoniae 30660/NJST258_1 GN=KPNJ1_01653 PE=4 SV=1	59.4262	34	205	1	732	78.997	5.41	102	88.9	80.9	107.6	114.8	105.8
W9BPX4	P0A9M9	Phosphate acetyltransferase OS=Klebsiella pneumoniae GN=P0A9M9 PE=3 SV=1	60.8392	34	205	1	715	77.147	5.47	168.8	139	130.7	43.4	67.1	51
W1AQY2		ATP synthase beta chain OS=Klebsiella pneumoniae IS22 PE=4 SV=1	86.711	20	192	1	301	33.361	5.03	85.1	99.6	113.5	89.2	96.5	116
A0A193SDM6	gnd	6-phosphogluconate dehydrogenase, decarboxylating OS=Klebsiella pneumoniae GN=gnd PE=3 SV=1	76.2821	35	185	2	468	51.398	5.21	28.2	27.4	28.4	180.5	166.6	168.9
S6CLP1	gnd	6-phosphogluconate dehydrogenase, decarboxylating OS=Klebsiella pneumoniae GN=gnd PE=3 SV=1	76.2821	33	180	0	468	51.384	5.15
V0AN77	HMPREF1619_03495	PrkA AAA domain protein OS=Klebsiella pneumoniae 909957 GN=HMPREF1619_03495 PE=4 SV=1	79.8137	46	258	46	644	74.344	5.78	99.4	100.1	100.5	102.1	98.7	99.3
A0A2G3S204	CS332_01710	Porin OmpA OS=Klebsiella pneumoniae subsp. pneumoniae GN=CS332_01710 PE=4 SV=1	27.9202	9	232	1	351	37.648	5.74	105	110.8	99.1	101.7	88.7	94.7
A0A236QT91	CI704_09240	ATP-dependent Clp protease ATP-binding subunit OS=Klebsiella pneumoniae subsp. pneumoniae GN=CI704_09240 PE=4 SV=1	69.4952	59	239	3	931	102.437	5.91	31.5	30.9	32.5	174.9	165.3	164.9
A0A1S0WCI7	CKJ89_10910	Ferritin-like domain-containing protein OS=Klebsiella pneumoniae GN=CKJ89_10910 PE=4 SV=1	98.8095	19	237	2	168	18.968	4.93	95.8	102.4	99	99	102.1	101.8
A0A0V9IKH7	tpiA	Triosephosphate isomerase OS=Klebsiella pneumoniae GN=tpiA PE=3 SV=1	90.9804	18	319	18	255	26.893	6.16	98.9	99.5	99.5	98.3	103.6	100.2
A0A2D2J0P8	CTI63_22725	Molecular chaperone OsmY OS=Klebsiella pneumoniae GN=CTI63_22725 PE=4 SV=1	75.7282	17	175	1	206	21.329	7.62	98.1	102.8	102.3	101.2	93.8	101.8
W9BCF4	pnp	Polyribonucleotide nucleotidyltransferase OS=Klebsiella pneumoniae GN=pnp PE=3 SV=1	64.135	38	216	6	711	76.798	5.17	102.1	102.5	102.5	97.8	98.8	96.3
A6TH49	aspA	Aspartate ammonia-lyase OS=Klebsiella pneumoniae subsp. pneumoniae (strain ATCC 700721 / MGH 78578) GN=aspA PE=3 SV=1	74.477	25	214	2	478	52.047	5.21	102	98.6	100	101.1	99.9	98.3
A0A0E1CH76	sucC	Succinate--CoA ligase [ADP-forming] subunit beta OS=Klebsiella pneumoniae 30660/NJST258_1 GN=sucC PE=3 SV=1	79.6392	26	214	1	388	41.477	5.52	95.4	97.5	100.3	108.2	98.4	100.1
A0A1Y0Q684	B5K12_05245	Aspartate ammonia-lyase OS=Klebsiella pneumoniae subsp. pneumoniae GN=B5K12_05245 PE=3 SV=1	74.477	25	210	2	478	52.032	5.26	94.7	109.6	106.9	101.4	95.3	92
A0A2D2F315	CTI52_22760	Molecular chaperone OsmY OS=Klebsiella pneumoniae GN=CTI52_22760 PE=4 SV=1	75.7282	17	171	1	206	21.327	7.61	150.7	160.4	156.3	40.3	49.8	42.4
A7M6Y7	gnd	6-phosphogluconate dehydrogenase, decarboxylating OS=Klebsiella pneumoniae GN=gnd PE=3 SV=1	76.2821	35	177	4	468	51.407	5.27	159.7	168.7	166.7	32.6	40.3	32
A0A231WRK0	tkt	Transketolase OS=Klebsiella pneumoniae GN=tkt PE=3 SV=1	68.9759	36	258	1	664	72.154	6.09	67.5	70.9	70.5	128.1	126.9	136
A0A0J4Y5S1	rplL	50S ribosomal protein L7/L12 OS=Klebsiella pneumoniae GN=rplL PE=3 SV=1	81.8182	13	173	6	121	12.364	4.65	94.9	92.5	95.4	106.8	91.5	119
Q2YI00	mdh	Malate dehydrogenase (Fragment) OS=Klebsiella pneumoniae GN=mdh PE=3 SV=1	74.2358	13	140	1	229	23.6	5.25	91.9	78	92.8	117.2	90.9	129.2
A0A169BB55	gnd	6-phosphogluconate dehydrogenase, decarboxylating OS=Klebsiella pneumoniae GN=gnd PE=3 SV=1	76.2821	33	171	2	468	51.398	5.15	37.2	37.9	41.9	159.4	163.4	160.3
W9BPN8	pykA	Pyruvate kinase OS=Klebsiella pneumoniae GN=pykA PE=3 SV=1	81.3525	29	159	29	488	52.455	6.14	101.1	101.4	101.5	99.6	98.4	97.9
A0A193SEK2	gnd	6-phosphogluconate dehydrogenase, decarboxylating OS=Klebsiella pneumoniae GN=gnd PE=3 SV=1	76.2821	30	161	3	468	51.416	5.15	164.8	176.9	177.3	25.1	30.2	25.8
A0A2D3CTA4	KPH11_08035	Aspartate aminotransferase family protein OS=Klebsiella pneumoniae subsp. pneumoniae GN=KPH11_08035 PE=4 SV=1	72.4138	19	151	2	406	43.477	6.6	105.8	112.6	111.6	90.3	89.9	89.9
A0A060VFF2	acrA	AcrA protein OS=Klebsiella pneumoniae GN=acrA PE=3 SV=1	75.5396	25	197	21	417	44.578	8	91.3	91.9	92.1	109.2	106.3	109.3
A0A203BH36	B8011_02335	6-phosphogluconate dehydrogenase, decarboxylating OS=Klebsiella pneumoniae GN=B8011_02335 PE=3 SV=1	69.6581	33	179	2	468	51.385	5.2	122.1	128.7	131	75.1	69.4	73.7
V0AX41	infB	Translation initiation factor IF-2 OS=Klebsiella pneumoniae 909957 GN=infB PE=3 SV=1	73.3259	62	215	62	896	98.016	6.02	99.2	99.8	100.1	99.9	101.4	99.6
A0A1E1ES35	gnd	6-phosphogluconate dehydrogenase, decarboxylating OS=Klebsiella pneumoniae GN=gnd PE=3 SV=1	72.6496	32	173	4	468	51.397	5.2	100.3	110.6	112.9	95.3	86.9	94
A0A0E1CB63	ackA	Acetate kinase OS=Klebsiella pneumoniae 30660/NJST258_1 GN=ackA PE=3 SV=1	85.5	22	184	11	400	43.247	6.33	100.7	102.6	102.9	98.8	95	100
A0A0H3GRC2	KPHS_38120	Putative pyruvate decarboxylase OS=Klebsiella pneumoniae subsp. pneumoniae (strain HS11286) GN=KPHS_38120 PE=3 SV=1	82.0976	30	174	1	553	59.951	5.62	123.8	132.9	126	76.5	70.2	70.5
C8T1E8	sucC	Succinate--CoA ligase [ADP-forming] subunit beta OS=Klebsiella pneumoniae subsp. rhinoscleromatis ATCC 13884 GN=sucC PE=3 SV=1	79.6392	26	199	1	388	41.492	5.52	83.7	138.1	103.7	85.8	118.8	69.8
R4YI37	yhbO	YhbO protein OS=Klebsiella pneumoniae subsp. rhinoscleromatis SB3432 GN=yhbO PE=4 SV=1	70.5882	13	122	13	221	24.008	5.33	103.7	107.6	107.1	96.2	91.3	94.2
C8T1B7	pgl	6-phosphogluconolactonase OS=Klebsiella pneumoniae subsp. rhinoscleromatis ATCC 13884 GN=pgl PE=3 SV=1	77.1831	18	165	3	355	38.836	5.71	115.1	112.4	108.9	88.5	87.6	87.4
W9BPX9	fabB	3-oxoacyl-ACP synthase OS=Klebsiella pneumoniae GN=fabB PE=3 SV=1	80.0493	20	156	20	406	42.41	5.53	100.6	103.4	104.1	97.5	97.1	97.2
A0A2G3S0M7	CS332_03345	Glutamate/aspartate ABC transporter substrate-binding protein OS=Klebsiella pneumoniae subsp. pneumoniae GN=CS332_03345 PE=4 SV=1	44.702	13	167	2	302	33.395	8.28	112.5	111.8	113.7	90.1	88.2	83.6
A0A1B3A3H6	BCB67_11465	Transketolase OS=Klebsiella pneumoniae GN=BCB67_11465 PE=3 SV=1	68.9759	36	268	3	664	72.132	6.09	109.5	107.3	105	89.5	97.8	90.9
A0A231WHP5	acnB	Aconitate hydratase B OS=Klebsiella pneumoniae GN=acnB PE=3 SV=1	69.1329	50	233	1	865	93.515	5.33	95.7	98.4	104.6	100.9	99.1	101.3
W9BCI4	acnB2	Aconitate hydratase B OS=Klebsiella pneumoniae GN=acnB2 PE=3 SV=1	68.4211	50	230	1	874	94.587	5.4	93.9	96.7	97	108.8	101.6	102.1
A0A0H3GWS6	pckA	Phosphoenolpyruvate carboxykinase (ATP) OS=Klebsiella pneumoniae subsp. pneumoniae (strain HS11286) GN=pckA PE=3 SV=1	80.3704	34	186	1	540	59.54	5.66	95.3	100.1	97.6	114	97.9	95.1
A0A2A2NKN0	tkt	Transketolase OS=Klebsiella pneumoniae GN=tkt PE=3 SV=1	68.9759	36	254	1	664	72.14	6.09	144.9	141.2	151.2	50.4	60.5	51.8
A0A0C7KCZ0	ipdC	Indole-3-pyruvate decarboxylase OS=Klebsiella pneumoniae GN=ipdC PE=3 SV=1	82.0976	30	170	1	553	59.979	5.62	52.2	45.6	53.7	152	152.5	144
W1BEB8		Major outer membrane lipoprotein OS=Klebsiella pneumoniae IS22 PE=4 SV=1	66.6667	9	262	9	78	8.381	8.87	114.9	107.2	107.6	88.5	90.2	91.6
W9BB37	pckA	Phosphoenolpyruvate carboxykinase (ATP) OS=Klebsiella pneumoniae GN=pckA PE=3 SV=1	80.3704	34	182	1	540	59.51	5.76	94.2	104.2	99.4	96.9	107.5	97.8
A0A2D2PK65	CR231_05450	6-phosphogluconolactonase OS=Klebsiella pneumoniae GN=CR231_05450 PE=4 SV=1	83.6858	17	162	2	331	36.015	5.25	98.1	105.3	108.8	86.6	107.6	93.7
A0A193SE39	gnd	6-phosphogluconate dehydrogenase, decarboxylating OS=Klebsiella pneumoniae GN=gnd PE=3 SV=1	73.5043	28	163	1	468	51.338	5.06	111.5	120.5	123.4	80.1	80.2	84.3
W9BPT6	gnd	6-phosphogluconate dehydrogenase, decarboxylating OS=Klebsiella pneumoniae GN=gnd PE=3 SV=1	76.2821	33	168	1	468	51.393	5.21	172.3	141.8	150.5	46.9	43.5	45
V0B4N5	HMPREF1619_02594	2,5-diketo-D-gluconic acid reductase A OS=Klebsiella pneumoniae 909957 GN=HMPREF1619_02594 PE=4 SV=1	75.6364	21	241	7	275	30.725	6.47	104.1	107.8	107.8	94	92.7	93.7
W1HWR6	pnp	Polyribonucleotide nucleotidyltransferase OS=Klebsiella pneumoniae IS39 GN=pnp PE=3 SV=1	62.7246	33	188	1	668	72.364	5.22	99	102.1	107.7	119.8	98.6	72.8
A0A060VIS7	deoB	Phosphopentomutase OS=Klebsiella pneumoniae GN=deoB PE=3 SV=1	82.4818	29	202	6	411	44.769	5.25	102.9	106.7	105.2	98.6	92.6	94
A0A231WMW2	katG	Catalase-peroxidase OS=Klebsiella pneumoniae GN=katG PE=3 SV=1	59.7241	44	226	2	725	78.917	5.47	88.5	80.5	79	116.9	121.9	113.2
W1ARF1		Pyruvate kinase OS=Klebsiella pneumoniae IS22 PE=3 SV=1	40	16	128	1	470	50.697	6.09	123.1	98.4	108.2	83.1	95.3	91.8
A0A1Y0PUI1	tal	Transaldolase OS=Klebsiella pneumoniae subsp. pneumoniae GN=tal PE=3 SV=1	83.6478	26	238	1	318	35.434	7.15	119.4	107	104.3	92.3	87.8	89.2
A0A236ZXG4	alaS	Alanine--tRNA ligase OS=Klebsiella pneumoniae subsp. pneumoniae GN=alaS PE=3 SV=1	72	55	212	2	875	95.576	5.71	75.9	66.1	65	135	129.2	128.8
A0A060VFI4	gpmA	2,3-bisphosphoglycerate-dependent phosphoglycerate mutase OS=Klebsiella pneumoniae GN=gpmA PE=3 SV=1	69.3103	20	197	5	290	33.122	6.96	103.7	106.3	106.3	96.4	91.7	95.7
A0A1S0WHH2	CR231_02480	4-aminobutyrate aminotransferase GabT OS=Klebsiella pneumoniae GN=CR231_02480 PE=3 SV=1	81.2646	27	169	2	427	45.518	5.81	69.2	70.2	73.6	132.1	127.2	127.7
W1ASX7		2-oxoglutarate dehydrogenase E1 component OS=Klebsiella pneumoniae IS22 PE=4 SV=1	43.8809	32	208	2	907	102.027	6.67	98.4	99.1	99.2	101.6	99.3	102.4
A0A1W1KDD8	tolC	Outer membrane channel protein OS=Klebsiella pneumoniae GN=tolC PE=4 SV=1	47.9424	18	112	1	486	52.847	5.53	91.4	93	90.9	109.9	105.7	109.2
W8UKR5	KPNJ2_03724	Outer membrane protein X OS=Klebsiella pneumoniae 30684/NJST258_2 GN=KPNJ2_03724 PE=4 SV=1	72.093	13	292	4	172	18.682	8.72	112.4	119.6	121.3	84.9	78.2	83.6
A0A086IYQ5	tal	Transaldolase OS=Klebsiella pneumoniae GN=tal PE=3 SV=1	83.6478	26	237	1	318	35.464	7.15	139.4	143.4	146.2	54.8	57.5	58.7
A0A2D0AW68	B5K12_19060	Uncharacterized protein OS=Klebsiella pneumoniae subsp. pneumoniae GN=B5K12_19060 PE=4 SV=1	57.8431	19	216	19	306	32.234	8.9	152.1	159.7	158	41.2	46.1	42.9
A0A2A2NQU9	CKJ89_04295	Aspartate aminotransferase family protein OS=Klebsiella pneumoniae GN=CKJ89_04295 PE=3 SV=1	81.2646	26	164	1	427	45.469	5.78	102.2	92.7	92.6	106.5	121.9	84
W1EE66		Manganese catalase OS=Klebsiella pneumoniae IS53 PE=4 SV=1	79.661	19	151	2	295	31.561	4.98	155	155.1	151.3	45.6	49.5	43.6
A0A1Y0Q0H4	B5K12_08585	NADH-quinone oxidoreductase OS=Klebsiella pneumoniae subsp. pneumoniae GN=B5K12_08585 PE=3 SV=1	64.7577	47	164	1	908	99.556	6.54	137.9	144.7	140.4	56.7	58.8	61.4
W1GS19	groS	10 kDa chaperonin OS=Klebsiella pneumoniae ISC21 GN=groS PE=3 SV=1	86.5979	9	168	9	97	10.368	5.5	103.8	105.8	106.6	95.1	88.8	99.8
W1B476		Manganese catalase OS=Klebsiella pneumoniae IS22 PE=4 SV=1	79.661	19	155	2	295	31.547	4.98	83.6	84.3	83.4	123.5	117.4	107.7
A0A2H2W2D8	katG	Catalase-peroxidase OS=Klebsiella pneumoniae GN=katG PE=4 SV=1	59.5862	43	219	1	725	78.947	5.47	63.3	67.4	71.9	124.5	125.7	147.2
W8VI18	secA	Protein translocase subunit SecA OS=Klebsiella pneumoniae 30684/NJST258_2 GN=secA PE=2 SV=1	63.485	47	167	6	901	101.896	5.64	101.6	108.7	108.7	95.5	93.8	91.7
A0A169FJ88	nuoG	NADH-quinone oxidoreductase OS=Klebsiella pneumoniae GN=nuoG PE=3 SV=1	64.7577	47	162	2	908	99.558	6.54	59.4	63.8	65.5	141.2	133.6	136.5
A0A1Y0PYD0	B5K12_02535	Nitrate reductase subunit alpha OS=Klebsiella pneumoniae subsp. pneumoniae GN=B5K12_02535 PE=3 SV=1	63.6728	64	198	1	1247	140.407	6.83	131.4	119.6	107.3	72.8	90.2	78.7
R4Y777	maeB	MaeB protein OS=Klebsiella pneumoniae subsp. rhinoscleromatis SB3432 GN=maeB PE=4 SV=1	67.1937	39	184	22	759	82.304	5.54	101	102.3	102.7	97.9	98.4	97.7
D6PM13	ompK35	OmpK35 porin OS=Klebsiella pneumoniae GN=ompK35 PE=4 SV=1	71.0306	18	231	5	359	39.485	4.92	118.8	122.2	123.9	77.2	79.4	78.5
J2DKF6	UUU_23140	Nitrate reductase, alpha subunit OS=Klebsiella pneumoniae subsp. pneumoniae DSM 30104 GN=UUU_23140 PE=3 SV=1	62.8662	64	196	1	1263	142.341	7.05	107.3	101.9	104.3	98.8	94.4	93.4
W1E793	sucD	Succinate--CoA ligase [ADP-forming] subunit alpha OS=Klebsiella pneumoniae IS46 GN=sucD PE=3 SV=1	92.3875	18	245	1	289	29.838	6.54	101.9	108.3	109.3	95.5	89.2	95.8
V0AW31	alaS	Alanine--tRNA ligase OS=Klebsiella pneumoniae 909957 GN=alaS PE=3 SV=1	71.2	54	205	1	875	95.547	5.71	88.1	95.5	99.6	93.4	113	110.4
A0A2G3RSQ2	CS332_18050	Porin OmpC OS=Klebsiella pneumoniae subsp. pneumoniae GN=CS332_18050 PE=4 SV=1	22.6064	6	169	1	376	41.074	4.73	107.6	106.5	107.9	89.4	101.3	87.3
W9BD07	deoD	Purine nucleoside phosphorylase DeoD-type OS=Klebsiella pneumoniae GN=deoD PE=3 SV=1	88.2845	21	160	21	239	25.928	5.86	97.3	99.2	98.4	102.3	100.7	102.1
A0A168Y2X7	sucD	Succinate--CoA ligase [ADP-forming] subunit alpha OS=Klebsiella pneumoniae GN=sucD PE=3 SV=1	92.3875	18	240	1	289	29.847	6.07	44.7	33.9	35.3	165.8	161.6	158.8
A0A0E1CJ09	lon	Lon protease OS=Klebsiella pneumoniae 30660/NJST258_1 GN=lon PE=2 SV=1	66.7073	54	175	54	820	91.399	6.11	103.1	104.5	103.8	96.7	95.9	95.9
A0A1C3PL64	tktB_1	Transketolase OS=Klebsiella pneumoniae GN=tktB_1 PE=3 SV=1	56.1747	26	210	4	664	72.131	6.14	104.8	112.9	109.1	91.2	92.2	89.9
A0A1W1ND08	pckA_2	Phosphoenolpyruvate carboxykinase (ATP) OS=Klebsiella pneumoniae GN=pckA_2 PE=3 SV=1	70.5556	30	161	1	540	59.513	5.67	111.5	106.4	102.4	99.9	95.8	83.9
W1DWW0	ftsZ	Cell division protein FtsZ OS=Klebsiella pneumoniae IS46 GN=ftsZ PE=3 SV=1	93.2115	28	114	2	383	40.317	4.78	104.2	111.8	107.9	94.6	88.3	93.3
A0A2A2NM18	hutH	Histidine ammonia-lyase OS=Klebsiella pneumoniae GN=hutH PE=3 SV=1	69.8819	22	119	1	508	53.898	6.04	135.4	142.4	135.7	56.5	73.2	56.8
A0A1B1LQX2	CQB04_14785	Chemical-damaging agent resistance protein C OS=Klebsiella pneumoniae GN=CQB04_14785 PE=4 SV=1	54.9738	6	97	3	191	20.368	4.93	119.7	124.8	124.6	76.5	80	74.4
A0A0J4XVU2	SM87_01889	Protein YciF OS=Klebsiella pneumoniae GN=SM87_01889 PE=4 SV=1	78.0488	12	170	2	164	18.167	5.19	207.4	89.3	69.6	71.2	95.2	67.3
A0A0W8ARE5	aspS	Aspartate--tRNA ligase OS=Klebsiella pneumoniae GN=aspS PE=3 SV=1	76.3025	44	151	20	595	66.373	5.55	97.4	101.3	100.4	97.9	104.8	98.2
A0A2G4PYR7	CS372_10660	NADH-quinone oxidoreductase subunit G OS=Klebsiella pneumoniae GN=CS372_10660 PE=4 SV=1	62.4449	44	153	1	908	99.53	6.48	81.2	94.5	86.3	93.3	165.1	79.6
W1ASW5	rplE	50S ribosomal protein L5 OS=Klebsiella pneumoniae IS22 GN=rplE PE=3 SV=1	77.6536	17	195	17	179	20.289	9.48	92.6	94.3	94.3	108.2	102.5	108.2
A0A181RQQ5	ftsZ	Cell division protein FtsZ OS=Klebsiella pneumoniae GN=ftsZ PE=3 SV=1	93.2115	27	112	1	383	40.287	4.78	55.4	49.6	52.3	150.9	146.6	145.2
A0A236RDP7	CI704_08815	Dihydrolipoyllysine-residue succinyltransferase component of 2-oxoglutarate dehydrogenase complex OS=Klebsiella pneumoniae subsp. pneumoniae GN=CI704_08815 PE=3 SV=1	70.5882	27	193	1	408	44.215	5.92	74.6	69.4	63.1	127.3	131.7	134.1
A0A2G3S3B9	CS332_00160	50S ribosomal protein L14 OS=Klebsiella pneumoniae subsp. pneumoniae GN=CS332_00160 PE=4 SV=1	57.7236	8	137	8	123	13.559	10.42	94.4	95.5	94	104.6	106.3	105.1
A0A2G8ATV0	C630_03035	Dihydrolipoamide succinyltransferase OS=Klebsiella pneumoniae subsp. pneumoniae KpO3210 GN=C630_03035 PE=4 SV=1	70.5882	27	191	1	408	44.187	5.92	99.1	105.2	99.1	103.9	96	96.8
A0A169DNP4	poxB	Pyruvate dehydrogenase OS=Klebsiella pneumoniae GN=poxB PE=3 SV=1	77.2727	33	187	1	572	61.975	6.38	26	30.1	30.3	180.6	164.8	168
A0A1V0CDF8	AM447_25190	NAD(P)-dependent oxidoreductase OS=Klebsiella pneumoniae GN=AM447_25190 PE=4 SV=1	76.9737	17	245	4	304	32.437	4.92	118.5	122.1	125.2	78.1	70.1	86
W8UJV3	KPNJ2_03379	Isocitrate dehydrogenase [NADP] OS=Klebsiella pneumoniae 30684/NJST258_2 GN=KPNJ2_03379 PE=4 SV=1	72.8538	36	230	36	431	47.66	5.69	101.7	103.2	103.4	99.3	93.1	99.3
A0A0E1CLL3	hutH	Histidine ammonia-lyase OS=Klebsiella pneumoniae 30660/NJST258_1 GN=hutH PE=3 SV=1	70.0787	23	119	1	508	53.914	6.04	86.6	88.1	89.2	104.7	123.2	108.2
W1HXG0		Periplasmic serine endoprotease DegP-like OS=Klebsiella pneumoniae IS39 PE=3 SV=1	57.0833	27	166	7	480	49.843	8.75	99.1	99	98.2	102.3	101.8	99.7
A0A1C1RCD5	BCB67_03965	Pyruvate dehydrogenase OS=Klebsiella pneumoniae GN=BCB67_03965 PE=3 SV=1	77.2727	35	192	1	572	61.96	6.52	153	157.4	159.1	44.3	44.2	41.9
A0A2A2SYM1	tal	Transaldolase OS=Klebsiella pneumoniae GN=tal PE=3 SV=1	80.4416	26	165	11	317	35.156	5.15	100.4	103.3	102.8	100.9	95.1	97.6
W1DZD0		Outer membrane protein W OS=Klebsiella pneumoniae IS46 PE=4 SV=1	53.5714	7	187	7	224	24.321	5.57	111.2	112.3	112.9	87.7	85.9	89.9
W1B8D7	rplX	50S ribosomal protein L24 OS=Klebsiella pneumoniae IS22 GN=rplX PE=3 SV=1	80.7692	13	132	13	104	11.309	10.21	98.5	100.2	100.9	102.2	96.9	101.4
A0A2D2EK96	hutH	Histidine ammonia-lyase OS=Klebsiella pneumoniae GN=hutH PE=4 SV=1	63.3858	22	115	1	508	53.898	6.04	157	143.9	143.8	44.8	63.1	47.4
A0A2D2PVD0	CR231_24720	Glucose-6-phosphate isomerase OS=Klebsiella pneumoniae GN=CR231_24720 PE=4 SV=1	74.1348	36	219	4	549	61.304	6.23	100	96.1	94.4	105	105.1	99.4
A0A2G4Y8X8	CQB04_25210	Ubiquinone-dependent pyruvate dehydrogenase OS=Klebsiella pneumoniae GN=CQB04_25210 PE=4 SV=1	77.2727	34	189	1	572	62.002	6.52	181.6	189.8	178.5	14.8	16.2	19.1
W1GV22		Glutamine ABC transporter, periplasmic glutamine-binding protein (TC 3.A.1.3.2) OS=Klebsiella pneumoniae ISC21 PE=3 SV=1	83.9216	25	199	13	255	27.865	8.76	98.9	102.4	102.3	101.8	96.1	98.6
A0A1C3Q7F8	yghA	Putative oxidoreductase OS=Klebsiella pneumoniae GN=yghA PE=4 SV=1	68.75	14	231	1	304	32.397	4.81	126.4	133.5	130	70.3	67.4	72.5
W9BK23	frdA	Fumarate reductase flavoprotein subunit OS=Klebsiella pneumoniae GN=frdA PE=3 SV=1	72.1477	36	158	3	596	65.481	6.16	88	92.3	92.7	107.9	108.9	110.1
A0A2D2JAN1	CTI63_12785	OsmC family peroxiredoxin OS=Klebsiella pneumoniae GN=CTI63_12785 PE=4 SV=1	62.2378	7	102	7	143	15.042	5.43	106.9	106.2	106.3	92.6	87.6	100.3
A0A1W1K340	yciE_1	Protein yciE OS=Klebsiella pneumoniae GN=yciE_1 PE=4 SV=1	77.9762	13	151	1	168	18.852	4.97
A0A060VFF6	htpG	Chaperone protein HtpG OS=Klebsiella pneumoniae GN=htpG PE=3 SV=1	73.2719	46	177	4	651	74.194	5.39	116.2	119.7	120.4	80.5	83.7	79.6
A0A0C7KHC9	hutH	Histidine ammonia-lyase OS=Klebsiella pneumoniae GN=hutH PE=3 SV=1	64.7638	22	115	1	508	53.9	6.04	81.2	81.9	79.8	123.1	116.8	117.1
W8UE55	glyA	Serine hydroxymethyltransferase OS=Klebsiella pneumoniae 30684/NJST258_2 GN=glyA PE=3 SV=1	63.2458	30	157	11	419	45.698	6.61	88.5	88.9	90.6	114.6	107.5	110
A0A170RWT2	ompX	Outer membrane protein OmpX OS=Klebsiella pneumoniae GN=ompX PE=4 SV=1	72.9412	13	233	4	170	18.453	8.24	66.7	71.3	72.4	133.1	120.8	135.6
A0A1V0C5G8	acs	Acetyl-coenzyme A synthetase OS=Klebsiella pneumoniae GN=acs PE=3 SV=1	69.9387	39	156	1	652	71.933	5.97	126.5	121.4	121.3	76	80.4	74.3
W1AS80		Phosphotransferase system, phosphocarrier protein HPr OS=Klebsiella pneumoniae IS22 PE=4 SV=1	78.8235	6	124	6	85	9.114	5.83	90.6	93.5	93.4	108.3	101.7	112.5
A0A0J4XGK9	pckA	Phosphoenolpyruvate carboxykinase (ATP) OS=Klebsiella pneumoniae GN=pckA PE=3 SV=1	64.4444	29	152	1	540	59.504	5.58	89.9	93.3	104.8	113.3	90.7	107.9
W1AW64		Pyruvate formate-lyase OS=Klebsiella pneumoniae IS22 PE=4 SV=1	50.7123	33	175	3	702	78.678	6.57	97.4	90.4	83.9	107.6	117.5	103.2
A0A237QBM0	luxS	S-ribosylhomocysteine lyase OS=Klebsiella pneumoniae GN=luxS PE=3 SV=1	84.7953	12	167	7	171	19.389	5.24	97.3	95.6	96.4	103.1	102.5	105.1
A0A1B2ZW95	BCB67_16390	Glycoprotein-polysaccharide metabolism protein OS=Klebsiella pneumoniae GN=BCB67_16390 PE=4 SV=1	26.9939	2	109	2	163	17.069	7.44	111.5	109.3	109.1	86.7	89.6	93.8
A0A170WLS0	htpG	Chaperone protein HtpG OS=Klebsiella pneumoniae GN=htpG PE=3 SV=1	75.3205	43	166	3	624	70.959	5.24	49	46.8	49.2	160.8	141.2	153
B5Y1T9	secA	Protein translocase subunit SecA OS=Klebsiella pneumoniae (strain 342) GN=secA PE=3 SV=1	55.3829	43	144	2	901	101.895	5.57	85.5	90.3	90.7	112.3	107.7	113.4
A0A168XM07	acs	Acetyl-coenzyme A synthetase OS=Klebsiella pneumoniae GN=acs PE=3 SV=1	69.9387	39	155	1	652	71.893	6.05	122.7	112.8	119.7	72.6	116.1	56.1
A0A2D3CW55	KPH11_13485	4-aminobutyrate--2-oxoglutarate transaminase OS=Klebsiella pneumoniae subsp. pneumoniae GN=KPH11_13485 PE=4 SV=1	73.0679	25	143	3	427	45.557	6.06	148	157	154.8	41.8	56.5	41.8
A0A1Y0Q6F1	pgi	Glucose-6-phosphate isomerase OS=Klebsiella pneumoniae subsp. pneumoniae GN=pgi PE=3 SV=1	72.3133	35	216	3	549	61.29	6.3	95.6	96	96.5	110.5	95.5	105.8
V0AVF7	HMPREF1619_02696	Glutamate dehydrogenase OS=Klebsiella pneumoniae 909957 GN=HMPREF1619_02696 PE=3 SV=1	67.217	25	162	25	424	46.35	5.91	89.9	90.3	90.7	111	106.7	111.3
A0A231WKB8	hutH	Histidine ammonia-lyase OS=Klebsiella pneumoniae GN=hutH PE=3 SV=1	63.3858	22	113	1	508	53.942	6.04	128.2	134.1	144.4	66.8	68.1	58.4
A0A2G3RYI7	deoB	Phosphopentomutase OS=Klebsiella pneumoniae subsp. pneumoniae GN=deoB PE=4 SV=1	64.6192	23	171	3	407	44.248	5.35	131	101.6	91.2	94.9	98.4	83
W8UYI3	KPNJ2_03918	Universal stress protein family protein OS=Klebsiella pneumoniae 30684/NJST258_2 GN=KPNJ2_03918 PE=3 SV=1	82.6389	8	93	1	144	16.21	7.42	79.4	75.3	80.6	120.1	121.7	123
A0A2G4Y9X2	CQB04_23865	Universal stress protein UspG OS=Klebsiella pneumoniae GN=CQB04_23865 PE=4 SV=1	83.8028	8	94	1	142	16	7.08	133.9	121.3	134.2	65.2	79	66.5
A0A2D2EMA9	CTI52_22345	LPS assembly protein LptD OS=Klebsiella pneumoniae GN=CTI52_22345 PE=4 SV=1	72.7621	44	147	2	782	88.433	5.47	89.9	90.5	91.8	106.8	115.2	105.8
A0A263K3L2	treA	Periplasmic trehalase OS=Klebsiella pneumoniae GN=treA PE=3 SV=1	63.6833	29	142	1	581	64.244	5.96	17.8	19	20	195	173.8	174.3
A0A1W1J698	cpo	Putative non-heme chloroperoxidase OS=Klebsiella pneumoniae GN=cpo PE=4 SV=1	85.6115	16	136	2	278	30.649	6.34	102	104.1	110.3	96.2	99.6	87.8
A0A181UPY6	lptD	LPS-assembly protein LptD OS=Klebsiella pneumoniae GN=lptD PE=3 SV=1	72.7621	44	146	2	782	88.492	5.36	120.5	117.2	118.2	74.5	94.3	75.3
A0A2G8AAK1	C630_26695	Molecular chaperone OS=Klebsiella pneumoniae subsp. pneumoniae KpO3210 GN=C630_26695 PE=4 SV=1	63.354	10	127	10	161	17.834	9.66	96.6	97.4	98	103.8	102.8	101.4
A0A0E1CM48	KPNJ1_03832	Peptidoglycan-associated lipoprotein OS=Klebsiella pneumoniae 30660/NJST258_1 GN=KPNJ1_03832 PE=3 SV=1	70.8791	11	162	6	182	19.764	7.42	103.8	100.6	101.6	98.2	98.2	97.5
A0A1S9BM70	tuf	Elongation factor Tu OS=Klebsiella pneumoniae GN=tuf PE=3 SV=1	21.2658	5	127	2	395	42.912	5.01	87	97.7	94.4	106.3	97.1	117.5
J2DH15	glgC	Glucose-1-phosphate adenylyltransferase OS=Klebsiella pneumoniae subsp. pneumoniae DSM 30104 GN=glgC PE=3 SV=1	78.6543	24	127	24	431	48.49	6.34	102.2	103.4	103.5	97.2	96.2	97.6
A0A0J4TJB2	phoC_1	Acid phosphatase OS=Klebsiella pneumoniae GN=phoC_1 PE=3 SV=1	61.2903	14	111	14	248	26.904	8.24	95	95.6	96.6	104.5	103	105.3
A0A1E3F192	treA	Periplasmic trehalase OS=Klebsiella pneumoniae GN=treA PE=3 SV=1	58.864	27	143	1	581	64.257	5.96	125	133.8	136.9	64.6	69.7	70
R4YB81	cpo	Cpo protein OS=Klebsiella pneumoniae subsp. rhinoscleromatis SB3432 GN=cpo PE=4 SV=1	70.1439	15	134	2	278	30.705	6.27	106.1	108.7	104.4	94.5	97	89.4
A0A080SSI8	glmS_1	Glutamine--fructose-6-phosphate aminotransferase [isomerizing] OS=Klebsiella pneumoniae GN=glmS_1 PE=3 SV=1	64.532	32	115	1	609	66.815	5.88	96.4	96.7	93.8	91.5	113.8	107.8
J2E589	UUU_17780	Uncharacterized protein OS=Klebsiella pneumoniae subsp. pneumoniae DSM 30104 GN=UUU_17780 PE=4 SV=1	65.3631	24	124	1	537	57.223	4.92	104.2	101.3	131.3	85	97.6	80.7
A6T5E8	ribH	6,7-dimethyl-8-ribityllumazine synthase OS=Klebsiella pneumoniae subsp. pneumoniae (strain ATCC 700721 / MGH 78578) GN=ribH PE=3 SV=1	94.8718	12	115	12	156	16.147	5.25	97	101.4	102.8	102.8	96	100.1
A0A1V0C6Z8	hldD	ADP-L-glycero-D-manno-heptose-6-epimerase OS=Klebsiella pneumoniae GN=hldD PE=3 SV=1	72.5806	26	144	4	310	34.841	4.97	96.7	105.4	104.5	101.5	93.9	98
W1E7P4	nuoC	NADH-quinone oxidoreductase subunit C/D OS=Klebsiella pneumoniae IS46 GN=nuoC PE=3 SV=1	70.2658	36	139	1	602	69.066	6.24
A0A2D1J508	CR230_20745	DUF945 domain-containing protein OS=Klebsiella pneumoniae GN=CR230_20745 PE=4 SV=1	58.5551	23	111	1	526	56.001	4.82	42.2	33.9	40.9	165.2	148.7	169.1
J2LQN7	guaB	Inosine-5'-monophosphate dehydrogenase OS=Klebsiella pneumoniae subsp. pneumoniae DSM 30104 GN=guaB PE=3 SV=1	71.1765	25	103	25	510	54.541	6.86	102.9	103.5	102.7	97.3	96.5	97
A0A2G8AL55	C630_14150	NADH-quinone oxidoreductase subunit C/D OS=Klebsiella pneumoniae subsp. pneumoniae KpO3210 GN=C630_14150 PE=4 SV=1	70.0669	36	138	1	598	68.608	6.24
W1BJL4		Outer membrane protein C OS=Klebsiella pneumoniae IS22 PE=3 SV=1	13.8965	5	152	1	367	40.343	4.82	76.4	70.5	73.1	119.6	135.2	125.1
A0A1C3PMW8	katE	Catalase OS=Klebsiella pneumoniae GN=katE PE=3 SV=1	48.4043	32	198	2	752	83.552	5.82	113.4	114.7	124.1	89.3	81	77.5
W8UHC2	KPNJ2_01675	Ribonucleoside-diphosphate reductase OS=Klebsiella pneumoniae 30684/NJST258_2 GN=KPNJ2_01675 PE=3 SV=1	58.7438	38	146	2	812	91.482	6.29	92.7	96.6	99	114.2	102.2	95.2
A0A0E1C7F1	rpsE	30S ribosomal protein S5 OS=Klebsiella pneumoniae 30660/NJST258_1 GN=rpsE PE=3 SV=1	74.8503	14	137	7	167	17.636	10.27	96	94.1	93.9	103.9	106.1	105.9
W9BK84	glmS	Glutamine--fructose-6-phosphate aminotransferase [isomerizing] OS=Klebsiella pneumoniae GN=glmS PE=3 SV=1	64.532	32	112	1	609	66.888	5.96	80.8	86.5	88.5	101.9	130.1	112.2
A6THB4	rplI	50S ribosomal protein L9 OS=Klebsiella pneumoniae subsp. pneumoniae (strain ATCC 700721 / MGH 78578) GN=rplI PE=3 SV=1	87.9195	14	172	14	149	15.783	6.58	94.4	94.8	95.2	105.9	105.3	104.2
A0A0J4Y058	SM87_01659	Aminotransferase OS=Klebsiella pneumoniae GN=SM87_01659 PE=3 SV=1	68.6869	29	154	1	396	43.543	5.5	108.5	103.3	101.1	98.3	95.9	92.9
A0A231WJ32	csiD	Protein CsiD OS=Klebsiella pneumoniae GN=csiD PE=3 SV=1	78.1538	20	172	2	325	37.346	6.33	88	76.7	73	121.2	120	121
A0A2G3S0C1	CS332_03030	Dihydrolipoyllysine-residue succinyltransferase OS=Klebsiella pneumoniae subsp. pneumoniae GN=CS332_03030 PE=4 SV=1	46.0591	20	157	1	406	44.059	5.82	93.3	94.4	97.8	103.6	104	106.8
A0A0J4XZ41	SM87_01660	Outer membrane pore protein F OS=Klebsiella pneumoniae GN=SM87_01660 PE=4 SV=1	52.9248	15	108	2	359	39.411	4.97	123.8	119.7	116.2	79.9	85.3	75.2
W9BDE7	csiD	Protein CsiD OS=Klebsiella pneumoniae GN=csiD PE=3 SV=1	78.1538	20	180	2	325	37.331	6.33	103.3	99.9	100.9	96.2	101	98.7
A0A1Y0Q226	proS	Proline--tRNA ligase OS=Klebsiella pneumoniae subsp. pneumoniae GN=proS PE=3 SV=1	74.3007	33	112	1	572	63.483	5.12	96.3	98.7	95.8	104.6	107.8	96.8
W9BAH4	hldD	ADP-L-glycero-D-manno-heptose-6-epimerase OS=Klebsiella pneumoniae GN=hldD PE=3 SV=1	71.9355	23	136	1	310	34.931	4.93	125.8	129.6	128	73.5	70.1	73.1
A0A1B1LQY7	CQB04_23000	Porin OmpC OS=Klebsiella pneumoniae GN=CQB04_23000 PE=4 SV=1	28.3379	10	198	1	367	40.329	4.88	213.7	73.5	67.1	73.7	99.8	72.3
A0A2D2ERN0	CTI52_01160	ABC transporter substrate-binding protein OS=Klebsiella pneumoniae GN=CTI52_01160 PE=4 SV=1	73.271	35	165	22	535	60.117	7.2	97.5	99.6	99	103.9	99.2	100.8
W1B1M7	rplA	50S ribosomal protein L1 OS=Klebsiella pneumoniae IS22 GN=rplA PE=3 SV=1	65.3846	21	140	2	234	24.714	9.64	104.5	99.2	98.5	88.6	109	100.2
W1B6X9		Superoxide dismutase OS=Klebsiella pneumoniae IS22 PE=3 SV=1	85.4922	10	197	1	193	21.134	6.19	74.7	75.6	77.8	132.9	116	123
A0A2A2SLR7	BVX91_27495	Elongation factor Tu (Fragment) OS=Klebsiella pneumoniae GN=BVX91_27495 PE=4 SV=1	86.8421	6	126	4	76	8.314	8.54	103.9	105.1	105	97.1	89.7	99.1
A0A2G8LYF0	treA	Alpha,alpha-trehalase OS=Klebsiella pneumoniae GN=treA PE=4 SV=1	56.3793	27	135	1	580	64.41	5.96	29.3	24.3	31.2	171	171.6	172.5
A0A1C3Q960	sodB	Superoxide dismutase OS=Klebsiella pneumoniae GN=sodB PE=3 SV=1	85.4922	10	192	1	193	21.149	6.19	180.2	193	192.4	9.3	14.4	10.6
A0A0E1CFQ7	KPNJ1_01768	D-galactose-binding protein OS=Klebsiella pneumoniae 30660/NJST258_1 GN=KPNJ1_01768 PE=4 SV=1	73.9766	29	201	29	342	36.893	7.06	96.8	98.6	98.7	104.1	99.6	102.2
A0A060VDM5	ileS	Isoleucine--tRNA ligase OS=Klebsiella pneumoniae GN=ileS PE=3 SV=1	70	49	162	1	950	105.834	5.94	111.6	111.5	114	92.7	86.6	83.7
A0A0H3GV47	amn	AMP nucleosidase OS=Klebsiella pneumoniae subsp. pneumoniae (strain HS11286) GN=amn PE=3 SV=1	63.843	24	112	1	484	54.196	6.21	94.7	101.9	102.3	95.1	110.3	95.7
A0A1S0W9Q9	amn	AMP nucleosidase OS=Klebsiella pneumoniae GN=amn PE=3 SV=1	63.843	24	113	1	484	54.195	6.29	102.3	106.2	103	103.3	90.9	94.3
A0A2D2PTW4	CR231_21855	Oligopeptidase A OS=Klebsiella pneumoniae GN=CR231_21855 PE=4 SV=1	65.2941	44	140	3	680	76.638	5.33	121.3	128.4	126.7	76.8	70.5	76.3
A0A1Y0PXE4	B5K12_20795	Superoxide dismutase OS=Klebsiella pneumoniae subsp. pneumoniae GN=B5K12_20795 PE=3 SV=1	85.4922	10	194	1	193	21.165	6.19	171.4	183.7	177.3	21.7	22.9	23
A0A168U209	frdA	Fumarate reductase flavoprotein subunit OS=Klebsiella pneumoniae GN=frdA PE=3 SV=1	73.6577	35	150	2	596	65.433	6.14	112.1	109.7	109.9	83.8	98.8	85.8
A0A2G4YLC9	CQB04_01380	Ribonucleoside-diphosphate reductase subunit alpha OS=Klebsiella pneumoniae GN=CQB04_01380 PE=4 SV=1	62.6807	38	142	2	761	85.611	5.9	110.2	107.3	102.5	91.1	93	95.9
W1DYM6		Uridine phosphorylase OS=Klebsiella pneumoniae IS46 PE=3 SV=1	86.9565	14	107	6	253	27.022	6.29	98	96.9	97.6	101	104.2	102.3
A0A1W1JCS3	glyS	Glycine--tRNA ligase beta subunit OS=Klebsiella pneumoniae GN=glyS PE=3 SV=1	77.3585	48	138	28	689	76.283	5.64	94.5	95.3	95.7	104.3	105.6	104.6
A0A2G4RZF0	CK204_01420	Glycogen phosphorylase OS=Klebsiella pneumoniae GN=CK204_01420 PE=4 SV=1	60.2454	47	175	7	815	93.49	5.66	97.1	98.1	99.8	101.3	105.7	97.9
C8SZN2	prlC	Oligopeptidase A OS=Klebsiella pneumoniae subsp. rhinoscleromatis ATCC 13884 GN=prlC PE=3 SV=1	65.2941	44	143	1	680	76.697	5.29	74.6	82.1	76	128.8	122.7	115.8
A0A2G4YJW9	CQB04_02530	30S ribosomal protein S6 OS=Klebsiella pneumoniae GN=CQB04_02530 PE=4 SV=1	68.7023	9	109	9	131	15.137	5.38	96.1	94.8	95.2	105.2	105	103.7
A0A2G8ARB3	C630_11340	3-deoxy-8-phosphooctulonate synthase OS=Klebsiella pneumoniae subsp. pneumoniae KpO3210 GN=C630_11340 PE=4 SV=1	88.7324	22	117	1	284	30.805	6.32	104.7	110.1	108.5	92.8	90.6	93.3
A0A2G8AN00	fabG	3-oxoacyl-ACP reductase OS=Klebsiella pneumoniae subsp. pneumoniae KpO3210 GN=fabG PE=4 SV=1	67.2131	11	90	11	244	25.494	6.6	93.9	94.7	94.5	105.8	105.8	105.3
A0A2D2PVU7	CR231_25600	Adenylosuccinate synthase OS=Klebsiella pneumoniae GN=CR231_25600 PE=4 SV=1	76.6204	28	119	28	432	47.083	5.39	92.9	94.2	94.2	106.2	106.5	106
A0A1W1M0Y5	BU230_02670	Catalase OS=Klebsiella pneumoniae GN=BU230_02670 PE=3 SV=1	50.6649	31	193	1	752	83.481	5.82	69.1	90.2	86.5	125	114.8	114.4
A0A1W1K2I3	katE	Catalase OS=Klebsiella pneumoniae GN=katE PE=3 SV=1	50.6649	31	193	1	752	83.352	5.71	96.5	99.9	112	95.1	99.8	96.7
W1BDD2		Alcohol dehydrogenase OS=Klebsiella pneumoniae IS22 PE=3 SV=1	30.0595	8	109	1	336	35.357	6.38	118.5	83.2	77.5	96.5	114	110.3
A0A2G3RVH7	CS332_14055	Fructose-bisphosphate aldolase OS=Klebsiella pneumoniae subsp. pneumoniae GN=CS332_14055 PE=4 SV=1	43.4286	14	202	1	350	38.023	6.73	89.8	84.5	89.4	78.7	146.4	111.1
A0A170GC08	prlC	Oligopeptidase A OS=Klebsiella pneumoniae GN=prlC PE=3 SV=1	65.2941	44	140	1	680	76.669	5.29	100.5	103	103.1	99	105.3	89.2
W1AYL9		Ribosome hibernation protein YfiA OS=Klebsiella pneumoniae IS22 PE=4 SV=1	72.973	8	119	8	111	12.541	7.15	90.8	90.9	90.5	111.6	106.3	110
B5XNB6	rpoA	DNA-directed RNA polymerase subunit alpha OS=Klebsiella pneumoniae (strain 342) GN=rpoA PE=3 SV=1	90.5775	29	156	29	329	36.443	5.06	102	101.6	101.5	100.4	96.7	97.7
A0A1W2IHG9	narZ	Respiratory nitrate reductase subunit alpha OS=Klebsiella pneumoniae GN=narZ PE=3 SV=1	64.366	59	157	1	1246	139.736	6.71	83.2	90.7	98.7	117.7	105.5	104.3
A0A060VNJ2	uspE	UspE protein OS=Klebsiella pneumoniae GN=uspE PE=4 SV=1	72.4684	19	124	12	316	35.809	5.35	101.5	104.1	103	96.8	97	97.5
W1EEG6	rpsC	30S ribosomal protein S3 OS=Klebsiella pneumoniae IS53 GN=rpsC PE=3 SV=1	75.8621	19	128	19	232	25.823	10.3	102.2	101.3	101.1	99.3	94.7	101.4
A0A1B2ZX52	leuS	Leucine--tRNA ligase OS=Klebsiella pneumoniae GN=leuS PE=3 SV=1	66.9767	48	145	18	860	96.993	5.26	104.6	108.6	107.8	93.4	92.6	92.9
C8T5K7	nusA	Transcription termination/antitermination protein NusA OS=Klebsiella pneumoniae subsp. rhinoscleromatis ATCC 13884 GN=nusA PE=3 SV=1	67.0707	32	125	32	495	54.873	4.63	100.9	101	101.8	99.7	97.5	99
W1ARY6		Dihydrolipoyllysine-residue succinyltransferase component of 2-oxoglutarate dehydrogenase complex OS=Klebsiella pneumoniae IS22 PE=3 SV=1	45.679	18	139	1	405	43.984	5.81	86.4	98.9	100.1	103.2	116.2	95.2
J2E600	UUU_20580	Nitrate reductase, alpha subunit OS=Klebsiella pneumoniae subsp. pneumoniae DSM 30104 GN=UUU_20580 PE=3 SV=1	63.4831	58	155	1	1246	139.723	6.71	71.5	75.5	74.2	130.1	122.3	126.4
W1AU04	rplL	50S ribosomal protein L7/L12 OS=Klebsiella pneumoniae IS22 GN=rplL PE=3 SV=1	67.7686	8	115	1	121	12.288	4.65	80.6	107.2	120	98.8	103.3	90.2
A0A2D1J8C8	CR230_12220	Isoleucine--tRNA ligase OS=Klebsiella pneumoniae GN=CR230_12220 PE=4 SV=1	68.0171	48	157	1	938	104.458	5.88	41.2	38.6	39.8	160.4	150.4	169.5
A0A2D2JDZ9	CTI63_18725	Phosphoglucomutase, alpha-D-glucose phosphate-specific OS=Klebsiella pneumoniae GN=CTI63_18725 PE=4 SV=1	74.359	33	142	33	546	58.354	5.71	97.4	98.9	97.7	102.2	101.9	101.8
R4YI46	ftsH	ATP-dependent zinc metalloprotease FtsH OS=Klebsiella pneumoniae subsp. rhinoscleromatis SB3432 GN=ftsH PE=3 SV=1	65.0696	38	143	26	647	71.036	6.11	96.4	95.5	95	104.9	102.1	106
A0A168Q529	narZ	Respiratory nitrate reductase subunit alpha OS=Klebsiella pneumoniae GN=narZ PE=3 SV=1	63.9647	59	153	1	1246	139.736	6.71	96.5	106.4	94.5	92.1	119.5	91
A0A2G4Q2P1	glpK	Glycerol kinase OS=Klebsiella pneumoniae GN=glpK PE=4 SV=1	71.7694	33	96	23	503	56.122	5.81	94.6	92.4	92.4	106.8	108.4	105.4
R4Y5Y6	rpsB	30S ribosomal protein S2 OS=Klebsiella pneumoniae subsp. rhinoscleromatis SB3432 GN=rpsB PE=3 SV=1	83.4025	22	165	8	241	26.683	7.14	93.8	97	97.5	105.5	101.7	104.5
A0A2D2PIL0	proS	Proline--tRNA ligase OS=Klebsiella pneumoniae GN=proS PE=4 SV=1	74.3007	33	107	1	572	63.498	5.12	157.6	59.9	48.5	103.4	118	112.6
A0A0E1CI00	KPNJ1_03930	Peroxiredoxin OS=Klebsiella pneumoniae 30660/NJST258_1 GN=KPNJ1_03930 PE=4 SV=1	77.0053	16	154	16	187	20.75	5.17	85.5	83.2	83.5	118.6	111.2	117.9
A0A1W1J9M3	iolS_5	Oxidoreductase OS=Klebsiella pneumoniae GN=iolS_5 PE=4 SV=1	86.1111	21	121	2	324	36.12	5.14	116.6	120.7	121.4	80	82.6	78.8
A0A2A2T0Z7	galU	UTP--glucose-1-phosphate uridylyltransferase OS=Klebsiella pneumoniae GN=galU PE=3 SV=1	88	18	146	2	300	32.6	5.16	101.9	102.8	104.8	101.3	95.3	93.9
W1DJS7		Glutathione S-transferase, omega OS=Klebsiella pneumoniae IS43 PE=4 SV=1	66.7683	18	97	1	328	37.633	6.54	94.1	97.6	97.5	98.7	106.6	105.5
W8UN60	KPNJ2_00268	Universal stress protein OS=Klebsiella pneumoniae 30684/NJST258_2 GN=KPNJ2_00268 PE=3 SV=1	89.6552	8	149	8	145	16.171	5.16	94.8	99.9	99.9	105.3	96.5	103.6
A0A2G3RR03	rho	Transcription termination factor Rho OS=Klebsiella pneumoniae subsp. pneumoniae GN=rho PE=4 SV=1	66.3484	28	122	28	419	46.977	7.25	95	95.7	96.4	105.9	102.9	104.1
A6TEX1	rplD	50S ribosomal protein L4 OS=Klebsiella pneumoniae subsp. pneumoniae (strain ATCC 700721 / MGH 78578) GN=rplD PE=3 SV=1	62.6866	11	99	11	201	22.1	9.73	93.3	92.7	93.6	106.9	105.9	107.5
A0A0H3GMA7	KPHS_04190	Protein HflC OS=Klebsiella pneumoniae subsp. pneumoniae (strain HS11286) GN=KPHS_04190 PE=3 SV=1	67.0659	20	96	20	334	37.592	7.4	97.7	98.8	100.4	101.8	100.3	100.9
W8UJQ4	KPNJ2_02520	Quinone oxidoreductase OS=Klebsiella pneumoniae 30684/NJST258_2 GN=KPNJ2_02520 PE=4 SV=1	77.3913	18	76	1	345	37.168	6.1	87.5	91.9	94.4	112.8	107.2	106.3
A0A170D9W2	pckA_1	Phosphoenolpyruvate carboxykinase (ATP) OS=Klebsiella pneumoniae GN=pckA_1 PE=3 SV=1	67.6417	26	104	1	547	59.278	5.33	40.3	33	35.4	166.1	157.3	167.9
W9BHT8	pckA2	Phosphoenolpyruvate carboxykinase (ATP) OS=Klebsiella pneumoniae GN=pckA2 PE=3 SV=1	67.8245	27	108	2	547	59.247	5.39	113.2	127	124.4	78.5	78	79
Q93K40	acrB	Efflux pump membrane transporter OS=Klebsiella pneumoniae GN=acrB PE=3 SV=1	42.0802	33	136	23	1048	113.32	5.76	100.2	101.8	101.8	100.3	98.7	97.3
R4YII3	ygdH	YgdH protein OS=Klebsiella pneumoniae subsp. rhinoscleromatis SB3432 GN=ygdH PE=4 SV=1	72.7473	29	98	14	455	50.997	6.25	103.8	101.1	99.6	98.3	100.7	96.5
A0A2D2PP86	CR231_13120	3-deoxy-8-phosphooctulonate synthase OS=Klebsiella pneumoniae GN=CR231_13120 PE=4 SV=1	88.7324	22	113	1	284	30.821	6.32	38.6	42.7	34.2	160.2	166.4	157.8
W9BDM2	pfkA	ATP-dependent 6-phosphofructokinase OS=Klebsiella pneumoniae GN=pfkA PE=3 SV=1	88.75	24	115	14	320	34.962	6.02	102.9	104	104	96.3	95.9	96.9
A0A0J4R551	secB	Protein-export protein SecB OS=Klebsiella pneumoniae GN=secB PE=3 SV=1	60	5	61	5	155	17.179	4.32	95.9	94.2	95.4	102.8	106.9	104.9
W9BBW5	ugpB	Glycerol-3-phosphate ABC transporter OS=Klebsiella pneumoniae GN=ugpB PE=4 SV=1	74.4292	29	126	3	438	48.182	8.21	97.2	101.1	100.1	96	93.7	111.9
A0A0E1CKI5	KPNJ1_03433	3-oxoacyl-[acyl-carrier-protein] synthase 2 OS=Klebsiella pneumoniae 30660/NJST258_1 GN=KPNJ1_03433 PE=3 SV=1	81.8402	21	97	21	413	42.832	5.82	92.8	95.1	95.4	104	108.8	103.8
A0A2D2GRQ0	CTI55_16295	Ribonuclease E OS=Klebsiella pneumoniae GN=CTI55_16295 PE=4 SV=1	55.3389	46	135	1	1077	119.014	5.81	78.3	76.2	79.8	129.6	123.2	112.8
A0A098C847	rne	Ribonuclease E OS=Klebsiella pneumoniae GN=rne PE=3 SV=1	55.3389	46	131	1	1077	119.021	5.85	142.8	151.5	142.8	56.7	59.1	47.1
W1GJV7		Glutathione S-transferase, omega OS=Klebsiella pneumoniae ISC21 PE=4 SV=1	66.7683	18	90	1	328	37.663	6.54	132.6	135.3	130.9	59.6	74.5	67.2
A0A1S0WJV8	B1727_29245	Membrane-bound PQQ-dependent dehydrogenase, glucose/quinate/shikimate family OS=Klebsiella pneumoniae GN=B1727_29245 PE=4 SV=1	62.9397	40	160	40	796	86.395	6.16	110.8	112.7	111.9	87.9	88.2	88.5
W1B1N4		Acetyltransferase component of pyruvate dehydrogenase complex OS=Klebsiella pneumoniae IS22 PE=3 SV=1	34.6032	20	141	2	630	66.055	5.17	99.9	104.6	105.3	91.5	101.5	97.1
A6T7E5	rne	Ribonuclease E OS=Klebsiella pneumoniae subsp. pneumoniae (strain ATCC 700721 / MGH 78578) GN=rne PE=3 SV=1	53.8175	46	132	1	1074	118.65	5.72	93.4	83.2	94.1	106.8	101.3	121.3
A0A2G8AE55	C630_19720	50S ribosomal protein L3 OS=Klebsiella pneumoniae subsp. pneumoniae KpO3210 GN=C630_19720 PE=4 SV=1	70.3349	16	123	16	209	22.225	9.91	95.1	96.3	96.5	105.6	97.4	109.1
A0A181SNR9	valS	Valine--tRNA ligase OS=Klebsiella pneumoniae GN=valS PE=3 SV=1	64.0379	53	130	19	951	108.21	5.36	101.9	101.5	101.9	100.2	100.1	94.4
W8UG46	pckA	Phosphoenolpyruvate carboxykinase (ATP) OS=Klebsiella pneumoniae 30684/NJST258_2 GN=pckA PE=3 SV=1	67.6417	26	105	1	547	59.204	5.39	144.6	150.2	151	47.1	61.6	45.5
A0A2D2PKS8	CR231_06425	Aspartate/tyrosine/aromatic aminotransferase OS=Klebsiella pneumoniae GN=CR231_06425 PE=4 SV=1	68.6869	29	141	1	396	43.524	5.5	85.3	74.6	83.2	121.4	121.1	114.4
A0A1S9BLQ2	BU230_07805	L-threonine dehydrogenase OS=Klebsiella pneumoniae GN=BU230_07805 PE=4 SV=1	60.0515	23	134	23	388	41.632	6.33	37	34.7	37.1	169.3	156.5	165.4
A0A0E1CCA0	KPNJ1_02086	Cold shock protein OS=Klebsiella pneumoniae 30660/NJST258_1 GN=KPNJ1_02086 PE=4 SV=1	76.0563	5	160	5	71	7.657	7.24	89.6	91.7	93.8	107.2	104.7	112.9
A0A2D1HQ17	AN663_25300	5'-methylthioadenosine/S-adenosylhomocysteine nucleosidase OS=Klebsiella pneumoniae subsp. pneumoniae GN=AN663_25300 PE=4 SV=1	91.3793	13	85	2	232	24.475	5.4	88.8	101.3	96.7	105	99.1	108.9
A0A169D881	CR230_16620	Putative homeobox protein OS=Klebsiella pneumoniae GN=CR230_16620 PE=4 SV=1	47.1074	5	354	1	121	12.215	4.93	74.4	74.8	76.3	125.6	126.1	122.7
J2XDE7	UUU_01480	Entericidin B OS=Klebsiella pneumoniae subsp. pneumoniae DSM 30104 GN=UUU_01480 PE=4 SV=1	21.5909	1	40	1	88	9.106	7.34	121.5	126.8	129.6	73.9	71.2	77
A0A1L5ULB0	mukB	Chromosome partition protein MukB OS=Klebsiella pneumoniae GN=mukB PE=3 SV=1	54.386	65	134	65	1482	169.407	5.4	101.9	101.5	101.6	95.1	103.4	96.6
A0A060VKL9	KpST82_2657	Uncharacterized protein OS=Klebsiella pneumoniae GN=KpST82_2657 PE=4 SV=1	83.2817	21	112	2	323	34.871	6.01	99.7	103.9	104.5	96.9	92.6	102.4
A0A1Y0Q4H2	tpx	Thiol peroxidase OS=Klebsiella pneumoniae subsp. pneumoniae GN=tpx PE=3 SV=1	99.4048	11	87	9	168	17.533	4.88	101.4	100.5	101.9	97.9	99.2	99
A0A060VG41	KpST82_1603	Uncharacterized protein OS=Klebsiella pneumoniae GN=KpST82_1603 PE=3 SV=1	70.0935	24	117	23	428	46.509	8.63	96.7	97.8	97.5	104.9	102.1	101
A0A1W1KSV2	sdhB	Succinate dehydrogenase iron-sulfur subunit OS=Klebsiella pneumoniae GN=sdhB PE=3 SV=1	74.7899	18	136	2	238	26.733	6.52	99	98.3	98	104.8	107.4	92.5
A0A2G8AGC0	C630_18765	Glucuronate isomerase OS=Klebsiella pneumoniae subsp. pneumoniae KpO3210 GN=C630_18765 PE=4 SV=1	78.7234	32	127	3	470	53.748	6	90.8	92.4	91.2	106.5	112.9	106.3
A0A0E1C7M0	rplF	50S ribosomal protein L6 OS=Klebsiella pneumoniae 30660/NJST258_1 GN=rplF PE=3 SV=1	82.4859	13	113	1	177	18.832	9.7	95.3	83.4	82.9	111.3	114.5	112.6
A0A2G4PVL1	CS372_16805	Bifunctional glucose-1-phosphatase/inositol phosphatase OS=Klebsiella pneumoniae GN=CS372_16805 PE=4 SV=1	66.0241	27	136	1	415	45.548	7.39	118.1	113.7	127.9	78.6	82.9	78.7
W9BAJ4	mtlA	MtlA protein OS=Klebsiella pneumoniae GN=mtlA PE=4 SV=1	41.2598	21	107	4	635	67.689	6.55	108.7	110.4	113.3	89.9	91.2	86.5
C8T8D6	hup	DNA-binding protein HU OS=Klebsiella pneumoniae subsp. rhinoscleromatis ATCC 13884 GN=hup PE=3 SV=1	74.4444	8	96	1	90	9.471	9.58	98.4	104.3	108.3	102.1	86.2	100.7
W1B6A7		Aconitate hydratase OS=Klebsiella pneumoniae IS22 PE=3 SV=1	26.0382	22	114	2	891	97.586	5.88	85.2	86.9	81.4	117.6	124.4	104.6
A0A2G8AFF4	C630_21940	F0F1 ATP synthase subunit gamma OS=Klebsiella pneumoniae subsp. pneumoniae KpO3210 GN=C630_21940 PE=4 SV=1	87.8049	26	117	26	287	31.493	9.06	93	94.5	94.1	107.8	102.8	107.8
W1B305		Outer membrane lipoprotein pcp OS=Klebsiella pneumoniae IS22 PE=4 SV=1	77.4194	8	62	8	155	15.246	8.87	85.1	85.1	84.9	116.1	112.8	116.1
A0A2D2FBW2	CTI55_10290	Phenylalanine--tRNA ligase subunit beta OS=Klebsiella pneumoniae GN=CTI55_10290 PE=4 SV=1	70.4403	42	105	7	795	86.865	5.21	106.1	105.8	106.9	93	96.8	91.3
A0A1W1LM26	betB_3	5-carboxymethyl-2-hydroxymuconate semialdehyde dehydrogenase OS=Klebsiella pneumoniae GN=betB_3 PE=3 SV=1	78.4836	26	107	1	488	52.905	6.64	81.5	82.6	79.3	119.7	118.3	118.5
W1HV56	pepA	Probable cytosol aminopeptidase OS=Klebsiella pneumoniae IS39 GN=pepA PE=3 SV=1	66.4683	24	110	24	504	54.919	7.2	103.9	103.6	103.7	96.7	95.9	96.2
A0A2A2SUV2	guaA	GMP synthase [glutamine-hydrolyzing] OS=Klebsiella pneumoniae GN=guaA PE=3 SV=1	77.7143	35	96	5	525	58.754	5.5	109.4	111.3	114.4	89.1	87.4	88.5
C8TC58	rpsD	30S ribosomal protein S4 OS=Klebsiella pneumoniae subsp. rhinoscleromatis ATCC 13884 GN=rpsD PE=3 SV=1	67.4757	18	151	18	206	23.488	10.05	92.9	92.9	94.1	107.9	99.6	112.6
A0A1W1J5S3	pckA_1	Phosphoenolpyruvate carboxykinase (ATP) OS=Klebsiella pneumoniae GN=pckA_1 PE=3 SV=1	63.9854	25	101	2	547	59.293	5.39	112.3	89.9	121.1	91.7	81.2	103.8
A0A210UVI8	B4U21_31610	Maltose ABC transporter substrate-binding protein MalE OS=Klebsiella pneumoniae GN=B4U21_31610 PE=4 SV=1	75	28	146	8	396	43.246	8.03	81.1	82.6	82.1	122.6	113.3	118.3
A0A2A2NM94	mtnN	5'-methylthioadenosine/S-adenosylhomocysteine nucleosidase OS=Klebsiella pneumoniae GN=mtnN PE=3 SV=1	91.3793	13	79	2	232	24.547	5.27	117.2	116	116.7	76	85.2	88.9
A0A0J4XFS7	lsrF	3-hydroxy-5-phosphonooxypentane-2,4-dione thiolase OS=Klebsiella pneumoniae GN=lsrF PE=3 SV=1	90.8475	22	125	22	295	32.36	6.42	98.9	100.3	99.5	100.7	98.2	102.3
A0A0J4R4N7	argG	Argininosuccinate synthase OS=Klebsiella pneumoniae GN=argG PE=3 SV=1	72.0358	28	97	28	447	49.782	5.55	105.3	102.2	101.5	97.1	96.3	97.5
J2X728	zwf	Glucose-6-phosphate 1-dehydrogenase OS=Klebsiella pneumoniae subsp. pneumoniae DSM 30104 GN=zwf PE=3 SV=1	66.8024	33	118	13	491	55.836	5.87	104.8	106.2	105.2	93.9	97.8	92
A0A1B3A611	rplF	50S ribosomal protein L6 OS=Klebsiella pneumoniae GN=rplF PE=3 SV=1	82.4859	13	110	1	177	18.862	9.7	132.7	133.9	130.6	67.6	71.1	64.1
W9BHR9	prsA	Ribose-phosphate pyrophosphokinase OS=Klebsiella pneumoniae GN=prsA PE=3 SV=1	54.4118	15	99	15	340	36.992	5.96	96	96.8	96.8	103.3	104.1	102.9
A0A0C7KN36	prr	Gamma-aminobutyraldehyde dehydrogenase OS=Klebsiella pneumoniae GN=prr PE=3 SV=1	83.3684	24	88	7	475	50.466	6.2	114.7	119.7	119	79.8	84.7	82
W1B4P7		PTS system, mannose-specific IIA component / PTS system, mannose-specific IIB component OS=Klebsiella pneumoniae IS22 PE=4 SV=1	83.2817	21	102	2	323	34.872	6.01	118.1	129	126.3	77	73	76.7
A0A2D2FY06	hpaE	5-carboxymethyl-2-hydroxymuconate semialdehyde dehydrogenase OS=Klebsiella pneumoniae GN=hpaE PE=4 SV=1	78.4836	26	117	1	488	52.976	6.64
W1BJY6	deoB	Phosphopentomutase OS=Klebsiella pneumoniae IS22 GN=deoB PE=3 SV=1	55.5283	18	122	2	407	44.27	5.35	87.4	97.1	103.9	96	100.3	115.2
A0A170D762	malP_2	Alpha-1,4 glucan phosphorylase OS=Klebsiella pneumoniae GN=malP_2 PE=3 SV=1	55.4601	42	136	2	815	93.439	5.76	118.9	122.1	119.3	73.6	89.5	76.6
A0A0H3GM33	KPHS_06330	4-hydroxyphenylacetate catabolism OS=Klebsiella pneumoniae subsp. pneumoniae (strain HS11286) GN=KPHS_06330 PE=3 SV=1	78.4836	26	107	1	488	52.977	6.47
W1H3L4	atpF	ATP synthase subunit b OS=Klebsiella pneumoniae ISC21 GN=atpF PE=3 SV=1	75	20	117	20	156	17.364	5.8	97.2	98.3	99.1	102.9	101.8	100.6
A0A2G3RXI3	CS332_10235	DNA-binding protein HU-alpha OS=Klebsiella pneumoniae subsp. pneumoniae GN=CS332_10235 PE=4 SV=1	74.4444	8	87	1	90	9.515	9.58	166.9	107.1	88.5	66.9	99.2	71.3
A0A0V9RUE1	ndk	Nucleoside diphosphate kinase OS=Klebsiella pneumoniae GN=ndk PE=3 SV=1	64.3357	7	76	3	143	15.517	5.81	94.4	94	92.6	106.2	107.7	105.2
C8T0Y5	artJ	Lysine-arginine-ornithine-binding periplasmic protein OS=Klebsiella pneumoniae subsp. rhinoscleromatis ATCC 13884 GN=artJ PE=3 SV=1	82	22	152	2	250	27.625	8.31	98.2	103.3	102.9	104.4	94.2	97
A0A2A5IDW4	hpaE	5-carboxymethyl-2-hydroxymuconate semialdehyde dehydrogenase OS=Klebsiella pneumoniae subsp. pneumoniae GN=hpaE PE=3 SV=1	77.459	26	102	2	488	52.979	6.64	63	57.4	58.5	142.5	135.5	143
A0A2G4YJS6	CQB04_02150	DUF853 domain-containing protein OS=Klebsiella pneumoniae GN=CQB04_02150 PE=4 SV=1	70.6	24	91	1	500	54.146	5.96	88.3	93.9	91.8	108	126.6	91.4
B5XRE7	KPK_2945	Uncharacterized protein OS=Klebsiella pneumoniae (strain 342) GN=KPK_2945 PE=4 SV=1	49.9037	19	88	3	519	55.318	4.91	93.5	93.8	93.2	103.1	107.6	108.8
A0A1Y0Q4F3	B5K12_18150	Uncharacterized protein OS=Klebsiella pneumoniae subsp. pneumoniae GN=B5K12_18150 PE=4 SV=1	70.6	24	88	1	500	54.09	5.81	167	155.6	146.8	40.3	42.8	47.4
W1DG72		Aerobic respiration control protein arcA OS=Klebsiella pneumoniae IS43 PE=4 SV=1	65.1261	20	112	20	238	27.255	5.43	93.8	95.9	95.5	105.3	105.4	104.1
A0A0E1CH95	KPNJ1_02268	Phosphofructokinase OS=Klebsiella pneumoniae 30660/NJST258_1 GN=KPNJ1_02268 PE=3 SV=1	73.2258	15	91	2	310	32.581	5.72	100.6	105.5	105	101.9	91.4	95.6
A0A0W8AK44	lysS	Lysine--tRNA ligase OS=Klebsiella pneumoniae GN=lysS PE=3 SV=1	78.6139	36	135	12	505	57.51	5.2	95.9	99	100.1	103.3	101.6	100
W1DVK1		Bacterioferritin OS=Klebsiella pneumoniae IS46 PE=3 SV=1	72.1519	10	125	10	158	18.313	4.72	91.8	91.3	92.2	109.8	102.6	112.4
A0A2G8AR84	C630_11175	Transcriptional regulator OS=Klebsiella pneumoniae subsp. pneumoniae KpO3210 GN=C630_11175 PE=4 SV=1	65.9259	10	106	2	135	15.277	5.27	86.8	90.6	94.2	109.8	94.9	123.8
W8UX95	KPNJ2_03488	NAD(P)H dehydrogenase (quinone) OS=Klebsiella pneumoniae 30684/NJST258_2 GN=KPNJ2_03488 PE=3 SV=1	54.7264	11	109	11	201	21.288	6	102.4	98.1	97.2	102	99.2	101.1
A0A060VKB7	gcvP	Glycine dehydrogenase (decarboxylating) OS=Klebsiella pneumoniae GN=gcvP PE=3 SV=1	62.278	42	120	1	957	104.505	6.09	104.6	102.9	100.3	103	93.1	96.2
A0A098CI96	gcvP	Glycine dehydrogenase (decarboxylating) OS=Klebsiella pneumoniae GN=gcvP PE=3 SV=1	62.278	42	120	1	957	104.567	6	68.7	67.4	71.1	137.6	126.5	128.7
W1ECX0		Arginine ABC transporter, periplasmic arginine-binding protein ArtI OS=Klebsiella pneumoniae IS53 PE=3 SV=1	82	22	145	2	250	27.64	7.9	114.7	123.7	125.8	79.1	77.9	78.9
A0A0E1CFD0	upp	Uracil phosphoribosyltransferase OS=Klebsiella pneumoniae 30660/NJST258_1 GN=upp PE=3 SV=1	61.3793	16	78	16	290	31.848	9.35	97	98.2	99	104	102.6	99.3
A0A2G4Y8M6	CQB04_25820	Bifunctional glucose-1-phosphatase/inositol phosphatase OS=Klebsiella pneumoniae GN=CQB04_25820 PE=4 SV=1	61.4458	26	132	1	415	45.574	7.39	118.9	132.9	131.3	66.4	74	76.5
B5XTP1	ugpB	Glycerol-3-phosphate ABC transporter, periplasmic glycerol-3-phosphate-binding protein OS=Klebsiella pneumoniae (strain 342) GN=ugpB PE=4 SV=1	70.5479	29	115	3	438	48.211	8.21	125.6	132.3	130.4	68.6	71.9	71.2
A0A237PVG1	metG	Methionine--tRNA ligase OS=Klebsiella pneumoniae GN=metG PE=3 SV=1	57.7548	33	97	3	677	76.103	5.58	96.8	105.9	103.8	99.8	94.8	98.9
J2DMU3	betB	NAD/NADP-dependent betaine aldehyde dehydrogenase OS=Klebsiella pneumoniae subsp. pneumoniae DSM 30104 GN=betB PE=3 SV=1	60.4082	22	76	3	490	52.843	5.26	84.8	86.8	86.9	109.2	121.3	111
W1EHV6		Outer membrane protein F OS=Klebsiella pneumoniae IS53 PE=4 SV=1	69.1589	6	58	1	107	12.042	4.81	118.1	120.1	123	78.1	85	75.7
W1B2S7		ABC transporter, ATP-binding protein OS=Klebsiella pneumoniae IS22 PE=4 SV=1	44.7038	20	111	1	557	62.25	8.88	105.8	113	112.4	95.3	87.7	85.8
A0A231WLY0	B1727_14705	NAD-dependent phenylacetaldehyde dehydrogenase OS=Klebsiella pneumoniae GN=B1727_14705 PE=3 SV=1	81.3627	26	85	3	499	53.483	5.67	91.4	94.1	91.8	109.9	103.9	108.9
A0A1V0C4D6	carB	Carbamoyl-phosphate synthase large chain OS=Klebsiella pneumoniae GN=carB PE=3 SV=1	56.1453	46	89	40	1074	117.923	5.25	108.3	108.3	108.5	93	91.6	90.3
A0A0E1CMX4	KPNJ1_04288	Peptidylprolyl isomerase OS=Klebsiella pneumoniae 30660/NJST258_1 GN=KPNJ1_04288 PE=4 SV=1	68.7011	31	94	2	639	69.562	5.25	103.2	107.1	110.6	88.5	99.1	91.5
A0A2A2NN08	CKJ89_09765	Aldo/keto reductase OS=Klebsiella pneumoniae GN=CKJ89_09765 PE=4 SV=1	86.1111	22	121	1	324	36.146	5.14	132.8	141.4	155.9	52.6	67.3	50.1
A0A060VDM3	surA	Chaperone SurA OS=Klebsiella pneumoniae GN=surA PE=3 SV=1	65.6542	23	103	23	428	47.052	7.15	99.7	100.4	100.1	100.7	100.9	98.1
A0A231WM79	B1727_15380	Dipeptidyl carboxypeptidase II OS=Klebsiella pneumoniae GN=B1727_15380 PE=3 SV=1	56.3877	25	74	15	681	77.096	5.25	100.8	99	99.5	97.7	104.3	98.7
A0A164ZED5	ppiD	Peptidylprolyl isomerase OS=Klebsiella pneumoniae GN=ppiD PE=4 SV=1	70.3526	30	91	3	624	67.855	5.11	58.8	57.9	55.5	141.6	151.8	134.5
A0A060VKZ3	metH	Methionine synthase OS=Klebsiella pneumoniae GN=metH PE=4 SV=1	54.9722	51	101	51	1257	138.805	5.02	107.4	108	108.2	90.4	94	92
A0A2G4YJ38	CQB04_08800	NADP-dependent oxidoreductase OS=Klebsiella pneumoniae GN=CQB04_08800 PE=4 SV=1	77.3913	19	68	2	345	37.168	6.32	157.3	166	164.5	33.7	41.5	37.1
W1DXW2	metG	Methionine--tRNA ligase OS=Klebsiella pneumoniae IS46 GN=metG PE=3 SV=1	57.5	33	97	3	680	76.461	5.53	102.5	107.8	107.4	88.4	100.3	93.7
A0A1C3PKZ9	crr	PTS system protein OS=Klebsiella pneumoniae GN=crr PE=4 SV=1	66.8639	11	116	11	169	18.27	4.84	93.8	95.6	96.2	107.5	98.2	108.8
A0A0J5A1A3	SM87_04823	Phosphofructokinase OS=Klebsiella pneumoniae GN=SM87_04823 PE=3 SV=1	69.3548	14	94	1	310	32.524	5.71	103.1	106.9	111.3	96.2	91.7	90.8
A0A263K659	BB785_18070	Aminopeptidase N OS=Klebsiella pneumoniae GN=BB785_18070 PE=4 SV=1	53.6165	35	107	17	871	98.706	5.25	110.5	113.9	111.5	89.1	88.6	86.3
A0A0C7KAU0	polA	DNA polymerase I OS=Klebsiella pneumoniae GN=polA PE=3 SV=1	54.6237	42	99	42	930	103.176	5.41	101	101.1	100.8	97.3	101.8	97.9
W1ER63	proC	Pyrroline-5-carboxylate reductase OS=Klebsiella pneumoniae IS53 GN=proC PE=3 SV=1	68.2657	11	63	1	271	28.308	5.96	42.8	46.4	48.6	157.3	153.9	151
H6U1W5		TerZ OS=Klebsiella pneumoniae PE=4 SV=1	89.2857	16	73	4	196	21.226	5.94	112.9	115.7	114.1	86.2	86.3	84.8
A0A1Y0Q8Z9	B5K12_18135	Methylmalonate-semialdehyde dehydrogenase (CoA acylating) OS=Klebsiella pneumoniae subsp. pneumoniae GN=B5K12_18135 PE=4 SV=1	73.8523	22	76	1	501	53.561	5.9	77.7	83.4	82.6	113.2	127	116.1
A0A2A2NP31	CKJ89_10385	Lysine/arginine/ornithine ABC transporter substrate-binding protein ArgT OS=Klebsiella pneumoniae GN=CKJ89_10385 PE=3 SV=1	70.7692	19	81	17	260	28.12	7.14	115.7	119.5	117.9	82.6	84.3	80
A0A2G4YG36	gap	Type I glyceraldehyde-3-phosphate dehydrogenase OS=Klebsiella pneumoniae GN=gap PE=4 SV=1	73.7952	19	100	3	332	35.635	5.85	133.7	141.4	139.8	58.8	67.6	58.8
A6T4X9	bamA	Outer membrane protein assembly factor BamA OS=Klebsiella pneumoniae subsp. pneumoniae (strain ATCC 700721 / MGH 78578) GN=bamA PE=3 SV=1	66.6255	45	133	45	809	90.028	5.3	96.9	97.3	96.7	102.8	102.8	103.5
A0A2D2FM53	CTI55_01680	Maltodextrin phosphorylase OS=Klebsiella pneumoniae GN=CTI55_01680 PE=4 SV=1	64.6985	44	111	27	796	89.972	6.92	105.6	106.4	108.3	95.9	89.3	94.5
A0A2G5BNE7	CAK82_26040	N-succinylglutamate 5-semialdehyde dehydrogenase OS=Klebsiella pneumoniae GN=CAK82_26040 PE=4 SV=1	59.7561	22	83	3	492	52.15	6.34	117	119.1	119	78.5	81.6	84.8
A0A1Y0PWD7	grcA	Autonomous glycyl radical cofactor OS=Klebsiella pneumoniae subsp. pneumoniae GN=grcA PE=3 SV=1	87.4016	15	111	13	127	14.234	5.02	68.8	68	69.5	135.2	125.2	133.3
A0A2G3RX84	CS332_10115	Elongation factor Tu (Fragment) OS=Klebsiella pneumoniae subsp. pneumoniae GN=CS332_10115 PE=4 SV=1	70.2703	3	90	1	37	3.876	9.98	87.8	97.7	90.5	108.3	104.2	111.6
W1DNK1	deoC	Deoxyribose-phosphate aldolase OS=Klebsiella pneumoniae IS43 GN=deoC PE=3 SV=1	83.8346	20	92	20	266	28.517	5.29	97.1	99.1	99.1	103.6	99.4	101.6
A0A2G4XEI2	CPZ60_08180	Elongation factor Tu (Fragment) OS=Klebsiella pneumoniae GN=CPZ60_08180 PE=4 SV=1	78.8462	3	90	1	52	5.457	5.17	83.3	103.2	85.9	125.4	131.8	70.4
A0A060VK15	yqjD	YqjD protein OS=Klebsiella pneumoniae GN=yqjD PE=4 SV=1	57.4257	11	122	11	101	10.94	5.31	92.5	92.8	94.3	108.5	94.3	117.6
A0A1V7F7W6	B8011_08110	Elongation factor Tu OS=Klebsiella pneumoniae GN=B8011_08110 PE=4 SV=1	69.4444	3	90	1	36	3.718	9	103.8	99.7	96.2	92.4	105.4	102.5
A0A2D1HPM0	AN663_24235	Aldo/keto reductase OS=Klebsiella pneumoniae subsp. pneumoniae GN=AN663_24235 PE=4 SV=1	86.1111	22	120	1	324	36.162	5.14	126.6	122.5	125.1	62.6	90.5	72.8
W1HXU3		Endoribonuclease L-PSP OS=Klebsiella pneumoniae IS39 PE=4 SV=1	87.5	7	71	6	128	13.581	5.21	94.6	97.1	94.7	104.3	103.6	105.7
J2XCW1	UUU_02360	Methylmalonate-semialdehyde dehydrogenase OS=Klebsiella pneumoniae subsp. pneumoniae DSM 30104 GN=UUU_02360 PE=4 SV=1	73.8523	22	73	1	501	53.562	5.8	92.9	82.6	95.8	110.5	112.1	106.2
R4YA20	rplJ	50S ribosomal protein L10 OS=Klebsiella pneumoniae subsp. rhinoscleromatis SB3432 GN=rplJ PE=3 SV=1	60	11	75	11	165	17.789	8.98	95.7	96.2	95.8	105.1	101.4	105.8
C8T5X6	fumB	Fumarate hydratase class I OS=Klebsiella pneumoniae subsp. rhinoscleromatis ATCC 13884 GN=fumB PE=3 SV=1	75.365	31	108	1	548	59.851	6.27	112.1	119.6	118.4	83.9	84.4	81.6
A0A229UZQ3	CEO55_26305	Elongation factor Tu (Fragment) OS=Klebsiella pneumoniae GN=CEO55_26305 PE=4 SV=1	80	3	90	1	55	5.728	5.17	90.6	101.8	99.7	106	103.1	98.9
A0A0E1CKX1	lamB	Maltoporin OS=Klebsiella pneumoniae 30660/NJST258_1 GN=lamB PE=2 SV=1	75.1121	23	108	14	446	49.795	5.21	92.2	92.7	92.7	109.2	107.3	106
A0A1C3QZB4	tuf1_2	Elongation factor Tu OS=Klebsiella pneumoniae GN=tuf1_2 PE=4 SV=1	73.3333	3	90	1	45	4.704	8.84	98.3	101.2	110.4	99.9	97.6	92.6
A0A2D1HD86	gyrB	DNA topoisomerase (ATP-hydrolyzing) subunit B OS=Klebsiella pneumoniae subsp. pneumoniae GN=gyrB PE=4 SV=1	63.0597	49	118	2	804	90.015	6.14	109.1	101.6	100.5	94.1	102.2	92.4
C8T296	pyrG	CTP synthase OS=Klebsiella pneumoniae subsp. rhinoscleromatis ATCC 13884 GN=pyrG PE=3 SV=1	76.8807	31	109	11	545	60.125	5.86	100.6	103.8	104.9	95.7	97.7	97.2
A0A0C7KLE9	aceB	Malate synthase OS=Klebsiella pneumoniae GN=aceB PE=3 SV=1	61.7261	26	85	26	533	60.207	5.66	120.1	123.5	122.3	75.8	81.5	76.8
A0A0J4Y0U6	gmhA	Phosphoheptose isomerase OS=Klebsiella pneumoniae GN=gmhA PE=3 SV=1	83.9378	13	69	13	193	20.917	6.2	102.2	97.7	98.2	101.9	100.2	99.8
A0A181UVK2	rnr	Ribonuclease R OS=Klebsiella pneumoniae GN=rnr PE=3 SV=1	61.1111	39	109	5	810	91.744	8.37	105.8	103.9	100.5	95.4	100.3	94.2
A0A0J4V9D4	rplA	50S ribosomal protein L1 OS=Klebsiella pneumoniae GN=rplA PE=3 SV=1	59.4017	20	122	1	234	24.616	9.57	83.5	88.5	87.1	105.6	127.4	108
A0A2G3RTK7	CS332_18350	NADH-quinone oxidoreductase subunit NuoG OS=Klebsiella pneumoniae subsp. pneumoniae GN=CS332_18350 PE=4 SV=1	34.0308	28	97	5	908	99.896	6.21	101.1	95.8	96.2	99.8	104.4	102.8
A0A2G3RVI5	CS332_18420	Phosphate acetyltransferase OS=Klebsiella pneumoniae subsp. pneumoniae GN=CS332_18420 PE=4 SV=1	34.9229	20	111	2	713	76.883	5.4	84.4	86.2	85.9	117.3	113.3	112.9
R4Y3Y9	fdoG	FdoG protein OS=Klebsiella pneumoniae subsp. rhinoscleromatis SB3432 GN=fdoG PE=3 SV=1	67.9134	47	108	1	1016	112.315	7.42	99.8	101.6	97	104.1	97.9	99.6
A0A2D2PLH2	astD	Succinylglutamate-semialdehyde dehydrogenase OS=Klebsiella pneumoniae GN=astD PE=4 SV=1	59.7561	22	82	3	492	52.166	6.34	112.1	109.4	105.7	90.5	83.3	99
A0A2G3RZG7	CS332_06370	NADP-dependent oxaloacetate-decarboxylating malate dehydrogenase OS=Klebsiella pneumoniae subsp. pneumoniae GN=CS332_06370 PE=4 SV=1	38.2082	23	107	6	759	81.948	5.67	101.7	103.3	101.7	91.5	111.3	90.6
A0A0J4XE65	B1727_04100	PTS mannitol transporter subunit IICBA OS=Klebsiella pneumoniae GN=B1727_04100 PE=4 SV=1	40.1575	19	95	2	635	67.647	6.43	123.5	124	122.7	75.5	84	70.3
A0A085DIY0	speA	Biosynthetic arginine decarboxylase OS=Klebsiella pneumoniae GN=speA PE=3 SV=1	56.231	27	101	1	658	73.751	4.92	119.9	107.5	106.1	86.5	95.3	84.7
A0A2D3CSH9	KPH11_06585	Type I glyceraldehyde-3-phosphate dehydrogenase OS=Klebsiella pneumoniae subsp. pneumoniae GN=KPH11_06585 PE=4 SV=1	73.7952	19	85	3	332	35.65	5.68	77.7	80.9	82.2	124.5	115.8	118.8
A0A1W1KMS6	ileS	Isoleucine--tRNA ligase OS=Klebsiella pneumoniae GN=ileS PE=3 SV=1	58.5263	43	146	2	950	105.76	6.14	100.2	101.5	97.4	105.6	96.5	98.8
W9B309	degQ	Periplasmic serine endoprotease DegP-like OS=Klebsiella pneumoniae GN=degQ PE=3 SV=1	72.7473	27	109	27	455	47.241	6.29	99	101.3	100.8	100	98.2	100.7
A0A2G4YHJ2	gyrB	DNA topoisomerase (ATP-hydrolyzing) subunit B OS=Klebsiella pneumoniae GN=gyrB PE=4 SV=1	63.0597	48	114	1	804	90.049	6.07	97.2	99.5	102.8	108.9	90.9	100.8
A0A2A5NML0	proC	Pyrroline-5-carboxylate reductase OS=Klebsiella pneumoniae GN=proC PE=3 SV=1	68.7732	11	54	1	269	28.019	6.34	17	42.1	28	181.2	169.2	162.5
A0A291WMK3	fdnG	Formate dehydrogenase-N subunit alpha OS=Klebsiella pneumoniae GN=fdnG PE=3 SV=1	67.9134	47	107	1	1016	112.286	7.3	87.1	98.9	113.2	97.3	92.9	110.5
A0A1Y0PZG0	B5K12_23360	3-oxoadipyl-CoA thiolase OS=Klebsiella pneumoniae subsp. pneumoniae GN=B5K12_23360 PE=3 SV=1	78.0549	19	55	7	401	42.085	6.11	109.8	109.7	110	88	94.5	88
W1AMT7		Type I secretion outer membrane protein, TolC OS=Klebsiella pneumoniae IS22 PE=4 SV=1	27.1805	11	57	1	493	53.708	5.66
A0A0G3F398	galF	GalF UDP-glucose pyrophosphorylase OS=Klebsiella pneumoniae GN=galF PE=4 SV=1	71.8121	17	117	1	298	32.835	5.74	132.4	140.9	142.5	43.8	103.9	36.5
W1DH29		Biotin carboxylase of acetyl-CoA carboxylase OS=Klebsiella pneumoniae IS43 PE=4 SV=1	60.3486	26	113	2	459	50.249	7.53	79.1	72.7	67.7	125.5	135.7	119.2
A0A0H3GVX9	nadE	NH(3)-dependent NAD(+) synthetase OS=Klebsiella pneumoniae subsp. pneumoniae (strain HS11286) GN=nadE PE=3 SV=1	89.0909	18	84	3	275	30.47	5.58	107.2	105.8	106.6	96.7	90.7	93
A0A2G4PPX7	hpaE	5-carboxymethyl-2-hydroxymuconate semialdehyde dehydrogenase OS=Klebsiella pneumoniae GN=hpaE PE=4 SV=1	78.2787	25	109	1	488	52.993	6.47	101.5	106	107.3	95	103.3	87
A0A2G3RYI8	CS332_08310	Outer membrane channel protein TolC OS=Klebsiella pneumoniae subsp. pneumoniae GN=CS332_08310 PE=4 SV=1	27.8226	11	55	1	496	53.872	5.67	98.6	96.7	101.4	110.2	92.9	100.2
A0A0E1CH46	hutU	Urocanate hydratase OS=Klebsiella pneumoniae 30660/NJST258_1 GN=hutU PE=3 SV=1	57.2917	23	103	4	576	63.142	6.54	94.6	96.9	95.7	103.3	104.3	105.2
A0A2D1HL99	AN663_17680	Fumarate hydratase OS=Klebsiella pneumoniae subsp. pneumoniae GN=AN663_17680 PE=4 SV=1	75.365	31	109	1	548	59.869	6.27	40.7	47.1	44.2	155.7	155.5	156.8
A0A2G8ABH6	C630_24515	Fructose-bisphosphatase OS=Klebsiella pneumoniae subsp. pneumoniae KpO3210 GN=C630_24515 PE=4 SV=1	65.9639	19	98	19	332	36.724	5.97	102.7	105.2	105	97.3	95.2	94.5
W1DFB1		Small HspC2 heat shock protein OS=Klebsiella pneumoniae IS43 PE=3 SV=1	80.4233	18	109	15	189	21.493	5.49	35.5	32.3	34.1	170.1	162.6	165.5
W1BAM1		Enoyl-[acyl-carrier-protein] reductase [NADH] OS=Klebsiella pneumoniae IS22 PE=3 SV=1	60.687	15	87	15	262	27.893	5.64	101.5	97.9	99.3	100.3	102.3	98.7
W1HU41		Manganese ABC transporter, periplasmic-binding protein SitA OS=Klebsiella pneumoniae IS39 PE=3 SV=1	89.0805	15	109	2	174	19.623	8.31	126.9	123.3	123.4	71.5	84.8	70.1
A0A1W1L551	ppiD	Peptidylprolyl isomerase OS=Klebsiella pneumoniae GN=ppiD PE=4 SV=1	58.4936	29	82	1	624	67.793	5.22	98.5	103	103.8	94.8	101.3	98.5
A0A1Y0Q488	AN663_21705	Molybdate ABC transporter substrate-binding protein OS=Klebsiella pneumoniae subsp. pneumoniae GN=AN663_21705 PE=4 SV=1	81.323	19	85	1	257	26.948	8.06	112.3	124.2	118	84.2	76.7	84.7
A0A2A2NIA5	CKJ89_27055	Serine endoprotease (Fragment) OS=Klebsiella pneumoniae GN=CKJ89_27055 PE=4 SV=1	58.1882	17	96	1	287	29.635	8.75	158.2	154.7	161.9	42.5	45.9	36.8
W8V261	KPNJ2_05250	Uroporphyrin-III C-methyltransferase OS=Klebsiella pneumoniae 30684/NJST258_2 GN=KPNJ2_05250 PE=4 SV=1	79.3451	28	89	3	397	43.267	4.83	105.5	107.5	103.3	86.8	107.7	89.3
A0A060VQG2	feaB	FeaB protein OS=Klebsiella pneumoniae GN=feaB PE=3 SV=1	77.3547	25	79	2	499	53.541	5.67	85.4	79.7	85.1	113.6	127.9	108.2
A0A1Y0Q332	AN663_21210	Glutathione ABC transporter substrate-binding protein GsiB OS=Klebsiella pneumoniae subsp. pneumoniae GN=AN663_21210 PE=4 SV=1	68.4211	26	92	2	513	56.407	8.76	113.3	125	126.1	80.6	77	78
A0A164PGX0	eco	Ecotin OS=Klebsiella pneumoniae GN=eco PE=3 SV=1	71.7791	14	99	3	163	17.998	7.84	75.9	77.7	79.2	128.5	117.9	120.8
A6TED1	uxaC	Uronate isomerase OS=Klebsiella pneumoniae subsp. pneumoniae (strain ATCC 700721 / MGH 78578) GN=uxaC PE=3 SV=1	78.5408	31	121	2	466	53.282	5.9	74.3	79.5	77.8	131.7	113.4	123.3
A0A0V9HZE2	hslU	ATP-dependent protease ATPase subunit HslU OS=Klebsiella pneumoniae GN=hslU PE=3 SV=1	68.9189	31	110	31	444	49.672	5.47	98.5	100.1	99.6	101.1	100.1	100.6
A0A1Y0PVN6	B5K12_09140	Beta-glucosidase OS=Klebsiella pneumoniae subsp. pneumoniae GN=B5K12_09140 PE=3 SV=1	64.4444	37	82	6	765	83.347	6.28	103.9	102.1	106.6	96.6	98.2	92.6
W1E7A8	tolB	Protein TolB OS=Klebsiella pneumoniae IS46 GN=tolB PE=3 SV=1	57.7726	16	115	16	431	46.015	8.22	101.2	98.8	99.4	100	102.5	98.1
A0A2G3RSX1	CS332_18415	Acetate kinase OS=Klebsiella pneumoniae subsp. pneumoniae GN=CS332_18415 PE=4 SV=1	41.25	12	77	1	400	43.214	6.38	105.6	104.1	104	92.8	101.4	92.1
A0A1S9BQR2	BU230_00040	Peptidoglycan-binding protein LysM OS=Klebsiella pneumoniae GN=BU230_00040 PE=4 SV=1	40.2685	6	103	3	149	15.873	6.33	70.8	65.5	65.7	134.7	125.1	138.2
A0A1C3PPR2	agp_1	Bifunctional glucose-1-phosphatase/inositol phosphatase OS=Klebsiella pneumoniae GN=agp_1 PE=4 SV=1	54.2169	19	100	3	415	45.519	6.33	104	109	115.3	91.7	96.4	83.7
A0A1W1JYP6	galU	UTP--glucose-1-phosphate uridylyltransferase OS=Klebsiella pneumoniae GN=galU PE=3 SV=1	88	18	134	2	300	32.586	5.24	93.2	93.2	105.3	97.1	79.7	131.5
A0A1L5DRM2	B8011_07025	Protein HflK OS=Klebsiella pneumoniae GN=B8011_07025 PE=3 SV=1	64.2857	23	110	23	420	45.54	6.25	102.1	101.5	101.2	100	98.4	96.8
A0A2A2NLV7	CKJ89_13455	Beta-glucosidase OS=Klebsiella pneumoniae GN=CKJ89_13455 PE=3 SV=1	66.8885	29	71	1	601	65.353	6.89	85.9	79.7	81.6	85.9	158.2	108.8
A0A0W8AU98	maeA	NAD-dependent malic enzyme OS=Klebsiella pneumoniae GN=maeA PE=3 SV=1	71.6814	28	70	28	565	62.732	5.49	97.2	98.2	95.9	104.1	103.5	101.2
R4Y502	rplV	50S ribosomal protein L22 OS=Klebsiella pneumoniae subsp. rhinoscleromatis SB3432 GN=rplV PE=3 SV=1	72.7273	12	117	12	110	12.189	10.18	97.9	99.3	100.4	102.6	98.6	101.1
A0A231WRP8	gltX	Glutamate--tRNA ligase OS=Klebsiella pneumoniae GN=gltX PE=3 SV=1	75	28	91	28	472	53.538	6.01	105.5	105.3	105.2	94.3	95.7	94
A0A1S8Y631	lysS	Lysine--tRNA ligase OS=Klebsiella pneumoniae GN=lysS PE=3 SV=1	66.9307	34	123	9	505	57.627	5.27	95.2	98.6	98.3	107.2	99.8	100.9
A0A060VFC1	modA	ModA protein OS=Klebsiella pneumoniae GN=modA PE=4 SV=1	81.323	19	83	1	257	26.961	8.06	182.5	160.1	159	32.3	34	32
A0A2A5I9T7	CI704_25525	Uncharacterized protein OS=Klebsiella pneumoniae subsp. pneumoniae GN=CI704_25525 PE=4 SV=1	45.7853	55	98	55	1649	178.917	5.33	93.8	93.9	92.9	104.9	108.3	106.3
W8UWF2	hisS	Histidine--tRNA ligase OS=Klebsiella pneumoniae 30684/NJST258_2 GN=hisS PE=3 SV=1	80.8962	25	72	1	424	47.027	5.55	89.2	94.4	95	108.4	106	107
A0A060VG51	KpST82_1586	Uncharacterized protein OS=Klebsiella pneumoniae GN=KpST82_1586 PE=4 SV=1	54.1568	22	114	6	421	47.257	5.72	155	152.6	149.2	45.1	51.4	46.7
A0A2D2EP40	CTI52_25975	Xaa-Pro dipeptidase OS=Klebsiella pneumoniae GN=CTI52_25975 PE=4 SV=1	60.9481	20	88	3	443	50.129	6.13	99.3	92.2	93.9	100.7	111.6	102.3
A0A0E1CHV5	nagB	Glucosamine-6-phosphate deaminase OS=Klebsiella pneumoniae 30660/NJST258_1 GN=nagB PE=3 SV=1	66.5414	13	114	13	266	29.665	7.01	109.4	109.2	107.3	91.7	91.8	90.6
A0A1W1LBZ1	galF	UDP-glucose pyrophosphorylase OS=Klebsiella pneumoniae GN=galF PE=4 SV=1	71.8121	17	111	1	298	32.821	5.97	102.7	101.3	96.2	99.7	95.9	104.2
W1H124		Phenylacetate-CoA oxygenase/reductase, PaaK subunit OS=Klebsiella pneumoniae ISC21 PE=4 SV=1	54.5648	21	87	0	471	51.432	7.05
A0A1W1KAB5	narZ	Respiratory nitrate reductase subunit alpha OS=Klebsiella pneumoniae GN=narZ PE=3 SV=1	49.4382	47	126	1	1246	139.648	6.65	129.8	129.7	130.7	62.8	81	66.1
A0A0H3H0S0	KPHS_36310	Glycine betaine/choline ABC transporter membrane protein OS=Klebsiella pneumoniae subsp. pneumoniae (strain HS11286) GN=KPHS_36310 PE=4 SV=1	77.0492	15	73	15	305	32.851	6.11	99.9	101.1	100.8	98.6	98.4	101.2
W1EL08		Aminoacyl-histidine dipeptidase (Peptidase D) OS=Klebsiella pneumoniae IS53 PE=4 SV=1	61.0309	26	115	1	485	52.373	5.44	148.4	160.7	159.1	38.9	50.2	42.6
A0A2G3RZA0	tal	Transaldolase OS=Klebsiella pneumoniae subsp. pneumoniae GN=tal PE=4 SV=1	35.443	11	97	1	316	35.639	6.65	151.6	111.2	103.7	74.2	80.6	78.7
A0A2G3S291	CS332_05375	S-ribosylhomocysteine lyase OS=Klebsiella pneumoniae subsp. pneumoniae GN=CS332_05375 PE=4 SV=1	61.9883	7	69	2	171	19.327	5.71	67.4	63	57.8	152.7	117.4	141.6
A0A1Y0PZH2	B5K12_23410	Bifunctional aldehyde dehydrogenase/enoyl-CoA hydratase OS=Klebsiella pneumoniae subsp. pneumoniae GN=B5K12_23410 PE=4 SV=1	47.8708	25	86	1	681	72.902	6.58	154.6	156	158.1	34.9	58.3	38
A0A2G3RXK4	rpsB	30S ribosomal protein S2 OS=Klebsiella pneumoniae subsp. pneumoniae GN=rpsB PE=4 SV=1	73.444	15	121	1	241	26.728	7.14	108.4	95.5	97.6	93.1	106.3	99.1
A0A0J4N260	dkgA	2,5-didehydrogluconate reductase A OS=Klebsiella pneumoniae GN=dkgA PE=4 SV=1	55.2727	16	115	2	275	30.708	6.67	117.9	89.7	90.1	102.4	103.4	96.5
A0A1Y0Q5R1	asnS	Asparagine--tRNA ligase OS=Klebsiella pneumoniae subsp. pneumoniae GN=asnS PE=3 SV=1	61.3734	27	95	27	466	52.462	5.29	103.3	102.3	101.7	98.3	97.4	96.9
B5XXH6	acpP	Acyl carrier protein OS=Klebsiella pneumoniae (strain 342) GN=acpP PE=3 SV=1	42.3077	4	92	1	78	8.634	4.06	94.8	92.7	92.5	106.9	108.6	104.5
A0A1B2ZW05	BCB67_23020	Cytosol nonspecific dipeptidase OS=Klebsiella pneumoniae GN=BCB67_23020 PE=4 SV=1	56.701	26	114	4	485	52.316	5.43	100.8	103.3	102.4	98.2	100.1	95.2
A0A0J4X4R3	bglX	Beta-D-glucoside glucohydrolase OS=Klebsiella pneumoniae GN=bglX PE=3 SV=1	60.915	36	83	2	765	83.326	6.28	95.4	94.3	92.1	103.2	107.5	107.5
B5XNE2	accC	Acetyl-CoA carboxylase, biotin carboxylase OS=Klebsiella pneumoniae (strain 342) GN=accC PE=4 SV=1	61.6927	26	110	2	449	49.297	6.95	127.7	122.9	130.4	67.3	86.1	65.6
A0A170KPX7	speA	Biosynthetic arginine decarboxylase OS=Klebsiella pneumoniae GN=speA PE=3 SV=1	56.231	27	97	1	658	73.779	4.92	41.7	38.9	40.4	164	148.2	166.8
V0APW4	frr	Ribosome-recycling factor OS=Klebsiella pneumoniae 909957 GN=frr PE=3 SV=1	49.7297	11	64	11	185	20.618	6.89	94.3	97.4	98	104.9	101.2	104.2
A0A0E1C7C8	rpsL	30S ribosomal protein S12 OS=Klebsiella pneumoniae 30660/NJST258_1 GN=rpsL PE=3 SV=1	47.5806	6	66	6	124	13.743	10.87	103.8	101.6	101.9	97.3	98	97.4
A0A0E1C7S1	glmM	Phosphoglucosamine mutase OS=Klebsiella pneumoniae 30660/NJST258_1 GN=glmM PE=3 SV=1	72.1348	25	77	1	445	47.875	6.06	91.5	88.4	90	112.1	106.2	111.8
R4Y600	pepD	PepD protein OS=Klebsiella pneumoniae subsp. rhinoscleromatis SB3432 GN=pepD PE=4 SV=1	61.0309	26	114	1	485	52.444	5.52	49.8	50.3	53	150.1	148.6	148.1
W1AVU2	tal	Transaldolase OS=Klebsiella pneumoniae IS22 GN=tal PE=3 SV=1	38.9241	11	99	2	316	35.636	6.27	115.9	118.4	116.2	87.1	79.4	83
A0A0E1CEW6	bamC	Outer membrane protein assembly factor BamC OS=Klebsiella pneumoniae 30660/NJST258_1 GN=bamC PE=3 SV=1	67.5362	19	71	1	345	37.243	7.33	87.6	83.9	85.5	112.7	120.2	110.1
J2E271	dld	Quinone-dependent D-lactate dehydrogenase OS=Klebsiella pneumoniae subsp. pneumoniae DSM 30104 GN=dld PE=3 SV=1	80.7882	42	113	28	609	68.829	6.79	98.4	99.1	99.4	101.3	102.5	99.2
A0A1S9BQ54	sthA	Soluble pyridine nucleotide transhydrogenase OS=Klebsiella pneumoniae GN=sthA PE=3 SV=1	79.6137	22	84	17	466	51.5	6.55	107.3	112.8	112.1	87.1	91.6	89.1
A0A0J5B340	SM87_00071	Maltose-binding periplasmic protein OS=Klebsiella pneumoniae GN=SM87_00071 PE=4 SV=1	60.6061	24	125	4	396	43.096	8.41	82.1	85.9	84.5	117.8	115.2	114.5
A0A2D1J0W3	deoA	Thymidine phosphorylase OS=Klebsiella pneumoniae GN=deoA PE=4 SV=1	75.4545	26	71	5	440	47.089	5.17	99.6	99.7	100.1	99.8	99.9	100.8
A0A170A316	hemX	Uroporphyrinogen-III C-methyltransferase OS=Klebsiella pneumoniae GN=hemX PE=4 SV=1	80.1527	28	91	3	393	42.85	4.86	96.3	94.4	98.2	103.6	104.6	102.9
A0A2D2EI55	paaN	Bifunctional aldehyde dehydrogenase/enoyl-CoA hydratase OS=Klebsiella pneumoniae GN=paaN PE=4 SV=1	47.8708	25	82	1	681	72.855	6.58	123.4	133	136.1	51.3	62.8	93.4
A0A1W1K5U6	sdhB	Succinate dehydrogenase iron-sulfur subunit OS=Klebsiella pneumoniae GN=sdhB PE=3 SV=1	74.7899	18	121	2	238	26.692	6.52	92.6	102.7	102.8	106.4	102.3	93.1
W1AR82	tal	Transaldolase OS=Klebsiella pneumoniae IS22 GN=tal PE=3 SV=1	52.0505	17	101	2	317	35.227	5.21	91.4	102.9	102.4	96.5	114.3	92.5
W1H1A4	glmM	Phosphoglucosamine mutase OS=Klebsiella pneumoniae ISC21 GN=glmM PE=3 SV=1	71.6854	25	77	1	445	47.894	6.1	125.7	127	127	73.5	70.5	76.3
A0A0J4RTX9	SM87_01598	Lipoprotein OS=Klebsiella pneumoniae GN=SM87_01598 PE=4 SV=1	66.6667	7	85	1	171	18.547	7.06	105.6	98.5	97.4	98.7	103.3	96.5
W8UUU7	KPNJ2_00912	Transketolase OS=Klebsiella pneumoniae 30684/NJST258_2 GN=KPNJ2_00912 PE=3 SV=1	53.4188	31	128	28	702	76.411	6.47	101	100.9	101.4	99	99.6	98.1
W1H4Z2		Biotin carboxylase of acetyl-CoA carboxylase OS=Klebsiella pneumoniae ISC21 PE=4 SV=1	61.6927	25	108	1	449	49.24	6.67	210.3	153.5	141.1	39.2	36	19.9
W1AV67		DNA-binding protein HU-alpha OS=Klebsiella pneumoniae IS22 PE=3 SV=1	65.5556	6	60	1	90	9.529	9.58	115.2	108.6	108.4	82.4	98.6	86.8
W9BA07	thrS	Threonine--tRNA ligase OS=Klebsiella pneumoniae GN=thrS PE=3 SV=1	73.676	44	136	15	642	73.89	6.23	101.4	104.1	105.1	96.6	96.8	96.1
A0A170T0B8	paaZ	Bifunctional aldehyde dehydrogenase/enoyl-CoA hydratase OS=Klebsiella pneumoniae GN=paaZ PE=4 SV=1	49.0455	25	86	1	681	72.881	6.61	101.4	99.2	93.2	95.6	105.9	104.8
A0A2D0AWP1	B5K12_18880	Tellurium resistance protein TerZ OS=Klebsiella pneumoniae subsp. pneumoniae GN=B5K12_18880 PE=4 SV=1	92.7835	16	69	4	194	21.022	6.39	131.2	136.9	132.6	64.2	73.8	61.4
A0A0C7KJC2	yhdN_3	General stress protein 69 OS=Klebsiella pneumoniae GN=yhdN_3 PE=4 SV=1	75.3943	15	56	15	317	34.133	6.15	89.3	89.4	90.4	109.9	110.9	110.1
W1EP61		Probable secreted protein OS=Klebsiella pneumoniae IS53 PE=4 SV=1	47.1074	5	301	1	121	12.229	4.93	121.1	125.9	124	76	78.6	74.4
W9BIY6	accA	Acetyl-coenzyme A carboxylase carboxyl transferase subunit alpha OS=Klebsiella pneumoniae GN=accA PE=3 SV=1	84.6395	25	75	25	319	35.289	5.66	98.5	100.4	100	100.4	101.4	99.4
A0A0C7KL19	qorA_1	Quinone oxidoreductase OS=Klebsiella pneumoniae GN=qorA_1 PE=4 SV=1	76.7584	23	82	1	327	35.193	6.89	146.7	151.9	145.8	44.1	68.6	42.9
A0A1B2ZR31	glmM	Phosphoglucosamine mutase OS=Klebsiella pneumoniae GN=glmM PE=3 SV=1	72.1348	25	76	1	445	47.861	6.06	127.2	121	122.8	79	76.3	73.7
A0A0J4QLD2	guaA_2	GMP synthase [glutamine-hydrolyzing] OS=Klebsiella pneumoniae GN=guaA_2 PE=3 SV=1	69.7143	31	83	1	525	58.841	5.5	106.2	107.5	108.7	81.9	101.6	94
W1AZH0		18K peptidoglycan-associated outer membrane lipoprotein Peptidoglycan-associated lipoprotein Outer membrane protein P6 OmpA/MotB OS=Klebsiella pneumoniae IS22 PE=3 SV=1	38.7283	6	103	1	173	18.812	6.8	98.4	95.9	98.5	91.7	98.1	117.5
A0A2D2PKK1	CR231_06105	Lipoprotein OS=Klebsiella pneumoniae GN=CR231_06105 PE=4 SV=1	66.6667	7	81	1	171	18.553	7.06	55.4	55.3	55.3	138.8	146.5	148.8
W1BAK6	purL	Phosphoribosylformylglycinamidine synthase OS=Klebsiella pneumoniae IS22 GN=purL PE=3 SV=1	56.834	50	80	3	1295	140.795	5.39	55.3	58.7	59.4	137.2	141.5	147.9
A0A0T5IEX1	AGG09_06960	Phosphosugar isomerase OS=Klebsiella pneumoniae GN=AGG09_06960 PE=4 SV=1	57.0122	15	82	15	328	36.697	6.7	85.7	83.8	82	117.4	115.5	115.6
A0A2G3RTD6	pckA	Phosphoenolpyruvate carboxykinase (ATP) OS=Klebsiella pneumoniae subsp. pneumoniae GN=pckA PE=4 SV=1	41.5584	17	88	2	539	59.653	5.54	95.3	101	97.9	110.6	97.8	97.4
A0A2D2PKE0	CR231_05920	Glutathione ABC transporter substrate-binding protein GsiB OS=Klebsiella pneumoniae GN=CR231_05920 PE=4 SV=1	61.9883	25	86	1	513	56.456	8.76	74.9	78	82	122.5	115.9	126.7
A0A1W1KMH2	rnr	Ribonuclease R OS=Klebsiella pneumoniae GN=rnr PE=3 SV=1	54.4335	36	94	2	812	91.744	8.27	102.1	108.1	106	94	93.8	96
A0A2D2EVE8	CTI52_08220	Ecotin OS=Klebsiella pneumoniae GN=CTI52_08220 PE=4 SV=1	71.7791	14	100	3	163	17.968	7.84	108.4	110.1	109.2	92.6	87.9	91.7
A0A0E1CJP1	fumC	Fumarate hydratase class II OS=Klebsiella pneumoniae 30660/NJST258_1 GN=fumC PE=3 SV=1	65.4886	25	90	2	481	51.526	6.61	80.1	83	86.8	117.7	114.8	117.6
W8VF62	pepB	Peptidase B OS=Klebsiella pneumoniae 30684/NJST258_2 GN=pepB PE=3 SV=1	71.6895	29	94	3	438	47.444	6.32	100.2	105.9	106	99.5	90.4	97.9
A0A060VFE8	ybgI	YbgI protein OS=Klebsiella pneumoniae GN=ybgI PE=4 SV=1	64.257	11	51	1	249	27.199	5.55	103.4	103	103.6	97	98.2	94.8
W1E3T4		Ribose ABC transport system, periplasmic ribose-binding protein RbsB (TC 3.A.1.2.1) OS=Klebsiella pneumoniae IS46 PE=4 SV=1	68.4564	17	78	17	298	31.254	8.85	97.8	98.2	97.4	102.8	101	102.8
R4YCK4	KPR_3664	Uncharacterized protein OS=Klebsiella pneumoniae subsp. rhinoscleromatis SB3432 GN=KPR_3664 PE=3 SV=1	55.2356	35	85	35	764	84.663	6.27	93	93.2	94.1	107.9	105.7	106.1
A0A2G4YCM8	CQB04_21155	Metal ABC transporter substrate-binding protein OS=Klebsiella pneumoniae GN=CQB04_21155 PE=4 SV=1	51.8033	16	100	3	305	33.542	8.25	120	121.8	118.3	74.7	90.5	74.7
A0A0E1CM74	KPNJ1_03862	NIF3-related protein OS=Klebsiella pneumoniae 30660/NJST258_1 GN=KPNJ1_03862 PE=4 SV=1	64.257	11	50	1	249	27.225	5.55	141.2	135	135.3	54	68.6	65.9
A6TBX0	nuoF	NADH-quinone oxidoreductase subunit F OS=Klebsiella pneumoniae subsp. pneumoniae (strain ATCC 700721 / MGH 78578) GN=nuoF PE=3 SV=1	65.1685	27	94	27	445	49.124	6.93	95.9	95.4	94.7	105.1	105.3	103.7
V0AV71	gyrA	DNA gyrase subunit A OS=Klebsiella pneumoniae 909957 GN=gyrA PE=3 SV=1	52.8474	40	106	1	878	96.925	5.1	107	109.1	105.5	86.6	100.4	91.5
A0A2A2SXU3	BVX91_06935	AsmA family protein OS=Klebsiella pneumoniae GN=BVX91_06935 PE=4 SV=1	56.369	30	81	1	683	74.301	9.48	69.1	71.6	72.1	123.6	136.7	127
A0A2G4YKR1	CQB04_00155	Phosphoribosylformylglycinamidine synthase OS=Klebsiella pneumoniae GN=CQB04_00155 PE=4 SV=1	54.8263	49	80	2	1295	140.785	5.41	119.3	123.5	123.8	74.9	78.7	79.8
J2DML7	nadE	NH(3)-dependent NAD(+) synthetase OS=Klebsiella pneumoniae subsp. pneumoniae DSM 30104 GN=nadE PE=3 SV=1	68.2099	16	79	1	324	35.947	6.92	108.5	121	122	89.1	80.2	79.2
A0A1Y0PRK2	B5K12_16660	Uncharacterized protein OS=Klebsiella pneumoniae subsp. pneumoniae GN=B5K12_16660 PE=4 SV=1	56.369	30	81	1	683	74.261	9.48	131.3	139.3	151	56.6	64.3	57.5
A0A0S3FK96	paaN	Bifunctional aldehyde dehydrogenase/enoyl-CoA hydratase OS=Klebsiella pneumoniae GN=paaN PE=4 SV=1	47.8708	25	80	1	681	72.858	6.58	89.3	75	88.9	118.8	118.9	109.1
A0A2G3RR84	CS332_20210	Ferritin-like domain-containing protein OS=Klebsiella pneumoniae subsp. pneumoniae GN=CS332_20210 PE=4 SV=1	48.2143	7	97	2	168	18.896	5.14	124.1	128.3	134.9	79.9	66	66.7
A0A2G8AHE5	C630_15485	Signal recognition particle protein OS=Klebsiella pneumoniae subsp. pneumoniae KpO3210 GN=C630_15485 PE=4 SV=1	75.1101	28	85	28	454	49.737	9.42	99.9	98.7	97.6	101.6	102.5	99.8
W8UN18	dapD	2,3,4,5-tetrahydropyridine-2,6-dicarboxylate N-succinyltransferase OS=Klebsiella pneumoniae 30684/NJST258_2 GN=dapD PE=3 SV=1	75.9124	19	81	19	274	29.813	5.54	103.5	102.4	101.5	96.6	98.8	97.1
A0A193SGS2	galF	UDP-glucose pyrophosphorylase OS=Klebsiella pneumoniae GN=galF PE=4 SV=1	63.7584	14	93	1	298	32.735	5.74	92.6	102.4	108.5	98	99.2	99.2
W1HQF7		Leucyl-tRNA synthetase OS=Klebsiella pneumoniae IS39 PE=4 SV=1	61.3433	33	89	3	670	74.581	5.12	94.1	95.7	102.2	100.2	111.6	96.2
A0A2D2PM15	CR231_08995	Phenylacetate-CoA oxygenase/reductase subunit PaaK OS=Klebsiella pneumoniae GN=CR231_08995 PE=4 SV=1	61.7978	19	81	1	356	38.936	5.86	69.6	76.9	86.3	109.1	129.8	128.3
A0A2G4PZY2	CS372_12020	Aminopeptidase PepB OS=Klebsiella pneumoniae GN=CS372_12020 PE=4 SV=1	72.4299	28	89	2	428	46.164	5.86	77.3	86.2	81.9	117.9	114.7	122
A0A2G4Q1K8	CS372_02175	Phosphoenolpyruvate carboxylase OS=Klebsiella pneumoniae GN=CS372_02175 PE=4 SV=1	67.4972	51	93	51	883	98.785	6.04	102.4	100.5	100.4	95.3	104.1	97.2
A0A2D2J1N3	CTI63_23970	Translocation/assembly module TamB OS=Klebsiella pneumoniae GN=CTI63_23970 PE=4 SV=1	47.4563	40	70	5	1258	135.579	6.14	102	100.4	99.6	102.5	97.9	97.7
A0A1Y0PUA1	B5K12_11525	Aldehyde dehydrogenase OS=Klebsiella pneumoniae subsp. pneumoniae GN=B5K12_11525 PE=3 SV=1	58.498	20	66	20	506	55.159	5.72	112.2	113.1	114	84.6	92.1	84
A0A1B2ZFA8	BCB67_21655	Heat-shock protein OS=Klebsiella pneumoniae GN=BCB67_21655 PE=3 SV=1	87.1795	10	80	10	156	17.734	5.39	132	134.3	132.3	65.8	70.1	65.4
A0A2D3CPB2	KPH11_00530	DNA gyrase subunit A OS=Klebsiella pneumoniae subsp. pneumoniae GN=KPH11_00530 PE=4 SV=1	52.9076	40	104	1	877	96.922	5.1	110.3	90.3	92.9	99.3	100.7	106.6
B5Y276	deoA	Thymidine phosphorylase OS=Klebsiella pneumoniae (strain 342) GN=deoA PE=3 SV=1	63.8636	22	62	2	440	47.071	5.36	93.7	101.3	93.7	76.9	151	83.3
W1H1A0		Dipeptide-binding ABC transporter, periplasmic substrate-binding component (TC 3.A.1.5.2) Putative hemin-binding lipoprotein OS=Klebsiella pneumoniae ISC21 PE=4 SV=1	61.9883	26	86	2	513	56.525	8.88	162.8	149.9	148.5	43.1	49.8	46
A0A2G9LF99	CKQ90_15050	Superoxide dismutase [Fe] (Fragment) OS=Klebsiella pneumoniae GN=CKQ90_15050 PE=4 SV=1	90.4762	5	109	1	84	9.503	6.34	71.7	82.3	85.1	118.9	108.9	133.2
G4WHZ0	groEL	60 kDa chaperonin OS=Klebsiella pneumoniae GN=groEL PE=3 SV=1	17.2161	10	91	2	546	57.027	5.17	105.5	110.5	84.3	106.8	99.4	93.3
A0A2G4Y7F6	CQB04_23505	Betaine-aldehyde dehydrogenase OS=Klebsiella pneumoniae GN=CQB04_23505 PE=4 SV=1	55.5102	21	68	2	490	52.91	5.26	122.2	123.9	125.4	72.6	83.3	72.6
A0A0G3EZU1	galF	GalF UTP-glucose-1-phosphate uridylyltransferase OS=Klebsiella pneumoniae GN=galF PE=4 SV=1	48.9865	10	90	1	296	32.568	5.54	101.7	101.9	102.5	101.2	90.2	102.5
A0A0H3GWP1	KPHS_39230	Sulfurtransferase OS=Klebsiella pneumoniae subsp. pneumoniae (strain HS11286) GN=KPHS_39230 PE=4 SV=1	78.5965	17	76	17	285	31.158	4.75	102.9	99.8	99.8	97.4	101.9	98.3
W1HS20		Site-determining protein OS=Klebsiella pneumoniae IS39 PE=3 SV=1	64.4599	20	82	5	287	31.682	5.88	99.2	102.8	103.3	99.8	96	98.9
A0A2D1HE57	AN663_04105	1,4-alpha-glucan-branching protein OS=Klebsiella pneumoniae subsp. pneumoniae GN=AN663_04105 PE=4 SV=1	69.7802	40	110	25	728	83.742	6.64	103.1	99.7	98.3	98.6	103.6	96.7
A0A2A5ILP3	fusA	Elongation factor G OS=Klebsiella pneumoniae subsp. pneumoniae GN=fusA PE=3 SV=1	64.8571	29	71	2	700	77.311	5.33	100.4	96.2	95.7	101.7	105.5	100.5
B0F9V2	groEL	60 kDa chaperonin OS=Klebsiella pneumoniae GN=groEL PE=3 SV=1	17.1548	9	88	2	478	49.979	5.07	108.4	105.5	109.1	90.2	92.5	94.4
C8TC94	fkpA	Peptidyl-prolyl cis-trans isomerase OS=Klebsiella pneumoniae subsp. rhinoscleromatis ATCC 13884 GN=fkpA PE=3 SV=1	63.8225	20	89	2	293	31.4	8.7	82.2	80.2	78.6	122.1	111.6	125.3
A0A060VGU6	purB	Adenylosuccinate lyase OS=Klebsiella pneumoniae GN=purB PE=3 SV=1	64.693	27	89	13	456	51.638	5.96	92.8	93.6	94.9	107.3	106.3	105.1
V0ANQ4	HMPREF1619_04476	Stringent starvation protein A OS=Klebsiella pneumoniae 909957 GN=HMPREF1619_04476 PE=3 SV=1	62.2642	11	79	2	212	24.174	5.33	97.7	96.2	98.2	105.1	99.4	103.3
A0A2G4RSB6	CK204_15695	Histidine--tRNA ligase OS=Klebsiella pneumoniae GN=CK204_15695 PE=4 SV=1	80.8962	25	65	1	424	47.041	5.55	124.3	132.4	145.5	59.6	78.2	60
A0A0E1CIG5	clpX	ATP-dependent Clp protease ATP-binding subunit ClpX OS=Klebsiella pneumoniae 30660/NJST258_1 GN=clpX PE=3 SV=1	73.4091	25	77	23	440	48.356	6.48	90.4	91	90.8	110.5	109.2	108.1
A0A060VKW5	dadA	D-amino acid dehydrogenase OS=Klebsiella pneumoniae GN=dadA PE=3 SV=1	61.9048	19	68	19	441	48.203	7.52	99.9	100.7	100.9	99.2	102.4	96.9
A0A2D2ENN4	CTI52_24965	Quinone oxidoreductase OS=Klebsiella pneumoniae GN=CTI52_24965 PE=4 SV=1	76.7584	23	77	2	327	35.167	6.89	94.9	97.5	98.5	106.7	99.9	102.5
B5XQD1	pheT	Phenylalanine--tRNA ligase beta subunit OS=Klebsiella pneumoniae (strain 342) GN=pheT PE=3 SV=1	56.7296	36	82	2	795	86.904	5.21	86.1	89.3	88.3	110.2	110.3	115.8
A0A0J4QZP9	rplB	50S ribosomal protein L2 OS=Klebsiella pneumoniae GN=rplB PE=3 SV=1	67.033	20	123	20	273	29.816	10.93	100.3	99.5	98.9	100.7	99.1	101.4
A0A1B3A3Q1	bamC	Outer membrane protein assembly factor BamC OS=Klebsiella pneumoniae GN=bamC PE=3 SV=1	67.7326	19	64	1	344	37.126	7.33	151.8	149.1	136	58.9	54.9	49.3
A0A1B3A2G3	fusA	Elongation factor G OS=Klebsiella pneumoniae GN=fusA PE=3 SV=1	64.8571	29	70	1	700	77.321	5.29	120.4	118.8	124.9	72.2	82.3	81.5
A0A0E1CKI8	KPNJ1_04995	Microcin-processing peptidase 1 (PmbA) OS=Klebsiella pneumoniae 30660/NJST258_1 GN=KPNJ1_04995 PE=4 SV=1	68.7104	24	66	24	473	51.17	6.14	103.6	101.3	99.1	97.4	100.1	98.4
A0A060VN82	mdoG	Glucans biosynthesis protein G OS=Klebsiella pneumoniae GN=mdoG PE=3 SV=1	58.1574	29	80	29	521	59.027	8.66	99	101	101.2	100.1	98.4	100.3
A0A0G3RLT9	yjbJ	Putative stress-response protein OS=Klebsiella pneumoniae GN=yjbJ PE=3 SV=1	86.9565	14	162	14	69	8.269	5.54	111.4	114.3	116.3	87.2	77.4	93.4
A0A2G8ASJ8	C630_04050	Serine--tRNA ligase OS=Klebsiella pneumoniae subsp. pneumoniae KpO3210 GN=C630_04050 PE=4 SV=1	78.3721	27	105	15	430	48.573	5.77	98.1	98.3	99.9	101.9	102.1	99.7
A0A170CUR2	paaC	Phenylacetate-CoA oxygenase subunit PaaI OS=Klebsiella pneumoniae GN=paaC PE=4 SV=1	69.3227	13	68	2	251	27.926	5.31	82.4	71.5	73.3	121.1	128.1	123.6
A0A2G3RZP7	CS332_06785	Serine hydroxymethyltransferase OS=Klebsiella pneumoniae subsp. pneumoniae GN=CS332_06785 PE=4 SV=1	43.1655	20	99	1	417	45.41	6.34	80.3	71.7	66.7	133.2	125.4	122.6
A0A099PNQ0	infC	Translation initiation factor IF-3 OS=Klebsiella pneumoniae GN=infC PE=3 SV=1	60.5556	11	65	11	180	20.508	9.52	98.9	97.3	96.1	104.3	102.6	100.8
A0A0J4Y161	hutU	Urocanate hydratase OS=Klebsiella pneumoniae GN=hutU PE=3 SV=1	53.2028	21	89	2	562	61.513	6.49	96.7	98.4	99.6	95.3	106.8	103
W1E2T6		Phenylacetate-CoA oxygenase, PaaI subunit OS=Klebsiella pneumoniae IS46 PE=4 SV=1	69.3227	14	67	3	251	27.968	5.44	122.5	121.8	120.4	76.9	82.4	75.9
W1GJJ7	pepQ	Xaa-Pro dipeptidase OS=Klebsiella pneumoniae ISC21 GN=pepQ PE=3 SV=1	60.9481	19	75	2	443	50.099	6.19	93.5	77.7	79	115.8	119.2	114.7
A0A231WHB4	hemL	Glutamate-1-semialdehyde 2,1-aminomutase OS=Klebsiella pneumoniae GN=hemL PE=3 SV=1	57.0423	16	59	2	426	45.269	5.02	112.1	103.7	98.2	87.7	108.7	89.6
A0A1Y0Q498	B5K12_06510	Uncharacterized protein OS=Klebsiella pneumoniae subsp. pneumoniae GN=B5K12_06510 PE=4 SV=1	47.1074	5	195	1	121	12.228	5.1	124.8	134.6	135.8	66.7	71	67.2
A0A2G3S0Y0	CS332_04135	Molecular chaperone HtpG OS=Klebsiella pneumoniae subsp. pneumoniae GN=CS332_04135 PE=4 SV=1	32.0513	18	77	0	624	71.471	5.21
J2LSY6	fumC	Fumarate hydratase class II OS=Klebsiella pneumoniae subsp. pneumoniae DSM 30104 GN=fumC PE=3 SV=1	66.1765	25	82	2	476	50.995	6.61	111	106	103.9	91	97	91.1
W1B088		Attachment invasion locus protein OS=Klebsiella pneumoniae IS22 PE=4 SV=1	17.5439	2	51	1	171	18.591	7.17	97.1	97.2	92.7	96.7	111.2	105.1
W1HQX7		Thiol:disulfide interchange protein OS=Klebsiella pneumoniae IS39 PE=3 SV=1	66.8182	14	76	2	220	24.443	5.95	86.6	88	89.9	114.9	109.2	111.3
A0A0J4Y3Y4	SM87_00277	Translocation and assembly module TamB OS=Klebsiella pneumoniae GN=SM87_00277 PE=4 SV=1	42.1304	37	65	2	1258	135.684	6.11	109.6	119.4	101.8	93.2	97.4	78.6
A6TGR7	aceA	Isocitrate lyase OS=Klebsiella pneumoniae subsp. pneumoniae (strain ATCC 700721 / MGH 78578) GN=aceA PE=4 SV=1	74.7153	24	76	2	439	48.352	5.58	115.1	121.2	114	86.5	80.3	82.9
A0A2D2PUD6	CR231_22715	NAD(P)-dependent alcohol dehydrogenase OS=Klebsiella pneumoniae GN=CR231_22715 PE=4 SV=1	69.0544	19	59	1	349	37.376	6.25	83.3	74.5	75.4	126	122.5	118.3
A0A0E1CDD9	KPNJ1_02496	Glutathione S-transferase OS=Klebsiella pneumoniae 30660/NJST258_1 GN=KPNJ1_02496 PE=3 SV=1	77.6119	14	83	1	201	22.361	6.39	113.6	116.2	120.2	83.4	77.7	88.8
A0A0E1CHW1	KPNJ1_02322	SufD protein OS=Klebsiella pneumoniae 30660/NJST258_1 GN=KPNJ1_02322 PE=4 SV=1	75.7075	21	79	2	424	47.064	6.9	84.3	84.2	85.4	121	113.7	111.4
A0A170IEK6	gst	Glutathione S-transferase OS=Klebsiella pneumoniae GN=gst PE=3 SV=1	77.6119	14	77	1	201	22.391	6.39	23.5	19.6	21.1	186.2	170.5	179
A0A168WT22	BU230_40380	DUF1471 domain-containing protein OS=Klebsiella pneumoniae GN=BU230_40380 PE=4 SV=1	61.1111	4	93	1	90	9.498	8.97	85.6	88.9	90.8	112.9	102.7	119
A0A0C7KGN8	fabD_1	Malonyl CoA-acyl carrier protein transacylase OS=Klebsiella pneumoniae GN=fabD_1 PE=3 SV=1	68.932	13	79	1	309	32.319	5.1	101.7	96.9	95	109.8	100.7	95.9
A0A237T2A9	CI704_10700	NAD(P)-dependent alcohol dehydrogenase OS=Klebsiella pneumoniae subsp. pneumoniae GN=CI704_10700 PE=3 SV=1	64.7564	18	57	1	349	37.363	6.04	109.9	99.9	104.4	100.1	99.2	86.4
A0A0C7KHW8	uvrA	UvrABC system protein A OS=Klebsiella pneumoniae GN=uvrA PE=3 SV=1	62.9118	39	73	2	941	103.908	6.67	102	104	105.5	97.2	96.3	94.9
W1AQY3		Oligopeptide ABC transporter, periplasmic oligopeptide-binding protein OppA (TC 3.A.1.5.1) OS=Klebsiella pneumoniae IS22 PE=4 SV=1	29.4118	10	93	2	442	50.335	6.96	135.5	115.3	113.2	87.2	88.1	60.7
W1B0C9		Fumarate reductase flavoprotein subunit OS=Klebsiella pneumoniae IS22 PE=3 SV=1	46.6777	24	91	3	602	65.93	6.28	107.3	102	97.7	100.1	100.9	92.2
W8V177	KPNJ2_04881	Uncharacterized protein OS=Klebsiella pneumoniae 30684/NJST258_2 GN=KPNJ2_04881 PE=3 SV=1	71.3405	29	66	29	649	71.059	6.37	98.9	99.8	98.4	100.9	101.1	100.9
B5XNT0	hisJ	Histidine ABC transporter, periplasmic histidine-binding protein OS=Klebsiella pneumoniae (strain 342) GN=hisJ PE=3 SV=1	78.8462	23	71	21	260	28.547	7.14	104.5	109.5	108.4	95	90.3	92.2
A0A1J7DGE9	B4U22_07215	Formate C-acetyltransferase/glycerol dehydratase family glycyl radical enzyme OS=Klebsiella pneumoniae GN=B4U22_07215 PE=4 SV=1	68.1481	37	91	37	810	90.267	6.46	141.4	147.4	146.5	52	59.6	53.1
A0A2A2NQ77	CKJ89_04285	Uncharacterized protein OS=Klebsiella pneumoniae GN=CKJ89_04285 PE=4 SV=1	71.3483	12	105	1	178	19.798	6.2	148.2	151.3	147.8	49.8	58.7	44.2
W8UN13	pyrH	Uridylate kinase OS=Klebsiella pneumoniae 30684/NJST258_2 GN=pyrH PE=3 SV=1	61.4108	9	53	2	241	25.939	7.39	103.4	100.3	102	99.2	104.5	90.5
A0A2G4Y6V9	CQB04_27695	Signal peptide peptidase SppA OS=Klebsiella pneumoniae GN=CQB04_27695 PE=4 SV=1	75.7075	21	81	2	424	47.047	6.99	98.9	102.1	107.7	98.2	95.9	97.3
A0A0S3FGZ0	ugd	UDP-glucose 6-dehydrogenase OS=Klebsiella pneumoniae GN=ugd PE=3 SV=1	74.4845	25	112	2	388	43.494	5.57	98.3	104.4	104.5	95.6	103.3	94
A0A2D3CK00	BMF28_24200	Transcription-repair coupling factor OS=Klebsiella pneumoniae GN=BMF28_24200 PE=4 SV=1	49.3031	47	77	3	1148	129.874	6.24	107.4	83.1	90.9	99.8	114.4	104.5
R4Y445	rhlB	ATP-dependent RNA helicase RhlB OS=Klebsiella pneumoniae subsp. rhinoscleromatis SB3432 GN=rhlB PE=3 SV=1	71.4286	20	84	1	427	47.871	7.28	92.1	90.9	90.2	108.7	114	104.1
A0A2D2FFH2	CR231_06320	3-phosphoserine/phosphohydroxythreonine aminotransferase OS=Klebsiella pneumoniae GN=CR231_06320 PE=4 SV=1	57.7348	19	75	1	362	39.646	5.71	35.1	35.3	36.5	164.6	162.2	166.2
A0A060VEX9	aceA	AceA protein OS=Klebsiella pneumoniae GN=aceA PE=4 SV=1	75.8542	25	81	1	439	48.368	5.49	100.3	103.4	104.4	96.9	105.1	89.8
B5XRJ3	paaJ	Beta-ketoadipyl CoA thiolase PaaJ OS=Klebsiella pneumoniae (strain 342) GN=paaJ PE=3 SV=1	58.6035	13	41	1	401	42.042	6.33	154	162.3	145.5	37.1	66.8	34.4
W1DFB0		Manganese superoxide dismutase OS=Klebsiella pneumoniae IS43 PE=4 SV=1	46.3014	14	158	5	365	40.891	7.03	114.1	111.9	109.3	91.2	86.4	87.2
A0A164BZB7	hmp_1	Phenylacetate-CoA oxygenase/reductase subunit PaaK OS=Klebsiella pneumoniae GN=hmp_1 PE=4 SV=1	63.764	20	70	1	356	38.966	5.86	85.7	82.2	83.4	117	117.6	114
A0A0W0GSA4	yneA	Putative LacI-type transcriptional regulator OS=Klebsiella pneumoniae GN=yneA PE=4 SV=1	60.8309	16	84	1	337	36.25	8.53	153.5	152.7	154.6	47.8	46	45.5
V0AKN6	rraA	Regulator of ribonuclease activity A OS=Klebsiella pneumoniae 909957 GN=rraA PE=3 SV=1	100	10	45	10	161	17.375	4.2	100.4	101	102.5	98.6	98.5	98.9
A0A1V0C9K8	AM447_18045	Uncharacterized protein OS=Klebsiella pneumoniae GN=AM447_18045 PE=4 SV=1	67.8261	7	97	7	115	12.556	6.16	105.4	105.5	106.6	95.6	88	98.8
A0A1W1J683	argS	Arginine--tRNA ligase OS=Klebsiella pneumoniae GN=argS PE=3 SV=1	69.6707	33	65	3	577	64.26	5.55	98.3	100	97.8	101.7	102.1	100.1
V0AQ19	HMPREF1619_03994	Gamma-glutamyltransferase OS=Klebsiella pneumoniae 909957 GN=HMPREF1619_03994 PE=4 SV=1	50	27	76	2	580	61.871	6.24	37.9	34.1	38.3	147.2	205.8	136.7
A0A1B3A0S4	BCB67_04320	Spermidine/putrescine ABC transporter substrate-binding protein OS=Klebsiella pneumoniae GN=BCB67_04320 PE=4 SV=1	80.315	26	78	2	381	42.223	7.68	114.5	121.8	119.2	88.4	79.9	76.3
A0A0J4N166	tdh	L-threonine 3-dehydrogenase OS=Klebsiella pneumoniae GN=tdh PE=3 SV=1	54.5455	14	88	14	341	37.217	6.24	100.8	101.2	100.9	99.9	99.5	97.8
A0A2D1HM79	AN663_19670	Transcription-repair coupling factor OS=Klebsiella pneumoniae subsp. pneumoniae GN=AN663_19670 PE=4 SV=1	46.6028	46	75	2	1148	129.845	6.28	129.6	111.1	110.5	81.7	87.4	79.7
B5XXX4	uvrA	UvrABC system protein A OS=Klebsiella pneumoniae (strain 342) GN=uvrA PE=3 SV=1	61.2115	38	70	1	941	103.895	6.55	107.1	109.1	95.2	97.6	102.5	88.4
A0A231WHI7	B1727_29490	DNA-binding transcriptional regulator FruR OS=Klebsiella pneumoniae GN=B1727_29490 PE=4 SV=1	61.6766	15	68	15	334	38.056	7.23	100.8	95.2	95.7	100.1	106.1	102
A0A2D2PLI8	CR231_07995	Arginine N-succinyltransferase OS=Klebsiella pneumoniae GN=CR231_07995 PE=4 SV=1	66.8605	16	56	1	344	38.353	5.48	50.9	43.4	46.6	155.1	150.9	153.1
W8UWG7	topA	DNA topoisomerase 1 OS=Klebsiella pneumoniae 30684/NJST258_2 GN=topA PE=3 SV=1	62.1684	43	77	43	867	97.48	8.31	98.2	99.9	100.6	100.2	101.4	99.5
A0A1V7HLU6	B8011_26240	Cystine ABC transporter substrate-binding protein OS=Klebsiella pneumoniae GN=B8011_26240 PE=3 SV=1	75.188	25	104	2	266	28.951	8.84	95.4	98.2	99.3	103	99.4	104.6
W1B5T3		Fructose-bisphosphate aldolase class II OS=Klebsiella pneumoniae IS22 PE=3 SV=1	38.4401	12	95	1	359	39.123	5.86	124.6	100.9	118.5	103.1	85.1	67.9
A0A2G4YG11	paaF	Phenylacetate--CoA ligase OS=Klebsiella pneumoniae GN=paaF PE=4 SV=1	56.1644	24	92	24	438	48.993	6.6	114.1	110.3	109.2	86.2	90.6	89.6
A0A2G4Y9A0	speB	Agmatinase OS=Klebsiella pneumoniae GN=speB PE=4 SV=1	57.1895	10	72	10	306	33.509	5.29	103.7	101.3	101.8	98.1	99.7	95.4
A0A1B2ZTL4	rhlB	ATP-dependent RNA helicase RhlB OS=Klebsiella pneumoniae GN=rhlB PE=3 SV=1	72.4466	20	79	1	421	47.063	7.27	131.7	139.5	135.4	69	68.2	56.2
A0A0E1CB53	KPNJ1_00243	Cellulose synthase regulatory subunit OS=Klebsiella pneumoniae 30660/NJST258_1 GN=KPNJ1_00243 PE=4 SV=1	48.0793	31	75	31	807	89.101	6.28	94.9	95.4	94.6	103.7	107.3	104.1
A0A2G4PVK9	CS372_17720	DUF1479 domain-containing protein OS=Klebsiella pneumoniae GN=CS372_17720 PE=4 SV=1	44.4181	18	100	2	421	47.316	5.96	154.8	137	134	57.4	60.2	56.5
W9B2T6	BCB67_18050	Peptidyl-prolyl cis-trans isomerase OS=Klebsiella pneumoniae GN=BCB67_18050 PE=3 SV=1	66.6667	19	85	1	276	29.458	8.72	114.5	116.2	118.5	85.1	82.9	82.8
A0A0C7KB50	ggt	Gamma-glutamyltransferase OS=Klebsiella pneumoniae GN=ggt PE=4 SV=1	49.9139	27	74	2	581	62.015	6.24	110.8	114.3	116.7	86.3	89.4	82.5
A0A0W8AK57	gcvT	Aminomethyltransferase OS=Klebsiella pneumoniae GN=gcvT PE=3 SV=1	56.044	15	66	15	364	39.762	5.36	94.7	94.3	93.6	106.6	106.1	104.7
A0A2D1J491	CR230_18410	Penicillin-binding protein activator LpoB OS=Klebsiella pneumoniae GN=CR230_18410 PE=4 SV=1	57.2093	7	62	7	215	22.554	9.17	99.8	99.5	100.9	101.7	100.2	97.9
R4Y5V3	csrA	Translational regulator CsrA OS=Klebsiella pneumoniae subsp. rhinoscleromatis SB3432 GN=csrA PE=3 SV=1	63.9344	4	91	4	61	6.852	8.62	111	111.5	112	88.8	86	90.6
A6TCW1	recA	Protein RecA OS=Klebsiella pneumoniae subsp. pneumoniae (strain ATCC 700721 / MGH 78578) GN=recA PE=3 SV=1	63.9205	15	66	15	352	37.9	5.19	93.1	93.8	94.6	106	107.4	105.1
W1B5F3	lysS	Lysine--tRNA ligase OS=Klebsiella pneumoniae IS22 GN=lysS PE=3 SV=1	44.5545	22	80	1	505	57.567	5.24	101.8	95.9	98.4	98.3	119.2	86.4
A0A0J4Y1K6	SM87_01621	Thioredoxin reductase OS=Klebsiella pneumoniae GN=SM87_01621 PE=3 SV=1	75.2266	15	61	1	331	35.612	5.52	103.2	97.6	96.9	106.9	95.8	99.7
A0A231WKF4	B1727_25530	Thioredoxin reductase OS=Klebsiella pneumoniae GN=B1727_25530 PE=3 SV=1	77.3292	15	58	1	322	34.551	5.63	90.2	77.4	88.2	112.9	125.2	106.1
W1EGJ6		UPF0234 protein OS=Klebsiella pneumoniae IS53 PE=3 SV=1	62.5	14	64	14	192	21.823	9.63	100.3	100.5	101.1	100	98.6	99.5
A0A170DM99	gshB	Glutathione synthetase OS=Klebsiella pneumoniae GN=gshB PE=3 SV=1	82.5949	19	63	2	316	35.428	5.31	97.3	100.3	100.1	100.2	102.1	100
A0A237LZU1	hutI	Imidazolonepropionase OS=Klebsiella pneumoniae subsp. pneumoniae GN=hutI PE=3 SV=1	62.963	17	50	2	405	44.128	5.63	79.6	80	81.3	112.8	126.5	119.8
R4Y6J3	fusA1	Elongation factor G OS=Klebsiella pneumoniae subsp. rhinoscleromatis SB3432 GN=fusA1 PE=3 SV=1	56	25	63	1	700	77.224	5.36	119	122.5	113.7	75.4	96	73.4
A0A1Y0Q3V6	B5K12_05640	2',3'-cyclic-nucleotide 2'-phosphodiesterase OS=Klebsiella pneumoniae subsp. pneumoniae GN=B5K12_05640 PE=3 SV=1	69.3972	28	70	2	647	70.594	6.27	110	104.7	106.3	91.9	91.7	95.4
A0A237M782	ilvC	Ketol-acid reductoisomerase (NADP(+)) OS=Klebsiella pneumoniae subsp. pneumoniae GN=ilvC PE=3 SV=1	66.8024	30	76	30	491	53.917	5.36	94	93.8	96.2	103.4	106.1	106.4
W1GNA0		UDP-glucose dehydrogenase OS=Klebsiella pneumoniae ISC21 PE=3 SV=1	74.4845	25	106	1	388	43.524	5.57	105.8	110.7	111.6	92.2	93.7	86
J2X2X0	fadB	Fatty acid oxidation complex subunit alpha OS=Klebsiella pneumoniae subsp. pneumoniae DSM 30104 GN=fadB PE=3 SV=1	51.6869	34	86	2	741	80.754	6.46	140	143.2	139.1	60.2	66.1	51.4
A0A0J4Y2Y7	pyrH	Uridylate kinase OS=Klebsiella pneumoniae GN=pyrH PE=3 SV=1	61.4108	8	47	1	241	25.924	7.39	104.8	118.1	112.3	100.4	82.1	82.3
A0A1S8YC50	menB	1,4-dihydroxy-2-naphthoyl-CoA synthase OS=Klebsiella pneumoniae GN=menB PE=3 SV=1	69.4737	14	44	2	285	31.594	6.4	103.7	104.8	100.7	98.2	102.1	90.5
V0APC2	fadB	Fatty acid oxidation complex subunit alpha OS=Klebsiella pneumoniae 909957 GN=fadB PE=3 SV=1	51.552	33	85	1	741	80.724	6.46	108.5	115.6	113.2	78	104.9	79.8
A0A2D2PQK6	CR231_15640	1,4-dihydroxy-2-naphthoyl-CoA synthase OS=Klebsiella pneumoniae GN=CR231_15640 PE=4 SV=1	71.9298	15	47	2	285	31.604	6.54	111.3	100.6	105.3	93.7	102.2	86.9
A0A2G4YG91	paaC	3-hydroxyacyl-CoA dehydrogenase PaaC OS=Klebsiella pneumoniae GN=paaC PE=4 SV=1	69.556	22	61	1	473	50.746	6.48	133.3	147.7	136.3	56.1	59.6	67.1
A0A2A5ID81	fadB	Fatty acid oxidation complex subunit alpha OS=Klebsiella pneumoniae subsp. pneumoniae GN=fadB PE=3 SV=1	52.4005	33	85	1	729	79.226	6.57	114	112.5	116.8	85.7	82.3	88.6
A0A169GX73	dmsA_3	Anaerobic dimethyl sulfoxide reductase subunit A OS=Klebsiella pneumoniae GN=dmsA_3 PE=3 SV=1	48.8916	30	67	1	812	89.888	6.92	79	85.2	84.5	119.8	115	116.6
W8UNJ9	rpsG	30S ribosomal protein S7 OS=Klebsiella pneumoniae 30684/NJST258_2 GN=rpsG PE=3 SV=1	73.0769	15	109	15	156	17.607	10.3	95.3	95.8	97	107.7	98.5	105.7
J2LUI2	selD	Selenide, water dikinase OS=Klebsiella pneumoniae subsp. pneumoniae DSM 30104 GN=selD PE=3 SV=1	65.043	12	52	1	349	36.405	5.19	134.3	141.3	136.6	61.6	64.9	61.3
A0A098CEP3	AGG09_26195	Spermidine/putrescine ABC transporter substrate-binding protein OS=Klebsiella pneumoniae GN=AGG09_26195 PE=4 SV=1	80.315	26	73	2	381	42.194	7.34	106.1	110.8	107.2	93	91.2	91.8
A0A0H3GWT3	KPHS_41790	Lipoprotein NlpD OS=Klebsiella pneumoniae subsp. pneumoniae (strain HS11286) GN=KPHS_41790 PE=4 SV=1	56.3492	13	84	13	378	39.335	9.66	98.9	97.8	97.3	99.7	105.9	100.5
W1DUE2		Aldose 1-epimerase family protein YeaD OS=Klebsiella pneumoniae IS43 PE=4 SV=1	59.194	14	70	14	397	44.436	6.57	94.3	96.9	96.9	104.1	105.2	102.5
A0A1V0C1R5	serC	Phosphoserine aminotransferase OS=Klebsiella pneumoniae GN=serC PE=3 SV=1	57.7348	18	71	1	362	39.618	5.71	148.9	153.2	160.1	45.4	51.3	41
A0A094Z802	nifJ	Pyruvate-flavodoxin oxidoreductase OS=Klebsiella pneumoniae GN=nifJ PE=3 SV=1	53.617	43	76	43	1175	128.239	5.85	102.8	102	103.3	95.1	95.8	101
A0A2G3S2V0	CS332_00140	30S ribosomal protein S8 OS=Klebsiella pneumoniae subsp. pneumoniae GN=CS332_00140 PE=4 SV=1	74.6154	13	74	13	130	14.118	9.42	94.7	96.6	97.2	104	102.9	104.7
A0A1B3A5E3	BCB67_16905	Autoinducer 2 ABC transporter substrate-binding protein OS=Klebsiella pneumoniae GN=BCB67_16905 PE=4 SV=1	60.3604	16	78	1	333	35.936	8.53	152	168.3	168.4	39	37.2	35.1
A0A2D2GQF3	CTI55_14035	2-hydroxyacid dehydrogenase OS=Klebsiella pneumoniae GN=CTI55_14035 PE=4 SV=1	55.9271	17	79	1	329	36.339	5.97	104	110.6	110.2	90	95.1	90.1
A0A2G3S2U4	CS332_02785	2,3-diphosphoglycerate-dependent phosphoglycerate mutase OS=Klebsiella pneumoniae subsp. pneumoniae GN=CS332_02785 PE=4 SV=1	48.8	16	107	1	250	28.435	5.94	96.7	103.4	100.4	94	103.9	101.5
A0A0E1CP42	KPNJ1_04556	Penicillin-binding protein 1B OS=Klebsiella pneumoniae 30660/NJST258_1 GN=KPNJ1_04556 PE=3 SV=1	50.8772	30	68	30	855	95.627	9.33	103.1	101.9	101.6	97	98.5	98
W9BB63	crp	Crp protein OS=Klebsiella pneumoniae GN=crp PE=4 SV=1	88.0952	18	102	18	210	23.641	8.25	98.1	100.7	101.2	101.5	98.3	100.3
W9B847	paaC	PaaC protein OS=Klebsiella pneumoniae GN=paaC PE=4 SV=1	69.3227	13	61	1	251	27.91	5.31	130.2	119.7	125.3	70.2	81.6	72.9
A0A1B2ZSA2	BCB67_09245	Zinc-binding dehydrogenase OS=Klebsiella pneumoniae GN=BCB67_09245 PE=3 SV=1	64.4699	17	52	1	349	37.407	6.04	131.6	124.4	134.8	69.6	69.2	70.5
A0A2D1HNU7	betA	Oxygen-dependent choline dehydrogenase OS=Klebsiella pneumoniae subsp. pneumoniae GN=betA PE=4 SV=1	82.13	30	67	30	554	61.511	6.25	98.4	98.3	97.5	100.7	105.2	100
W1AS69	pyrG	CTP synthase OS=Klebsiella pneumoniae IS22 GN=pyrG PE=3 SV=1	46.055	21	70	1	545	60.336	5.94	113.5	117.3	111.2	76.1	93	89
W8VE84	KPNJ2_00911	Zinc metalloprotease OS=Klebsiella pneumoniae 30684/NJST258_2 GN=KPNJ2_00911 PE=3 SV=1	65.7588	14	65	14	257	27.517	7.44	95.4	92.5	94	104.5	108.6	105.1
A0A0E1CLR5	KPNJ1_05422	GTP-binding protein TypA/BipA OS=Klebsiella pneumoniae 30660/NJST258_1 GN=KPNJ1_05422 PE=4 SV=1	60.4613	26	93	9	607	67.217	5.33	98.6	99.7	100.8	100.6	100.3	100
A0A0H3GR70	KPHS_06260	4-hydroxyphenylacetate catabolism OS=Klebsiella pneumoniae subsp. pneumoniae (strain HS11286) GN=KPHS_06260 PE=4 SV=1	68.0769	26	80	26	520	58.818	6.24	93.5	92.9	92.9	107.7	106.6	106.4
A0A2D2PWE7	paaC	3-hydroxyacyl-CoA dehydrogenase PaaC OS=Klebsiella pneumoniae GN=paaC PE=4 SV=1	69.556	22	61	1	473	50.833	6.37	48.7	50.2	41.6	157.4	149.7	152.4
W1DVL7	rcsB	Transcriptional regulatory protein RcsB OS=Klebsiella pneumoniae IS46 GN=rcsB PE=3 SV=1	66.6667	14	71	14	216	23.705	6.81	90.5	93.4	94.3	109.9	103.2	108.6
A0A060VP92	yfgL	Outer membrane protein assembly factor BamB OS=Klebsiella pneumoniae GN=yfgL PE=3 SV=1	67.602	17	89	1	392	42.044	4.96	36.2	34.3	37.6	163.1	160.2	168.5
A0A2A2NI90	CKJ89_25455	Cystine ABC transporter substrate-binding protein OS=Klebsiella pneumoniae GN=CKJ89_25455 PE=3 SV=1	75.188	25	96	2	266	28.805	9.01	122.1	129.1	126.1	70.1	71.5	81
B5XWU5	ydcW	Gamma-aminobutyraldehyde dehydrogenase OS=Klebsiella pneumoniae (strain 342) GN=ydcW PE=3 SV=1	62.9474	18	61	1	475	50.497	6.32	104.5	105.8	96.6	92.7	121.6	78.7
W1H0I3		Thioredoxin OS=Klebsiella pneumoniae ISC21 PE=3 SV=1	74.3119	8	60	3	109	11.843	4.88	92.7	98.5	98.7	107.9	98.1	104.2
A0A2D2EPU4	CTI52_14270	3-hydroxyacyl-CoA dehydrogenase OS=Klebsiella pneumoniae GN=CTI52_14270 PE=4 SV=1	67.8647	22	60	1	473	50.701	6.6	138.4	139.8	127.8	52.8	86.3	55
A0A2D3CKT0	BMF28_22510	Imidazolonepropionase OS=Klebsiella pneumoniae GN=BMF28_22510 PE=4 SV=1	64.9383	18	49	3	405	44.164	5.53	128.9	110.5	108.7	75.8	94.8	81.3
A0A2D2IZ67	CTI63_19960	Uncharacterized protein OS=Klebsiella pneumoniae GN=CTI63_19960 PE=4 SV=1	50.4587	4	84	1	109	11.638	9.28	88.3	92.6	92.6	109.2	108.6	108.7
C8SYS6	bamB	Outer membrane protein assembly factor BamB OS=Klebsiella pneumoniae subsp. rhinoscleromatis ATCC 13884 GN=bamB PE=3 SV=1	67.602	17	93	1	392	42.03	4.96	92.8	105.7	102.6	103.8	95.9	99.2
A0A170K192	yneA	Putative LacI-type transcriptional regulator OS=Klebsiella pneumoniae GN=yneA PE=4 SV=1	61.2613	15	78	1	333	35.934	8.27	45.3	50.3	53.1	154.8	146.3	150.1
A0A0E1CDJ6	KPNJ1_02320	Scaffold protein sufB OS=Klebsiella pneumoniae 30660/NJST258_1 GN=KPNJ1_02320 PE=4 SV=1	57.9568	21	58	21	509	56.483	5.4	105.6	105.9	105.6	93.7	95.7	93.4
A6T7T4	astA	Arginine N-succinyltransferase OS=Klebsiella pneumoniae subsp. pneumoniae (strain ATCC 700721 / MGH 78578) GN=astA PE=3 SV=1	61.6279	16	62	1	344	38.348	5.58	87.6	96.3	84.2	106.4	108.6	117
W1B5U3		Phenylacetate-CoA oxygenase, PaaG subunit OS=Klebsiella pneumoniae IS22 PE=4 SV=1	59.1176	18	69	2	340	38.975	6.39	100.3	101.9	98.8	97.8	103.2	98
W1DGR1		Paraquat-inducible protein B OS=Klebsiella pneumoniae IS43 PE=4 SV=1	59.0723	31	71	7	733	80.573	7.31	108.1	95.6	94	102.2	97.4	102.6
A0A0E1CMA0	KPNJ1_03892	PhoH-like protein OS=Klebsiella pneumoniae 30660/NJST258_1 GN=KPNJ1_03892 PE=4 SV=1	66.6667	19	50	19	348	39.215	6.1	100.6	97.7	97.5	103	101.8	99.4
A0A2D3D1J3	KPH11_06725	3-hydroxyacyl-CoA dehydrogenase PaaC OS=Klebsiella pneumoniae subsp. pneumoniae GN=KPH11_06725 PE=4 SV=1	62.1564	20	59	1	473	50.87	6.25	72.6	103.3	106.6	128.3	105.9	83.3
A0A1Y0Q3T7	serC	Phosphoserine aminotransferase OS=Klebsiella pneumoniae subsp. pneumoniae GN=serC PE=3 SV=1	57.7348	18	73	1	362	39.558	5.87	131.4	134.5	134	69.5	66.6	63.9
A0A1S0WEH1	CTI63_17585	Dimethyl sulfoxide reductase DmsA OS=Klebsiella pneumoniae GN=CTI63_17585 PE=3 SV=1	48.8916	30	65	1	812	89.96	6.8	173.1	179.8	175.2	12.7	42.3	17
A0A181SBK2	cpdB	2',3'-cyclic-nucleotide 2'-phosphodiesterase OS=Klebsiella pneumoniae GN=cpdB PE=3 SV=1	68.4699	28	68	3	647	70.541	6.46	89.7	96.4	96.1	103.6	109.9	104.3
W1DP47	greA	Transcription elongation factor GreA OS=Klebsiella pneumoniae IS43 GN=greA PE=3 SV=1	91.7722	16	78	16	158	17.723	4.84	103.7	103	101.8	96.5	99.1	95.8
R4YCB8	hemL	Glutamate-1-semialdehyde 2,1-aminomutase OS=Klebsiella pneumoniae subsp. rhinoscleromatis SB3432 GN=hemL PE=3 SV=1	53.2864	15	50	2	426	45.24	5.12	95.3	92.3	90.9	102.5	114.6	104.4
A0A060VDP3	sit	Sit protein OS=Klebsiella pneumoniae GN=sit PE=4 SV=1	64.3185	35	83	35	653	74.104	7.5	97.6	95.5	95.7	101.9	106.4	102.9
A0A2D2EI52	CTI52_14305	1,2-phenylacetyl-CoA epoxidase subunit A OS=Klebsiella pneumoniae GN=CTI52_14305 PE=4 SV=1	59.1176	17	66	1	340	38.923	6.24	108.1	109	112.4	89.2	101	80.3
A0A1C3PVX8	dcp	Dipeptidyl carboxypeptidase Dcp OS=Klebsiella pneumoniae GN=dcp PE=3 SV=1	26.8722	13	43	1	681	77.414	5.19	57.4	50.1	54.1	138.1	143.8	156.5
A0A1Y0PSQ2	dhaK	Dihydroxyacetone kinase OS=Klebsiella pneumoniae subsp. pneumoniae GN=dhaK PE=4 SV=1	67.031	25	64	2	549	57.374	5.12	87.6	88.8	89.6	107.4	108	118.6
J2X7V0	UUU_24350	Trehalose-6-phosphate synthase OS=Klebsiella pneumoniae subsp. pneumoniae DSM 30104 GN=UUU_24350 PE=3 SV=1	56.8182	26	85	26	484	54.867	6.86	112	109.3	108.7	89	91.2	89.7
B5XRM5	ldhA	D-lactate dehydrogenase OS=Klebsiella pneumoniae (strain 342) GN=ldhA PE=3 SV=1	55.9271	17	78	1	329	36.37	5.82	68.5	114.3	122	89.5	96.4	109.3
A0A169CXM0	por_2	Putative mannitol dehydrogenase OS=Klebsiella pneumoniae GN=por_2 PE=3 SV=1	63.5246	23	56	6	488	53.779	6.04	96.8	103.6	102	102.3	95.4	99.9
A0A1Y0PXZ2	AN663_12640	Keto-deoxy-phosphogluconate aldolase OS=Klebsiella pneumoniae subsp. pneumoniae GN=AN663_12640 PE=4 SV=1	87.7934	12	52	12	213	22.215	5.63	98.3	100.7	99.1	102.4	100.8	98.7
R4Y3Q4	dnaN	Beta sliding clamp OS=Klebsiella pneumoniae subsp. rhinoscleromatis SB3432 GN=dnaN PE=3 SV=1	58.1967	15	52	15	366	40.456	5.39	95.8	95.8	97.1	105.1	100.5	105.6
B5XZM1	atpH	ATP synthase subunit delta OS=Klebsiella pneumoniae (strain 342) GN=atpH PE=3 SV=1	85.3107	11	51	11	177	19.504	5.05	95.8	96.8	96.7	103.7	104.6	102.4
W1EKT2		Flavodoxin OS=Klebsiella pneumoniae IS53 PE=3 SV=1	64.7727	7	48	1	176	19.753	4.48	89.1	89.2	88	108.9	119.8	105
R4Y5A2	rl15	50S ribosomal protein L15 OS=Klebsiella pneumoniae subsp. rhinoscleromatis SB3432 GN=rl15 PE=3 SV=1	67.3611	11	81	5	144	15.125	11.15	103.9	106.1	104.6	96	95.5	93.9
A0A0J4XVA9	astA	Arginine N-succinyltransferase OS=Klebsiella pneumoniae GN=astA PE=3 SV=1	66.8605	17	56	1	344	38.32	5.48	161.5	179.7	181.6	24.1	29.5	23.6
A0A0E1CIA4	KPNJ1_04219	Membrane protease family, stomatin/prohibitin-like protein OS=Klebsiella pneumoniae 30660/NJST258_1 GN=KPNJ1_04219 PE=4 SV=1	65.6863	13	43	13	306	33.671	5.44	90.3	92.1	91.2	108.4	108.9	109.2
A0A168UVM6	ushA	UDP-sugar hydrolase OS=Klebsiella pneumoniae GN=ushA PE=3 SV=1	68.7273	24	68	1	550	60.507	6.2	108.7	105.7	110.5	93.8	91.2	90.1
W9B788	fabD	Malonyl CoA-acyl carrier protein transacylase OS=Klebsiella pneumoniae GN=fabD PE=3 SV=1	68.932	13	76	1	309	32.321	5.1	109.6	110.7	115.1	88.1	73.1	103.4
A6TEA9	dhaK	Putative dihydroxyacetone kinase, N-terminal domain OS=Klebsiella pneumoniae subsp. pneumoniae (strain ATCC 700721 / MGH 78578) GN=dhaK PE=4 SV=1	67.031	25	64	2	549	57.316	5.12	128.1	130.7	130.7	66.7	73.2	70.4
A0A1W6AL57	blaCTX-M-28	Beta-lactamase (Fragment) OS=Klebsiella pneumoniae GN=blaCTX-M-28 PE=3 SV=1	71.0801	23	99	7	287	30.674	9.51	55.4	46.3	48.4	153.5	147	149.5
A0A060VFJ1	cydA	CydA protein OS=Klebsiella pneumoniae GN=cydA PE=4 SV=1	20.2128	13	71	13	564	62.529	6.74	98.9	97.8	96.3	104.9	99.4	102.7
W9BJT0	dsbA	Thiol:disulfide interchange protein OS=Klebsiella pneumoniae GN=dsbA PE=3 SV=1	63.7681	13	69	1	207	22.917	5.63	84.1	93.4	89.4	127.4	99.6	106.2
A0A085DNW4	pdxB	Erythronate-4-phosphate dehydrogenase OS=Klebsiella pneumoniae GN=pdxB PE=3 SV=1	73.0159	21	68	21	378	41.347	6.7	106.1	107.5	106.3	92.5	95.9	91.6
A0A1Y0Q4K0	fadA	3-ketoacyl-CoA thiolase OS=Klebsiella pneumoniae subsp. pneumoniae GN=fadA PE=3 SV=1	63.8243	16	46	3	387	41.023	6.8	95.8	92.7	90.7	102.1	125.9	92.7
W1DHU5		Thiol peroxidase, Bcp-type OS=Klebsiella pneumoniae IS43 PE=4 SV=1	72.5389	15	85	15	193	21.917	6.73	100.2	102.5	102	102.1	96.1	97.1
A0A2G3S0C8	CS332_05525	4-aminobutyrate--2-oxoglutarate transaminase OS=Klebsiella pneumoniae subsp. pneumoniae GN=CS332_05525 PE=4 SV=1	30.6792	11	55	2	427	45.716	6.76	90	90.6	89.1	111.6	115.7	103.1
A0A2D2EWI6	narH	Nitrate reductase subunit beta OS=Klebsiella pneumoniae GN=narH PE=4 SV=1	68.1018	31	108	2	511	57.929	6.28	72.8	79.1	80.3	116.7	142.4	108.7
A0A2D1HP93	ushA	Bifunctional UDP-sugar hydrolase/5'-nucleotidase OS=Klebsiella pneumoniae subsp. pneumoniae GN=ushA PE=4 SV=1	68.7273	24	69	1	550	60.498	6.2	82.7	71.4	80.6	127.1	117.8	120.4
A0A0E1CCS3	KPNJ1_02234	Respiratory nitrate reductase beta chain OS=Klebsiella pneumoniae 30660/NJST258_1 GN=KPNJ1_02234 PE=4 SV=1	68.1018	31	108	2	511	57.915	6.28	103.3	105.4	111	89.2	96.5	94.7
A0A235WMH8	hslO	33 kDa chaperonin OS=Klebsiella pneumoniae subsp. pneumoniae GN=hslO PE=3 SV=1	59.589	10	36	1	292	32.356	4.53	78.8	85.1	85.9	119.3	110.4	120.5
W1H092	tyrS	Tyrosine--tRNA ligase OS=Klebsiella pneumoniae ISC21 GN=tyrS PE=3 SV=1	70.5189	23	56	1	424	47.205	5.67	142.3	132.5	137.3	57.4	70.2	60.2
V0B0D7	clpP	ATP-dependent Clp protease proteolytic subunit OS=Klebsiella pneumoniae 909957 GN=clpP PE=3 SV=1	45.8763	8	40	8	194	21.678	6.04	100.8	96.2	96.9	98.9	107.7	99.5
A0A2G3S2V5	pfkA	6-phosphofructokinase OS=Klebsiella pneumoniae subsp. pneumoniae GN=pfkA PE=4 SV=1	40.3125	11	58	1	320	34.824	6.02	96.9	105.1	97.4	74.9	134.2	91.4
B5XPZ2	argS	Arginine--tRNA ligase OS=Klebsiella pneumoniae (strain 342) GN=argS PE=3 SV=1	70.7106	32	62	2	577	64.202	5.69	111.5	93.6	85.3	92.7	123	93.8
W8UTT5	KPNJ2_00557	Putative membrane associated protein OS=Klebsiella pneumoniae 30684/NJST258_2 GN=KPNJ2_00557 PE=4 SV=1	72.3881	9	70	9	134	15.315	5.55	101.8	96.9	96.5	100.8	103.9	100.2
A0A2G4YG49	CQB04_11290	ATP-dependent RNA helicase HrpA OS=Klebsiella pneumoniae GN=CQB04_11290 PE=4 SV=1	48.6154	53	75	9	1300	148.741	7.65	108.4	108.2	109.6	89.5	95.2	89.2
A0A080T0I4	tyrS	Tyrosine--tRNA ligase OS=Klebsiella pneumoniae GN=tyrS PE=3 SV=1	70.5189	23	54	1	424	47.221	5.67	84.2	67.2	72.4	124	128.8	123.4
A0A0E1CL53	fadA	3-ketoacyl-CoA thiolase OS=Klebsiella pneumoniae 30660/NJST258_1 GN=fadA PE=3 SV=1	63.8243	16	45	3	387	40.992	6.95	111.6	118.5	119.1	75.7	93.4	81.7
W1AR70		Respiratory nitrate reductase alpha chain OS=Klebsiella pneumoniae IS22 PE=3 SV=1	29.7514	33	89	1	1247	140.37	6.51	111.3	109.8	111.9	93.1	94.4	79.4
W9B852	paaH	PaaH protein OS=Klebsiella pneumoniae GN=paaH PE=4 SV=1	62.8692	21	60	2	474	50.86	6.6	80.1	85.8	88	111.6	117.1	117.5
W8UBN2	KPNJ2_00539	Rod shape-determining protein mreB OS=Klebsiella pneumoniae 30684/NJST258_2 GN=KPNJ2_00539 PE=4 SV=1	55.3763	18	54	18	372	39.532	5.48	102.4	99.8	100.8	98.8	98.9	99.3
W1E907	ispG	4-hydroxy-3-methylbut-2-en-1-yl diphosphate synthase (flavodoxin) OS=Klebsiella pneumoniae IS46 GN=ispG PE=3 SV=1	74.7989	26	59	2	373	40.701	6.71	111.2	109.9	112.7	88.3	91.9	86
A0A1S8YD49	ispG	4-hydroxy-3-methylbut-2-en-1-yl diphosphate synthase (flavodoxin) OS=Klebsiella pneumoniae GN=ispG PE=3 SV=1	74.7989	25	58	1	373	40.715	6.71	78.5	68.1	74.2	130.3	120.3	128.7
B5XNA2	rpmC	50S ribosomal protein L29 OS=Klebsiella pneumoniae (strain 342) GN=rpmC PE=3 SV=1	49.2063	3	32	3	63	7.239	10.27	97.8	99.3	99.2	100.7	102.3	100.7
A0A263K3Y1	selD	Selenide, water dikinase OS=Klebsiella pneumoniae GN=selD PE=3 SV=1	65.4179	12	51	1	347	36.172	5.19	21.9	20.1	23.6	190.7	166.4	177.3
R4YFI9	rplU	50S ribosomal protein L21 OS=Klebsiella pneumoniae subsp. rhinoscleromatis SB3432 GN=rplU PE=3 SV=1	69.9029	7	62	3	103	11.555	9.85	94.9	98.9	101.1	103.9	90.4	110.9
A0A2G3RV36	CS332_15475	LOG family protein OS=Klebsiella pneumoniae subsp. pneumoniae GN=CS332_15475 PE=4 SV=1	38.1057	16	53	1	454	50.687	6.25	87.6	89	100.3	97.2	128	97.9
C8TA43	ydfG2	Oxidoreductase, short chain dehydrogenase/reductase family protein OS=Klebsiella pneumoniae subsp. rhinoscleromatis ATCC 13884 GN=ydfG2 PE=3 SV=1	72.6923	15	54	1	260	28.498	7.15	100.4	102.2	100.8	99.9	99.9	96.8
A0A231WU82	B1727_12205	NAD(P)-dependent oxidoreductase OS=Klebsiella pneumoniae GN=B1727_12205 PE=3 SV=1	79.1667	16	49	3	264	27.321	6.05	88.2	88.6	91.3	110.4	112.5	109
A0A0J4QXT0	glnA	Glutamine synthetase OS=Klebsiella pneumoniae GN=glnA PE=3 SV=1	58.209	20	68	20	469	51.802	5.53	96	94	95.4	103.1	107.6	104
A0A098CF03	hldE	Bifunctional protein HldE OS=Klebsiella pneumoniae GN=hldE PE=3 SV=1	52.2013	19	49	19	477	51.105	5.21	101.7	102.4	102.3	97.7	99.1	96.9
A0A0J4LFF1	SM87_00046	Isocitrate lyase OS=Klebsiella pneumoniae GN=SM87_00046 PE=4 SV=1	66.5148	22	69	1	439	48.4	5.49	137.8	114.2	136.6	71	83.7	56.7
A0A0E1CHG4	KPNJ1_03929	Peroxiredoxin reductase AhpF subunit OS=Klebsiella pneumoniae 30660/NJST258_1 GN=KPNJ1_03929 PE=3 SV=1	60.2687	25	61	25	521	55.984	5.59	90.2	90.2	90.9	112	105.8	110.9
A0A060VEB3	relA	RelA protein OS=Klebsiella pneumoniae GN=relA PE=3 SV=1	52.6385	31	63	31	758	85.531	6.83	102.9	103.8	103.2	94.6	101.9	93.7
A0A169IE48	trpS	Tryptophan--tRNA ligase OS=Klebsiella pneumoniae GN=trpS PE=3 SV=1	71.8563	23	57	23	334	37.495	6.74	91	92.1	93.4	109.4	106.8	107.3
W1AYM7		Corresponds to STY2919 from Accession AL513382: Salmonella typhi CT18 OS=Klebsiella pneumoniae IS22 PE=4 SV=1	84.7458	4	40	4	59	6.406	4.42	102.3	98.4	96.1	96.9	110.5	95.8
W1DY80		Lipoprotein OS=Klebsiella pneumoniae IS46 PE=3 SV=1	78.5211	19	55	1	284	30.91	5.41	119.9	115.5	112.6	81.1	87.6	83.2
A0A060VHG1	add	Adenosine deaminase OS=Klebsiella pneumoniae GN=add PE=3 SV=1	84.6847	17	48	17	333	36.242	5.49	96.8	95.1	94.9	101.5	105.5	106.2
A0A0H3GMZ2	KPHS_07140	Threonine synthase OS=Klebsiella pneumoniae subsp. pneumoniae (strain HS11286) GN=KPHS_07140 PE=4 SV=1	68.7793	21	57	21	426	46.65	5.72	96.6	98.8	100	102.5	102.2	99.9
A0A1W1K0P2	dcp	Dipeptidyl carboxypeptidase Dcp OS=Klebsiella pneumoniae GN=dcp PE=3 SV=1	23.348	11	38	1	681	77.307	5.44
A0A1S0W4F1	CTI63_24155	Acyl-CoA dehydrogenase OS=Klebsiella pneumoniae GN=CTI63_24155 PE=3 SV=1	53.945	21	59	1	545	60.582	8.21	90.8	104.8	89.9	102.5	109.9	102.2
W1BE61		UPF0325 protein OS=Klebsiella pneumoniae IS22 PE=3 SV=1	80.4688	15	76	15	128	15.087	7.18	97.5	97.1	97.3	105.4	99.6	103.1
J2DK56	UUU_21840	Putative ABC transporter periplasmic binding protein OS=Klebsiella pneumoniae subsp. pneumoniae DSM 30104 GN=UUU_21840 PE=4 SV=1	83.4254	26	76	2	362	39.522	5.85	99.6	97.7	92.4	103.6	106.4	100.4
A0A0E1CD69	KPNJ1_02220	Intracellular sulfur reduction protein OS=Klebsiella pneumoniae 30660/NJST258_1 GN=KPNJ1_02220 PE=4 SV=1	81.1966	5	41	1	117	12.569	5.11	89.7	92.6	98.2	108.7	104.8	106
W1BHF3	htpG	Chaperone protein HtpG OS=Klebsiella pneumoniae IS22 GN=htpG PE=3 SV=1	29.9679	19	68	2	624	71.378	5.21	108.4	94.8	91.8	99.1	106.8	99.1
A0A181WUD2	BCB67_00335	Oxidoreductase OS=Klebsiella pneumoniae GN=BCB67_00335 PE=3 SV=1	80.303	16	52	0	264	27.331	5.68
A0A0E1CHP2	KPNJ1_03820	UDP-glucose 4-epimerase OS=Klebsiella pneumoniae 30660/NJST258_1 GN=KPNJ1_03820 PE=4 SV=1	74.1477	16	66	3	352	38.587	6.15	104.4	106.4	109.9	90	97.2	92.1
R4YH55	KPR_3911	Uncharacterized protein OS=Klebsiella pneumoniae subsp. rhinoscleromatis SB3432 GN=KPR_3911 PE=3 SV=1	56.7376	21	79	20	423	46.589	8.68	101.3	99	99.3	99.9	100.8	99.7
W1DST4		Phenylacetate-CoA oxygenase, PaaG subunit OS=Klebsiella pneumoniae IS43 PE=4 SV=1	56.4246	18	64	3	358	41.189	7.06	94.4	95.9	93.3	104.3	100.3	111.8
W9BBU9	ligA	DNA ligase OS=Klebsiella pneumoniae GN=ligA PE=3 SV=1	67.0641	35	73	35	671	73.561	5.86	99.4	99.8	99.8	98.4	102.8	99.7
A0A2D2PJS6	CR231_04415	C-lysozyme inhibitor OS=Klebsiella pneumoniae GN=CR231_04415 PE=4 SV=1	63.4286	8	62	2	175	18.712	5.71	76.6	70	75.6	129.2	121.6	126.9
A0A1Y0Q1U7	astA	Arginine N-succinyltransferase OS=Klebsiella pneumoniae subsp. pneumoniae GN=astA PE=3 SV=1	65.407	17	54	1	344	38.324	5.73	121.7	128.2	119.6	71.4	91	68.2
A0A2G3RW71	CS332_13005	Valine--tRNA ligase OS=Klebsiella pneumoniae subsp. pneumoniae GN=CS332_13005 PE=4 SV=1	38.4858	36	83	2	951	108.22	5.29	109	108.3	106	87.6	97	92.1
A0A0C7KDZ8	fabG_1	3-oxoacyl-[acyl-carrier-protein] reductase FabG OS=Klebsiella pneumoniae GN=fabG_1 PE=3 SV=1	80.303	16	51	0	264	27.304	5.68
W9B1H5	ghrB	Glyoxylate/hydroxypyruvate reductase B OS=Klebsiella pneumoniae GN=ghrB PE=3 SV=1	69.3498	16	58	1	323	35.409	6.35	133.8	135.9	130.2	71.1	61.3	67.8
A0A1B2ZSZ6	BCB67_13290	3-hydroxyacyl-CoA dehydrogenase PaaC OS=Klebsiella pneumoniae GN=BCB67_13290 PE=4 SV=1	63.0021	21	58	1	473	50.772	6.48	189.7	181.6	184.3	15	15.1	14.4
A0A2G8ABE8	C630_24385	3'(2'),5'-bisphosphate nucleotidase CysQ OS=Klebsiella pneumoniae subsp. pneumoniae KpO3210 GN=C630_24385 PE=4 SV=1	80.9717	14	64	1	247	27.352	5.6	108.7	100.5	105.2	97.4	93.6	94.5
W1BH53		Thioredoxin reductase OS=Klebsiella pneumoniae IS22 PE=3 SV=1	57.9439	10	44	1	321	34.601	5.5	94	92.7	95	99.8	97	121.5
A0A0H3GH98	KPHS_04270	Isovaleryl CoA dehydrogenase OS=Klebsiella pneumoniae subsp. pneumoniae (strain HS11286) GN=KPHS_04270 PE=3 SV=1	53.945	21	58	1	545	60.596	8.21	79.4	96.1	70.3	123.2	75.4	155.6
A0A1Y0Q858	B5K12_18830	Tellurium resistance protein TerX OS=Klebsiella pneumoniae subsp. pneumoniae GN=B5K12_18830 PE=4 SV=1	85.446	16	65	1	213	23.496	5.99	114.4	120.2	125.6	81.6	75.1	83
A0A060VQX6	ppk	Polyphosphate kinase OS=Klebsiella pneumoniae GN=ppk PE=3 SV=1	53.7901	35	78	35	686	80.107	8.47	96	95.9	95.6	103.4	104.4	104.7
A0A235RU13	AN663_03765	Glutathione-disulfide reductase OS=Klebsiella pneumoniae subsp. pneumoniae GN=AN663_03765 PE=3 SV=1	68.2222	21	74	1	450	48.631	6.24	90.3	97.2	102.5	105.6	103.1	101.3
A0A1B3A2L4	uxuA	Mannonate dehydratase OS=Klebsiella pneumoniae GN=uxuA PE=3 SV=1	86.8687	27	74	3	396	44.708	5.81	100.5	106.6	106.2	93.2	95.2	98.2
A0A060VMQ8	ydcJ	YdcJ protein OS=Klebsiella pneumoniae GN=ydcJ PE=4 SV=1	57.9418	23	66	23	447	50.658	6.04	95.5	93.7	93.5	103.4	109.6	104.2
A0A1B2ZRT2	BCB67_19760	Glutathione-disulfide reductase OS=Klebsiella pneumoniae GN=BCB67_19760 PE=3 SV=1	68.2222	21	70	1	450	48.661	6.24	150.2	160.1	164.9	42	43.6	39.2
A0A0E1CH47	KPNJ1_02092	PTS system, mannose-specific IID component OS=Klebsiella pneumoniae 30660/NJST258_1 GN=KPNJ1_02092 PE=4 SV=1	39.8601	11	58	11	286	31.239	9.42	109.8	110.7	110	88.7	92.9	87.9
W9BBH5	metQ2	Lipoprotein OS=Klebsiella pneumoniae GN=metQ2 PE=3 SV=1	82.2878	19	53	1	271	29.356	5.26	85.9	63.3	54.3	115.9	141.1	139.4
P52671	udp	Uridine phosphorylase OS=Klebsiella pneumoniae GN=udp PE=3 SV=1	44.8029	10	70	2	279	30.255	7.05	101.8	104.6	106	94.2	94.9	98.4
A0A1Y0Q2Y6	B5K12_10415	Flavodoxin OS=Klebsiella pneumoniae subsp. pneumoniae GN=B5K12_10415 PE=3 SV=1	64.7727	7	42	1	176	19.767	4.48	128.7	134.7	133.1	70	70.6	62.8
A0A218N2M2		AacA4 OS=Klebsiella pneumoniae PE=4 SV=1	48.7437	7	51	1	199	22.039	5.02	75.4	70.1	70.9	122.4	134.7	126.4
A0A060VFH0	ppiB	Peptidyl-prolyl cis-trans isomerase OS=Klebsiella pneumoniae GN=ppiB PE=3 SV=1	45.1163	10	74	5	215	23.915	7.56	98.4	100.7	100.5	103.1	96.6	100.6
A0A0H3GS77	KPHS_34400	Cytoplasmic alpha-amylase OS=Klebsiella pneumoniae subsp. pneumoniae (strain HS11286) GN=KPHS_34400 PE=4 SV=1	47.0817	18	58	2	514	58.238	4.63	129.6	136	132.4	66.3	69.6	66.1
A0A1Y0Q5P0	AN663_20525	CoA-binding protein OS=Klebsiella pneumoniae subsp. pneumoniae GN=AN663_20525 PE=4 SV=1	91.2409	11	54	1	137	14.707	7.18	92.7	92.5	96.8	102.6	103.6	111.8
A0A169ENY4	uxuA_1	Mannonate dehydratase OS=Klebsiella pneumoniae GN=uxuA_1 PE=3 SV=1	85.101	25	71	1	396	44.756	5.81	54.9	40.9	44.8	156.4	157.1	145.9
A0A0E1C8Z2	KPNJ1_00884	Uncharacterized protein OS=Klebsiella pneumoniae 30660/NJST258_1 GN=KPNJ1_00884 PE=4 SV=1	45.098	14	79	14	255	27.081	7.55	98.9	99.5	99.1	103.9	97.9	100.7
A0A0E1CGB0	KPNJ1_03531	CoA binding protein OS=Klebsiella pneumoniae 30660/NJST258_1 GN=KPNJ1_03531 PE=4 SV=1	91.2409	11	54	1	137	14.734	7.18	137.7	139.2	135.8	53	76.3	58.1
V0B805	HMPREF1619_01345	Fimbrial protein OS=Klebsiella pneumoniae 909957 GN=HMPREF1619_01345 PE=4 SV=1	62.7451	8	51	8	204	20.938	5.5	82.6	85.5	86.7	116.6	110.9	117.7
A0A2G3RZA5	tkt	Transketolase OS=Klebsiella pneumoniae subsp. pneumoniae GN=tkt PE=4 SV=1	15.6627	7	66	2	664	72.897	6.29	111.3	99.9	95.4	90.4	102	101
A0A2D2F0N9	CR231_05515	Carbonate dehydratase OS=Klebsiella pneumoniae GN=CR231_05515 PE=4 SV=1	46.7039	31	57	1	895	97.203	5.97	85.3	93.5	99	112.1	105.4	104.8
A0A1E3FAZ5	glgA	Glycogen synthase OS=Klebsiella pneumoniae GN=glgA PE=3 SV=1	41.0901	16	59	16	477	52.957	6.48	104.3	102.7	101.7	96.1	99.4	95.7
C9K1J5	manC	Mannose-1-phosphate guanylyltransferase OS=Klebsiella pneumoniae GN=manC PE=3 SV=1	62.4204	19	65	3	471	52.859	5.6	108.3	103.3	107.3	96.6	96.6	87.9
A0A1Y0PS53	ghrB	Glyoxylate/hydroxypyruvate reductase B OS=Klebsiella pneumoniae subsp. pneumoniae GN=ghrB PE=3 SV=1	69.3498	16	57	1	323	35.41	6.23	116.7	129.6	127.9	75.4	78.6	71.9
A0A237R6H9	CI704_12125	Alpha-amylase OS=Klebsiella pneumoniae subsp. pneumoniae GN=CI704_12125 PE=4 SV=1	48.6869	17	54	1	495	56.248	4.58	54.5	57.7	60.2	153.3	131.7	142.6
A0A2D2GDA1	dnaJ	Molecular chaperone DnaJ OS=Klebsiella pneumoniae GN=dnaJ PE=4 SV=1	64.4562	20	69	20	377	40.997	8	102.6	101.8	101.8	98.1	98.4	97.4
G7RVH5	aac(6)-1b-cr	Aminoglycoside N(6 )-acetyltransferase OS=Klebsiella pneumoniae GN=aac(6)-1b-cr PE=4 SV=1	42.1739	7	52	1	230	25.586	5.44	61.8	65	67.6	132.1	143.5	129.9
A0A193SFG5	manC	Mannose-1-phosphate guanylyltransferase OS=Klebsiella pneumoniae GN=manC PE=3 SV=1	62.4204	19	62	2	471	52.848	5.52	122.8	123.7	116.7	74.8	87.4	74.5
A0A2A2NI24	CKJ89_28255	Bifunctional NADP-dependent 3-hydroxy acid dehydrogenase/3-hydroxypropionate dehydrogenase YdfG OS=Klebsiella pneumoniae GN=CKJ89_28255 PE=3 SV=1	75.9036	15	50	1	249	27.242	6.06	127.1	121	128.4	76.2	80.8	66.5
A0A2D2FEI6	CTI55_15265	Arginine N-succinyltransferase OS=Klebsiella pneumoniae GN=CTI55_15265 PE=4 SV=1	66.8605	17	53	1	344	38.353	5.48	115.3	112	95.5	73.2	105.7	98.4
A0A2G4Q3W8	BB785_04130	Glutathione synthase OS=Klebsiella pneumoniae GN=BB785_04130 PE=4 SV=1	82.2785	19	60	2	316	35.527	5.33	93.2	96.7	103.3	104.4	101.9	100.6
A0A060VFZ0	KpST82_1517	Uncharacterized protein OS=Klebsiella pneumoniae GN=KpST82_1517 PE=4 SV=1	46.7039	31	55	1	895	97.204	5.87	113.6	115.8	117.7	83.5	84.1	85.4
A0A2G4PRR9	CS372_28320	C-lysozyme inhibitor OS=Klebsiella pneumoniae GN=CS372_28320 PE=4 SV=1	63.4286	8	59	2	175	18.754	5.71	111.7	117.6	120.1	85.9	79.6	85.1
W9BB58	asmA	AsmA protein OS=Klebsiella pneumoniae GN=asmA PE=4 SV=1	49.7561	21	47	10	615	68.662	5.74	105.4	95.7	94.9	96.4	108	99.6
A0A060VJK1	mutS	DNA mismatch repair protein MutS OS=Klebsiella pneumoniae GN=mutS PE=3 SV=1	51.9343	33	50	33	853	95.022	5.77	105.6	103.4	102.9	94.1	99	95
W1AZE2	accD	Acetyl-coenzyme A carboxylase carboxyl transferase subunit beta OS=Klebsiella pneumoniae IS22 GN=accD PE=3 SV=1	51.9878	16	61	1	327	35.704	6.9	90.8	87.1	91.4	107.8	106.8	116.1
A0A1Y0Q4B8	rapA	RNA polymerase-associated protein RapA OS=Klebsiella pneumoniae subsp. pneumoniae GN=rapA PE=3 SV=1	58.6777	39	74	39	968	109.535	5.24	100.9	98.3	98	99.5	103.4	99.9
A0A164JY44	hslO	33 kDa chaperonin OS=Klebsiella pneumoniae GN=hslO PE=3 SV=1	59.589	10	35	1	292	32.384	4.53	39.8	41.1	41.1	161	159.1	158
C8TCI4	iolG	Inositol 2-dehydrogenase OS=Klebsiella pneumoniae subsp. rhinoscleromatis ATCC 13884 GN=iolG PE=3 SV=1	53.719	17	51	17	363	39.829	6.46	99.2	97.9	97	104.1	102.7	99.1
W1DKV0		Nucleoside-specific channel-forming protein Tsx OS=Klebsiella pneumoniae IS43 PE=4 SV=1	34.8974	9	65	9	341	39.084	6.04	85	86.1	85.2	116.1	113.9	113.7
W1B565		GTP-binding protein TypA/BipA OS=Klebsiella pneumoniae IS22 PE=4 SV=1	39.7035	18	65	1	607	67.313	5.33	77.8	80.8	79.5	123.6	107.3	131
A0A2A5PMT7	CP995_27930	Arginine ABC transporter substrate-binding protein (Fragment) OS=Klebsiella pneumoniae GN=CP995_27930 PE=4 SV=1	93.1034	7	44	1	87	9.543	4.56	94.2	87.6	82.5	118	110.8	106.9
W1AT75	srmB	ATP-dependent RNA helicase SrmB OS=Klebsiella pneumoniae IS22 GN=srmB PE=3 SV=1	62.754	24	61	24	443	49.696	9.17	99.8	100.5	100.7	98.9	102.6	97.4
W8UF93	rpiA	Ribose-5-phosphate isomerase A OS=Klebsiella pneumoniae 30684/NJST258_2 GN=rpiA PE=3 SV=1	57.9592	11	56	11	245	25.639	6.34	95.5	96.8	95.7	104.6	105.6	101.7
A0A1S8YAG1	BU230_29510	L-serine ammonia-lyase OS=Klebsiella pneumoniae GN=BU230_29510 PE=4 SV=1	51.5419	20	73	18	454	48.994	5.43	84.8	82.9	81.6	118.5	116.4	115.8
A0A2D2G7X9	narH	Nitrate reductase subunit beta OS=Klebsiella pneumoniae GN=narH PE=4 SV=1	67.8988	28	69	3	514	58.401	6.35	122	122.8	124.3	78.7	78.5	73.6
W8UBP9	rplM	50S ribosomal protein L13 OS=Klebsiella pneumoniae 30684/NJST258_2 GN=rplM PE=3 SV=1	63.4731	12	113	4	167	19.014	9.74	94.9	100.2	100.2	102.2	96.5	106
W1DMJ1		Nucleoid-associated protein OS=Klebsiella pneumoniae IS43 PE=3 SV=1	90	8	52	8	110	12.048	5.07	96.9	97.5	97.6	102.8	102.1	103.1
A0A098C6P4	AGG09_20325	Oxidoreductase OS=Klebsiella pneumoniae GN=AGG09_20325 PE=3 SV=1	73.8636	15	47	0	264	27.359	5.68
W1E6R2		L-proline glycine betaine binding ABC transporter protein ProX (TC 3.A.1.12.1) OS=Klebsiella pneumoniae IS46 PE=4 SV=1	62.3494	13	61	1	332	36.164	6.23	100.6	94.4	101.7	86.8	129.3	87.2
A0A060VI44	nusG	Transcription termination/antitermination protein NusG OS=Klebsiella pneumoniae GN=nusG PE=3 SV=1	68.5083	11	54	11	181	20.562	6.81	97	101.7	102.7	99.5	103.8	95.2
A0A0E1CFS1	KPNJ1_03326	Outer membrane protein OS=Klebsiella pneumoniae 30660/NJST258_1 GN=KPNJ1_03326 PE=4 SV=1	60.7843	9	44	9	255	28.791	5.6	84.2	84.7	86.4	116.5	115.6	112.6
W1H3S1	cbpA	Curved DNA-binding protein OS=Klebsiella pneumoniae ISC21 GN=cbpA PE=3 SV=1	65.5738	19	73	1	305	34.411	7.36	63.1	67.5	69.3	141.1	125.7	133.2
B5XRJ5	paaH	3-hydroxybutyryl-CoA dehydrogenase PaaH OS=Klebsiella pneumoniae (strain 342) GN=paaH PE=4 SV=1	52.8541	17	51	1	473	50.716	6.32	106.2	109.7	102.5	94.2	91.5	96
A0A060VKH8	cbpA	Curved DNA-binding protein OS=Klebsiella pneumoniae GN=cbpA PE=3 SV=1	65.5738	19	71	1	305	34.437	7.36	118	120.6	125.2	87.2	71.9	77.1
A0A170CV75	galE	UDP-galactose-4-epimerase OS=Klebsiella pneumoniae GN=galE PE=4 SV=1	76.9231	15	64	2	338	36.953	6.14	38.8	40.6	50.2	141.6	158.3	170.5
A0A0J4XED1	kbl	2-amino-3-ketobutyrate coenzyme A ligase OS=Klebsiella pneumoniae GN=kbl PE=3 SV=1	54.6599	17	83	17	397	43.129	6.11	100.9	100.4	98.6	101.2	100.2	98.7
A0A2D1HJG8	AN663_14460	Iron ABC transporter substrate-binding protein OS=Klebsiella pneumoniae subsp. pneumoniae GN=AN663_14460 PE=4 SV=1	83.4254	26	74	2	362	39.566	5.85	106.2	92.8	92.9	107.1	102.1	98.9
A0A231WU76	fadI	3-ketoacyl-CoA thiolase OS=Klebsiella pneumoniae GN=fadI PE=3 SV=1	73.8532	23	50	23	436	46.474	8.27	107.5	107	106.9	90.7	97.2	90.7
A0A169T8Z0	accD_1	Acetyl-coenzyme A carboxylase carboxyl transferase subunit beta OS=Klebsiella pneumoniae GN=accD_1 PE=3 SV=1	51.9878	16	61	1	327	35.706	6.9	95.8	85	88.6	102.3	118.9	109.3
A0A2D3CPP6	KPH11_04505	Nitrate reductase subunit beta OS=Klebsiella pneumoniae subsp. pneumoniae GN=KPH11_04505 PE=4 SV=1	67.7043	27	66	2	514	58.375	6.24	66	55.9	53.3	145	140.4	139.3
W1G8M2	grpE	Protein GrpE OS=Klebsiella pneumoniae ISC21 GN=grpE PE=3 SV=1	85.2941	16	75	2	204	22.726	4.89	97.8	100.6	102.7	102.3	98.1	98.5
A0A0C7K8G0	fadJ	Fatty acid oxidation complex subunit alpha OS=Klebsiella pneumoniae GN=fadJ PE=3 SV=1	54.3417	33	69	33	714	77.324	9.22	113.3	114.6	113.2	84.8	90.1	84.1
R4Y6M1	iscS	Cysteine desulfurase IscS OS=Klebsiella pneumoniae subsp. rhinoscleromatis SB3432 GN=iscS PE=3 SV=1	70.0495	21	59	21	404	45.074	6.18	94.9	93.1	93.6	106.7	105.1	106.5
A0A1S0WBQ8	SM57_02087	Periplasmic murein peptide-binding protein OS=Klebsiella pneumoniae GN=SM57_02087 PE=4 SV=1	63.0112	23	70	1	538	59.635	8.82	112.6	125	125.5	79.5	79.6	77.8
A0A0E1CFF4	KPNJ1_03184	Uncharacterized protein OS=Klebsiella pneumoniae 30660/NJST258_1 GN=KPNJ1_03184 PE=4 SV=1	63.0112	23	69	1	538	59.593	8.82	87.9	76.4	86.9	117.8	129.4	101.6
A0A168MX30	lhgO	L-2-hydroxyglutarate oxidase LhgO OS=Klebsiella pneumoniae GN=lhgO PE=3 SV=1	71.09	24	55	3	422	45.711	8.98	85.1	76.9	75	113.4	136.5	113.1
W1HUQ4	rpsJ	30S ribosomal protein S10 OS=Klebsiella pneumoniae IS39 GN=rpsJ PE=3 SV=1	74.7573	11	54	11	103	11.759	9.86	96.4	96.2	96.8	104.7	99.5	106.4
W9BDB9	cysQ	3'(2'),5'-bisphosphate nucleotidase CysQ OS=Klebsiella pneumoniae GN=cysQ PE=4 SV=1	80.9717	14	64	1	247	27.336	5.6	105.8	109.3	106.5	82.6	105.2	90.6
A0A1Y0Q2I1	B5K12_10450	PTS N-acetyl glucosamine transporter subunit IIABC OS=Klebsiella pneumoniae subsp. pneumoniae GN=B5K12_10450 PE=4 SV=1	36.2519	15	47	2	651	68.124	6.95	132.4	138.6	141.6	58.9	65.8	62.6
C8T6S1	phoP	Transcriptional regulatory protein PhoP OS=Klebsiella pneumoniae subsp. rhinoscleromatis ATCC 13884 GN=phoP PE=4 SV=1	81.6667	15	47	15	240	27.366	6.24	94.4	93.8	94.2	105	106.8	105.8
A0A0E1CAX2	lepA	Elongation factor 4 OS=Klebsiella pneumoniae 30660/NJST258_1 GN=lepA PE=3 SV=1	60.1002	26	58	26	599	66.363	5.59	100.2	96.9	96.8	102.5	102.5	101
A0A1Y0Q3R6	lhgO	L-2-hydroxyglutarate oxidase LhgO OS=Klebsiella pneumoniae subsp. pneumoniae GN=lhgO PE=3 SV=1	71.09	24	54	1	422	45.635	8.98	146.9	147.7	146.9	53.4	52.7	52.4
W8UT80	asd	Aspartate-semialdehyde dehydrogenase OS=Klebsiella pneumoniae 30684/NJST258_2 GN=asd PE=3 SV=1	76.0417	18	55	18	384	41.614	5.72	100.5	104	103.3	98.5	97.1	96.6
A0A2D2EMT8	CTI52_23395	Glycosyl transferase family 1 OS=Klebsiella pneumoniae GN=CTI52_23395 PE=4 SV=1	48.3784	28	72	2	740	84.366	6.51	122.6	100.3	89	91.5	118.9	77.7
A0A0E1CH53	KPNJ1_03640	Putrescine-binding periplasmic protein OS=Klebsiella pneumoniae 30660/NJST258_1 GN=KPNJ1_03640 PE=3 SV=1	55.5851	15	47	15	376	41.653	8.21	102.9	109.2	110.4	94.5	91.3	91.8
A0A1Y0PYV0	B5K12_02985	Murein L,D-transpeptidase OS=Klebsiella pneumoniae subsp. pneumoniae GN=B5K12_02985 PE=4 SV=1	67.9878	18	64	2	328	35.301	9.04	93.3	80.8	91.1	105.6	108	121.1
A0A2G3RWS1	CS332_10870	Threonine--tRNA ligase OS=Klebsiella pneumoniae subsp. pneumoniae GN=CS332_10870 PE=4 SV=1	48.1308	30	86	1	642	73.898	6.13	92.6	111.1	113.3	85.5	104.1	93.4
A0A164MDS0	ynhG	L,D-transpeptidase YnhG OS=Klebsiella pneumoniae GN=ynhG PE=4 SV=1	67.9878	17	65	1	328	35.285	9.04	92.5	77.5	81.9	97.4	116.6	134.2
W1BGB6	glyS	Glycine--tRNA ligase beta subunit OS=Klebsiella pneumoniae IS22 GN=glyS PE=3 SV=1	39.1872	24	53	4	689	76.765	5.44	95.6	85.2	85.3	106.4	113.7	113.7
A0A0E1CBF2	mtlD	Mannitol-1-phosphate 5-dehydrogenase OS=Klebsiella pneumoniae 30660/NJST258_1 GN=mtlD PE=3 SV=1	73.6434	22	74	16	387	41.72	5.81	107.8	103.2	101.2	93.1	101.1	93.7
A0A2D2PT50	CR231_20280	Penicillin-binding protein activator OS=Klebsiella pneumoniae GN=CR231_20280 PE=4 SV=1	46.0114	25	50	25	702	74.977	6.33	99.5	97.7	96.8	100.1	109.4	96.5
A0A2G3RTS7	CS332_17020	ABC transporter substrate-binding protein OS=Klebsiella pneumoniae subsp. pneumoniae GN=CS332_17020 PE=4 SV=1	37.1963	16	66	5	535	60.197	6.58	90.4	99.7	91	97.5	120.1	101.2
R4YGR5	oxaA	Membrane protein insertase YidC OS=Klebsiella pneumoniae subsp. rhinoscleromatis SB3432 GN=oxaA PE=3 SV=1	39.0511	17	51	17	548	61.452	9.04	104.6	103.9	105.4	96.5	95.9	93.7
A0A060VLS7	tyrR	TyrR protein OS=Klebsiella pneumoniae GN=tyrR PE=4 SV=1	75.6286	30	68	17	517	57.806	6.43	103.1	103	102.3	94.8	98.9	97.9
A0A2A2NL60	CKJ89_19360	Glutathione transferase GstA (Fragment) OS=Klebsiella pneumoniae GN=CKJ89_19360 PE=4 SV=1	88.9831	7	49	1	118	13.187	5.19	138.4	155.7	154.5	51.2	53	47.2
C8T1I4	nagE	PTS system, N-acetylglucosamine-specific IIBC component OS=Klebsiella pneumoniae subsp. rhinoscleromatis ATCC 13884 GN=nagE PE=4 SV=1	36.2519	15	48	2	651	68.095	7.2	106.2	109.1	109.4	92.7	92.6	90
A0A1C1MFA9	der	GTPase Der OS=Klebsiella pneumoniae GN=der PE=3 SV=1	66.8699	26	52	26	492	55.165	6.01	102.5	101.1	101.7	97.1	98.5	99
A0A2G3RSE2	CS332_23005	Inorganic diphosphatase OS=Klebsiella pneumoniae subsp. pneumoniae GN=CS332_23005 PE=4 SV=1	59.6591	12	84	12	176	19.652	5.07	96.7	101.9	101.9	102.2	99.4	97.8
A0A1C3Q160	engD	Ribosome-binding ATPase YchF OS=Klebsiella pneumoniae GN=engD PE=3 SV=1	49.5868	14	54	14	363	39.584	4.93	104.2	103.4	104.6	96.4	98.5	92.8
A0A0H3GX45	KPHS_40830	Glycine/betaine/proline transport system periplasmic binding component OS=Klebsiella pneumoniae subsp. pneumoniae (strain HS11286) GN=KPHS_40830 PE=4 SV=1	62.3494	13	59	1	332	36.15	6.23	101.4	97.9	99.2	97.5	106.3	97.7
A0A2G5BN33	CAK82_26595	Glycosyl transferase family 1 OS=Klebsiella pneumoniae GN=CAK82_26595 PE=4 SV=1	50.8108	29	72	3	740	84.369	6.43	104	109.9	111.2	85.6	96	93.2
V0APM5	glnS	Glutamine--tRNA ligase OS=Klebsiella pneumoniae 909957 GN=glnS PE=3 SV=1	65.4054	31	74	2	555	63.572	5.78	81.8	92	90.7	114.6	110.8	110.1
A0A2A2NN97	CKJ89_09015	Stringent starvation protein A OS=Klebsiella pneumoniae GN=CKJ89_09015 PE=3 SV=1	62.2642	10	70	1	212	24.159	5.33	85.4	100	104.7	115.1	89	105.8
W1EF35		Tail-specific protease OS=Klebsiella pneumoniae IS53 PE=3 SV=1	52.7221	27	60	27	698	78.349	6.61	97.9	98.5	98.3	100.7	106.1	98.6
Q6U658	terX	TerX OS=Klebsiella pneumoniae GN=terX PE=4 SV=1	85.446	16	61	1	213	23.524	5.99	163	145.3	157.4	40.1	57.2	37.1
A0A1B2ZE02	gldA	Glycerol dehydrogenase OS=Klebsiella pneumoniae GN=gldA PE=4 SV=1	47.4114	12	38	12	367	38.68	5.03	84.1	85.7	86.2	113.3	115.1	115.6
W9B888	BN49_2588	NAD(P) transhydrogenase subunit alpha OS=Klebsiella pneumoniae GN=BN49_2588 PE=3 SV=1	57.7652	20	58	20	528	56.262	6.89	103.3	105.5	105.8	94.2	97.7	93.5
V0AF62	btuE	Thioredoxin/glutathione peroxidase BtuE OS=Klebsiella pneumoniae 909957 GN=btuE PE=3 SV=1	85.2459	12	55	12	183	20.096	4.96	102.4	106.3	104.1	97.9	94.6	94.7
A0A237QZT7	glnS	Glutamine--tRNA ligase OS=Klebsiella pneumoniae subsp. pneumoniae GN=glnS PE=3 SV=1	65.4054	31	73	2	555	63.559	5.78	148.6	138.7	152.7	47.2	58.6	54.1
A0A060VJ40	KpST82_0019	Uncharacterized protein OS=Klebsiella pneumoniae GN=KpST82_0019 PE=4 SV=1	53.605	12	55	12	319	35.06	7.15	95.5	95	94.9	104.5	106.4	103.7
A0A2A2NGK8	hflB	ATP-dependent metalloprotease (Fragment) OS=Klebsiella pneumoniae GN=hflB PE=4 SV=1	77.9412	13	62	1	204	22.584	5.12	110.8	99.9	91.1	64	135.8	98.4
W1GYN2		Hypothetical lipoprotein YajG OS=Klebsiella pneumoniae ISC21 PE=4 SV=1	51.9231	8	48	8	260	28.494	9.19	99.2	100.7	100.2	101.2	101	97.7
R4YHB7	yniA	YniA protein OS=Klebsiella pneumoniae subsp. rhinoscleromatis SB3432 GN=yniA PE=4 SV=1	71.9064	14	40	14	299	34.238	4.94	98.4	101.1	101.5	100	98.5	100.5
W1APY7		Membrane alanine aminopeptidase N OS=Klebsiella pneumoniae IS22 PE=4 SV=1	28.8506	19	59	1	870	98.857	5.31	115.1	117.1	113.1	88.7	87.6	78.5
A0A2G4RT00	astE	Succinylglutamate desuccinylase OS=Klebsiella pneumoniae GN=astE PE=4 SV=1	71.6511	17	41	2	321	36.503	7.34	106.7	112.5	119.8	83	95.1	82.9
A0A2D3CLJ1	BMF28_23480	Paraquat-inducible protein B OS=Klebsiella pneumoniae GN=BMF28_23480 PE=4 SV=1	67.156	25	57	1	545	60.139	8.47	109.5	106	102.4	91.7	104.4	86
W9BF00	moeA	MoeA protein OS=Klebsiella pneumoniae GN=moeA PE=4 SV=1	45.9854	10	23	2	411	43.969	5.69	105.4	101.8	105.2	83	105	99.6
A0A0P0YPS5	gmd	GDP-mannose 4,6-dehydratase OS=Klebsiella pneumoniae subsp. pneumoniae NTUH-K2044 GN=gmd PE=3 SV=1	63.9687	19	52	1	383	43.394	6.05	168.5	173.5	169.4	26.7	29.9	32
A0A2D1HK03	AN663_15265	DUF3313 domain-containing protein OS=Klebsiella pneumoniae subsp. pneumoniae GN=AN663_15265 PE=4 SV=1	73.4234	10	52	1	222	24.264	8.76	137.4	155.8	147.3	64.2	51.8	43.5
A0A1W1K2C4	SAMEA4362597_00247	ATP-dependent helicase hrpA OS=Klebsiella pneumoniae GN=SAMEA4362597_00247 PE=4 SV=1	41.9231	46	65	2	1300	148.839	7.52	107.4	114.3	112.5	87.6	89.7	88.6
A0A231WU91	astE	Succinylglutamate desuccinylase OS=Klebsiella pneumoniae GN=astE PE=3 SV=1	71.6511	17	40	2	321	36.51	7.15	94.2	91.6	94.8	95.5	111.8	112.1
W1EJW5		Uncharacterized protein OS=Klebsiella pneumoniae IS53 PE=4 SV=1	82.6667	4	35	4	75	8.557	4.63	93.5	96.5	97.2	105.3	100.7	106.9
A0A060VGX9	CAK82_20785	UPF0229 protein KpST82_1894 OS=Klebsiella pneumoniae GN=CAK82_20785 PE=3 SV=1	61.3583	20	58	20	427	49.344	7.2	98.7	97.4	97.1	100.3	105.9	100.5
W8UH95	KPNJ2_02489	Tensin OS=Klebsiella pneumoniae 30684/NJST258_2 GN=KPNJ2_02489 PE=4 SV=1	67.3554	10	53	1	242	26.621	8.9	103.2	107.6	114	98.3	94.1	82.8
W1ASV5	rpsK	30S ribosomal protein S11 OS=Klebsiella pneumoniae IS22 GN=rpsK PE=3 SV=1	64.7059	9	63	9	136	14.568	11.33	102	97.1	96.1	102.3	98.3	104.1
R4YIL5	cysS	Cysteine--tRNA ligase OS=Klebsiella pneumoniae subsp. rhinoscleromatis SB3432 GN=cysS PE=3 SV=1	60.3037	25	61	3	461	52.134	5.57	103.9	103.2	105.3	90.9	101.2	95.5
A0A1W1QS89	proA_1	Gamma-glutamyl phosphate reductase OS=Klebsiella pneumoniae GN=proA_1 PE=3 SV=1	68.3453	21	45	1	417	44.768	5.74	86	81.4	82.9	108.1	132.5	109.1
A0A060VF39	proA	Gamma-glutamyl phosphate reductase OS=Klebsiella pneumoniae GN=proA PE=3 SV=1	68.3453	21	45	1	417	44.725	5.88	132.8	103.9	98	87	92.1	86.2
A0A081IHS4	AGG09_25900	Superoxide dismutase [Cu-Zn] OS=Klebsiella pneumoniae GN=AGG09_25900 PE=3 SV=1	64.7399	7	46	4	173	17.654	6.93	111.6	112.7	113.7	85.5	93.6	82.9
A0A1Y0Q2Z1	B5K12_24925	Low-specificity L-threonine aldolase OS=Klebsiella pneumoniae subsp. pneumoniae GN=B5K12_24925 PE=4 SV=1	89.1892	20	41	2	333	36.243	6.62	97.1	96.8	103.7	93.2	102.1	107
C8T794	HMPREF0484_3486	UPF0304 protein HMPREF0484_3486 OS=Klebsiella pneumoniae subsp. rhinoscleromatis ATCC 13884 GN=HMPREF0484_3486 PE=3 SV=1	83.8542	15	60	7	192	22.746	7.23	95.2	97.1	96.1	101.7	104.4	105.4
A0A230F9N6	CKJ89_07055	Ubiquinol oxidase subunit 2 OS=Klebsiella pneumoniae GN=CKJ89_07055 PE=3 SV=1	36.9427	10	73	10	314	34.798	7.08	98.6	103	102.2	101.6	95.6	99
A0A060VG56	moeA	MoeA protein OS=Klebsiella pneumoniae GN=moeA PE=4 SV=1	45.9854	10	21	2	411	43.954	5.57	103.2	95.1	94	99.8	96.4	111.5
A0A170YZ79	BU230_39360	Protein of uncharacterised function (DUF1451) OS=Klebsiella pneumoniae GN=BU230_39360 PE=4 SV=1	82.6087	13	59	13	161	18.735	5.43	100.3	98.7	98.6	101.3	104.3	96.8
A0A170IPX2	ribE	Riboflavin synthase eubacterial/eukaryotic OS=Klebsiella pneumoniae GN=ribE PE=4 SV=1	80.0948	11	35	1	211	23.054	5.6	94.8	105.8	102.5	95.3	108.4	93.1
J2DI61	UUU_29580	Naphthoate synthase OS=Klebsiella pneumoniae subsp. pneumoniae DSM 30104 GN=UUU_29580 PE=4 SV=1	79.5031	7	28	1	161	17.775	7.18
A0A0H3GP23	KPHS_29170	Uncharacterized protein OS=Klebsiella pneumoniae subsp. pneumoniae (strain HS11286) GN=KPHS_29170 PE=4 SV=1	73.4234	10	49	0	222	24.265	8.47
A0A0V9IF82	yejK	Nucleoid-associated protein AGG09_22350 OS=Klebsiella pneumoniae GN=yejK PE=3 SV=1	60.597	15	36	12	335	37.859	4.86	99.5	101.5	100.6	97.9	101.6	99
A0A231WQV5	B1727_19335	Long-chain-fatty-acid--CoA ligase OS=Klebsiella pneumoniae GN=B1727_19335 PE=4 SV=1	41.1765	15	50	2	561	62.346	6.93	116.8	131.6	131.2	78.9	73.6	68
A0A2D3D1M0	KPH11_24100	Sulfite reductase subunit beta OS=Klebsiella pneumoniae subsp. pneumoniae GN=KPH11_24100 PE=4 SV=1	57.7193	27	43	27	570	63.995	8.19	101.6	101.4	101.7	97.7	100.7	96.9
A0A081M0N3	arnA	Bifunctional polymyxin resistance protein ArnA OS=Klebsiella pneumoniae GN=arnA PE=3 SV=1	50.6808	25	47	25	661	74.014	6.33	100.7	99.3	98.6	99.4	103.7	98.3
A0A0H3GRH3	fabH	3-oxoacyl-[acyl-carrier-protein] synthase 3 OS=Klebsiella pneumoniae subsp. pneumoniae (strain HS11286) GN=fabH PE=3 SV=1	58.3596	13	43	3	317	33.401	5.08	108.1	108.3	107.8	92.1	93.7	90
A6TJ41	cmlA2	Chloramphenicol acetyltransferase OS=Klebsiella pneumoniae subsp. pneumoniae (strain ATCC 700721 / MGH 78578) GN=cmlA2 PE=3 SV=1	70.3196	9	48	9	219	25.659	6.51	45.9	40.2	41.6	159	155.8	157.5
A0A1S0WA40	glmU	Bifunctional protein GlmU OS=Klebsiella pneumoniae GN=glmU PE=3 SV=1	50.8772	15	49	1	456	49.103	6.38	103.8	96.6	91.6	96	106.6	105.5
A0A2G3RSZ4	CS332_18275	1,4-dihydroxy-2-naphthoyl-CoA synthase OS=Klebsiella pneumoniae subsp. pneumoniae GN=CS332_18275 PE=4 SV=1	52.6316	11	36	1	285	31.646	6.4	100.7	113.8	128.6	81.9	94.9	80.1
A0A2D2EZH0	astE	Succinylglutamate desuccinylase OS=Klebsiella pneumoniae GN=astE PE=4 SV=1	69.7819	17	41	1	321	36.523	7.31	155.5	139.3	137.7	51.6	62.3	53.6
A0A2G3RVE4	CS332_14250	GalU regulator GalF OS=Klebsiella pneumoniae subsp. pneumoniae GN=CS332_14250 PE=4 SV=1	50.8418	10	66	3	297	32.723	5.76	99.1	101.6	104.9	94.7	109.6	90.1
A0A060VID4	paaY	PaaY protein OS=Klebsiella pneumoniae GN=paaY PE=4 SV=1	88.3838	12	76	10	198	21.193	6.42	102.7	97	95.7	101	102.5	101.1
A0A0H3GY71	KPHS_47840	Protease TldD OS=Klebsiella pneumoniae subsp. pneumoniae (strain HS11286) GN=KPHS_47840 PE=4 SV=1	57.3805	23	54	23	481	51.218	5.19	94.2	93.9	94.1	103.9	107.7	106.2
A0A0J5AU30	paaB	1,2-epoxyphenylacetyl-CoA isomerase OS=Klebsiella pneumoniae GN=paaB PE=4 SV=1	61.0687	15	64	15	262	28.076	6.35	105.9	107	107.2	94.5	92.5	92.9
A0A1W1KF07	glmU_2	Bifunctional protein GlmU OS=Klebsiella pneumoniae GN=glmU_2 PE=3 SV=1	50.8772	15	46	1	456	49.157	6.48	97.3	96.3	100.1	106.4	107.5	92.5
C8T1I6	nagA	N-acetylglucosamine-6-phosphate deacetylase OS=Klebsiella pneumoniae subsp. rhinoscleromatis ATCC 13884 GN=nagA PE=3 SV=1	64.3979	16	40	1	382	41.27	5.81	99.4	94.2	98.4	95.7	117.3	95
A0A060VFL3	nagA	NagA protein OS=Klebsiella pneumoniae GN=nagA PE=3 SV=1	64.3979	16	40	1	382	41.29	5.57	98.9	106.3	104.6	98.9	96.9	94.4
A0A0J5A2N1	SM87_05303	Fructuronate reductase OS=Klebsiella pneumoniae GN=SM87_05303 PE=3 SV=1	48.9754	19	50	2	488	53.676	5.83	95.4	97	87.7	112.2	105.4	102.3
R4Y4D1	rpoZ	DNA-directed RNA polymerase subunit omega OS=Klebsiella pneumoniae subsp. rhinoscleromatis SB3432 GN=rpoZ PE=3 SV=1	92.3077	10	51	10	91	10.23	4.92	96.1	96.8	95.3	103.8	106.3	101.8
A0A0E1CNG5	KPNJ1_04337	Protein translocase subunit YajC OS=Klebsiella pneumoniae 30660/NJST258_1 GN=KPNJ1_04337 PE=4 SV=1	42.5	7	61	7	120	12.971	9.41	98.8	97.6	98.5	99.6	102.1	103.3
W1DU16		21 kDa hemolysin OS=Klebsiella pneumoniae IS43 PE=4 SV=1	62.3037	11	38	11	191	20.054	9.31	96.2	100	100	103.7	98.4	101.6
A0A0E1CE30	KPNJ1_02736	NADH-dependent flavin oxidoreductase OS=Klebsiella pneumoniae 30660/NJST258_1 GN=KPNJ1_02736 PE=4 SV=1	76.5027	20	61	4	366	39.555	6.42	90	93.9	104.7	100	112.6	98.8
A0A2A5IDE1	rapZ	RNase adapter protein RapZ OS=Klebsiella pneumoniae subsp. pneumoniae GN=rapZ PE=3 SV=1	68.6207	16	39	16	290	33.298	7.02	104	104.3	102	98.9	94.3	96.6
A0A2G3RVU8	deoA	Thymidine phosphorylase OS=Klebsiella pneumoniae subsp. pneumoniae GN=deoA PE=4 SV=1	40.4545	16	46	1	440	46.958	5.17
A0A2G3RWK2	CS332_10895	Phenylalanine--tRNA ligase subunit beta OS=Klebsiella pneumoniae subsp. pneumoniae GN=CS332_10895 PE=4 SV=1	35.0943	25	55	1	795	87.059	5.27	110.2	106.6	105.4	96	91.6	90.1
A6TAI3	pheS	Phenylalanine--tRNA ligase alpha subunit OS=Klebsiella pneumoniae subsp. pneumoniae (strain ATCC 700721 / MGH 78578) GN=pheS PE=3 SV=1	79.2049	22	52	22	327	36.776	5.78	97.3	98.1	97.4	102.5	102.8	101.9
A0A0E1C7F0	KPNJ1_00359	Transcriptional regulatory protein ompR OS=Klebsiella pneumoniae 30660/NJST258_1 GN=KPNJ1_00359 PE=4 SV=1	76.4706	19	63	19	255	29.186	6.4	98.4	95.6	95.6	103.5	101.8	105.1
A0A2G4PV49	CS372_16450	Acyl carrier protein OS=Klebsiella pneumoniae GN=CS372_16450 PE=4 SV=1	42.3077	4	47	1	78	8.635	4.03	95.7	93.4	93.4	102.7	114.4	100.3
W1APU0		Glycerol kinase OS=Klebsiella pneumoniae IS22 PE=3 SV=1	33.1878	11	35	1	458	51.022	6.33	102.5	87.7	86.4	102.4	112.8	108.2
W1BIQ6		Uncharacterized PLP-dependent aminotransferase YfdZ OS=Klebsiella pneumoniae IS22 PE=4 SV=1	63.3663	20	47	1	404	45.092	7.52	98.9	102.6	103.7	96.6	95.5	102.8
A0A1Y0PWN9	B5K12_08275	Alanine transaminase OS=Klebsiella pneumoniae subsp. pneumoniae GN=B5K12_08275 PE=4 SV=1	63.3663	20	48	0	404	45.091	7.8
A6TEL1	yrbC	Putative transport protein (ABC superfamily, atp_bind and membrane) OS=Klebsiella pneumoniae subsp. pneumoniae (strain ATCC 700721 / MGH 78578) GN=yrbC PE=4 SV=1	66.3507	12	48	12	211	23.939	9.45	97.7	99.4	98.6	102.1	100.8	101.4
A0A1U9YFZ2	blaCTX-M-Gp1	Beta-lactamase (Fragment) OS=Klebsiella pneumoniae GN=blaCTX-M-Gp1 PE=3 SV=1	77.193	15	53	1	228	24.203	8.97	56.5	44.8	47.6	153.3	148.2	149.7
A0A181W4L9	yicC	Protein YicC OS=Klebsiella pneumoniae GN=yicC PE=4 SV=1	67.9443	21	54	7	287	33.035	5.12	98.3	102.1	104.8	100.7	96.4	97.7
A0A0S4G2Q5	ftnA_2	Ferritin OS=Klebsiella pneumoniae GN=ftnA_2 PE=3 SV=1	71.5152	10	46	10	165	19.195	4.89	74.4	72	72.3	131	125.3	124.9
Q48452		Putative tyrosine-protein kinase in cps region OS=Klebsiella pneumoniae PE=1 SV=1	49.3075	29	46	20	722	80.351	7.9	144.3	144.9	143.2	51.5	59.4	56.6
A0A2G3RRP6	CS332_19870	Universal stress protein UspE OS=Klebsiella pneumoniae subsp. pneumoniae GN=CS332_19870 PE=4 SV=1	33.8608	8	44	1	316	35.716	5.34	83.8	83.5	82.8	112	124.9	113
A0A2D2PV41	CR231_24160	Protoheme IX biogenesis protein HemY OS=Klebsiella pneumoniae GN=CR231_24160 PE=4 SV=1	56.0302	20	55	3	398	45.011	8.32	98.8	105.1	107.6	98.3	97.7	92.4
A0A1B2ZU00	BCB67_11810	Aminotransferase OS=Klebsiella pneumoniae GN=BCB67_11810 PE=3 SV=1	68.5139	19	40	4	397	43.232	6.06	83.6	91.9	89.4	98.2	127.9	109
A0A081LWM0	glmS_1	Glucosamine--fructose-6-phosphate aminotransferase OS=Klebsiella pneumoniae GN=glmS_1 PE=4 SV=1	54.6742	14	38	1	353	39.062	6.24	87.6	84.4	82.1	116.1	101.2	128.6
W1GBW9		Glucosamine--fructose-6-phosphate aminotransferase [isomerizing] OS=Klebsiella pneumoniae ISC21 PE=4 SV=1	54.6742	14	38	1	353	39.109	6.14	72.5	83.2	74.7	122.8	123.8	122.9
A0A060VK67	gltB	GltB protein OS=Klebsiella pneumoniae GN=gltB PE=4 SV=1	36.9448	39	54	7	1486	163.242	6.47	99.3	98.1	100.9	98.8	104.9	98
A0A1Y0Q716	rplK	50S ribosomal protein L11 OS=Klebsiella pneumoniae subsp. pneumoniae GN=rplK PE=3 SV=1	69.7183	8	43	8	142	14.866	9.63	92.7	91.5	93	106.4	98.6	117.8
W1BBU4		Site-determining protein OS=Klebsiella pneumoniae IS22 PE=3 SV=1	55.5556	16	57	1	270	29.596	5.38	98.3	99.8	89.8	102.2	107.8	102.1
A0A2G8AJ15	C630_17630	Xaa-Pro aminopeptidase OS=Klebsiella pneumoniae subsp. pneumoniae KpO3210 GN=C630_17630 PE=4 SV=1	63.4703	23	60	23	438	49.274	5.15	106.7	102.2	100.8	94.7	96.7	98.9
A0A2G9LDF7	CKQ90_19230	50S ribosomal protein L27 OS=Klebsiella pneumoniae GN=CKQ90_19230 PE=4 SV=1	39.5604	3	43	3	91	9.683	11.05	105.6	99.8	98.8	98.2	100.5	97
A0A2D3CZ30	KPH11_17705	Bifunctional demethylmenaquinone methyltransferase/2-methoxy-6-polyprenyl-1,4-benzoquinol methylase OS=Klebsiella pneumoniae subsp. pneumoniae GN=KPH11_17705 PE=4 SV=1	64.5418	14	49	14	251	28.129	7.18	99.5	101.1	100.6	101.5	99.8	97.7
A0A098CBW0	AGG09_26065	S-(hydroxymethyl)glutathione dehydrogenase OS=Klebsiella pneumoniae GN=AGG09_26065 PE=3 SV=1	44.086	14	51	13	372	39.268	6.32	110.6	111.5	112.1	89.2	86.1	90.5
A0A0E1CEL9	KPNJ1_02735	Uncharacterized protein OS=Klebsiella pneumoniae 30660/NJST258_1 GN=KPNJ1_02735 PE=4 SV=1	60	18	76	18	180	19.3	6.77	94.1	95.3	95.5	106.2	100.8	108.1
A0A060VLI3	KpST82_2947	Uncharacterized protein OS=Klebsiella pneumoniae GN=KpST82_2947 PE=4 SV=1	59.6567	16	52	10	233	26.8	5.49	110.6	109.4	107.9	90.4	93.2	88.5
W1APS1		Superoxide dismutase OS=Klebsiella pneumoniae IS22 PE=3 SV=1	58.2524	10	86	0	206	23.065	6.96
A0A1W2I3V4	fabG_11	Dehydrogenase OS=Klebsiella pneumoniae GN=fabG_11 PE=3 SV=1	80.303	16	45	1	264	27.376	5.44	127.8	77.7	79.3	106	105	104.2
A0A060VEL3	metK	S-adenosylmethionine synthase OS=Klebsiella pneumoniae GN=metK PE=3 SV=1	63.5417	18	48	16	384	41.939	5.2	80.3	82.8	82.6	120.4	115.1	118.9
W1H0Y6		Beta-lactamase OS=Klebsiella pneumoniae ISC21 PE=3 SV=1	58.4192	16	55	3	291	31.226	9.23	29.1	28.1	28	178.3	158.5	178
A0A181NE18	astB_1	N-succinylarginine dihydrolase OS=Klebsiella pneumoniae GN=astB_1 PE=3 SV=1	54.4218	15	38	2	441	48.382	6.42	92.6	89.2	88.4	109.5	112.4	107.9
A0A0J4XUT3	mukF	Chromosome partition protein MukF OS=Klebsiella pneumoniae GN=mukF PE=3 SV=1	64.7727	22	39	22	440	50.243	4.89	94.6	95.6	95.3	104.2	105.6	104.7
V0BAB9	HMPREF1619_00511	Transcriptional regulator KdgR OS=Klebsiella pneumoniae 909957 GN=HMPREF1619_00511 PE=4 SV=1	64.6388	20	58	20	263	29.959	5.34	101.2	100.5	99.9	100	101.7	96.6
A0A0H3H3W4	rplP	50S ribosomal protein L16 OS=Klebsiella pneumoniae subsp. pneumoniae (strain HS11286) GN=rplP PE=3 SV=1	51.4706	6	41	6	136	15.24	11.05	93.5	92.6	93.5	107.7	99.2	113.5
A0A169U426	cysS_2	Cysteine--tRNA ligase OS=Klebsiella pneumoniae GN=cysS_2 PE=3 SV=1	60.0868	24	58	2	461	52.121	5.49	86.1	103.4	79.1	109.2	114	108.2
J2X0L8	UUU_44160	Thioredoxin OS=Klebsiella pneumoniae subsp. pneumoniae DSM 30104 GN=UUU_44160 PE=4 SV=1	62.5	6	39	1	72	7.677	6.64	95	98.8	101.8	97	111.5	95.9
A0A1Y0PWY9	AN663_14820	Carbonic anhydrase OS=Klebsiella pneumoniae subsp. pneumoniae GN=AN663_14820 PE=3 SV=1	69.6682	13	58	2	211	23.23	6.02	109.8	117.6	118.3	87.1	85.3	81.9
A0A2G3RSD0	aspS	Aspartate--tRNA ligase OS=Klebsiella pneumoniae subsp. pneumoniae GN=aspS PE=4 SV=1	36.4407	25	66	1	590	65.721	5.48	85.9	80.5	83.9	123.6	119.8	106.3
W1DRN5	zapB	Cell division protein ZapB OS=Klebsiella pneumoniae IS43 GN=zapB PE=3 SV=1	88.8889	11	56	1	81	9.551	4.56	95.7	90.4	90.2	123.3	103.6	96.7
R4Y565	ppiA	Peptidyl-prolyl cis-trans isomerase OS=Klebsiella pneumoniae subsp. rhinoscleromatis SB3432 GN=ppiA PE=3 SV=1	78.3069	9	67	8	189	20.362	8.91	98.9	102.6	101.2	100.4	99.6	97.3
A0A2G4YEM6	CQB04_11920	Inorganic triphosphatase OS=Klebsiella pneumoniae GN=CQB04_11920 PE=4 SV=1	71.7593	23	58	1	432	48.295	6.19	103.6	95.1	88.1	101.8	119.6	91.7
A0A1Y0Q568	zapB	Cell division protein ZapB OS=Klebsiella pneumoniae subsp. pneumoniae GN=zapB PE=3 SV=1	88.6076	11	55	1	79	9.319	4.56	100.3	103.9	102.5	105	91.7	96.6
A0A0E1CL72	hfq	RNA-binding protein Hfq OS=Klebsiella pneumoniae 30660/NJST258_1 GN=hfq PE=3 SV=1	99.0196	9	135	9	102	10.996	7.65	104	107.4	108.1	94	94.5	91.9
A0A060VJD1	nqrA	Na(+)-translocating NADH-quinone reductase subunit A OS=Klebsiella pneumoniae GN=nqrA PE=3 SV=1	80.0439	24	47	24	456	49.453	7.53	104.2	102	101	98.5	94.9	99.6
A0A060VEN5	B1727_02610	Chaperonin GroEL OS=Klebsiella pneumoniae GN=B1727_02610 PE=4 SV=1	49.0566	14	39	14	318	35.263	5.19	98.9	100.1	101	100.9	101.5	97.6
A0A2D2PK58	CR231_05530	Formimidoylglutamase OS=Klebsiella pneumoniae GN=CR231_05530 PE=4 SV=1	70.4403	17	35	1	318	34.533	5.68	63.1	74.2	76.5	126.3	129.6	130.4
J2XD49	UUU_00480	Aminotransferase OS=Klebsiella pneumoniae subsp. pneumoniae DSM 30104 GN=UUU_00480 PE=3 SV=1	67.0487	17	38	2	349	37.836	6.87	96.2	96	90.2	103.7	111.1	102.9
A0A2G8M4D9	CSQ78_06365	D-cysteine desulfhydrase OS=Klebsiella pneumoniae GN=CSQ78_06365 PE=4 SV=1	61.8902	15	42	1	328	34.938	5.03	66.6	71.9	73.1	132.2	125.6	130.7
J2DH39	ftsY	Signal recognition particle receptor FtsY OS=Klebsiella pneumoniae subsp. pneumoniae DSM 30104 GN=ftsY PE=3 SV=1	56.4797	22	50	11	517	56.106	4.54	102.1	96.9	97.8	105.6	102.8	94.8
A0A1S8YDP8	dapA	4-hydroxy-tetrahydrodipicolinate synthase OS=Klebsiella pneumoniae GN=dapA PE=3 SV=1	56.8493	12	57	12	292	31.141	6.28	100	98.9	97.9	101	100.4	101.7
W1BDY0		Dipeptide-binding ABC transporter, periplasmic substrate-binding component (TC 3.A.1.5.2) OS=Klebsiella pneumoniae IS22 PE=4 SV=1	27.4766	13	72	2	535	60.255	6.65	92.7	98.2	89.9	108.1	99.4	111.7
A0A1W1JCX3	mdh_1	Putative iron-containing alcohol dehydrogenase OS=Klebsiella pneumoniae GN=mdh_1 PE=4 SV=1	56.927	12	26	1	397	41.934	5.17	89	84.4	95.7	133.2	102	95.8
A0A060VIR2	yggL	YggL protein OS=Klebsiella pneumoniae GN=yggL PE=4 SV=1	72.0339	6	45	6	118	13.909	4.88	101.1	102.7	103.3	99.2	99.8	93.9
A0A1Y0Q3N3	AN663_00185	Succinate dehydrogenase iron-sulfur subunit OS=Klebsiella pneumoniae subsp. pneumoniae GN=AN663_00185 PE=3 SV=1	72.541	13	57	13	244	27.219	7.3	98.5	98.6	97.9	102.3	100	102.7
W8V737	ilvD	Dihydroxy-acid dehydratase OS=Klebsiella pneumoniae 30684/NJST258_2 GN=ilvD PE=3 SV=1	53.6278	23	50	23	634	67.595	6.18	106.7	96.6	97.6	100.8	98.8	99.5
A0A098CBZ7	AGG09_15940	RNA-binding transcriptional accessory protein OS=Klebsiella pneumoniae GN=AGG09_15940 PE=4 SV=1	54.5103	31	60	31	776	85.054	6.4	96.2	94.1	95	103.3	106.1	105.2
A0A2G3S108	CS332_04190	Multidrug efflux RND transporter permease subunit OS=Klebsiella pneumoniae subsp. pneumoniae GN=CS332_04190 PE=4 SV=1	15.8246	11	39	1	1049	113.316	5.66	100.1	108.9	102.5	92.8	100.3	95.3
A0A181W1C3	prfC	Peptide chain release factor 3 OS=Klebsiella pneumoniae GN=prfC PE=3 SV=1	53.3081	19	44	19	529	59.604	5.9	102.1	103.6	103.1	96.3	98.3	96.6
A0A1W1K9N1	cynT	Carbonic anhydrase OS=Klebsiella pneumoniae GN=cynT PE=3 SV=1	69.6682	13	55	2	211	23.221	5.81	106.3	113.1	115.2	91.3	87.3	86.9
B5XNZ1	nrdB	Ribonucleoside-diphosphate reductase, beta subunit OS=Klebsiella pneumoniae (strain 342) GN=nrdB PE=4 SV=1	60.6383	17	58	17	376	43.48	4.91	99.1	94.4	94.1	106.6	103.7	102.2
W9BAI2	gpsA	Glycerol-3-phosphate dehydrogenase [NAD(P)+] OS=Klebsiella pneumoniae GN=gpsA PE=3 SV=1	70.5015	15	43	2	339	36.223	7.21	102.6	98.4	95.7	105.3	101	97.1
A0A0J4Y424	mpl	UDP-N-acetylmuramate--L-alanyl-gamma-D-glutamyl-meso-2,6-diaminoheptandioate ligase OS=Klebsiella pneumoniae GN=mpl PE=3 SV=1	46.8271	14	37	14	457	49.787	6.15	100.6	101	101.9	98.5	102.2	95.9
A0A0H3GIT7	rsmC	Ribosomal RNA small subunit methyltransferase C OS=Klebsiella pneumoniae subsp. pneumoniae (strain HS11286) GN=rsmC PE=3 SV=1	63.4503	13	27	13	342	37.337	6.24	95.8	99.6	98.9	101.3	99	105.3
A0A1W1K2H2	fumC	Fumarate hydratase class II OS=Klebsiella pneumoniae GN=fumC PE=3 SV=1	51.2876	17	52	1	466	49.806	6.48	81.2	100.6	112.4	93.2	119.1	93.4
A0A168W7I7	fhuA_3	Ferrichrome outer membrane transporter OS=Klebsiella pneumoniae GN=fhuA_3 PE=3 SV=1	56.0544	28	48	28	735	81.329	6.21	107.3	108.7	108.1	90.5	94.2	91.1
A2V7Y7	gmd	GDP-mannose 4,6-dehydratase OS=Klebsiella pneumoniae GN=gmd PE=3 SV=1	66.129	19	48	2	372	42.039	6.05	146.7	140.1	137.6	55.6	63.6	56.5
A0A2G3RRR9	zwf	Glucose-6-phosphate dehydrogenase OS=Klebsiella pneumoniae subsp. pneumoniae GN=zwf PE=4 SV=1	38.9002	21	58	1	491	55.798	5.76	112.4	104.7	105.4	93.1	92.2	92.2
A0A0E1CDC5	KPNJ1_02476	Glutaredoxin OS=Klebsiella pneumoniae 30660/NJST258_1 GN=KPNJ1_02476 PE=3 SV=1	53.913	6	39	6	115	12.894	5.01	104.6	104.8	105.8	94.4	98.6	91.8
A0A0J4VXK3	hisF	Imidazole glycerol phosphate synthase subunit HisF OS=Klebsiella pneumoniae GN=hisF PE=3 SV=1	70.5426	13	30	13	258	28.26	5.17	108.7	106.7	107.3	92.5	97.1	87.7
A0A0P8M2Q3	arr-3	Rifampin ADP-ribosylating transferase OS=Klebsiella pneumoniae subsp. pneumoniae GN=arr-3 PE=4 SV=1	70	11	48	11	150	16.958	5.33	36.3	35	35.9	170.9	157.8	164
R4YD56	pssA	PssA protein OS=Klebsiella pneumoniae subsp. rhinoscleromatis SB3432 GN=pssA PE=4 SV=1	57.0796	20	52	5	452	52.873	9.19	101.8	103.3	104.3	95.1	99.9	95.6
W1AUX4		Propanediol utilization polyhedral body protein PduJ OS=Klebsiella pneumoniae IS22 PE=4 SV=1	97.8022	7	28	6	91	9.102	6.52	121.9	128	126.1	76.6	75.5	71.7
A0A2A2SUC7	gudD	Glucarate dehydratase OS=Klebsiella pneumoniae GN=gudD PE=3 SV=1	54.7085	15	32	4	446	48.966	6.18	82.6	87.8	89.4	129.4	105.4	105.3
A0A1Y0PWQ1	B5K12_12905	Oxidoreductase OS=Klebsiella pneumoniae subsp. pneumoniae GN=B5K12_12905 PE=4 SV=1	69.863	13	36	2	292	31.363	6.21	94.3	89.8	95.9	88	137.3	94.7
W8VIE9	hemC	Porphobilinogen deaminase OS=Klebsiella pneumoniae 30684/NJST258_2 GN=hemC PE=3 SV=1	67.6101	17	46	17	318	34.299	5.83	101.6	101	102.8	96.8	100.3	97.4
A0A060VK64	KpST82_0604	Aerobic respiration control sensor protein OS=Klebsiella pneumoniae GN=KpST82_0604 PE=4 SV=1	49.0494	28	47	16	789	88.745	5.11	107	108.4	109.6	90.7	92.1	92.1
A0A060VL31	KpST82_1579	Uncharacterized protein OS=Klebsiella pneumoniae GN=KpST82_1579 PE=4 SV=1	54.4928	11	42	10	345	37.453	7.56	98.9	103.3	103.1	98.5	97.6	98.7
A0A2G4Q2J3	CS372_03695	Glycerol-3-phosphate dehydrogenase (NAD(P)(+)) OS=Klebsiella pneumoniae GN=CS372_03695 PE=4 SV=1	75.2212	16	46	3	339	36.209	7.21	95.7	96.4	91.9	106.1	106.7	103.2
A0A2G3S0L4	glmS	Glutamine--fructose-6-phosphate transaminase (Isomerizing) OS=Klebsiella pneumoniae subsp. pneumoniae GN=glmS PE=4 SV=1	20.3612	11	38	1	609	66.811	5.94	113.6	111	105.8	82.3	96.1	91.2
A0A060VJN5	glnE	Bifunctional glutamine synthetase adenylyltransferase/adenylyl-removing enzyme OS=Klebsiella pneumoniae GN=glnE PE=3 SV=1	36.7196	23	36	23	945	107.457	5.43	95.4	92.8	91.2	103.9	111.5	105.1
R4YD53	rnk	Regulator of nucleoside diphosphate kinase OS=Klebsiella pneumoniae subsp. rhinoscleromatis SB3432 GN=rnk PE=3 SV=1	94.8529	7	25	7	136	14.859	4.87	99.4	98.1	96.8	101.7	104	100.1
A0A0S3FEC3	AGG09_17830	Uncharacterized protein OS=Klebsiella pneumoniae GN=AGG09_17830 PE=4 SV=1	69.171	21	41	1	386	44.512	4.83	94	89.3	91.9	110.4	109.6	104.8
A0A230TIE0	metQ	Lipoprotein OS=Klebsiella pneumoniae GN=metQ PE=3 SV=1	54.4776	11	35	11	268	29.281	5.57	90.3	93.2	93.9	109.3	107.6	105.7
A0A170BMP4	hemY	HemY-like protein OS=Klebsiella pneumoniae GN=hemY PE=4 SV=1	55.0251	19	49	2	398	44.992	8.98	88.5	85.6	83.8	110.1	115.9	116
W1GPB1		Dihydrolipoamide succinyltransferase component (E2) of 2-oxoglutarate dehydrogenase complex OS=Klebsiella pneumoniae ISC21 PE=4 SV=1	86.2245	18	76	1	196	21.711	6.21	90.3	98.4	91.6	102.8	113	103.9
A0A0C7K713	ydgJ_1	Putative oxidoreductase YdgJ OS=Klebsiella pneumoniae GN=ydgJ_1 PE=4 SV=1	59.4086	19	45	18	372	40.792	6.11	104.7	103.2	104.1	97.8	95.5	94.8
W1BD49		Periplasmic serine endoprotease DegP-like OS=Klebsiella pneumoniae IS22 PE=3 SV=1	21.519	8	33	2	474	49.323	8.56	89	95.7	95.7	107.2	105.9	106.5
A0A2D3CCV2	BMF28_07050	Alanine transaminase OS=Klebsiella pneumoniae GN=BMF28_07050 PE=4 SV=1	63.3663	20	47	1	404	45.049	7.8	183.3	162.3	155.2	26.3	45.7	27.3
A0A060VMW5	ltaE	LtaE protein OS=Klebsiella pneumoniae GN=ltaE PE=4 SV=1	82.2823	19	37	1	333	36.229	6.8	104.6	114.3	117.9	90.4	80.1	92.7
A0A1C3Q8J1	gltB	Glutamate synthase subunit alpha OS=Klebsiella pneumoniae GN=gltB PE=4 SV=1	33.7147	36	51	4	1486	163.21	6.47	107	102.5	106.5	85.3	122.9	75.8
W1H5Z5		Exodeoxyribonuclease III OS=Klebsiella pneumoniae ISC21 PE=4 SV=1	80.597	18	59	2	268	30.877	6.13	123.4	111.3	106.7	78.7	99.4	80.5
A0A246QYW1	cmk	Cytidylate kinase OS=Klebsiella pneumoniae subsp. pneumoniae GN=cmk PE=3 SV=1	72.6872	11	33	1	227	24.873	5.39	149.8	160.7	163.5	41.3	47.9	36.8
A0A180HDC4	BCB67_00870	Manganese/iron transporter ATP-binding protein OS=Klebsiella pneumoniae GN=BCB67_00870 PE=4 SV=1	82.0513	14	40	2	273	29.772	8.88	144.6	153.6	151	47	57.1	46.7
A0A060VP16	xthA	XthA protein OS=Klebsiella pneumoniae GN=xthA PE=4 SV=1	68.5714	18	58	2	315	35.955	6.54	105.6	91.6	88.1	98	109.4	107.4
W1BD92		Trehalose 6-phosphate phosphatase OS=Klebsiella pneumoniae IS22 PE=3 SV=1	71.7557	16	41	16	262	28.591	5.05	105.3	99.7	98.9	97.1	102.5	96.5
A0A170A3D2	mdh_2	Putative iron-containing alcohol dehydrogenase OS=Klebsiella pneumoniae GN=mdh_2 PE=4 SV=1	52.8967	11	23	1	397	41.934	5.25	66.5	89.1	117.4	103.2	122	101.8
W8URH5	iscR	HTH-type transcriptional regulator IscR OS=Klebsiella pneumoniae 30684/NJST258_2 GN=iscR PE=3 SV=1	63.8037	7	15	7	163	17.54	7.34	133.3	128.6	126.3	68.9	74.4	68.6
J2X9Z5	astB	N-succinylarginine dihydrolase OS=Klebsiella pneumoniae subsp. pneumoniae DSM 30104 GN=astB PE=3 SV=1	54.4218	15	36	2	441	48.367	6.67	105.9	115.2	112.2	86.9	89.9	90
A0A0H3GTR5	obg	GTPase Obg OS=Klebsiella pneumoniae subsp. pneumoniae (strain HS11286) GN=obg PE=3 SV=1	44.1327	12	32	12	392	43.55	4.89	103.8	99.2	99.4	98.7	100.6	98.2
A0A1B2ZP93	BCB67_18510	Protein acetyltransferase OS=Klebsiella pneumoniae GN=BCB67_18510 PE=4 SV=1	63.9864	36	59	36	883	96.954	6.51	103.9	104.2	104.9	92.2	102.3	92.7
A0A098C842	AGG09_04205	UPF0502 protein AGG09_04205 OS=Klebsiella pneumoniae GN=AGG09_04205 PE=3 SV=1	68.2028	12	40	1	217	24.358	5.17	95.8	101.7	100.3	106.8	102.3	93.2
A0A0H3GLW5	plsB	Glycerol-3-phosphate acyltransferase OS=Klebsiella pneumoniae subsp. pneumoniae (strain HS11286) GN=plsB PE=3 SV=1	49.8141	29	51	14	807	91.264	8.63	102.7	98.6	99.1	98.8	104.3	96.5
A0A1Y0Q6D4	fur	Ferric uptake regulation protein OS=Klebsiella pneumoniae subsp. pneumoniae GN=fur PE=3 SV=1	84.6667	11	57	11	150	17.099	5.96	101.5	101.5	100.7	98	101.8	96.6
A0A2D1J8V2	CR230_26375	Sensor domain-containing diguanylate cyclase OS=Klebsiella pneumoniae GN=CR230_26375 PE=4 SV=1	69.969	17	35	17	323	36.291	5.87	103.7	104	103.2	94.6	98.9	95.7
W8UDS1	KPNJ2_00380	Ribulose-phosphate 3-epimerase OS=Klebsiella pneumoniae 30684/NJST258_2 GN=KPNJ2_00380 PE=3 SV=1	62.9956	9	35	9	227	24.651	5.78	99	97.1	96.1	103.4	101.5	102.9
A0A0H3GSI5	ddl	D-alanine--D-alanine ligase OS=Klebsiella pneumoniae subsp. pneumoniae (strain HS11286) GN=ddl PE=3 SV=1	79.2553	19	52	13	376	40.797	5.26	98.2	100.6	101	100.5	98.2	101.6
A0A1C3Q0V2	benD	1,6-dihydroxycyclohexa-2,4-diene-1-carboxyla te dehydrogenase OS=Klebsiella pneumoniae GN=benD PE=4 SV=1	65.1822	10	19	10	247	25.656	7.91	96.1	97.3	96.4	104.6	103.3	102.2
V0ATF6	garR	2-hydroxy-3-oxopropionate reductase OS=Klebsiella pneumoniae 909957 GN=garR PE=3 SV=1	75.4967	14	35	14	302	31.465	6.15	79.3	78.5	79.8	120.1	119.9	122.5
A0A236W6N9	CI704_03395	FAD-binding oxidoreductase OS=Klebsiella pneumoniae subsp. pneumoniae GN=CI704_03395 PE=4 SV=1	32.7112	23	36	1	1018	112.684	7.39	78.9	80.2	80	112.9	129	119
A0A2G4PVY7	CS372_18215	Galactokinase OS=Klebsiella pneumoniae GN=CS372_18215 PE=4 SV=1	55.2356	14	41	7	382	41.303	5.57	89.4	89.7	90.3	109.5	109.8	111.3
A0A0E1CPC5	murE	UDP-N-acetylmuramoyl-L-alanyl-D-glutamate--2,6-diaminopimelate ligase OS=Klebsiella pneumoniae 30660/NJST258_1 GN=murE PE=3 SV=1	66.6667	21	44	21	495	53.295	6.3	105.2	105.2	106.6	93.5	97.6	92
A0A2G3RQT4	CS332_22730	Xaa-Pro dipeptidase OS=Klebsiella pneumoniae subsp. pneumoniae GN=CS332_22730 PE=4 SV=1	31.377	10	45	1	443	50.187	5.99	50.5	35.2	40	163.8	153	157.3
R4Y7K4	KPR_0307	Uncharacterized protein OS=Klebsiella pneumoniae subsp. rhinoscleromatis SB3432 GN=KPR_0307 PE=4 SV=1	78.6408	11	58	11	103	11.13	7.93	95.1	99.8	99.5	106.1	94.9	104.5
A0A2G3RRA4	CS332_20320	DNA-binding transcriptional regulator H-NS OS=Klebsiella pneumoniae subsp. pneumoniae GN=CS332_20320 PE=4 SV=1	43.7956	6	64	1	137	15.547	5.29	119.2	104.4	98.4	87.4	104.7	85.9
A0A1C1T502	BCB67_04255	ABC transporter substrate-binding protein OS=Klebsiella pneumoniae GN=BCB67_04255 PE=4 SV=1	65.0376	24	57	24	532	59.142	6.64	103.3	105.5	104.2	96.5	96.2	94.4
A0A2G4PVT3	CS372_18075	Formimidoylglutamase OS=Klebsiella pneumoniae GN=CS372_18075 PE=4 SV=1	68.239	16	30	1	318	34.589	5.54
A0A0J5A1N7	SM87_04945	Alanine racemase OS=Klebsiella pneumoniae GN=SM87_04945 PE=3 SV=1	65.7303	18	41	18	356	38.679	7.15	104.4	101.5	101.9	98.4	98.1	95.7
A0A086IUL8	yghU	Disulfide-bond oxidoreductase YghU OS=Klebsiella pneumoniae GN=yghU PE=4 SV=1	50.6944	11	54	1	288	32.33	6.32	93.3	99.7	100.7	106.2	103.1	97
A0A1Y0PV95	lsrK	Autoinducer-2 kinase OS=Klebsiella pneumoniae subsp. pneumoniae GN=lsrK PE=3 SV=1	49.6241	16	32	16	532	57.655	5.52	105.6	98.2	96.2	96	105.9	98.2
A0A1B2ZI15	BCB67_03365	Pectinesterase OS=Klebsiella pneumoniae GN=BCB67_03365 PE=4 SV=1	44.7307	15	47	15	427	45.545	7.34	95.3	95.3	93.8	104.3	107.7	103.7
A0A1W1JZ31	gsiA_6	Oligopeptide transport ATP-binding protein OppF OS=Klebsiella pneumoniae GN=gsiA_6 PE=3 SV=1	64.9701	18	46	18	334	37.201	7.47	99.3	98.2	98.9	100	102.3	101.3
A0A0E1CBB7	KPNJ1_00288	DcrB protein OS=Klebsiella pneumoniae 30660/NJST258_1 GN=KPNJ1_00288 PE=4 SV=1	77.0053	10	58	10	187	19.731	5.3	98.3	100.6	102	100.6	94.7	103.8
A0A0J4XWM8	lhgO	L-2-hydroxyglutarate oxidase LhgO OS=Klebsiella pneumoniae GN=lhgO PE=3 SV=1	57.8199	20	44	2	422	45.709	8.75	105.7	102.8	96.5	98.1	73	123.9
A0A2A5ICF4	CI704_24165	NAD(P)H-quinone oxidoreductase OS=Klebsiella pneumoniae subsp. pneumoniae GN=CI704_24165 PE=4 SV=1	58.589	14	47	0	326	34.536	6.23
A0A0H3GN28	dapB	4-hydroxy-tetrahydrodipicolinate reductase OS=Klebsiella pneumoniae subsp. pneumoniae (strain HS11286) GN=dapB PE=3 SV=1	69.5971	14	31	14	273	28.63	6.18	98.9	97.2	96.5	101.6	103.8	102.1
A0A2G8ABD3	C630_24490	Sugar ABC transporter substrate-binding protein OS=Klebsiella pneumoniae subsp. pneumoniae KpO3210 GN=C630_24490 PE=4 SV=1	60.6918	19	55	1	318	34.116	8.25	121.9	136.2	135.9	74.1	63	68.9
A0A1E3F955	BCB67_18745	Uncharacterized protein OS=Klebsiella pneumoniae GN=BCB67_18745 PE=4 SV=1	86.7021	10	48	7	188	20.381	5.35	82.1	83.5	82.1	113.2	120.9	118.2
A0A2D2EHA4	CTI52_12710	NADH:flavin oxidoreductase/NADH oxidase OS=Klebsiella pneumoniae GN=CTI52_12710 PE=4 SV=1	56.2842	17	54	2	366	39.587	6.64	107.4	110.8	107.6	85.2	101.9	87
A0A2A2BHR5	ilvE	Branched-chain-amino-acid aminotransferase OS=Klebsiella pneumoniae GN=ilvE PE=3 SV=1	62.7832	14	35	3	309	33.89	6.18	84.7	94.1	93.8	113	100.7	113.7
A0A2D2EY92	CTI52_13765	Carboxypeptidase M32 OS=Klebsiella pneumoniae GN=CTI52_13765 PE=4 SV=1	55.3535	20	39	2	495	56.376	5.49	99.4	105.2	109.4	96.9	96.5	92.6
A0A1W1QYX8	SAMEA4362626_01872	AsmA protein OS=Klebsiella pneumoniae GN=SAMEA4362626_01872 PE=4 SV=1	31.8699	13	30	2	615	68.439	5.73	95.8	91.2	94.4	97.5	117.5	103.5
A0A2D3CYE2	KPH11_16470	Phosphatidylserine decarboxylase OS=Klebsiella pneumoniae subsp. pneumoniae GN=KPH11_16470 PE=4 SV=1	66.875	15	54	4	320	35.471	6.71	97.4	104.5	104.8	97.3	100.1	95.9
A0A0C7KEC2	paaF	2,3-dehydroadipyl-CoA hydratase OS=Klebsiella pneumoniae GN=paaF PE=3 SV=1	65.4902	13	39	1	255	27.408	7.42	125.5	127.3	123.4	70.8	76.3	76.7
J2X3U4	glgX	Glycogen debranching enzyme OS=Klebsiella pneumoniae subsp. pneumoniae DSM 30104 GN=glgX PE=3 SV=1	52.1277	24	43	2	658	73.603	6.1	96.9	89.1	95.2	108.6	108.1	102.1
A0A181W7R3	cysQ	3'(2'),5'-bisphosphate nucleotidase CysQ OS=Klebsiella pneumoniae GN=cysQ PE=4 SV=1	66.3968	12	52	1	247	27.293	5.81	112.5	145.3	140.7	65.3	71.1	65.1
A0A060VE50	KpST82_3683	Uncharacterized protein OS=Klebsiella pneumoniae GN=KpST82_3683 PE=4 SV=1	82.0513	14	39	1	273	29.819	8.48	140.4	131.5	132	59.4	75.8	60.8
A0A0J4QGZ3	grpE	Protein GrpE OS=Klebsiella pneumoniae GN=grpE PE=3 SV=1	88.7755	15	61	1	196	21.707	4.77	106.3	107.9	111	98.5	93.8	82.5
W1HS41	atpC	ATP synthase epsilon chain OS=Klebsiella pneumoniae IS39 GN=atpC PE=3 SV=1	76.259	5	64	1	139	15.055	6.28	98.3	100.6	99.7	105.5	97.8	98.2
A0A2D3D272	KPH11_24325	Manganese/iron transporter ATP-binding protein OS=Klebsiella pneumoniae subsp. pneumoniae GN=KPH11_24325 PE=4 SV=1	82.0513	14	37	2	273	29.802	8.85	114.6	111.2	118.9	77.2	99.8	78.3
A0A2A5IHE6	dcyD	D-cysteine desulfhydrase OS=Klebsiella pneumoniae subsp. pneumoniae GN=dcyD PE=3 SV=1	60.061	15	40	1	328	34.95	5.11	85.5	76.4	70	114.5	142.7	110.8
A0A236K171	rplY	50S ribosomal protein L25 OS=Klebsiella pneumoniae subsp. pneumoniae GN=rplY PE=3 SV=1	72.3404	10	62	4	94	10.632	9.31	73.9	75.9	77	131.3	115.2	126.7
A0A0E1CHT6	KPNJ1_02297	Anaerobic glycerol-3-phosphate dehydrogenase membrane anchor subunit OS=Klebsiella pneumoniae 30660/NJST258_1 GN=KPNJ1_02297 PE=4 SV=1	32.6791	23	36	1	1019	112.817	7.39	128.1	130.7	130.7	66.1	77.3	67.1
B5XZ02	ilvE	Branched-chain-amino-acid aminotransferase OS=Klebsiella pneumoniae (strain 342) GN=ilvE PE=3 SV=1	62.7832	13	34	2	309	33.939	6.18	101.7	93	97.3	104.9	106.9	96.2
A0A2G8APA8	C630_07550	Fumarate hydratase OS=Klebsiella pneumoniae subsp. pneumoniae KpO3210 GN=C630_07550 PE=4 SV=1	50	20	60	3	550	60.016	6.16	70.6	63.4	64	138.1	140.6	123.4
A0A1B2ZRM1	glgX	Glycogen debranching enzyme OS=Klebsiella pneumoniae GN=glgX PE=3 SV=1	49.5441	23	42	1	658	73.516	6.16	123.1	114.1	121.6	74.9	82.6	83.8
A0A0E1CAZ0	KPNJ1_01611	Long-chain fatty acid transport protein OS=Klebsiella pneumoniae 30660/NJST258_1 GN=KPNJ1_01611 PE=4 SV=1	43.2127	12	37	12	442	47.823	5.31	128.7	130.5	129.2	67	75.7	68.9
W8UWG5	KPNJ2_01477	Exopolyphosphatase OS=Klebsiella pneumoniae 30684/NJST258_2 GN=KPNJ2_01477 PE=3 SV=1	57.2549	25	58	2	510	57.657	6.81	93.6	93.3	91.6	108.8	110.5	102.2
A0A171A1Q0	B4U21_21265	Exopolyphosphatase OS=Klebsiella pneumoniae GN=B4U21_21265 PE=3 SV=1	57.2549	25	58	2	510	57.63	6.81	147.8	150.7	167.6	45.3	47.1	41.6
A0A2A2NMP3	bamD	Outer membrane protein assembly factor BamD OS=Klebsiella pneumoniae GN=bamD PE=3 SV=1	60.8163	13	41	13	245	27.87	8.02	95.1	93.8	94.2	104.2	107.1	105.6
A0A246RCS7	B5K12_02015	Long-chain-fatty-acid--CoA ligase OS=Klebsiella pneumoniae subsp. pneumoniae GN=B5K12_02015 PE=4 SV=1	42.959	16	47	3	561	62.379	6.7	116.5	121.8	120.5	80.8	81.7	78.6
A0A1W1KDM9	rpoD	RNA polymerase sigma factor RpoD OS=Klebsiella pneumoniae GN=rpoD PE=3 SV=1	45.0245	23	60	22	613	70.339	4.78	98.1	98.8	98.2	102.9	102.4	99.5
W1E0P9	rplQ	50S ribosomal protein L17 OS=Klebsiella pneumoniae IS46 GN=rplQ PE=3 SV=1	42.9688	8	56	8	128	14.437	11.05	99.3	98.7	97.3	101.8	100.4	102.5
A0A1C1RN05	B4U22_26250	Glutathione-like synthetase OS=Klebsiella pneumoniae GN=B4U22_26250 PE=4 SV=1	69.171	21	39	1	386	44.497	4.77	149.6	134.3	143.8	47.3	80.7	44.4
A0A170CE87	hutG	Formimidoylglutamase OS=Klebsiella pneumoniae GN=hutG PE=3 SV=1	62.5786	16	34	1	318	34.613	5.83	114.6	76.2	66.5	113.7	119.5	109.5
B5XRH0	argD	Acetylornithine/succinyldiaminopimelate aminotransferase OS=Klebsiella pneumoniae (strain 342) GN=argD PE=3 SV=1	40.5473	10	28	9	402	42.52	6.76	97.5	98.8	98.4	93.1	117.1	95.2
B5XPW3	dcyD	D-cysteine desulfhydrase OS=Klebsiella pneumoniae (strain 342) GN=dcyD PE=3 SV=1	54.878	13	39	2	328	34.822	5.02	140.7	151.4	152.5	48.2	56.6	50.7
W9BA78	yhdH	Oxidoreductase OS=Klebsiella pneumoniae GN=yhdH PE=4 SV=1	62.7692	14	40	7	325	34.439	5.36	94.8	95.9	95.8	103.3	105.4	104.7
A0A2G4Y803	CQB04_24575	Universal stress protein UspG OS=Klebsiella pneumoniae GN=CQB04_24575 PE=4 SV=1	67.1329	11	38	2	143	15.585	8.47	103	112.6	111.5	92.2	91.2	89.5
A0A1V7SDC9	ygfZ	tRNA-modifying protein YgfZ OS=Klebsiella pneumoniae GN=ygfZ PE=3 SV=1	59.633	13	48	13	327	35.613	5.43	106.2	101.3	100.5	94.7	100.6	96.6
J2EAB1	UUU_02500	Zinc-binding dehydrogenase family oxidoreductase OS=Klebsiella pneumoniae subsp. pneumoniae DSM 30104 GN=UUU_02500 PE=3 SV=1	35.9116	9	38	7	362	38.713	6.32	91.4	99.7	94.1	105	107.6	102.2
Q6JWP9	uge	Uridine diphosphate galacturonate 4-epimerase OS=Klebsiella pneumoniae GN=uge PE=4 SV=1	53.8922	15	50	2	334	37.552	6.13	110.6	113.5	93.3	96.9	87	98.6
A0A210V0A7	def	Peptide deformylase OS=Klebsiella pneumoniae GN=def PE=3 SV=1	72.1893	11	31	2	169	19.343	5.22	115.6	122.3	118.9	87	79.1	77.1
W9B258	def	Peptide deformylase OS=Klebsiella pneumoniae GN=def PE=3 SV=1	72.1893	11	32	2	169	19.343	5.22	99.3	92.2	98.1	101.3	103.6	105.6
J2E191	UUU_39900	Alpha-1,4 glucan phosphorylase OS=Klebsiella pneumoniae subsp. pneumoniae DSM 30104 GN=UUU_39900 PE=3 SV=1	66.7702	16	41	1	322	36.101	6.46	83.9	84.5	88.5	94.4	142.7	106
B5XW62	KPK_2080	DsrE/DsrF family protein OS=Klebsiella pneumoniae (strain 342) GN=KPK_2080 PE=4 SV=1	81.1966	5	37	1	117	12.583	5.11	86.7	114.3	101.6	107.9	83.3	106.2
A0A1W1K840	gsiA_5	Oligopeptide transport ATP-binding protein OppD OS=Klebsiella pneumoniae GN=gsiA_5 PE=3 SV=1	66.7656	14	42	14	337	36.916	7.4	99.7	100.9	102.9	100	100.5	95.9
A0A2A2NM96	grpE	Protein GrpE OS=Klebsiella pneumoniae GN=grpE PE=3 SV=1	88.7755	15	58	2	196	21.753	4.77	148.5	160.8	154.1	38.5	52.3	45.8
A0A1Y0PUL8	AN663_04345	Cytosine deaminase OS=Klebsiella pneumoniae subsp. pneumoniae GN=AN663_04345 PE=4 SV=1	59.5455	17	42	1	440	48.942	5.87	96.9	101.2	95.7	99.4	111.3	95.6
W8UJX9	KPNJ2_03409	Ferric aerobactin receptor OS=Klebsiella pneumoniae 30684/NJST258_2 GN=KPNJ2_03409 PE=3 SV=1	46.4674	25	46	1	736	81.213	5.1	114.4	99.3	91.4	93.1	108.5	93.3
A0A2D2GE08	psd	Phosphatidylserine decarboxylase proenzyme OS=Klebsiella pneumoniae GN=psd PE=4 SV=1	65.625	14	48	1	320	35.502	6.43	121.3	99.4	104.6	76.7	114.2	83.8
A0A060VQ54	KpST82_0439	Uncharacterized protein OS=Klebsiella pneumoniae GN=KpST82_0439 PE=4 SV=1	58.1574	22	55	1	521	58.369	9.11	64.5	58.4	71.9	133.1	140.6	131.5
A0A0C7KGV1	rnb	Exoribonuclease 2 OS=Klebsiella pneumoniae GN=rnb PE=3 SV=1	50.6211	27	46	6	644	72.336	5.62	95.5	94.4	96.5	100.8	112.7	100.2
A0A168NSY9	acr1_2	Dehydrogenase OS=Klebsiella pneumoniae GN=acr1_2 PE=3 SV=1	55.5891	17	45	17	331	35.943	9.8	115.8	113.5	112	82.3	92	84.3
A0A2A2SNX6	BVX91_22285	Iron-sulfur cluster carrier protein OS=Klebsiella pneumoniae GN=BVX91_22285 PE=3 SV=1	61.2466	16	48	16	369	39.816	6.52	95.4	97.3	96.7	106.5	99.3	104.8
W1B5U8		Phenylacetate degradation enoyl-CoA hydratase PaaA OS=Klebsiella pneumoniae IS22 PE=3 SV=1	65.4902	14	41	2	255	27.378	7.91	80.8	79.8	81.8	118.8	119.2	119.6
A0A2D1HL42	AN663_17355	Carboxypeptidase M32 OS=Klebsiella pneumoniae subsp. pneumoniae GN=AN663_17355 PE=4 SV=1	55.3535	19	36	1	495	56.434	5.49	89.1	81.1	83.9	126.4	112	107.6
A0A0E1CQK9	purH	Bifunctional purine biosynthesis protein PurH OS=Klebsiella pneumoniae 30660/NJST258_1 GN=purH PE=3 SV=1	64.684	26	45	2	538	58.253	6	113.4	110.7	110.3	84.1	90.6	91
A0A0C7KIZ7	glnH_1	ABC transporter glutamine-binding protein GlnH OS=Klebsiella pneumoniae GN=glnH_1 PE=3 SV=1	72.4907	16	42	4	269	28.703	8.65	105.5	106.3	106	97	93.7	91.5
W1AZ26	wzzE	ECA polysaccharide chain length modulation protein OS=Klebsiella pneumoniae IS22 GN=wzzE PE=3 SV=1	60.0592	19	45	19	338	38.215	6.42	101.3	99.1	98.9	99.6	102.1	99
W1AUZ9	gmd	GDP-mannose 4,6-dehydratase OS=Klebsiella pneumoniae IS22 GN=gmd PE=3 SV=1	60.2151	18	49	2	372	42.076	6.14	130.6	129.5	131.6	67.5	78.9	61.9
W8VES6	KPNJ2_01246	Osmotically inducible protein Y OS=Klebsiella pneumoniae 30684/NJST258_2 GN=KPNJ2_01246 PE=4 SV=1	51.8182	7	46	7	110	11.886	9.55	104.4	104.3	104.7	97.4	93.4	95.7
W9BF82	ycbX	YcbX protein OS=Klebsiella pneumoniae GN=ycbX PE=4 SV=1	59.0786	16	33	2	369	40.475	6.86	106.9	96.7	93.5	103.3	100.4	99.2
W1DGN7	rplY	50S ribosomal protein L25 OS=Klebsiella pneumoniae IS43 GN=rplY PE=3 SV=1	72.3404	10	54	4	94	10.574	9.52	138.3	147.7	153.1	49.9	55.1	55.9
A0A0J4X107	glk	Glucokinase OS=Klebsiella pneumoniae GN=glk PE=3 SV=1	57.3209	12	42	12	321	34.373	6.38	96.8	97.8	98.1	101.3	104.2	101.8
A0A2G3RU66	CS332_17505	YicC family protein OS=Klebsiella pneumoniae subsp. pneumoniae GN=CS332_17505 PE=4 SV=1	50.1742	16	47	2	287	33.201	5.12	98.2	96.1	96.6	102.5	98.9	107.7
A0A2D2GR47	CTI55_15330	NAD(P)H-quinone oxidoreductase OS=Klebsiella pneumoniae GN=CTI55_15330 PE=4 SV=1	58.589	14	46	1	326	34.562	6.23	104.7	105.5	106.5	92	97	94.2
A0A2G8A851	C630_27475	Copper-translocating P-type ATPase OS=Klebsiella pneumoniae subsp. pneumoniae KpO3210 GN=C630_27475 PE=4 SV=1	34.6389	19	54	19	817	87.133	6.62	114.1	106.8	105.6	88.5	95	90
A0A2G3S347	CS332_00770	Superoxide dismutase [Mn] OS=Klebsiella pneumoniae subsp. pneumoniae GN=CS332_00770 PE=4 SV=1	53.8835	8	78	1	206	22.983	6.96	103	102.1	105.4	110.7	84.7	94.1
A0A0E1CCS6	KPNJ1_02060	Protease II OS=Klebsiella pneumoniae 30660/NJST258_1 GN=KPNJ1_02060 PE=4 SV=1	46.3557	21	38	6	686	78.83	5.47	109.1	112.5	118.7	86.8	88.3	84.6
A0A1B2ZN16	BCB67_09060	NAD-dependent epimerase OS=Klebsiella pneumoniae GN=BCB67_09060 PE=4 SV=1	63.7725	16	45	1	334	37.556	5.81	136.1	149.8	151	57.2	55.2	50.8
A0A0C7KES1	mdoD	Glucans biosynthesis protein D OS=Klebsiella pneumoniae GN=mdoD PE=3 SV=1	50.9772	22	39	22	614	70.265	6.49	104.5	105.9	106.3	90.1	95.4	97.8
W1AQJ4	rplM	50S ribosomal protein L13 OS=Klebsiella pneumoniae IS22 GN=rplM PE=3 SV=1	50	9	73	1	142	16.009	9.91	78.4	87.1	90	108.9	116	119.6
A0A0J4KGA1	CR231_08980	1,2-phenylacetyl-CoA epoxidase subunit B OS=Klebsiella pneumoniae GN=CR231_08980 PE=4 SV=1	80	7	42	2	95	10.941	6.37	88.1	89.5	85.9	108.5	115.4	112.7
W8URT7	miaA	tRNA dimethylallyltransferase OS=Klebsiella pneumoniae 30684/NJST258_2 GN=miaA PE=3 SV=1	64.8734	14	34	14	316	34.823	6	100.9	95.7	95.1	100	108.2	100.1
A0A2D2PTF8	CR231_20950	Methionyl-tRNA formyltransferase OS=Klebsiella pneumoniae GN=CR231_20950 PE=4 SV=1	71.746	15	49	15	315	33.957	6.55	98.6	100.6	101.4	99.2	99.2	101.1
C8T5P9	elbB	Glyoxalase OS=Klebsiella pneumoniae subsp. rhinoscleromatis ATCC 13884 GN=elbB PE=3 SV=1	52.0737	8	32	3	217	22.809	4.87	100.6	98.2	98.3	100.8	99.7	102.4
W1HY59		Putative cytoplasmic protein OS=Klebsiella pneumoniae IS39 PE=4 SV=1	62.8664	15	32	15	307	34.566	4.88	107.7	99.1	97.9	94.6	100.5	100.1
A0A060VGU2	KpST82_1844	Uncharacterized protein OS=Klebsiella pneumoniae GN=KpST82_1844 PE=4 SV=1	46.9169	13	27	13	373	42.593	4.89	86.8	88.8	89.6	111.6	112.5	110.7
W8UG21	fadR	Fatty acid metabolism regulator protein OS=Klebsiella pneumoniae 30684/NJST258_2 GN=fadR PE=3 SV=1	67.803	14	37	14	264	29.735	7.27	90.6	91.4	93.2	104.7	111.1	109.1
Q6U607	iutA	Ferric aerobactin receptor OS=Klebsiella pneumoniae GN=iutA PE=1 SV=1	42.292	25	37	25	733	80.803	5.34	133.5	137.2	134.5	63.6	69.6	61.5
J9U3J6	ompK35	OmpK35 porin (Fragment) OS=Klebsiella pneumoniae GN=ompK35 PE=4 SV=1	32.5779	10	52	1	353	38.488	4.92	126.3	121.2	124	74.4	79.7	74.3
A0A0C7KB90	hutG	Formimidoylglutamase OS=Klebsiella pneumoniae GN=hutG PE=3 SV=1	60.3774	15	28	1	318	34.54	5.66	150.7	140.7	145.3	45.4	57.8	60.1
R4YI77	miaB	tRNA-2-methylthio-N(6)-dimethylallyladenosine synthase OS=Klebsiella pneumoniae subsp. rhinoscleromatis SB3432 GN=miaB PE=3 SV=1	60.3704	24	37	24	540	60.876	5.83	72.4	71.5	72.1	128.7	126	129.3
A0A2G9LG34	CKQ90_07965	Mechanosensitive ion channel protein MscS OS=Klebsiella pneumoniae GN=CKQ90_07965 PE=4 SV=1	43.007	10	32	10	286	31.1	7.42	97.8	100.4	101.5	99.3	101.3	99.6
J2LR10	UUU_32910	Murein hydrolase B OS=Klebsiella pneumoniae subsp. pneumoniae DSM 30104 GN=UUU_32910 PE=4 SV=1	54.0741	11	32	11	405	44.901	8.84	99.1	95.7	94.4	104.8	106.6	99.4
B5XZM9	pstS	Phosphate-binding protein PstS OS=Klebsiella pneumoniae (strain 342) GN=pstS PE=3 SV=1	54.9133	17	48	17	346	36.65	8.91	96.1	99.9	98.6	103.5	99.2	102.8
A0A169HNE2	psd	Phosphatidylserine decarboxylase proenzyme OS=Klebsiella pneumoniae GN=psd PE=3 SV=1	65.625	14	47	1	320	35.458	6.43	74.1	88.1	94.1	118.1	108.7	117
A0A098CGS7	dapE	Succinyl-diaminopimelate desuccinylase OS=Klebsiella pneumoniae GN=dapE PE=3 SV=1	54.6667	15	36	15	375	41.358	5.82	102	99.7	99	94.9	108.8	95.7
A0A0E1CB36	KPNJ1_00228	Dipeptide transport ATP-binding protein dppF OS=Klebsiella pneumoniae 30660/NJST258_1 GN=KPNJ1_00228 PE=3 SV=1	56.0831	13	36	13	337	37.651	9.07	93.4	92.9	92.2	105.9	108.9	106.7
A0A0J5A323	SM87_05414	USG-1 protein OS=Klebsiella pneumoniae GN=SM87_05414 PE=3 SV=1	50.4451	13	33	1	337	36.339	4.56	95.8	100	102.1	96.3	105	100.8
A0A060VKA4	dsbC	Thiol:disulfide interchange protein OS=Klebsiella pneumoniae GN=dsbC PE=3 SV=1	62.0253	10	30	2	237	25.439	8.15	91.8	103.4	99.3	102.9	100.8	101.8
A0A2D2PM48	pepT	Peptidase T OS=Klebsiella pneumoniae GN=pepT PE=4 SV=1	71.2195	21	61	2	410	44.863	5.74	82.3	88.1	91.6	107	115.2	115.8
W1B1V4	lysS	Lysine--tRNA ligase OS=Klebsiella pneumoniae IS22 GN=lysS PE=3 SV=1	31.6832	18	69	3	505	57.79	5.24	133	115.5	117	82.5	78.6	73.5
A0A2G3S057	rplS	50S ribosomal protein L19 OS=Klebsiella pneumoniae subsp. pneumoniae GN=rplS PE=4 SV=1	67.8261	9	58	9	115	13.109	10.62	96.4	97.2	97.6	103.6	96.6	108.5
A0A0S3F798	AGG09_04700	Uncharacterized protein OS=Klebsiella pneumoniae GN=AGG09_04700 PE=4 SV=1	59.0786	16	33	2	369	40.413	6.86	101.4	100.9	101.7	97.5	103.4	95.1
A0A0V9RTS0	purF	Amidophosphoribosyltransferase OS=Klebsiella pneumoniae GN=purF PE=3 SV=1	64.5545	21	45	21	505	56.486	5.59	108.5	103.5	103.3	91.6	98.3	94.8
W1B9Y5	hemL	Glutamate-1-semialdehyde 2,1-aminomutase OS=Klebsiella pneumoniae IS22 GN=hemL PE=3 SV=1	33.4247	8	30	1	365	38.876	4.87	105.3	95.2	85.6	96.4	112.8	104.7
A0A1C1PVY0	CR230_11645	Exported protein OS=Klebsiella pneumoniae GN=CR230_11645 PE=4 SV=1	81.2155	8	40	1	181	18.579	6.95	109.1	109.6	109.5	93.5	86.2	92.1
W1HYS6		Biotin carboxyl carrier protein of acetyl-CoA carboxylase OS=Klebsiella pneumoniae IS39 PE=4 SV=1	70.9677	7	41	1	155	16.456	4.74	104.1	105.2	110.1	92.4	98.6	89.6
A0A2A2SU64	BVX91_13665	Cobalt-factor II C(20)-methyltransferase OS=Klebsiella pneumoniae GN=BVX91_13665 PE=3 SV=1	64.135	11	28	2	237	25.533	5.43	89.5	78	82.3	107.2	129.7	113.4
A0A170CGL1	uspG_3	Universal stress protein G OS=Klebsiella pneumoniae GN=uspG_3 PE=3 SV=1	67.1329	10	36	1	143	15.615	8.47	80.9	79.4	81.8	120.3	122.7	114.9
A0A1C3Q9B6	ribE	Riboflavin synthase OS=Klebsiella pneumoniae GN=ribE PE=4 SV=1	80.0948	11	34	1	211	22.999	5.6	97.3	100.1	90.3	91.5	109.5	111.4
C8T3U7	purC	Phosphoribosylaminoimidazole-succinocarboxamide synthase OS=Klebsiella pneumoniae subsp. rhinoscleromatis ATCC 13884 GN=purC PE=3 SV=1	59.9156	11	38	11	237	26.861	5.35	99.4	102.5	102.3	98.5	101	96.3
A0A2D1J7Y6	CR230_26445	Adenosylhomocysteinase OS=Klebsiella pneumoniae GN=CR230_26445 PE=4 SV=1	66.3957	15	32	2	369	40.277	6.18	84.1	73.6	74.6	116.9	125.7	125
A0A2A5IC80	CI704_21190	Dihydroxyacetone kinase subunit DhaK OS=Klebsiella pneumoniae subsp. pneumoniae GN=CI704_21190 PE=4 SV=1	69.1011	15	33	15	356	38.316	5	95.6	99.8	99.9	102	100.7	101.9
A0A0E1CQZ1	malK	Maltose/maltodextrin import ATP-binding protein MalK OS=Klebsiella pneumoniae 30660/NJST258_1 GN=malK PE=3 SV=1	39.2954	10	23	5	369	40.617	6.76	84.3	82.9	83.3	118.7	113.6	117.2
A0A2G8LZL5	CSQ78_13975	Peroxidase OS=Klebsiella pneumoniae GN=CSQ78_13975 PE=4 SV=1	72.9097	18	40	18	299	33.025	5.55	79.9	79.8	79.5	120.4	120.8	119.7
A0A1W2J6G2	AM447_04945	Putative glutamate--cysteine ligase 2 OS=Klebsiella pneumoniae GN=AM447_04945 PE=3 SV=1	57.6819	14	39	14	371	41.769	6.83	101.2	99.7	99.5	97.7	102.3	99.7
A0A2G3RUD2	CS332_15760	Cytosol nonspecific dipeptidase OS=Klebsiella pneumoniae subsp. pneumoniae GN=CS332_15760 PE=4 SV=1	27.4227	10	41	3	485	52.623	5.38	99.3	96.6	97.5	98.2	108.9	99.5
C9K1I2	wza	Integral outer membrane lipoprotein OS=Klebsiella pneumoniae GN=wza PE=4 SV=1	57.1429	12	34	4	378	41.437	6.43	63.2	27.7	27.3	161.2	147.7	172.9
A0A1B2ZQM3	BCB67_20720	Glutathione-dependent disulfide-bond oxidoreductase OS=Klebsiella pneumoniae GN=BCB67_20720 PE=4 SV=1	50.6944	11	51	1	288	32.344	6.32	144	151.6	142.4	58.1	54.2	49.7
A0A2D1IZY8	CR230_10945	Sugar ABC transporter substrate-binding protein OS=Klebsiella pneumoniae GN=CR230_10945 PE=4 SV=1	60.6918	19	55	1	318	34.128	8.25	58.4	56.3	48.5	149.9	151.8	135.2
W1BA39		Lipoprotein OS=Klebsiella pneumoniae IS22 PE=3 SV=1	51.2915	9	30	1	271	29.4	5.29	97.1	99.5	107.5	94.9	100.5	100.5
W9B7R2	BN49_2343	Uncharacterized protein OS=Klebsiella pneumoniae GN=BN49_2343 PE=4 SV=1	51.227	13	42	0	326	34.633	6.23
A0A0E1CAH5	hscA	Chaperone protein HscA OS=Klebsiella pneumoniae 30660/NJST258_1 GN=hscA PE=3 SV=1	42.2078	18	31	18	616	65.383	5.1	94.3	95.1	95.5	104.2	108.6	102.2
C8T4E7	parC	DNA topoisomerase 4 subunit A OS=Klebsiella pneumoniae subsp. rhinoscleromatis ATCC 13884 GN=parC PE=3 SV=1	46.9415	27	51	1	752	83.583	6.7	98.3	96.2	79.5	117	119.1	89.9
A6T702	cmk	Cytidylate kinase OS=Klebsiella pneumoniae subsp. pneumoniae (strain ATCC 700721 / MGH 78578) GN=cmk PE=3 SV=1	72.6872	11	35	1	227	24.859	5.39	83.7	89.8	84.6	115.8	116	110
V0B008	proQ	RNA chaperone ProQ OS=Klebsiella pneumoniae 909957 GN=proQ PE=3 SV=1	55.1111	10	32	10	225	24.959	9.8	98.4	98.5	98.5	101.8	101.6	101.2
W1HWQ1		Pyruvate formate-lyase-activating enzyme OS=Klebsiella pneumoniae IS39 PE=3 SV=1	67.8862	15	45	15	246	28.253	6.27	100.5	98.7	98.1	99.6	100.6	102.4
A0A169E6A9	gshA	Glutamate--cysteine ligase OS=Klebsiella pneumoniae GN=gshA PE=3 SV=1	48.0695	18	33	18	518	58.122	5.44	94.3	95	96.2	104	106.1	104.4
A0A2G3RTA0	CS332_16050	Peptidylprolyl isomerase OS=Klebsiella pneumoniae subsp. pneumoniae GN=CS332_16050 PE=4 SV=1	35.3535	4	69	4	198	20.918	4.93	89.4	88.7	90.6	108.5	110.7	112.1
W8UC83	ribB	3,4-dihydroxy-2-butanone 4-phosphate synthase OS=Klebsiella pneumoniae 30684/NJST258_2 GN=ribB PE=3 SV=1	56.2212	8	26	1	217	23.432	5.2	74.7	71.3	71.2	127	126	129.8
A0A1S0WD93	pepT	Peptidase T OS=Klebsiella pneumoniae GN=pepT PE=3 SV=1	72.1951	21	58	2	410	44.859	5.74	105	112.2	110.8	90.8	87.8	93.5
A0A081LUT9	ahcY	Adenosylhomocysteinase OS=Klebsiella pneumoniae GN=ahcY PE=4 SV=1	66.3957	15	31	2	369	40.291	6.18	121.1	126.8	119.8	75.9	79.6	76.9
A0A2G3RVT0	CS332_12260	Glycine dehydrogenase (Aminomethyl-transferring) OS=Klebsiella pneumoniae subsp. pneumoniae GN=CS332_12260 PE=4 SV=1	22.9885	16	41	2	957	104.268	6.14	91.3	91	94.2	107.3	109.8	106.4
V0APZ9	HMPREF1619_03973	Glycerol-3-phosphate regulon repressor OS=Klebsiella pneumoniae 909957 GN=HMPREF1619_03973 PE=4 SV=1	75	13	32	13	252	27.893	5.95	108.3	103.5	102.2	94.9	97	94
A0A1Y0PVF1	ribB	3,4-dihydroxy-2-butanone 4-phosphate synthase OS=Klebsiella pneumoniae subsp. pneumoniae GN=ribB PE=3 SV=1	56.2212	8	24	1	217	23.433	5.11	111.6	114.1	108.6	91.2	88.6	85.8
A0A2D2EP99	CTI52_26255	UDP-N-acetyl-D-mannosamine dehydrogenase OS=Klebsiella pneumoniae GN=CTI52_26255 PE=4 SV=1	58.5714	17	37	17	420	45.559	5.38	107.2	106.5	106	91.1	101.1	88.1
A0A0E1CHD0	KPNJ1_03889	Asparagine synthetase [glutamine-hydrolyzing] OS=Klebsiella pneumoniae 30660/NJST258_1 GN=KPNJ1_03889 PE=4 SV=1	62.4788	28	49	28	589	66.51	6.33	100.3	101.1	101.8	97.5	101.2	98.1
A0A060VJQ2	parC	DNA topoisomerase 4 subunit A OS=Klebsiella pneumoniae GN=parC PE=3 SV=1	45.2564	27	49	1	780	86.509	6.7	93.5	99.8	87.5	105.9	112.6	100.7
Q6U638	LV077	Uncharacterized protein OS=Klebsiella pneumoniae GN=LV077 PE=4 SV=1	76.6551	19	53	19	287	31.954	5.43	152.9	153.6	154.8	44.9	46.3	47.5
A0A1E3F8F9	BCB67_20090	Ribonuclease G OS=Klebsiella pneumoniae GN=BCB67_20090 PE=4 SV=1	60.3272	22	34	22	489	55.467	6.04	99.2	91.1	89.6	103.9	111.9	104.3
A0A0J4XAN6	SM87_04023	Hydrogen peroxide-inducible genes activator OS=Klebsiella pneumoniae GN=SM87_04023 PE=4 SV=1	61.3115	18	48	1	305	34.229	6.4	92.9	92.9	82	106.3	119.9	106
A0A0E1CJU8	dksA	RNA polymerase-binding transcription factor DksA OS=Klebsiella pneumoniae 30660/NJST258_1 GN=dksA PE=3 SV=1	68.7898	8	41	8	157	18.232	5.36	89.6	89.4	87.9	111.8	114	107.4
A0A1Y0Q310	AN663_23165	Lysine decarboxylase LdcC OS=Klebsiella pneumoniae subsp. pneumoniae GN=AN663_23165 PE=4 SV=1	58.3217	30	54	30	715	81.334	6.16	81.2	78.1	79.1	120.9	120.2	120.5
B5XXF9	iutA	Ferric aerobactin receptor OS=Klebsiella pneumoniae (strain 342) GN=iutA PE=3 SV=1	46.7852	25	42	1	731	80.726	5.06	103.7	54.4	52.1	115.4	142.1	132.4
A0A1C3Q411	frsA	UPF0255 protein BU230_41780 OS=Klebsiella pneumoniae GN=frsA PE=3 SV=1	57.4879	21	44	21	414	46.886	6.96	103.1	104.5	104.9	94.8	99	93.8
A0A1W1KDJ9	SAMEA4362597_02594	Arylsulfatase OS=Klebsiella pneumoniae GN=SAMEA4362597_02594 PE=4 SV=1	59.7087	14	36	14	206	23.067	9.42	101.8	103	103.4	99.5	95.4	96.9
B5XXH9	fabH	3-oxoacyl-[acyl-carrier-protein] synthase 3 OS=Klebsiella pneumoniae (strain 342) GN=fabH PE=3 SV=1	52.9968	11	37	1	317	33.427	5.08	106.9	109.4	113.3	93.1	86.6	90.7
A0A1C3PII6	yebC	Probable transcriptional regulatory protein SAMEA3531848_00099 OS=Klebsiella pneumoniae GN=yebC PE=3 SV=1	41.8699	9	32	9	246	26.331	4.86	89.9	90.8	90.7	109.5	110.5	108.6
A0A060VH39	KpST82_1897	Uncharacterized protein OS=Klebsiella pneumoniae GN=KpST82_1897 PE=1 SV=1	75.8503	14	29	1	294	32.802	6.8	89.1	88.5	74	106.3	129.7	112.4
W8UU78	KPNJ2_00722	PIR3 protein OS=Klebsiella pneumoniae 30684/NJST258_2 GN=KPNJ2_00722 PE=4 SV=1	53.3333	10	33	10	225	23.83	5.16	80	73.6	73.2	123.7	127.2	122.3
A0A237QGU9	secD	Protein translocase subunit SecD OS=Klebsiella pneumoniae GN=secD PE=3 SV=1	51.8699	27	59	26	615	66.676	7.96	100.5	99.3	99.6	97.6	103.7	99.4
A0A2G4PYS3	CS372_10715	Sugar phosphatase OS=Klebsiella pneumoniae GN=CS372_10715 PE=4 SV=1	57.9909	8	20	2	219	23.511	4.87	98.2	93.1	101.1	106.1	103.7	97.9
A0A0J4WWC8	SM87_05504	Uncharacterized protein OS=Klebsiella pneumoniae GN=SM87_05504 PE=4 SV=1	53.0026	17	41	1	383	41.841	6.34	129.6	120.4	130.5	69.2	83.1	67.3
A0A0J4XVN7	SM87_01839	Putrescine-binding periplasmic protein OS=Klebsiella pneumoniae GN=SM87_01839 PE=3 SV=1	55.1724	19	52	19	348	38.835	5.64	97.6	101.8	102	102.4	96.9	99.3
R4YFD4	dfp	Coenzyme A biosynthesis bifunctional protein CoaBC OS=Klebsiella pneumoniae subsp. rhinoscleromatis SB3432 GN=dfp PE=3 SV=1	58.7654	19	38	19	405	43.438	7.52	105.4	106.4	105.8	94.2	96.7	91.5
A0A164GXP1	usg	Aspartate-semialdehyde dehydrogenase OS=Klebsiella pneumoniae GN=usg PE=3 SV=1	50.4451	13	32	1	337	36.241	4.56	50.3	45.6	49.3	150.7	147.3	156.7
A0A1B3A8E6	BCB67_14090	Tellerium resistance protein TerY OS=Klebsiella pneumoniae GN=BCB67_14090 PE=4 SV=1	67.9245	11	34	2	212	22.604	5.05	177.7	178.5	173.5	24.7	22.4	23.1
W9BD71	purH	Bifunctional purine biosynthesis protein PurH OS=Klebsiella pneumoniae GN=purH PE=3 SV=1	63.5161	24	44	1	529	57.084	5.77	86.7	81.5	80.2	130.9	113.1	107.6
W8UAV0	KPNJ2_00249	Zinc protease OS=Klebsiella pneumoniae 30684/NJST258_2 GN=KPNJ2_00249 PE=4 SV=1	51.3619	18	35	18	514	57.159	6.02	102	99.6	98.2	99.9	101.7	98.7
A0A0J4XT90	nadR	Multifunctional transcriptional regulator/nicotinamide-nucleotide adenylyltransferase/ribosylnicotinamide kinase NadR OS=Klebsiella pneumoniae GN=nadR PE=4 SV=1	70.7317	23	35	23	410	47.188	6.18	101.3	100.9	100.1	97.7	102.2	97.7
A0A170ISM5	SAMEA3531778_02421	Uncharacterized conserved protein OS=Klebsiella pneumoniae GN=SAMEA3531778_02421 PE=4 SV=1	55.9896	16	37	16	384	44.401	5.67	48.3	41.1	44.1	159.4	152.7	154.5
A0A0E1CLH7	KPNJ1_03632	Arginine-binding protein OS=Klebsiella pneumoniae 30660/NJST258_1 GN=KPNJ1_03632 PE=3 SV=1	62.4	12	34	12	250	27.34	7.03	104.4	108.5	107.3	94.3	94.1	91.4
A0A237N7X7	AN663_00980	Acetate operon transcriptional repressor IclR OS=Klebsiella pneumoniae subsp. pneumoniae GN=AN663_00980 PE=4 SV=1	78.9855	17	39	17	276	29.756	8.02	114.5	114.2	115.1	84.8	86.4	85
A0A1Y0PXF9	rplR	50S ribosomal protein L18 OS=Klebsiella pneumoniae subsp. pneumoniae GN=rplR PE=3 SV=1	66.6667	9	66	9	117	12.762	10.42	94.4	95.1	94.7	106.1	100.1	109.7
A0A0J4XL60	rpsI	30S ribosomal protein S9 OS=Klebsiella pneumoniae GN=rpsI PE=3 SV=1	52.3077	7	74	7	130	14.817	10.95	95.8	95.9	96.6	106.2	97	108.5
A0A1W6AKX6	blaCTX-M	Beta-lactamase (Fragment) OS=Klebsiella pneumoniae GN=blaCTX-M PE=3 SV=1	79.8817	12	41	1	169	17.777	9	80.3	79.3	81.5	113.5	115.2	130.1
A0A060VHY8	B4U21_12285	Heat-shock protein OS=Klebsiella pneumoniae GN=B4U21_12285 PE=3 SV=1	66.242	7	32	2	157	17.577	5.58	110.4	118.1	116.2	83.2	83.1	89.1
A0A0E1CGK0	hisG	ATP phosphoribosyltransferase OS=Klebsiella pneumoniae 30660/NJST258_1 GN=hisG PE=3 SV=1	53.5117	11	25	11	299	33.192	6.01	106.2	95.6	95.5	98.1	106.2	98.4
A0A060VTB3	sufS	Cysteine desulfurase OS=Klebsiella pneumoniae GN=sufS PE=3 SV=1	50.2463	14	32	5	406	43.738	6.19	93.9	95.7	97.3	103.8	105.3	103.9
A0A060VHK0	yncD	YncD protein OS=Klebsiella pneumoniae GN=yncD PE=3 SV=1	43.5093	20	33	20	701	77.059	6.09	99.2	97	98.3	99.9	104.5	101.1
C8T6K4	yeaE	Oxidoreductase, aldo/keto reductase family protein OS=Klebsiella pneumoniae subsp. rhinoscleromatis ATCC 13884 GN=yeaE PE=4 SV=1	75.8503	14	31	1	294	32.774	6.8	113.9	118.4	127	78.3	91.9	70.5
A0A1C3PZZ6	dhaK_1	Dihydroxyacetone kinase, ATP-dependent OS=Klebsiella pneumoniae GN=dhaK_1 PE=4 SV=1	36.7942	16	37	1	549	57.366	5.22	98.9	108.8	110.1	96.2	86.6	99.3
A0A2G4Y703	CQB04_26805	Protein CapI OS=Klebsiella pneumoniae GN=CQB04_26805 PE=4 SV=1	51.1976	13	43	2	334	37.526	6.29	101.3	96.9	91.5	100.3	104.4	105.5
A0A1V8CTW5	BL102_0005225	Oxidoreductase OS=Klebsiella pneumoniae GN=BL102_0005225 PE=4 SV=1	55.9271	14	37	14	329	36.239	6.13	88.5	88.2	88.3	101.1	132	101.9
A0A2G4RYG7	CAK82_00675	Chromosome partition protein MukE OS=Klebsiella pneumoniae GN=CAK82_00675 PE=4 SV=1	63.2479	11	24	11	234	27.028	5.06	99.8	97	97	100.8	105.3	100.2
A0A1Y0PX80	B5K12_08735	Glycerophosphoryl diester phosphodiesterase OS=Klebsiella pneumoniae subsp. pneumoniae GN=B5K12_08735 PE=4 SV=1	60.9551	17	42	3	356	40.302	6.6	93.9	99.8	97.6	103.8	105.8	99.1
A0A0J4X5Z8	SM87_04729	Outer membrane protein C OS=Klebsiella pneumoniae GN=SM87_04729 PE=4 SV=1	20.3209	4	72	2	374	40.799	5.14	85.9	101.5	83.9	110.6	110.5	107.6
A0A0E1CRA0	KPNJ1_05421	Phosphatase, HAD superfamily protein OS=Klebsiella pneumoniae 30660/NJST258_1 GN=KPNJ1_05421 PE=4 SV=1	60.3015	10	39	10	199	22.69	5.26	94.9	94.8	95.2	105	105.2	104.9
A0A0H3GWC1	prmA	Ribosomal protein L11 methyltransferase OS=Klebsiella pneumoniae subsp. pneumoniae (strain HS11286) GN=prmA PE=3 SV=1	57.6792	10	29	1	293	31.852	4.54	92.8	97.9	102.7	100.6	109.6	96.5
B5XND9	prmA	Ribosomal protein L11 methyltransferase OS=Klebsiella pneumoniae (strain 342) GN=prmA PE=3 SV=1	57.6792	10	28	1	293	31.878	4.56	104.5	102.3	105.3	96.6	97.5	93.9
W1EFK5		NAD(P)H-flavin reductase OS=Klebsiella pneumoniae IS53 PE=4 SV=1	59.6567	12	27	12	233	26.363	5.05	98.3	92.9	94	106.7	104.6	103.6
A0A2A2NH75	lamB	Maltoporin (Fragment) OS=Klebsiella pneumoniae GN=lamB PE=4 SV=1	70.4663	10	40	1	193	21.217	5.6	163.6	154.3	148.4	42.2	41.2	50.3
A0A098CIB2	dsbC	Thiol:disulfide interchange protein OS=Klebsiella pneumoniae GN=dsbC PE=3 SV=1	62.0253	10	29	2	237	25.437	7.84	98.5	110.9	107.6	98	90.6	94.4
A0A2G4Q433	CR231_18790	Oxidoreductase OS=Klebsiella pneumoniae GN=CR231_18790 PE=4 SV=1	69.863	13	32	2	292	31.426	6.1	82.5	88.3	86	116.3	111.4	115.5
A0A0S3FGP9	AGG09_22925	Polysaccharide export protein OS=Klebsiella pneumoniae GN=AGG09_22925 PE=4 SV=1	49.2063	11	34	4	378	41.691	6.27	49.1	44.2	43.5	156	153	154.1
A0A181Q0X4	ypwA	Thermostable carboxypeptidase 1 OS=Klebsiella pneumoniae GN=ypwA PE=4 SV=1	54.7297	16	32	1	444	50.859	5.39	47.4	50.8	51.1	156.1	149.1	145.5
A0A1W1L4C6	gudD	Glucarate dehydratase OS=Klebsiella pneumoniae GN=gudD PE=3 SV=1	49.7758	13	31	2	446	48.917	6.18	84.3	84.1	91.4	114.9	110.9	114.4
A0A1C3PU43	nadC	Carboxylating nicotinate-nucleotide diphosphorylase OS=Klebsiella pneumoniae GN=nadC PE=3 SV=1	56.9024	13	31	13	297	32.698	5.19	101.2	96.2	95.7	101.3	105.3	100.3
A0A0J4VRW7	pdxJ	Pyridoxine 5'-phosphate synthase OS=Klebsiella pneumoniae GN=pdxJ PE=3 SV=1	65.0206	11	40	3	243	26.471	6.07	97.8	98.9	98.9	100.9	98.8	104.8
W8VDV5	cca	Multifunctional CCA protein OS=Klebsiella pneumoniae 30684/NJST258_2 GN=cca PE=3 SV=1	63.357	22	38	22	423	46.987	7.34	99.7	100.4	100.5	96.9	101.5	100.9
W1E2L9		Sigma factor RpoE negative regulatory protein RseB OS=Klebsiella pneumoniae IS46 PE=4 SV=1	48.9164	12	34	12	323	35.554	5.6	104.3	99.8	99.5	98.9	98.6	98.9
A0A2D2EEV2	CTI52_07930	Sugar phosphatase OS=Klebsiella pneumoniae GN=CTI52_07930 PE=4 SV=1	62.5571	9	20	3	219	23.422	4.93	92.9	102.1	106	99.2	99.5	100.3
V0AB75	mnmE	tRNA modification GTPase MnmE OS=Klebsiella pneumoniae 909957 GN=mnmE PE=3 SV=1	61.674	20	28	20	454	49.04	5.12	107.8	95.1	93.9	100.9	104.5	97.8
J2E910	UUU_04230	SIS domain protein OS=Klebsiella pneumoniae subsp. pneumoniae DSM 30104 GN=UUU_04230 PE=4 SV=1	52.0833	11	22	11	336	38.479	5.78	109.9	112.1	111.7	88.7	89.8	87.8
A0A081IF33	hemE	Uroporphyrinogen decarboxylase OS=Klebsiella pneumoniae GN=hemE PE=3 SV=1	55.6497	13	29	1	354	39.197	6.37	88.6	91.7	92.4	103.4	116.4	107.6
A0A0E1C9P5	rpoS	RNA polymerase sigma factor RpoS OS=Klebsiella pneumoniae 30660/NJST258_1 GN=rpoS PE=3 SV=1	53.8251	14	32	13	366	41.94	5.3	86.3	88.9	90	109.2	115.8	109.8
A0A0J4XX19	ybbH_3	MurR/RpiR family transcriptional regulator OS=Klebsiella pneumoniae GN=ybbH_3 PE=4 SV=1	35.7895	7	17	7	285	31.63	5.53	98	100.8	98.9	97	104.4	100.9
A0A2G8A9E9	C630_25195	Porin OS=Klebsiella pneumoniae subsp. pneumoniae KpO3210 GN=C630_25195 PE=4 SV=1	81.2155	8	37	1	181	18.552	6.8	148.3	152.5	154.1	42	53.9	49.2
B5XZZ3	KPK_3980	Putative sugar-binding domain protein OS=Klebsiella pneumoniae (strain 342) GN=KPK_3980 PE=4 SV=1	69.3038	17	33	17	316	34.392	6.11	93.4	93.8	92.4	109.3	106.4	104.6
A0A263K892	BB785_00975	Selenocysteinyl-tRNA-specific translation elongation factor SelB OS=Klebsiella pneumoniae GN=BB785_00975 PE=4 SV=1	45.5139	21	37	21	613	68.519	7.47	101.1	99.9	100.8	97.2	103.9	97.1
A0A1B3A5U9	BCB67_20335	Arabinose 5-phosphate isomerase OS=Klebsiella pneumoniae GN=BCB67_20335 PE=3 SV=1	73.1707	16	30	16	328	35.107	5.87	90.4	90.7	89.7	109	111	109.2
A0A236C3G5	AN663_10930	Probable lipid kinase YegS-like OS=Klebsiella pneumoniae subsp. pneumoniae GN=AN663_10930 PE=3 SV=1	52.5253	14	40	14	297	31.776	5.1	116.5	104.8	103.6	89.2	96.9	89.1
A0A2H2W1R4	BB785_28505	Tellerium resistance protein TerY OS=Klebsiella pneumoniae GN=BB785_28505 PE=4 SV=1	67.9245	10	32	1	212	22.662	4.96	52.7	50.8	49.8	157.9	137.8	151
A0A193SDP5	wza	Polysaccharide export protein OS=Klebsiella pneumoniae GN=wza PE=4 SV=1	49.6021	11	33	3	377	41.529	6.96	135.4	143.1	143.1	60.3	62.5	55.6
A0A081LXV7	hemN_2	Coproporphyrinogen-III oxidase OS=Klebsiella pneumoniae GN=hemN_2 PE=3 SV=1	42.2319	12	21	12	457	52.146	6.11	99.2	92.6	88.7	104.7	109.1	105.7
A0A2D0AWX9	B5K12_19150	Lysozyme OS=Klebsiella pneumoniae subsp. pneumoniae GN=B5K12_19150 PE=4 SV=1	66.6667	9	50	9	105	11.612	5.14	154.6	164.4	161.2	40.3	40.9	38.6
A0A1Y0PWL5	bepA	Beta-barrel assembly-enhancing protease OS=Klebsiella pneumoniae subsp. pneumoniae GN=bepA PE=3 SV=1	40.6571	13	25	13	487	53.556	7.71	104.8	102.4	99.9	98.8	101.3	92.8
W8VFX0	KPNJ2_02021	Uncharacterized protein OS=Klebsiella pneumoniae 30684/NJST258_2 GN=KPNJ2_02021 PE=4 SV=1	61.5044	10	25	10	226	24.049	5.88	107.9	108.5	109.6	89.9	92	92.1
A0A2D2EL61	CTI52_20170	Adenylate kinase OS=Klebsiella pneumoniae GN=CTI52_20170 PE=4 SV=1	54.2056	11	45	1	214	23.544	6.04	93.1	100.2	100.6	110.7	98.8	96.6
B5XPD4	cpsG_2	Phosphomannomutase OS=Klebsiella pneumoniae (strain 342) GN=cpsG_2 PE=3 SV=1	54.1304	23	55	2	460	50.808	5.47	125.6	135.8	128.8	71.3	67.9	70.8
W8USH0	KPNJ2_00107	Sulfate-binding protein OS=Klebsiella pneumoniae 30684/NJST258_2 GN=KPNJ2_00107 PE=4 SV=1	59.7701	16	32	16	348	38.754	8.75	111.6	111.4	111.2	84.6	92.1	89.1
A0A2D3CP65	KPH11_00460	Competence/damage-inducible protein A OS=Klebsiella pneumoniae subsp. pneumoniae GN=KPH11_00460 PE=4 SV=1	49.7487	14	26	4	398	43.411	5.36	107.1	108.9	104.3	94.3	99.8	85.7
A0A2A2SP97	BVX91_22795	CinA-like protein OS=Klebsiella pneumoniae GN=BVX91_22795 PE=3 SV=1	49.7487	14	26	4	398	43.431	5.45	134.2	85.6	93.2	83.2	120.7	83.2
A6T6J4	modC	Molybdenum import ATP-binding protein ModC OS=Klebsiella pneumoniae subsp. pneumoniae (strain ATCC 700721 / MGH 78578) GN=modC PE=3 SV=1	47.0255	11	23	9	353	38.703	8.87	104.7	103	104.4	95.5	97.6	94.8
A0A1C3PLQ7	pdxJ	Pyridoxine 5'-phosphate synthase OS=Klebsiella pneumoniae GN=pdxJ PE=3 SV=1	60.4938	10	32	2	243	26.396	6.38	101.6	100.4	101.3	103.8	93.8	99.1
A0A060VIL8	aroD	3-dehydroquinate dehydratase OS=Klebsiella pneumoniae GN=aroD PE=3 SV=1	60.3922	11	27	11	255	27.714	5.5	98.4	95.9	96.3	99.3	107.5	102.5
A0A169KXG6	stpA	DNA-binding protein OS=Klebsiella pneumoniae GN=stpA PE=3 SV=1	75.188	10	34	5	133	15.15	8.94	98.1	97.2	97.7	102.7	104.4	99.9
W1ATX6	nqrF	Na(+)-translocating NADH-quinone reductase subunit F OS=Klebsiella pneumoniae IS22 GN=nqrF PE=3 SV=1	57.9853	18	38	18	407	45.253	5.29	95.2	97.1	97.9	104	103.3	102.6
A0A060VGF7	solA	N-methyl-L-tryptophan oxidase OS=Klebsiella pneumoniae GN=solA PE=3 SV=1	60.4839	14	32	14	372	40.333	5.5	99.4	98.1	98.5	101.9	102.2	99.8
A0A2D2EJC8	CTI52_16555	Dihydroorotase OS=Klebsiella pneumoniae GN=CTI52_16555 PE=4 SV=1	66.954	16	34	16	348	38.822	6.35	96.3	90.2	91	105.3	108.5	108.9
A0A1S0WC70	CTI63_16155	Glutathione-dependent formaldehyde dehydrogenase OS=Klebsiella pneumoniae GN=CTI63_16155 PE=4 SV=1	63.9798	16	32	16	397	42.643	6.13	121.7	121.5	117.6	75.7	85.4	78.1
Q6U5Z9	def	Peptide deformylase OS=Klebsiella pneumoniae GN=def PE=3 SV=1	78.1065	10	30	9	169	19.407	5.49	154.1	160	156.5	40.5	48.5	40.4
A0A2D2FK71	CTI55_08455	Phosphomannomutase OS=Klebsiella pneumoniae GN=CTI55_08455 PE=4 SV=1	55.7018	24	56	3	456	50.279	5.54	140	147.1	145	55.7	57.9	54.3
A0A1S0WD19	mdoH	Glucans biosynthesis glucosyltransferase H OS=Klebsiella pneumoniae GN=mdoH PE=3 SV=1	33.4917	22	39	17	842	96.015	8.73	104.5	100.2	101.2	96.1	96	102
A0A1S8YCI1	BU230_28000	Thiosulfate transporter subunit OS=Klebsiella pneumoniae GN=BU230_28000 PE=4 SV=1	66.8639	19	45	19	338	37.549	8.91	109.3	111.4	110.9	88.5	90.8	89
A0A0J4YXS1	SM87_04345	NADH:flavin oxidoreductase OS=Klebsiella pneumoniae GN=SM87_04345 PE=4 SV=1	41.8033	12	36	1	366	39.483	5.95	98.6	108.7	108.6	95.2	95.4	93.5
A0A2C6XYH5	prfB	Peptide chain release factor 2 OS=Klebsiella pneumoniae subsp. pneumoniae GN=prfB PE=3 SV=1	49.0411	15	37	15	365	41.208	4.78	98.7	98.2	99.4	99.9	103.5	100.4
J2XBP8	carA	Carbamoyl-phosphate synthase small chain OS=Klebsiella pneumoniae subsp. pneumoniae DSM 30104 GN=carA PE=3 SV=1	54.4757	13	35	13	391	42.139	5.83	107.8	109.2	109.6	91.3	92.2	90
A0A2D2G637	CTI55_08385	Capsule assembly Wzi family protein OS=Klebsiella pneumoniae GN=CTI55_08385 PE=4 SV=1	45.929	15	46	1	479	52.954	6	61.5	60	64	139.5	127.2	147.8
A0A1Y0Q108	msrB	Peptide methionine sulfoxide reductase MsrB OS=Klebsiella pneumoniae subsp. pneumoniae GN=msrB PE=3 SV=1	92.7007	9	41	2	137	15.282	6.16	117.9	125.7	122.1	76.6	75.3	82.4
A0A2D0AW88	B5K12_18990	Uncharacterized protein OS=Klebsiella pneumoniae subsp. pneumoniae GN=B5K12_18990 PE=4 SV=1	60.5351	13	34	13	299	33.773	5.48	144.8	151.2	146.9	47.7	58.3	51.1
A0A2G8AS74	C630_07220	Methyltransferase OS=Klebsiella pneumoniae subsp. pneumoniae KpO3210 GN=C630_07220 PE=4 SV=1	85.3881	12	33	1	219	24.108	5.4	68.2	70.9	74.9	133.2	127.6	125.3
A0A1W1J4H3	fliY_3	Extracellular solute-binding protein OS=Klebsiella pneumoniae GN=fliY_3 PE=4 SV=1	50	7	23	1	228	24.425	6.52	83.3	85	91	97.7	113.3	129.7
A0A0S3F8R0	dnaX	DNA polymerase III subunit gamma/tau OS=Klebsiella pneumoniae GN=dnaX PE=3 SV=1	46.7717	22	34	22	635	69.562	6.51	99.4	93.8	93.4	99.1	111.6	102.7
A0A0C7KEG7	fliY_4	Amino acid ABC transporter substrate-binding protein OS=Klebsiella pneumoniae GN=fliY_4 PE=4 SV=1	50	7	21	1	228	24.43	6.2	102	111.5	109.2	86.5	99.7	91.1
A0A1S0W4Z1	hemE	Uroporphyrinogen decarboxylase OS=Klebsiella pneumoniae GN=hemE PE=3 SV=1	55.6497	13	28	1	354	39.187	6.37	86.5	86.8	88	128.9	99.3	110.4
C8SZP7	yhjG2	AsmA family protein OS=Klebsiella pneumoniae subsp. rhinoscleromatis ATCC 13884 GN=yhjG2 PE=4 SV=1	58.5294	17	39	2	340	37.505	9.28	98.9	99.9	97.4	99.9	106.2	97.7
A0A2D3CZW6	KPH11_20710	Cytosine deaminase OS=Klebsiella pneumoniae subsp. pneumoniae GN=KPH11_20710 PE=4 SV=1	59.5455	17	38	1	440	48.884	5.99	115.2	110.8	108.7	78.6	99.6	87.2
A0A2A5IJG2	pyrD	Dihydroorotate dehydrogenase (quinone) OS=Klebsiella pneumoniae subsp. pneumoniae GN=pyrD PE=3 SV=1	54.4643	15	28	15	336	36.715	8.13	97.2	97.6	97.2	101	106.9	100.1
W8UL12	KPNJ2_02975	Mannose-6-phosphate isomerase OS=Klebsiella pneumoniae 30684/NJST258_2 GN=KPNJ2_02975 PE=3 SV=1	40.4523	12	43	1	398	43.21	5.45	108.2	103.3	99.6	88.6	103.2	97.2
A0A2D2PM68	CR231_09205	Mannose-6-phosphate isomerase OS=Klebsiella pneumoniae GN=CR231_09205 PE=4 SV=1	41.1765	13	42	2	391	42.397	5.35	62.3	63.9	60	137	135.4	141.5
A0A1S0WBK7	msrB	Peptide methionine sulfoxide reductase MsrB OS=Klebsiella pneumoniae GN=msrB PE=3 SV=1	92.7007	8	39	1	137	15.268	6.16	101.4	108.2	113.8	88.7	99.8	88.2
A6TAI1	ihfA	Integration host factor subunit alpha OS=Klebsiella pneumoniae subsp. pneumoniae (strain ATCC 700721 / MGH 78578) GN=ihfA PE=3 SV=1	73.7374	13	47	13	99	11.346	9.7	92.8	93.1	93.6	107.9	107.1	105.5
J2X1U3	UUU_40160	Leucine-specific-binding protein LivK OS=Klebsiella pneumoniae subsp. pneumoniae DSM 30104 GN=UUU_40160 PE=4 SV=1	74.1935	16	48	13	372	39.396	6.93	95.8	99.3	101.7	102.6	99.7	100.8
A0A060VLE1	fabA	3-hydroxydecanoyl-[acyl-carrier-protein] dehydratase OS=Klebsiella pneumoniae GN=fabA PE=3 SV=1	52.3316	11	45	11	193	21.546	6.8	106.4	105.5	104.8	95.8	94.4	93.2
A0A2D2PVW7	CR231_25570	GTPase HflX OS=Klebsiella pneumoniae GN=CR231_25570 PE=4 SV=1	44.6009	18	38	18	426	48.039	6.15	101.8	101.1	98.5	100.2	100.6	97.8
R4YB75	aroB	3-dehydroquinate synthase OS=Klebsiella pneumoniae subsp. rhinoscleromatis SB3432 GN=aroB PE=3 SV=1	56.5934	13	28	13	364	39.174	5.69	96.7	96.5	96.8	102.7	101.9	105.5
A0A230TPG3	map	Methionine aminopeptidase OS=Klebsiella pneumoniae GN=map PE=3 SV=1	82.197	15	46	2	264	29.16	5.82	110.1	121.8	124.9	85.1	77	81
A0A2G3RWC9	CS332_10435	Adenylosuccinate lyase OS=Klebsiella pneumoniae subsp. pneumoniae GN=CS332_10435 PE=4 SV=1	28.2895	15	37	1	456	51.594	6.13	127.8	140.2	130	60.1	77.4	64.6
M5AJD0	uge	Uridine diphosphate galacturonate 4-epimerase OS=Klebsiella pneumoniae GN=uge PE=4 SV=1	53.8922	15	36	1	334	37.542	5.66	130.6	112.7	94.3	87.7	95.9	78.8
A0A060VJ16	KpST82_3456	Arsenate reductase OS=Klebsiella pneumoniae GN=KpST82_3456 PE=3 SV=1	74.7899	7	37	5	119	13.322	7.2	87.6	87.8	84.8	113.6	109.8	116.4
A0A0H3GK15	KPHS_15570	UPF0271 protein KPHS_15570 OS=Klebsiella pneumoniae subsp. pneumoniae (strain HS11286) GN=KPHS_15570 PE=3 SV=1	62.753	12	25	1	247	26.388	5.88	120.4	108.4	114.2	79	85.6	92.4
A0A1Y0PU18	AN663_03295	Glutaredoxin OS=Klebsiella pneumoniae subsp. pneumoniae GN=AN663_03295 PE=3 SV=1	86.747	8	41	8	83	9.143	6.52	100.5	102.2	103.8	98.3	98.4	96.9
A0A060VRJ9	mutL	DNA mismatch repair protein MutL OS=Klebsiella pneumoniae GN=mutL PE=3 SV=1	36.3489	13	23	5	619	67.568	6.81	92.4	91.8	95.7	101.6	111.8	106.7
A0A1W1RKH1	psd	Phosphatidylserine decarboxylase proenzyme OS=Klebsiella pneumoniae GN=psd PE=3 SV=1	52.5	12	39	3	320	35.49	6.71	95.2	102.6	96.1	101.3	107.3	97.5
A0A0E1CGI4	ihfB	Integration host factor subunit beta OS=Klebsiella pneumoniae 30660/NJST258_1 GN=ihfB PE=3 SV=1	60.7843	7	57	7	102	11.446	9	101.9	106.2	105	98.2	90.5	98.1
A0A0E1GUW8	artJ_1	ABC transporter arginine-binding protein 1 OS=Klebsiella pneumoniae GN=artJ_1 PE=3 SV=1	61.7284	9	22	9	243	26.777	8.65	97.1	97.2	97.9	101.5	103.6	102.8
A0A1E3F4Y7	BCB67_24640	DNA-binding transcriptional regulator OxyR OS=Klebsiella pneumoniae GN=BCB67_24640 PE=4 SV=1	61.3115	18	47	1	305	34.224	6.47	102.2	89.4	87.8	100.2	114.1	106.3
W9BAM1	sopB	SopB protein OS=Klebsiella pneumoniae GN=sopB PE=3 SV=1	69.0402	18	37	2	323	35.296	6.73	63.5	65.2	66.4	132.4	136.3	136.3
A0A2G4YH76	CQB04_12380	16S rRNA (Cytidine(1402)-2'-O)-methyltransferase OS=Klebsiella pneumoniae GN=CQB04_12380 PE=4 SV=1	63.0662	12	22	1	287	31.544	6.13	115.8	122.9	117.2	90.3	84.5	69.4
J2EA14	rsgA	Small ribosomal subunit biogenesis GTPase RsgA OS=Klebsiella pneumoniae subsp. pneumoniae DSM 30104 GN=rsgA PE=3 SV=1	44.7802	13	23	13	364	40.495	6.18	101.9	103.3	102.8	98.2	100.7	93.1
A0A169NUY7	ybgL	UPF0271 protein SAMEA3531778_02095 OS=Klebsiella pneumoniae GN=ybgL PE=3 SV=1	62.753	12	25	1	247	26.502	6.05	92.1	81.7	87.3	112.9	114.7	111.4
A0A2A5PND9	treA	Alpha,alpha-trehalase (Fragment) OS=Klebsiella pneumoniae GN=treA PE=4 SV=1	67.3684	13	49	1	190	21.939	6.11	110.1	104.3	103.3	89.6	99.6	93.1
A6TES2	accB	Biotin carboxyl carrier protein of acetyl-CoA carboxylase OS=Klebsiella pneumoniae subsp. pneumoniae (strain ATCC 700721 / MGH 78578) GN=accB PE=4 SV=1	70.9677	7	30	1	155	16.426	4.74	94.6	88.9	92.9	103	117.6	103.1
A0A1C3PRL7	eutG	Putative iron-containing alcohol dehydrogenase OS=Klebsiella pneumoniae GN=eutG PE=4 SV=1	36.272	8	18	1	397	41.991	5.25	87.5	79.9	80.5	117.2	134.8	100.1
A0A0C7KGJ0	bglA_2	6-phospho-beta-glucosidase BglA OS=Klebsiella pneumoniae GN=bglA_2 PE=3 SV=1	37.9455	15	34	14	477	54.975	5.73	113.5	113.9	113.4	83.4	94.5	81.3
W1B481		Glycine dehydrogenase (aminomethyl-transferring) OS=Klebsiella pneumoniae IS22 PE=3 SV=1	25.8106	12	31	1	771	83.628	6.49	78.3	93.4	98.2	109.1	112.6	108.3
A0A1W1KFC3	deaD	ATP-dependent RNA helicase DeaD OS=Klebsiella pneumoniae GN=deaD PE=3 SV=1	45.5677	20	31	20	643	72.174	8.46	69.6	65.3	65.6	132.5	138.9	127.9
A0A1B3A897	BCB67_14045	Tellurium resistance protein TerA OS=Klebsiella pneumoniae GN=BCB67_14045 PE=4 SV=1	49.6084	16	38	1	383	41.84	6.34	130.7	132	133.2	63.5	80	60.6
A0A236RCW3	CI704_09020	ROK family transcriptional regulator OS=Klebsiella pneumoniae subsp. pneumoniae GN=CI704_09020 PE=4 SV=1	64.2857	20	35	2	406	44.296	7.68	110.2	102.1	104.6	90.8	96	96.2
A0A0A5RLB5	lptB_4	ABC transporter ATP-binding protein OS=Klebsiella pneumoniae GN=lptB_4 PE=4 SV=1	66.39	13	39	1	241	26.812	6.04	90.7	87.8	91.9	106.6	114.8	108.3
W1G8H1		Phenylacetic acid degradation protein PaaY OS=Klebsiella pneumoniae ISC21 PE=4 SV=1	89.2857	13	40	11	196	21.166	6.33	141.1	144.3	144.5	54.2	59.8	56.1
V0APL9	HMPREF1619_04312	Outer membrane lipoprotein blc OS=Klebsiella pneumoniae 909957 GN=HMPREF1619_04312 PE=4 SV=1	57.6923	10	30	1	182	20.335	9.51	119.5	109.7	108.3	90.4	92.9	79
W1EJX3		Uncharacterized protein OS=Klebsiella pneumoniae IS53 PE=4 SV=1	41.6256	13	27	1	406	44.114	8.92	102.5	99.5	100.9	101.1	101.7	94.2
A0A0W8ATY5	AGG09_20975	Membrane protein OS=Klebsiella pneumoniae GN=AGG09_20975 PE=4 SV=1	62.6214	11	42	11	206	22.32	5.69	101.2	99.5	98.3	99.5	103.3	98.2
A0A0J4M3U5	glyQ	Glycine--tRNA ligase alpha subunit OS=Klebsiella pneumoniae GN=glyQ PE=3 SV=1	36.6337	9	29	1	303	34.696	5.11	111.9	84.5	82.9	107.5	103.5	109.6
A0A1Y0Q7A9	argH	Argininosuccinate lyase OS=Klebsiella pneumoniae subsp. pneumoniae GN=argH PE=3 SV=1	58.4245	17	32	17	457	50.053	5.33	107.4	105.4	105.2	90.8	98.1	93.2
A6T5N9	ybaL	Putative transport protein OS=Klebsiella pneumoniae subsp. pneumoniae (strain ATCC 700721 / MGH 78578) GN=ybaL PE=3 SV=1	25.9857	11	20	11	558	59.335	5.12	105.1	106.2	104.1	92.1	99.8	92.6
A0A0C7KFT1	xylF_1	D-xylose-binding periplasmic protein OS=Klebsiella pneumoniae GN=xylF_1 PE=4 SV=1	57.4713	11	36	11	348	36.638	5.74	63.6	64.3	64.3	139.4	131.4	137.1
A0A1S8YGB5	pepE	Peptidase E OS=Klebsiella pneumoniae GN=pepE PE=3 SV=1	50.2183	9	31	9	229	24.385	6.52	81.5	83.1	85.3	118.5	111.9	119.7
A0A1L5UN82	ribD	Riboflavin biosynthesis protein RibD OS=Klebsiella pneumoniae GN=ribD PE=3 SV=1	58.5831	15	26	15	367	40.055	7.59	101.9	100.3	101.7	96.5	104.1	95.5
W1ECI5		SSU ribosomal protein S5p (S2e) OS=Klebsiella pneumoniae IS53 PE=4 SV=1	91.6667	8	47	1	72	7.406	9.32	108.3	86.8	65.8	108.8	118.2	112.1
J2XB72	UUU_06680	Acyl-CoA dehydrogenase OS=Klebsiella pneumoniae subsp. pneumoniae DSM 30104 GN=UUU_06680 PE=4 SV=1	31.8563	21	35	21	835	91.792	8.25	111	109.8	109.3	87.8	95.1	86.9
C9K181	wzi	Uncharacterized protein wzi OS=Klebsiella pneumoniae GN=wzi PE=4 SV=1	44.4664	15	49	1	506	55.84	5.72	59.2	58	60.6	147	130.3	145
W1H0W7		Exoribonuclease 2 OS=Klebsiella pneumoniae ISC21 PE=3 SV=1	60.4167	17	29	1	384	43.224	5.96	134.7	93.4	91.8	88.4	101.3	90.5
A0A2G8AFC4	C630_20400	Phenolic acid decarboxylase OS=Klebsiella pneumoniae subsp. pneumoniae KpO3210 GN=C630_20400 PE=4 SV=1	93.4132	12	28	12	167	19.059	5.06	103.4	109.6	109.9	93.7	93.2	90.1
A0A0E1CLM3	KPNJ1_05377	Transcriptional regulatory protein cpxR OS=Klebsiella pneumoniae 30660/NJST258_1 GN=KPNJ1_05377 PE=4 SV=1	56.8966	14	59	2	232	26.256	5.66	101.4	91.6	91.7	101.2	118	96.1
A0A2A5IJP9	CI704_08230	2,3-dehydroadipyl-CoA hydratase OS=Klebsiella pneumoniae subsp. pneumoniae GN=CI704_08230 PE=3 SV=1	54.1176	12	36	2	255	27.246	6.9	144.3	140.4	137.4	54.9	65.5	57.6
A0A0E1CB78	nuoI	NADH-quinone oxidoreductase subunit I OS=Klebsiella pneumoniae 30660/NJST258_1 GN=nuoI PE=3 SV=1	76.9231	14	48	14	182	20.664	5.47	96.4	96.7	95.7	103.9	104.5	102.8
A0A060VSV8	KpST82_2679	Uncharacterized protein OS=Klebsiella pneumoniae GN=KpST82_2679 PE=4 SV=1	24.1135	15	28	15	846	98.369	8.79	104.5	106	103.1	93.8	99.3	93.4
W1EGG2		Non-heme chloroperoxidase OS=Klebsiella pneumoniae IS53 PE=4 SV=1	91.25	6	43	1	80	8.959	6.28	94.5	91.7	88.1	102.2	118.9	104.6
A0A0J4LLK9	SM87_00445	4-hydroxyphenylacetate degradation bifunctional isomerase/decarboxylase OS=Klebsiella pneumoniae GN=SM87_00445 PE=4 SV=1	47.2441	10	28	1	254	28.616	4.89	145	146.6	148	53	57	50.3
A0A0E1CJD7	panB	3-methyl-2-oxobutanoate hydroxymethyltransferase OS=Klebsiella pneumoniae 30660/NJST258_1 GN=panB PE=3 SV=1	89.3536	11	29	11	263	28.009	6.15	100.8	105.8	105.2	97.9	94.3	96.1
A0A2G3S1Y9	CS332_02005	Serine--tRNA ligase OS=Klebsiella pneumoniae subsp. pneumoniae GN=CS332_02005 PE=4 SV=1	37.907	13	47	1	430	48.519	5.58	102.6	105	93.2	97.1	110.6	91.5
W1BEF0	adk	Adenylate kinase OS=Klebsiella pneumoniae IS22 GN=adk PE=3 SV=1	49.5726	11	42	1	234	25.783	6.58	75.9	98.4	102.1	123.1	97.6	103
A0A060VJT7	dxs	1-deoxy-D-xylulose-5-phosphate synthase OS=Klebsiella pneumoniae GN=dxs PE=3 SV=1	40.8065	18	33	18	620	67.304	6.58	104.9	98.8	96.6	97.4	103.1	99.1
A0A181W7B7	hemE	Uroporphyrinogen decarboxylase OS=Klebsiella pneumoniae GN=hemE PE=3 SV=1	48.5876	11	25	1	354	39.184	6.19	112	99	109.9	80.3	92.6	106.1
A0A060VEB0	KpST82_3761	Uncharacterized protein OS=Klebsiella pneumoniae GN=KpST82_3761 PE=4 SV=1	56.6667	14	28	14	300	35.35	9.69	109.1	102.7	103.9	92.4	98.4	93.5
A0A0J4X4Z7	SM87_05351	Glycerophosphoryl diester phosphodiesterase OS=Klebsiella pneumoniae GN=SM87_05351 PE=4 SV=1	51.4045	16	41	2	356	40.295	6.6	115.2	110.8	100.3	97	102.7	74
A0A1E3F4X8	rpmE	50S ribosomal protein L31 OS=Klebsiella pneumoniae GN=rpmE PE=3 SV=1	72.8571	6	33	6	70	7.689	9.36	109	105.1	103.7	98.8	91.8	91.6
V0ATU4	HMPREF1619_03226	Glycerol dehydratase, large subunit OS=Klebsiella pneumoniae 909957 GN=HMPREF1619_03226 PE=3 SV=1	49.8195	17	32	17	554	60.286	5.03	130.3	128.6	126.2	70.2	73.7	71
A0A0C7K9B0	PMK1_03803	Uncharacterized protein OS=Klebsiella pneumoniae GN=PMK1_03803 PE=4 SV=1	85.3881	12	32	1	219	24.092	5.4	144.1	150.8	147.8	55.2	58.1	43.9
A0A2A5IE25	CI704_16995	2-hydroxyhepta-2,4-diene-1,7-dioate isomerase OS=Klebsiella pneumoniae subsp. pneumoniae GN=CI704_16995 PE=4 SV=1	47.2441	10	28	1	254	28.598	5.01	46.7	38.3	35.1	156.6	159.9	163.3
A0A0J4Y3L6	pdxA	4-hydroxythreonine-4-phosphate dehydrogenase OS=Klebsiella pneumoniae GN=pdxA PE=3 SV=1	65.3495	14	24	14	329	35.066	5.47	100.4	102	101.3	97.2	99.3	99.8
A0A2G8AA51	C630_26705	3-hydroxyacyl-[acyl-carrier-protein] dehydratase FabZ OS=Klebsiella pneumoniae subsp. pneumoniae KpO3210 GN=C630_26705 PE=4 SV=1	63.5762	11	40	3	151	17.014	6.93	102.3	99.1	96.6	102.2	101.1	98.8
A0A1Y0PSW4	dnaA	Chromosomal replication initiator protein DnaA OS=Klebsiella pneumoniae subsp. pneumoniae GN=dnaA PE=3 SV=1	54.6039	20	42	20	467	52.334	8.65	91.3	87	87.3	109.1	112.2	113.1
W1BH77		Universal stress protein G OS=Klebsiella pneumoniae IS22 PE=3 SV=1	23.9437	2	15	1	142	15.925	6.52	99.1	87	86.3	98.7	119.1	109.8
A0A0H3GYI0	KPHS_45530	TonB-system energizer ExbB OS=Klebsiella pneumoniae subsp. pneumoniae (strain HS11286) GN=KPHS_45530 PE=3 SV=1	30.0412	5	17	5	243	26.009	9.48	125.8	128.3	130.4	70.8	76.8	68
A0A169G8X3	fdhE	Protein FdhE homolog OS=Klebsiella pneumoniae GN=fdhE PE=3 SV=1	53.7217	12	26	12	309	34.575	5.67	94.9	97.8	98.1	104.6	101.2	103.4
A0A2A2SP89	rcsD	Phosphotransferase RcsD OS=Klebsiella pneumoniae GN=rcsD PE=3 SV=1	25.4237	17	24	17	885	98.686	5.4	93.8	90.2	94.6	105.8	107.8	107.9
A0A2D3D0T7	KPH11_22260	DNA topoisomerase IV subunit B OS=Klebsiella pneumoniae subsp. pneumoniae GN=KPH11_22260 PE=4 SV=1	31.0618	14	30	6	631	70.131	5.66	99.5	95	96.2	103.7	105.2	100.4
A0A1W1KDE9	SAMEA4362597_02593	Adenylate cyclase OS=Klebsiella pneumoniae GN=SAMEA4362597_02593 PE=4 SV=1	62.7315	21	44	1	432	48.185	5.92	128.5	98.8	111.1	86.3	91.1	84.2
A0A0W8AVY0	ftsA	Cell division protein FtsA OS=Klebsiella pneumoniae GN=ftsA PE=3 SV=1	69.5238	19	37	4	420	45.285	6.13	99.9	104.3	99.5	93.3	107.5	95.5
A0A060VKQ6	KpST82_2697	Uncharacterized protein OS=Klebsiella pneumoniae GN=KpST82_2697 PE=4 SV=1	50.6527	15	31	15	383	41.062	7.06	109.4	107.3	106.9	93	91	92.4
W1HTS4	ubiG	Ubiquinone biosynthesis O-methyltransferase OS=Klebsiella pneumoniae IS39 GN=ubiG PE=3 SV=1	81.07	13	30	1	243	26.761	6.9	91.4	98.9	92.6	97.5	108.6	111
R4YIE9	KPR_5021	Uncharacterized protein OS=Klebsiella pneumoniae subsp. rhinoscleromatis SB3432 GN=KPR_5021 PE=4 SV=1	16.3955	17	23	8	1598	171.228	5.34	107.7	104.9	106.9	94.9	93.8	91.7
A0A1C3QQK8	pyrE	Orotate phosphoribosyltransferase OS=Klebsiella pneumoniae GN=pyrE PE=3 SV=1	72.77	12	26	1	213	23.633	5.68	34.7	35.6	36	173	158.6	162.1
A0A2G3RZM4	CS332_06630	Nucleoside-diphosphate kinase OS=Klebsiella pneumoniae subsp. pneumoniae GN=CS332_06630 PE=4 SV=1	48.2517	5	31	1	143	15.519	5.81	92.9	90.6	113.1	94.1	101.6	107.7
A0A1W1RHJ9	ssb	Single-stranded DNA-binding protein OS=Klebsiella pneumoniae GN=ssb PE=3 SV=1	57.4713	12	38	12	174	18.728	5.58	101.7	99.9	100.7	98.4	101.4	97.9
W1ES66		DNA-binding protein H-NS OS=Klebsiella pneumoniae IS53 PE=4 SV=1	73.6111	6	41	1	72	7.81	8.44	75	73.4	76.8	132.3	115.5	127
A0A1S9BPZ5	BU230_04090	Heat-shock protein OS=Klebsiella pneumoniae GN=BU230_04090 PE=3 SV=1	54.7771	6	20	1	157	17.453	6.09	117.4	121.4	111.9	82.9	94.8	71.6
A0A098C9D4	ghrA	Glyoxylate/hydroxypyruvate reductase A OS=Klebsiella pneumoniae GN=ghrA PE=3 SV=1	60.5769	13	34	1	312	35.203	6.44	81.6	78.3	76.5	119	126.4	118.2
W8UM12	KPNJ2_04169	Thioredoxin OS=Klebsiella pneumoniae 30684/NJST258_2 GN=KPNJ2_04169 PE=4 SV=1	66.0839	12	35	1	286	31.982	4.68	86.2	93.3	90.1	110.1	105	115.3
A0A0C7KC58	hisD	Histidinol dehydrogenase OS=Klebsiella pneumoniae GN=hisD PE=3 SV=1	37.3272	11	17	1	434	45.597	5.02	109.3	123	119.6	81	86.8	80.2
A0A181YZY6	yceH	UPF0502 protein SAMEA3531778_02966 OS=Klebsiella pneumoniae GN=yceH PE=3 SV=1	68.2028	12	36	1	217	24.328	5.26	59.8	54.5	54.3	147.2	151.8	132.5
W1H4X8	minE	Cell division topological specificity factor OS=Klebsiella pneumoniae ISC21 GN=minE PE=3 SV=1	94.382	11	48	11	89	10.303	5.24	91.9	91.3	91.8	108.5	105.5	111
A0A0E1CBA7	rph	Ribonuclease PH OS=Klebsiella pneumoniae 30660/NJST258_1 GN=rph PE=3 SV=1	51.7928	8	19	8	251	26.859	6.55	99.4	101	100.2	99.3	99	101.1
R4YFA7	KPR_2101	Probable phosphatase KPR_2101 OS=Klebsiella pneumoniae subsp. rhinoscleromatis SB3432 GN=KPR_2101 PE=3 SV=1	78.4553	15	39	2	246	27.056	5.97	85	89.6	88.3	113.2	108.4	115.5
A6T4Z9	rcsF	Outer membrane lipoprotein RcsF OS=Klebsiella pneumoniae subsp. pneumoniae (strain ATCC 700721 / MGH 78578) GN=rcsF PE=3 SV=1	71.1111	7	21	7	135	14.307	9.22	103	99.7	100.6	99	98.9	98.8
R4Y6D5	rpsP	30S ribosomal protein S16 OS=Klebsiella pneumoniae subsp. rhinoscleromatis SB3432 GN=rpsP PE=3 SV=1	47.0588	5	53	5	102	11.281	10.45	97.7	96.3	96.5	97.6	110.8	101.1
A0A1W1LEX3	SAMEA4362626_03270	Adenylate cyclase OS=Klebsiella pneumoniae GN=SAMEA4362626_03270 PE=4 SV=1	61.3426	20	40	1	432	48.278	6.02	132.6	171.9	131.8	47	62.6	54.1
A0A2G3RXI6	fabZ	Beta-hydroxyacyl-ACP dehydratase OS=Klebsiella pneumoniae subsp. pneumoniae GN=fabZ PE=4 SV=1	58.2781	10	42	2	151	17.031	7.46	95.5	104.4	104.2	101.2	95.8	98.8
W8VD20	arnB	UDP-4-amino-4-deoxy-L-arabinose--oxoglutarate aminotransferase OS=Klebsiella pneumoniae 30684/NJST258_2 GN=arnB PE=3 SV=1	43.299	12	20	12	388	42.348	6.87	92.1	93.1	92.3	105.4	112	105.2
R4YDZ0	ybaK	Cys-tRNA(Pro)/Cys-tRNA(Cys) deacylase OS=Klebsiella pneumoniae subsp. rhinoscleromatis SB3432 GN=ybaK PE=3 SV=1	78.1818	10	24	10	165	17.868	9.28	81.8	82.9	84.7	118.8	113.5	118.3
A0A263JYJ9	CS372_15225	Tellurium resistance protein TerF OS=Klebsiella pneumoniae GN=CS372_15225 PE=4 SV=1	66.8281	17	33	17	413	45.308	5.62	106.6	108.7	110.8	90.4	92	91.4
B5RKD1	KPK_A0215	Uncharacterized protein OS=Klebsiella pneumoniae (strain 342) GN=KPK_A0215 PE=4 SV=1	41.5945	19	32	2	577	63.42	4.91	75.1	86.1	84.4	96.7	183.5	74.3
A0A0E1CBU8	KPNJ1_01921	Uncharacterized protein OS=Klebsiella pneumoniae 30660/NJST258_1 GN=KPNJ1_01921 PE=4 SV=1	62.1302	10	30	1	169	18.89	9.35	48.5	53.9	53.1	152.8	148.6	143.1
A0A0E1GWC0	lpxA	Acyl-[acyl-carrier-protein]--UDP-N-acetylglucosamine O-acyltransferase OS=Klebsiella pneumoniae GN=lpxA PE=3 SV=1	40.8397	9	34	1	262	28.092	6.95	102.6	104.8	104.2	101.2	92.1	95
J2X024	UUU_03160	Plasmid-partitioning protein OS=Klebsiella pneumoniae subsp. pneumoniae DSM 30104 GN=UUU_03160 PE=3 SV=1	71.2074	19	37	3	323	35.36	6.71	129.6	130.8	133.3	68.4	69.9	68.1
W8URD5	KPNJ2_01398	23S rRNA Gm2251 methyltransferase OS=Klebsiella pneumoniae 30684/NJST258_2 GN=KPNJ2_01398 PE=3 SV=1	58.5635	19	44	19	362	39.7	8.4	103.5	104	102.6	96	99	94.9
A0A0E1CFY4	mnmA	tRNA-specific 2-thiouridylase MnmA OS=Klebsiella pneumoniae 30660/NJST258_1 GN=mnmA PE=3 SV=1	61.8557	16	29	16	388	43.158	5.07	100	102.1	102.7	97.2	96.7	101.4
A0A0C7KJX3	map_1	Methionine aminopeptidase OS=Klebsiella pneumoniae GN=map_1 PE=3 SV=1	82.197	15	44	2	264	29.204	5.82	95.8	104.5	104.6	93.7	99.8	101.6
W1GY82		COG3118: Thioredoxin domain-containing protein EC-YbbN OS=Klebsiella pneumoniae ISC21 PE=4 SV=1	66.5493	12	42	1	284	31.753	4.72	81.2	94.4	91.1	109.1	98.1	126
A0A0C7KJF2	helD	DNA helicase OS=Klebsiella pneumoniae GN=helD PE=3 SV=1	37.4269	19	27	3	684	77.541	8.22	101.6	106.3	102	104.6	98.6	86.9
W9BAZ1	B1727_20600	Oxidoreductase OS=Klebsiella pneumoniae GN=B1727_20600 PE=4 SV=1	64.8485	10	30	1	165	18.472	9.23	140	144.6	152.2	54.5	62.2	46.5
A0A1W1K7W1	lolB	Outer-membrane lipoprotein LolB OS=Klebsiella pneumoniae GN=lolB PE=3 SV=1	69.4581	10	29	8	203	23.005	8.97	100.2	99.7	100.8	99.6	100.8	98.9
A0A2G4PUI8	CS372_21310	Universal stress protein UspF OS=Klebsiella pneumoniae GN=CS372_21310 PE=4 SV=1	70.1389	9	62	2	144	16.016	5.52	89.3	85.2	85.7	114.3	110.4	115
A0A2D2F3L2	CTI52_24085	NAD(P)-dependent oxidoreductase OS=Klebsiella pneumoniae GN=CTI52_24085 PE=4 SV=1	61.7021	11	28	1	282	29.125	5.29	90.9	92.5	97.7	98.5	102.5	118
W1BIX8		NADPH:quinone oxidoreductase 2 OS=Klebsiella pneumoniae IS22 PE=4 SV=1	61.7021	11	27	1	282	29.185	5.29	128.4	115.2	111.6	73.3	94.4	77
A0A2G3RXF5	purH	Bifunctional phosphoribosylaminoimidazolecarboxamide formyltransferase/IMP cyclohydrolase OS=Klebsiella pneumoniae subsp. pneumoniae GN=purH PE=4 SV=1	41.7769	17	35	1	529	57.182	5.78	114.6	110.4	114.5	90.3	90.7	79.6
A0A0J4XAQ0	hslV	ATP-dependent protease subunit HslV OS=Klebsiella pneumoniae GN=hslV PE=3 SV=1	54.5455	8	39	8	176	18.974	6.39	100.6	99.9	102	97.4	101.7	98.4
A0A1C3Q466	proB	Glutamate 5-kinase OS=Klebsiella pneumoniae GN=proB PE=3 SV=1	65.1226	15	30	15	367	39.093	6.7	102.6	100.8	98.5	99.4	101.4	97.3
A0A1C3SZY8	wza	Polysaccharide biosynthesis/export protein OS=Klebsiella pneumoniae GN=wza PE=4 SV=1	41.4248	10	32	1	379	41.725	6.58	80.3	94.9	93.5	102.7	128.6	100.1
W1E7I4		Histidine kinase OS=Klebsiella pneumoniae IS46 PE=4 SV=1	25.7389	18	38	18	812	91.04	6.79	99.4	99.1	97.7	104.5	101.6	97.7
A0A2G8AMW0	C630_04770	Bifunctional glyoxylate/hydroxypyruvate reductase A OS=Klebsiella pneumoniae subsp. pneumoniae KpO3210 GN=C630_04770 PE=4 SV=1	60.5769	13	35	1	312	35.147	6.44	80.6	90.3	86.4	108	119.7	115.1
A0A0C7K7Q0	ptrA_1	Protease 3 OS=Klebsiella pneumoniae GN=ptrA_1 PE=3 SV=1	42.9761	27	36	27	961	107.36	6.2	104.5	103.2	103.7	94.5	100.3	93.8
A0A1Y0PW97	B5K12_09460	Tyrosine-protein kinase OS=Klebsiella pneumoniae subsp. pneumoniae GN=B5K12_09460 PE=4 SV=1	33.1939	16	29	16	717	79.659	6.13	131.9	133.6	136.5	65	68.8	64.2
A0A0E1CRB7	KPNJ1_05445	Transcriptional regulator, GntR family protein OS=Klebsiella pneumoniae 30660/NJST258_1 GN=KPNJ1_05445 PE=4 SV=1	34.7639	6	17	6	233	26.289	6.27	105.9	101.4	101.5	96.5	95.8	99
A6TDS4	serA	D-3-phosphoglycerate dehydrogenase OS=Klebsiella pneumoniae subsp. pneumoniae (strain ATCC 700721 / MGH 78578) GN=serA PE=3 SV=1	33.1707	11	29	11	410	43.963	6.52	105.7	106.3	106.6	92.1	94.3	94.9
A0A2G3S271	CS332_02450	Amino acid ABC transporter substrate-binding protein OS=Klebsiella pneumoniae subsp. pneumoniae GN=CS332_02450 PE=4 SV=1	39.5161	14	53	2	248	27.173	8.51	97.8	73.9	76.5	91.9	164.2	95.8
A0A2G9LH86	CKQ90_07190	Xanthine phosphoribosyltransferase OS=Klebsiella pneumoniae GN=CKQ90_07190 PE=4 SV=1	53.2895	7	25	7	152	16.912	5.85	98.6	98	99.1	103.3	100.4	100.6
H6U1V5		TerY3 OS=Klebsiella pneumoniae PE=4 SV=1	38.3754	12	24	12	357	39.346	5.38	112.4	111.2	111	81.5	96.2	87.6
W1AWU0		YciO family OS=Klebsiella pneumoniae IS22 PE=3 SV=1	60.1942	9	32	9	206	23.094	5.97	99.7	103.9	103.2	96.8	101.3	95.2
A0A1S0W508	hpaC	4-hydroxyphenylacetate 3-monooxygenase reductase component OS=Klebsiella pneumoniae GN=hpaC PE=4 SV=1	75.2941	8	18	8	170	18.408	6.67	82.5	85.7	88.6	114.4	114.3	114.7
A0A098CGI6	AGG09_10620	Glucosamine--fructose-6-phosphate aminotransferase OS=Klebsiella pneumoniae GN=AGG09_10620 PE=4 SV=1	41.0765	12	26	1	353	39.124	6.54	105.5	104.9	105.4	101.3	94.5	88.3
A0A170ECU5	pssA	CDP-diacylglycerol--serine O-phosphatidyltransferase OS=Klebsiella pneumoniae GN=pssA PE=4 SV=1	47.8936	17	40	2	451	52.605	9.19	109.8	95.5	91.8	102.8	104.7	95.4
A6TCK2	rluD	Pseudouridine synthase OS=Klebsiella pneumoniae subsp. pneumoniae (strain ATCC 700721 / MGH 78578) GN=rluD PE=3 SV=1	60.1227	12	27	12	326	37.078	6.81	102.8	104.3	104.4	92.1	104.8	91.6
W1GFB4		Putative oxidoreductase OS=Klebsiella pneumoniae ISC21 PE=4 SV=1	74.2029	21	43	2	345	38.906	6.32	98.9	96.3	94.1	99.2	114.1	97.4
A0A0H3H2B7	KPHS_43010	Fused phosphoenolpyruvate-protein phosphotransferase PtsP/GAF domain protein OS=Klebsiella pneumoniae subsp. pneumoniae (strain HS11286) GN=KPHS_43010 PE=3 SV=1	30.2139	15	26	15	748	83.452	5.66	100.8	102.2	102.1	94.2	104.5	96.3
A0A1B2ZL43	BCB67_23630	TIGR00156 family protein OS=Klebsiella pneumoniae GN=BCB67_23630 PE=4 SV=1	71.6418	12	57	6	134	14.673	8.7	116.6	121.7	122.1	79.8	82.6	77.3
W1B024		Cystine ABC transporter, periplasmic cystine-binding protein FliY OS=Klebsiella pneumoniae IS22 PE=3 SV=1	35.7895	13	52	2	285	31.047	6.64	118.1	97	96.2	86.8	103	99
A0A193SES2	wza	Polysaccharide export protein Wza OS=Klebsiella pneumoniae GN=wza PE=4 SV=1	39.1534	9	30	1	378	41.578	6.58	81	84.9	81.4	120.4	127.1	105.1
A0A2A5IJ82	CI704_09315	30S ribosomal protein S12 methylthiotransferase accessory factor YcaO OS=Klebsiella pneumoniae subsp. pneumoniae GN=CI704_09315 PE=4 SV=1	43.686	15	22	10	586	65.341	4.58	86.5	87.6	86.3	109.3	117.2	113.1
A0A0E1CM20	KPNJ1_05368	Transcriptional repressor cytR OS=Klebsiella pneumoniae 30660/NJST258_1 GN=KPNJ1_05368 PE=4 SV=1	61.4035	16	30	16	342	37.711	6.79	99.6	96.7	97.7	99.5	106.6	99.9
W8UKW9	uvrB	UvrABC system protein B OS=Klebsiella pneumoniae 30684/NJST258_2 GN=uvrB PE=3 SV=1	53.5608	26	38	1	674	76.118	5.3	100.5	112.5	108	99.6	101.3	78.1
A0A2G3S2U9	CS332_00115	50S ribosomal protein L15 OS=Klebsiella pneumoniae subsp. pneumoniae GN=CS332_00115 PE=4 SV=1	39.5833	7	39	1	144	14.957	11.18	148.1	109.9	100.3	94.4	79.7	67.6
A0A060VP02	sppA	Protease 4 OS=Klebsiella pneumoniae GN=sppA PE=3 SV=1	34.3598	15	27	15	617	66.765	6.83	90.8	92.6	92.7	108	109.8	106.1
V0AGU9	HMPREF1619_05333	Probable phosphatase HMPREF1619_05333 OS=Klebsiella pneumoniae 909957 GN=HMPREF1619_05333 PE=3 SV=1	78.7755	15	38	2	245	26.91	5.97	127	123.1	117.1	74	95	63.8
A0A0S3FI61	ubiG	Ubiquinone biosynthesis O-methyltransferase OS=Klebsiella pneumoniae GN=ubiG PE=3 SV=1	81.405	13	29	1	242	26.692	6.46	94.4	99.8	104.4	99.9	105.1	96.4
A0A1W6ALA0	blaTEM	Beta-lactamase (Fragment) OS=Klebsiella pneumoniae GN=blaTEM PE=3 SV=1	78.3394	18	37	18	277	30.268	5.69	55.2	51.4	53.5	147.8	144.2	147.9
B5Y2J9	blc_1	Outer membrane lipoprotein Blc OS=Klebsiella pneumoniae (strain 342) GN=blc_1 PE=4 SV=1	59.322	10	28	1	177	19.836	9.41	133.8	132.4	135.5	60.6	70.2	67.5
W8VID3	KPNJ2_05164	Maltose operon periplasmic protein OS=Klebsiella pneumoniae 30684/NJST258_2 GN=KPNJ2_05164 PE=4 SV=1	52.8662	11	36	11	314	32.84	9.36	92.2	89.1	89.9	108	115.6	105.2
A0A164L059	rlmL	Ribosomal RNA large subunit methyltransferase K/L OS=Klebsiella pneumoniae GN=rlmL PE=3 SV=1	47.2183	28	39	1	701	78.831	8.63	106.9	99.9	97.4	99.9	104.8	91.2
A0A2G4Y7P4	CQB04_23900	Hydrolase OS=Klebsiella pneumoniae GN=CQB04_23900 PE=4 SV=1	62.5954	12	22	12	262	28.427	7.09	104.8	106.9	104.7	89.9	97.7	96.1
A0A170AD29	fepA_2	TonB-dependent receptor OS=Klebsiella pneumoniae GN=fepA_2 PE=3 SV=1	31.6712	14	32	14	742	82.288	5.69	104.2	105.8	109.5	92.9	97.7	89.9
A0A169LJW9	macA_1	Membrane anchor protein YbhG OS=Klebsiella pneumoniae GN=macA_1 PE=4 SV=1	54.3807	13	29	13	331	36.022	7.06	100.1	99.6	100.3	100.4	100.9	98.6
A0A0H3GXM8	KPHS_27010	Putative ABC-type spermidine/putrescine transport protein OS=Klebsiella pneumoniae subsp. pneumoniae (strain HS11286) GN=KPHS_27010 PE=4 SV=1	55.7377	11	28	7	366	40.851	6.3	107.6	96.4	94.7	98.9	102.1	100.2
A0A231WVQ3	B1727_05995	3-oxoacyl-[acyl-carrier-protein] reductase FabG OS=Klebsiella pneumoniae GN=B1727_05995 PE=4 SV=1	59.1093	10	22	1	247	25.095	5.4	105.1	114.2	109.8	89.5	89.5	91.8
A0A1Y0PZ13	B5K12_09450	Polysaccharide export protein Wza OS=Klebsiella pneumoniae subsp. pneumoniae GN=B5K12_09450 PE=4 SV=1	51.7241	12	28	4	377	41.326	7.47	119.5	123.8	120.5	71.8	93	71.4
A0A1Y0Q2H7	hemH	Ferrochelatase OS=Klebsiella pneumoniae subsp. pneumoniae GN=hemH PE=3 SV=1	54.375	13	26	1	320	35.75	7.21	115	104.5	106.5	87.4	101.4	85.2
B5XSX5	rbfA	Ribosome-binding factor A OS=Klebsiella pneumoniae (strain 342) GN=rbfA PE=3 SV=1	69.1729	8	28	8	133	15.087	7.25	96	97.4	96.2	104.2	103.9	102.3
A0A2A2SXG7	pyrE	Orotate phosphoribosyltransferase OS=Klebsiella pneumoniae GN=pyrE PE=3 SV=1	72.77	11	22	2	213	23.591	5.91	110.9	111.5	106.4	82.4	115.2	73.7
A0A0E1CBS4	hisD	Histidinol dehydrogenase OS=Klebsiella pneumoniae 30660/NJST258_1 GN=hisD PE=3 SV=1	37.3272	11	17	1	434	45.598	4.96	113.1	110.1	104	86.5	100.9	85.4
A0A1C3Q4G2	hemB	Delta-aminolevulinic acid dehydratase OS=Klebsiella pneumoniae GN=hemB PE=3 SV=1	56.4815	11	22	11	324	35.419	5.27	94.9	90	91	106.3	107	110.7
A0A1B3A8F2	BCB67_14110	Phosphatase 2C family protein OS=Klebsiella pneumoniae GN=BCB67_14110 PE=4 SV=1	39.688	18	31	2	577	63.122	4.84	160.6	139.5	134.4	48.9	70.9	45.7
C8SYJ3	mglA	Galactose/methyl galactoside import ATP-binding protein MglA OS=Klebsiella pneumoniae subsp. rhinoscleromatis ATCC 13884 GN=mglA PE=3 SV=1	51.3834	21	32	8	506	56.595	7.15	99.4	99.7	99.7	99.7	102.4	99.2
A0A0A8IKC4	yjeF	Multifunctional fusion protein OS=Klebsiella pneumoniae GN=yjeF PE=3 SV=1	45.2756	16	33	16	508	53.315	6.49	93.1	91.8	91.7	105.6	111	106.8
Q6U646	terB	Tellurium resistance protein TerB OS=Klebsiella pneumoniae GN=terB PE=1 SV=1	61.4035	10	31	10	171	18.792	5.33	122.2	129.6	126.6	75.6	74.5	71.5
A0A2A5IA08	artP	Amino acid ABC transporter ATP-binding protein OS=Klebsiella pneumoniae subsp. pneumoniae GN=artP PE=4 SV=1	45.2282	12	50	12	241	26.543	7.53	108.9	110.7	110.4	92.8	87.7	89.5
A0A1E3FBV9	cysN	Sulfate adenylyltransferase subunit 1 OS=Klebsiella pneumoniae GN=cysN PE=3 SV=1	40	16	28	1	475	52.414	5.2	91.4	89.6	86.1	111.6	108.4	112.9
A0A2G3RW85	CS332_16605	Signal recognition particle-docking protein FtsY OS=Klebsiella pneumoniae subsp. pneumoniae GN=CS332_16605 PE=4 SV=1	30.5051	12	26	1	495	54.381	4.55	90.8	111.3	109.8	91.5	87.9	108.6
A0A1S8Y520	BU230_39870	ABC transporter substrate-binding protein OS=Klebsiella pneumoniae GN=BU230_39870 PE=4 SV=1	45.5939	14	32	3	522	56.81	7.72	112.7	105.8	111.7	88.9	92.7	88.2
A0A0E1CCL7	ftsP	Cell division protein FtsP OS=Klebsiella pneumoniae 30660/NJST258_1 GN=ftsP PE=3 SV=1	58.3682	20	29	20	478	52.723	7.53	103.7	93.5	94.4	98	110.5	99.8
W1B798	tpx	Thiol peroxidase OS=Klebsiella pneumoniae IS22 GN=tpx PE=3 SV=1	32.1429	4	19	2	168	17.824	4.92	99.9	109.9	109	91.7	91.1	98.3
W9BDX7	bolA	BolA protein OS=Klebsiella pneumoniae GN=bolA PE=3 SV=1	64.9573	5	26	5	117	13.453	8.51	101.6	105.3	106.8	95.2	91.8	99.2
A0A1C3QSF9	murD	UDP-N-acetylmuramoylalanine--D-glutamate ligase OS=Klebsiella pneumoniae GN=murD PE=3 SV=1	45.8904	13	27	1	438	46.817	5.41	105.1	81.6	89.6	101.2	115.9	106.5
A0A2G3RXY8	CS332_07150	Cell division protein FtsA OS=Klebsiella pneumoniae subsp. pneumoniae GN=CS332_07150 PE=4 SV=1	55.9524	16	31	1	420	45.258	6.13	106	81.5	75.1	101.9	111.3	124.2
A0A1W1JE21	glmS_2	Glucosamine--fructose-6-phosphate aminotransferase OS=Klebsiella pneumoniae GN=glmS_2 PE=4 SV=1	41.0765	12	25	1	353	39.125	6.39	95.6	94.5	100.5	98.1	110.2	101.2
V0AZH6	HMPREF1619_01213	Putative N,N'-diacetylchitobiose-specific phosphotransferase enzyme IIA component OS=Klebsiella pneumoniae 909957 GN=HMPREF1619_01213 PE=4 SV=1	90.4762	5	18	1	105	11.531	5.38	101.7	102.5	108.2	99.4	92.3	95.8
A0A2A5ICW7	CI704_19915	NADH-quinone oxidoreductase subunit NuoE OS=Klebsiella pneumoniae subsp. pneumoniae GN=CI704_19915 PE=4 SV=1	70.4819	9	40	1	166	18.577	5.5	94.7	90.7	93.4	110.6	109.5	101
A0A060VLV8	ntrC	NtrC protein OS=Klebsiella pneumoniae GN=ntrC PE=4 SV=1	41.189	15	20	15	471	52.581	6.49	99.8	101.9	102.9	96	102.9	96.5
A0A0W8ADZ1	fabG2	3-oxoacyl-ACP reductase OS=Klebsiella pneumoniae GN=fabG2 PE=4 SV=1	79.918	13	20	2	244	25.572	6.57	102.2	107.1	106.9	100.1	96.2	87.5
A0A2D2EBL7	CTI52_01650	Oxidoreductase OS=Klebsiella pneumoniae GN=CTI52_01650 PE=4 SV=1	74.2029	21	43	2	345	38.904	6.32	139.9	140.4	157.1	44.6	64.9	53.1
B5XQ24	prtB	Oligopeptidase B OS=Klebsiella pneumoniae (strain 342) GN=prtB PE=4 SV=1	34.9854	16	30	1	686	78.706	5.52	160.8	101	93.3	75	92.6	77.3
B5XZM5	atpC	ATP synthase epsilon chain OS=Klebsiella pneumoniae (strain 342) GN=atpC PE=3 SV=1	76.259	5	37	1	139	15.04	6.28	97	103.6	93.7	91.5	109.4	104.8
A0A0E1CH13	lolA	Outer-membrane lipoprotein carrier protein OS=Klebsiella pneumoniae 30660/NJST258_1 GN=lolA PE=3 SV=1	76.8473	13	40	13	203	22.544	7.43	90.1	91.5	90.5	108.8	105	114.1
W8VDS1	KPNJ2_00691	2,4-dienoyl-coa reductase [nadph] OS=Klebsiella pneumoniae 30684/NJST258_2 GN=KPNJ2_00691 PE=4 SV=1	50.3693	23	28	21	677	72.608	6.67	103.3	102.1	102.6	96.2	101.4	94.3
A0A0H3GXB2	KPHS_51150	Putative phosphatase OS=Klebsiella pneumoniae subsp. pneumoniae (strain HS11286) GN=KPHS_51150 PE=4 SV=1	53.1469	6	23	6	143	15.576	9.52	100.6	100.2	99	99.3	101.5	99.4
A0A2A5IIU4	rlmL	Ribosomal RNA large subunit methyltransferase K/L OS=Klebsiella pneumoniae subsp. pneumoniae GN=rlmL PE=3 SV=1	47.2183	28	38	1	701	78.847	8.63	121.1	98.8	98	89	104.3	88.8
A0A2G4YJV0	CQB04_02425	Uncharacterized protein OS=Klebsiella pneumoniae GN=CQB04_02425 PE=4 SV=1	41.5945	20	36	19	577	64.72	9.04	93.1	93.2	93	102.7	112.1	105.9
A0A1B2ZMK3	ribA	GTP cyclohydrolase-2 OS=Klebsiella pneumoniae GN=ribA PE=3 SV=1	66	12	29	12	200	22.154	5.99	95.5	96.3	96.6	106.7	98.9	106.1
A0A1V0C4M7	AM447_08355	2-hydroxyhepta-2,4-diene-1,7-dioate isomerase OS=Klebsiella pneumoniae GN=AM447_08355 PE=4 SV=1	84.7619	11	30	0	210	22.596	5.95
W1AUE1	rsmI	Ribosomal RNA small subunit methyltransferase I OS=Klebsiella pneumoniae IS22 GN=rsmI PE=3 SV=1	63.0662	12	20	1	287	31.544	6.13	33	29.7	35.8	160.5	172.5	168.5
A0A231WK93	B1727_25200	Beta-aspartyl-peptidase OS=Klebsiella pneumoniae GN=B1727_25200 PE=4 SV=1	59.4249	11	17	11	313	32.642	5.35	94.8	97.2	97.3	100.7	108.5	101.6
A0A1S0W808	SM57_03760	Altronate dehydratase OS=Klebsiella pneumoniae GN=SM57_03760 PE=4 SV=1	62.2222	18	33	18	495	54.044	5.97	90.9	87.9	87.7	109.1	115.2	109.2
A0A193SDR0	uge	Uridine diphosphate galacturonate 4-epimerase OS=Klebsiella pneumoniae GN=uge PE=4 SV=1	71.0448	15	41	11	335	38.022	6.01	156.6	163.7	161.2	37.2	43.2	38.1
W8V2G3	KPNJ2_03617	Arginine transport ATP-binding protein artP OS=Klebsiella pneumoniae 30684/NJST258_2 GN=KPNJ2_03617 PE=4 SV=1	43.1818	6	29	2	264	29.28	7.2	106.5	108.6	111.8	88.8	92.8	91.5
W1E170	rpmD	50S ribosomal protein L30 OS=Klebsiella pneumoniae IS46 GN=rpmD PE=3 SV=1	62.7119	6	32	6	59	6.51	10.96	99.2	100.6	100.7	100.1	96.3	103.1
J2LSZ1	UUU_17870	Uncharacterized protein OS=Klebsiella pneumoniae subsp. pneumoniae DSM 30104 GN=UUU_17870 PE=4 SV=1	49.3865	14	27	14	326	35.156	9.33	91.6	88.8	90.1	109.7	108.5	111.2
A0A2G4YE72	CQB04_14290	Ferrochelatase OS=Klebsiella pneumoniae GN=CQB04_14290 PE=4 SV=1	54.375	13	28	1	320	35.747	7.21	89	89.2	96.7	102.4	114.3	108.4
A0A060VKS8	yebT	YebT protein OS=Klebsiella pneumoniae GN=yebT PE=4 SV=1	40.7407	24	35	24	891	96.349	7.21	103.6	103.5	103.9	96.6	99.6	92.8
A0A060VDK3	mog	Mog protein OS=Klebsiella pneumoniae GN=mog PE=4 SV=1	70	12	30	12	200	21.792	5.25	94.8	96.1	95.6	102.8	108.8	101.8
A0A1S0W8P6	patA	Putrescine aminotransferase OS=Klebsiella pneumoniae GN=patA PE=3 SV=1	55.5556	21	34	1	459	49.472	6.3	126.3	138.1	151.1	63.3	58.7	62.4
A0A1Y0Q2D8	murD	UDP-N-acetylmuramoylalanine--D-glutamate ligase OS=Klebsiella pneumoniae subsp. pneumoniae GN=murD PE=3 SV=1	45.8904	13	25	1	438	46.922	5.41	122.5	116	121	83.3	87.4	69.8
J2DGH9	patA	Putrescine aminotransferase OS=Klebsiella pneumoniae subsp. pneumoniae DSM 30104 GN=patA PE=3 SV=1	54.4872	20	34	1	468	50.569	6.25	105	96.7	91.4	89.4	152.5	65
O87754	ompK37	OmpK37 porin OS=Klebsiella pneumoniae GN=ompK37 PE=4 SV=1	27.8075	7	100	1	374	41.587	4.81	102.1	99.3	99.7	113.3	77.1	108.4
A7M6Z1	wza	Putative capsule polysaccharide export protein OS=Klebsiella pneumoniae GN=wza PE=4 SV=1	42.328	9	25	1	378	41.642	6.28	113.7	106	99.7	98	90.7	91.8
A0A1S0WCI6	CTI63_15855	NAD(P)H-quinone oxidoreductase OS=Klebsiella pneumoniae GN=CTI63_15855 PE=4 SV=1	51.227	13	43	1	326	34.637	6.43	96.8	96.9	96.1	105.2	103.9	101.2
V0B1J2	HMPREF1619_03785	Replication-associated recombination protein A OS=Klebsiella pneumoniae 909957 GN=HMPREF1619_03785 PE=4 SV=1	64.4295	19	28	19	447	49.621	6.48	97.8	93.9	93.8	103.4	109.4	101.8
A0A1B3A0S5	BCB67_04200	Uncharacterized protein OS=Klebsiella pneumoniae GN=BCB67_04200 PE=4 SV=1	47.8754	13	24	1	353	38.334	8.85	108.6	115.3	108.9	86.9	96.1	84.2
W1B8H1		Cellulose synthase, putative OS=Klebsiella pneumoniae IS22 PE=4 SV=1	63.3745	10	21	10	243	26.924	5.16	87.1	86	85.4	109.7	115	116.8
A0A1E3FBC9	msbA	Lipid A export ATP-binding/permease protein MsbA OS=Klebsiella pneumoniae GN=msbA PE=3 SV=1	43.8144	18	33	18	582	64.47	7.97	110.4	106.9	106.6	91.2	93.6	91.3
A0A2G4PR61	CS372_26785	Cysteine ABC transporter substrate-binding protein OS=Klebsiella pneumoniae GN=CS372_26785 PE=4 SV=1	66.171	14	32	2	269	28.705	6.83	116.4	111.9	110.3	89.3	87.6	84.5
W1DYZ1	rpsM	30S ribosomal protein S13 OS=Klebsiella pneumoniae IS46 GN=rpsM PE=3 SV=1	51.6949	9	44	9	118	13.202	10.76	96.5	97	97.3	104	97.6	107.6
A0A1W1KL50	manX_2	PTS system mannose-specific transporter subunit IIB OS=Klebsiella pneumoniae GN=manX_2 PE=4 SV=1	46.1538	5	16	5	156	16.979	8.38	88	87.2	86.2	117.9	109.8	110.8
A0A263K5N8	BB785_06775	Iron-sulfur cluster assembly scaffold protein IscU OS=Klebsiella pneumoniae GN=BB785_06775 PE=3 SV=1	84.375	8	30	8	128	13.826	5.02	113.6	114.5	113.7	86.5	88.5	83.2
A0A1E3F684	BCB67_22965	Uncharacterized protein OS=Klebsiella pneumoniae GN=BCB67_22965 PE=4 SV=1	38.5542	6	12	6	249	27.363	5.19	87.4	83.6	86.7	107	125.1	110.1
A0A1Y0Q646	uvrB	UvrABC system protein B OS=Klebsiella pneumoniae subsp. pneumoniae GN=uvrB PE=3 SV=1	53.6404	26	37	1	673	76.015	5.3	148.3	123.6	125	59.6	81.9	61.6
A0A2D2EV82	CTI52_07905	NUDIX hydrolase OS=Klebsiella pneumoniae GN=CTI52_07905 PE=4 SV=1	77.5956	7	22	4	183	20.686	4.63	99.9	95.7	97.9	103.1	101.8	101.7
A0A210V1U1	uvrC	UvrABC system protein C OS=Klebsiella pneumoniae GN=uvrC PE=3 SV=1	43.6066	19	31	19	610	67.956	9.09	99.6	97.7	96.9	99.9	102.5	103.3
H6U1V4	AM447_28780	Phosphatase 2C family protein OS=Klebsiella pneumoniae GN=AM447_28780 PE=4 SV=1	37.435	17	30	1	577	63.167	4.89	103.7	89.8	94.2	103.2	103.8	105.1
A0A2G3RV91	CS332_13940	D-lactate dehydrogenase OS=Klebsiella pneumoniae subsp. pneumoniae GN=CS332_13940 PE=4 SV=1	30.0175	16	38	2	573	64.559	6.7	98.2	96.9	90.9	91.3	124.1	98.6
A0A1W1L6H5	galK	Galactokinase OS=Klebsiella pneumoniae GN=galK PE=3 SV=1	28.534	9	29	2	382	41.387	5.55	110.4	107.8	112.2	84.3	101.6	83.7
A0A170GBS1	sbmC	DNA gyrase inhibitor OS=Klebsiella pneumoniae GN=sbmC PE=3 SV=1	60.5096	5	24	1	157	17.749	4.7	82.6	63.9	88.3	123	94.6	147.6
A0A2G4PZZ1	CS372_12070	Inositol-1-monophosphatase OS=Klebsiella pneumoniae GN=CS372_12070 PE=4 SV=1	87.6404	18	35	18	267	29.33	7.18	100.1	99.5	99.6	99.8	100.7	100.4
A0A1V7SLL8	ygiW_1	Periplasmic protein OS=Klebsiella pneumoniae GN=ygiW_1 PE=4 SV=1	71.6418	10	37	4	134	14.686	8.15	72.7	77.3	75.2	126.5	122.7	125.5
A6TBP7	fruB	PTS family enzyme IIA/FPr OS=Klebsiella pneumoniae subsp. pneumoniae (strain ATCC 700721 / MGH 78578) GN=fruB PE=4 SV=1	67.8191	12	26	12	376	39.479	5.11	102.3	101.9	99.5	99.9	98.1	98.3
A0A2G8AHM7	C630_15945	Arabinose 5-phosphate isomerase GutQ OS=Klebsiella pneumoniae subsp. pneumoniae KpO3210 GN=C630_15945 PE=4 SV=1	68.8474	17	30	1	321	34.499	6.13	129.8	141.2	134.7	66.2	71.5	56.6
R4YFY8	KPR_3294	Uncharacterized protein OS=Klebsiella pneumoniae subsp. rhinoscleromatis SB3432 GN=KPR_3294 PE=4 SV=1	87.766	11	25	11	188	20.554	5.58	101.2	102.7	101.9	96.3	98.6	99.3
A0A1C3QFG4	sopA	Plasmid-partitioning protein SopA OS=Klebsiella pneumoniae GN=sopA PE=4 SV=1	43.299	14	28	0	388	43.462	5.6
W1DS05		Replicative DNA helicase OS=Klebsiella pneumoniae IS43 PE=3 SV=1	50.1062	16	29	16	471	52.433	5.06	94.7	94.5	95	104.4	108.9	102.4
A0A0H3GU45	KPHS_31240	Cysteine desulfurase ATPase component OS=Klebsiella pneumoniae subsp. pneumoniae (strain HS11286) GN=KPHS_31240 PE=4 SV=1	78.2258	17	57	17	248	27.73	5.03	98.4	97	101.2	100	103	100.5
W1EP24		PTS system, glucose-specific IIB component / PTS system, glucose-specific IIC component OS=Klebsiella pneumoniae IS53 PE=4 SV=1	33.2636	15	46	15	478	50.753	8.54	115.1	118.5	119.5	81.4	82.3	83.1
A0A060VJN3	rdgC	Recombination-associated protein RdgC OS=Klebsiella pneumoniae GN=rdgC PE=3 SV=1	55.0489	12	30	12	307	34.493	5.17	100	99.6	100.3	100.2	100.6	99.4
B5XXL8	KPK_3507	Isochorismatase hydrolase family protein OS=Klebsiella pneumoniae (strain 342) GN=KPK_3507 PE=4 SV=1	74.6667	8	41	8	225	24.079	5.92	109.1	111.2	111.6	89.6	88.3	90.1
C0LUK9	gnd	6-phosphogluconate dehydrogenase (Fragment) OS=Klebsiella pneumoniae GN=gnd PE=4 SV=1	59.1667	6	29	2	120	13.254	8.68	110.3	100.2	102.2	89.2	101.4	96.8
W8UQK9	guaC	GMP reductase OS=Klebsiella pneumoniae 30684/NJST258_2 GN=guaC PE=3 SV=1	62.6703	13	32	1	367	39.509	6.9	93.1	100.1	105.5	100.3	101.3	99.7
A6THB7	fklB	Peptidyl-prolyl cis-trans isomerase OS=Klebsiella pneumoniae subsp. pneumoniae (strain ATCC 700721 / MGH 78578) GN=fklB PE=3 SV=1	42.9204	8	23	8	226	24.455	4.97	92.5	88.5	88.1	108.2	111.7	110.9
A0A0J4Y2U9	panC	Pantothenate synthetase OS=Klebsiella pneumoniae GN=panC PE=3 SV=1	73.5915	17	39	17	284	31.471	5.73	101.7	103.7	102.2	97.4	98.3	96.6
A6THD2	msrA	Peptide methionine sulfoxide reductase MsrA OS=Klebsiella pneumoniae subsp. pneumoniae (strain ATCC 700721 / MGH 78578) GN=msrA PE=3 SV=1	58.6207	8	25	8	232	25.7	6.02	103.4	101.4	103.4	93.7	103.7	94.3
A0A1W1KFK2	gltD_1	Glutamate synthase small subunit OS=Klebsiella pneumoniae GN=gltD_1 PE=4 SV=1	50.2119	16	23	16	472	51.793	5.52	96.8	94.5	96	102	106.6	104.1
A0A1B2ZWQ0	apt	Adenine phosphoribosyltransferase OS=Klebsiella pneumoniae GN=apt PE=3 SV=1	73.224	9	18	1	183	20.064	5.6	96.3	102.3	102.2	97.4	100.5	101.3
A0A193SCU0	wzi	Surface assembly of capsule OS=Klebsiella pneumoniae GN=wzi PE=4 SV=1	36.6876	13	33	1	477	52.774	5.83
A0A060VGE6	helD	DNA helicase OS=Klebsiella pneumoniae GN=helD PE=3 SV=1	32.4561	17	24	1	684	77.584	8.22	62.1	75	76.8	131.4	124.4	130.4
J2E1U5	UUU_41900	Uncharacterized protein OS=Klebsiella pneumoniae subsp. pneumoniae DSM 30104 GN=UUU_41900 PE=4 SV=1	31.4335	11	20	11	579	62.582	6.04	106.8	103.8	103.4	94.2	95.9	95.8
A0A1S0WCZ7	CTI66_12055	NAD-dependent aldehyde dehydrogenase OS=Klebsiella pneumoniae GN=CTI66_12055 PE=3 SV=1	41.5094	13	24	13	477	50.361	6.34	121.1	107.4	106.6	87.1	89.6	88.2
A0A1W1KPB0	hpcE_2	5-carboxymethyl-2-oxo-hex-3-ene-1,7-dioate decarboxylase OS=Klebsiella pneumoniae GN=hpcE_2 PE=4 SV=1	69.0476	9	29	1	210	22.577	6.34	125.6	121.8	118.9	67.7	105.2	60.8
A0A1W1KRL4	hemE	Uroporphyrinogen decarboxylase OS=Klebsiella pneumoniae GN=hemE PE=3 SV=1	44.3503	10	19	1	354	39.159	6.37	79.6	92.7	103	101.2	105.8	117.7
R4YD25	nagD	NagD protein OS=Klebsiella pneumoniae subsp. rhinoscleromatis SB3432 GN=nagD PE=4 SV=1	56.4	9	22	9	250	27.345	5.6	85.5	85.6	87.7	114.1	112.4	114.8
A6TBY6	yfcE	Phosphoesterase OS=Klebsiella pneumoniae subsp. pneumoniae (strain ATCC 700721 / MGH 78578) GN=yfcE PE=3 SV=1	73.1183	9	25	1	186	20.387	6.27	116.5	118.1	117.4	85.8	85.5	76.7
W1E702		PTS system, diacetylchitobiose-specific IIA component OS=Klebsiella pneumoniae IS46 PE=4 SV=1	90.4762	5	17	1	105	11.559	5.38	67.4	72.3	73.4	133.1	123.3	130.5
A0A2G4PVI2	CS372_16620	TetR/AcrR family transcriptional regulator OS=Klebsiella pneumoniae GN=CS372_16620 PE=4 SV=1	73.0964	13	19	13	197	21.67	6.8	102.2	98	96.4	99.4	105.2	98.7
Q48449		Uncharacterized 55.8 kDa protein in cps region OS=Klebsiella pneumoniae PE=4 SV=1	39.6825	14	45	1	504	55.747	6.25	102.2	117	115.9	87.7	83.9	93.4
A0A0E1CQY7	wecE	dTDP-4-amino-4,6-dideoxygalactose transaminase OS=Klebsiella pneumoniae 30660/NJST258_1 GN=wecE PE=3 SV=1	50.6596	12	22	12	379	42.484	5.74	98.3	102.6	104.7	98.5	99.3	96.5
A0A1W2JLP5	sbmC	DNA gyrase inhibitor OS=Klebsiella pneumoniae GN=sbmC PE=3 SV=1	60.5096	5	23	1	157	17.764	4.64	71.1	65.6	86.6	117.2	132.9	126.7
A0A0J4YT63	SM87_05293	Phosphofructokinase OS=Klebsiella pneumoniae GN=SM87_05293 PE=3 SV=1	44.8718	11	20	11	312	33.835	5.41	100	93.6	93.7	100.9	110.7	101.1
W1DTC1	rpsR	30S ribosomal protein S18 OS=Klebsiella pneumoniae IS43 GN=rpsR PE=3 SV=1	50.6667	5	44	5	75	8.981	10.59	105.3	105.5	106.9	98.1	92	92.2
W1DGR8	pcp	Pyrrolidone-carboxylate peptidase OS=Klebsiella pneumoniae IS43 GN=pcp PE=3 SV=1	74.2991	11	24	2	214	22.369	6.38	76.6	102.8	111	82.1	134.1	93.5
A0A1E3FDE4	BCB67_14285	Plasmid-partitioning protein SopA OS=Klebsiella pneumoniae GN=BCB67_14285 PE=4 SV=1	43.299	14	28	2	388	43.492	5.6	127.3	130.7	128.5	71.5	68.5	73.6
A0A1Y0PSY6	B5K12_06125	ABC transporter ATP-binding protein OS=Klebsiella pneumoniae subsp. pneumoniae GN=B5K12_06125 PE=4 SV=1	66.39	13	38	1	241	26.84	6.04	118.4	122.9	131.8	62.7	95.5	68.7
A0A060VDP0	KpST82_0887	Protein CreA OS=Klebsiella pneumoniae GN=KpST82_0887 PE=4 SV=1	55.814	8	23	8	172	18.905	9.1	101.7	102.9	103.3	98.2	97.5	96.4
A0A1C1RLI9	B4U21_22975	Arabinose 5-phosphate isomerase OS=Klebsiella pneumoniae GN=B4U21_22975 PE=3 SV=1	68.8474	17	30	1	321	34.439	6.29	31.9	28.9	33.9	164.8	165.6	174.8
A0A1C3QBF2	cbiL	Cobalt-factor II C(20)-methyltransferase OS=Klebsiella pneumoniae GN=cbiL PE=3 SV=1	64.4068	11	24	2	236	25.448	5.43	74.4	76.4	88.2	127.9	122.4	110.7
A0A0E1CC77	cutC	Copper homeostasis protein CutC OS=Klebsiella pneumoniae 30660/NJST258_1 GN=cutC PE=3 SV=1	69.6356	12	23	12	247	26.466	6.67	91.1	87.2	86.2	108.7	116.2	110.5
W1AWD5		Glycosyltransferase OS=Klebsiella pneumoniae IS22 PE=4 SV=1	45.5118	23	38	23	635	73.242	6.68	105.8	99	101.4	97.8	97.5	98.5
R4YCK7	cspE	CspE protein OS=Klebsiella pneumoniae subsp. rhinoscleromatis SB3432 GN=cspE PE=4 SV=1	55.6701	7	46	7	97	10.53	9.13	97	101.9	101.9	98.1	94.8	106.3
W1BGL7		D-lactate dehydrogenase OS=Klebsiella pneumoniae IS22 PE=3 SV=1	28.5714	10	41	1	329	36.497	5.44	119.4	108.4	110.1	84.9	87.7	89.5
W1B9H2		PTS IIA-like nitrogen-regulatory protein PtsN OS=Klebsiella pneumoniae IS22 PE=4 SV=1	62.963	8	22	8	162	17.707	5.34	101.2	102.3	102.7	101.6	94.1	98
A0A1Y0PUC9	dsdA	D-serine dehydratase OS=Klebsiella pneumoniae subsp. pneumoniae GN=dsdA PE=3 SV=1	43.6652	13	22	13	442	47.431	5.67	107.9	108	107.9	89.9	94.8	91.5
J2XBD2	UUU_03790	Putative LacI-type transcriptional regulator OS=Klebsiella pneumoniae subsp. pneumoniae DSM 30104 GN=UUU_03790 PE=4 SV=1	57.7348	14	31	14	362	39.646	7.52	102.4	102.9	104.7	96.4	99.6	94
A0A2G8AR83	C630_11200	Formyltetrahydrofolate deformylase OS=Klebsiella pneumoniae subsp. pneumoniae KpO3210 GN=C630_11200 PE=4 SV=1	71.7857	15	31	15	280	31.772	6.89	102.5	105.6	103.1	95.7	93.9	99.2
A0A1B2ZRU1	BCB67_19705	Ketodeoxygluconokinase OS=Klebsiella pneumoniae GN=BCB67_19705 PE=4 SV=1	37.8641	11	21	11	309	33.964	5.02	95.4	99.1	98.8	100.9	104.1	101.7
A0A0C7KHH2	pcp	Pyrrolidone-carboxylate peptidase OS=Klebsiella pneumoniae GN=pcp PE=3 SV=1	74.2991	11	21	2	214	22.371	5.78	110	117	112.6	81.2	95.9	83.3
A0A0H3GSC1	KPHS_22680	Putative bacteriophage protein OS=Klebsiella pneumoniae subsp. pneumoniae (strain HS11286) GN=KPHS_22680 PE=4 SV=1	43.77	8	21	8	313	34.386	5.19	49.7	46.4	48.4	151.7	151.1	152.6
A0A060VE31	cysJ	Sulfite reductase [NADPH] flavoprotein alpha-component OS=Klebsiella pneumoniae GN=cysJ PE=3 SV=1	48.7479	21	37	21	599	66.023	4.96	108.9	103.7	103.2	92.9	100.2	91.1
A0A098C8K3	AGG09_14955	ADP-heptose--LPS heptosyltransferase OS=Klebsiella pneumoniae GN=AGG09_14955 PE=4 SV=1	64.7727	15	30	1	352	39.237	8.22	95.9	100.5	109.2	93.9	109.9	90.6
A0A181W1V9	fkpB	Peptidyl-prolyl cis-trans isomerase OS=Klebsiella pneumoniae GN=fkpB PE=3 SV=1	59.7315	5	12	5	149	16.172	4.54	90.5	94.7	95.1	107.9	108.3	103.6
A0A0E1CMF8	KPNJ1_04118	Acetyltransferase OS=Klebsiella pneumoniae 30660/NJST258_1 GN=KPNJ1_04118 PE=4 SV=1	43.4483	11	22	1	290	33.914	5.4	88	93.7	92.2	115.4	103.3	107.4
A0A0C7KHI8	nagC_2	N-acetylglucosamine repressor OS=Klebsiella pneumoniae GN=nagC_2 PE=4 SV=1	64.2857	19	30	1	406	44.319	7.68	90.9	91.8	94.7	98.2	120.9	103.5
A0A080SP55	lptE	LPS-assembly lipoprotein LptE OS=Klebsiella pneumoniae GN=lptE PE=3 SV=1	60.7143	10	32	1	196	21.412	7.43	113.7	111.5	111	92.3	83.3	88.3
W9BNP7	seqA	Negative modulator of initiation of replication OS=Klebsiella pneumoniae GN=seqA PE=3 SV=1	58.2609	12	31	2	230	25.837	8.81	102.1	104	106.8	95.4	100.2	91.5
A0A2D2G1B9	CTI55_26405	Tellurium resistance protein TerA OS=Klebsiella pneumoniae GN=CTI55_26405 PE=4 SV=1	53.0026	17	39	3	383	41.901	6.34	64.5	58.6	61	138.4	136.7	140.9
R4Y5Z0	yafV	YafV protein OS=Klebsiella pneumoniae subsp. rhinoscleromatis SB3432 GN=yafV PE=4 SV=1	62.3188	12	32	12	276	30.983	6.76	99.4	96.1	94.8	97.2	105.5	107
A0A237P903	lpxA	Acyl-[acyl-carrier-protein]--UDP-N-acetylglucosamine O-acyltransferase OS=Klebsiella pneumoniae subsp. pneumoniae GN=lpxA PE=3 SV=1	40.8397	9	32	1	262	28.108	6.95	146.1	174.5	157.1	37.6	49	35.7
Q0QCD7		S-(hydroxymethyl)glutathione dehydrogenase OS=Klebsiella pneumoniae PE=3 SV=1	57.6531	15	30	14	392	41.625	6.7	46.1	42.9	43.1	162.6	149.1	156.2
W8UKU2	KPNJ2_02885	Transcriptional regulator, GntR family protein OS=Klebsiella pneumoniae 30684/NJST258_2 GN=KPNJ2_02885 PE=4 SV=1	71.0526	12	30	12	228	26.477	6.35	103.6	100.2	99.7	97.5	101.8	97.1
A0A2G4YJ75	CQB04_04670	16S rRNA (Cytosine(1402)-N(4))-methyltransferase OS=Klebsiella pneumoniae GN=CQB04_04670 PE=4 SV=1	61.3419	12	18	7	313	34.746	7.68	98.9	102.7	103	93.1	104.1	98.2
A0A0J4NGH5	lptE	LPS-assembly lipoprotein LptE OS=Klebsiella pneumoniae GN=lptE PE=3 SV=1	60.7143	10	30	1	196	21.414	7.43	121.8	119.7	121.7	82.8	73.3	80.7
A0A1W1KUG8	seqA	Negative modulator of initiation of replication OS=Klebsiella pneumoniae GN=seqA PE=3 SV=1	57.3913	11	29	1	230	25.839	8.81	91.2	94.4	105.7	97.4	110.2	101.2
A0A0H3GX66	KPHS_41030	Competence damage-inducible protein A OS=Klebsiella pneumoniae subsp. pneumoniae (strain HS11286) GN=KPHS_41030 PE=3 SV=1	55.7576	7	19	7	165	17.385	5.6	95.4	93.1	92.8	105.8	107	105.8
A0A0E1CBN7	rpsS	30S ribosomal protein S19 OS=Klebsiella pneumoniae 30660/NJST258_1 GN=rpsS PE=3 SV=1	68.4783	7	41	5	92	10.41	10.52	97.7	105.9	104	101.9	88.8	101.8
A0A0W8AQX7	nuoB	NADH-quinone oxidoreductase subunit B OS=Klebsiella pneumoniae GN=nuoB PE=3 SV=1	47.3214	10	40	10	224	25.502	5.99	92.7	91.8	92	109.1	108	106.4
A0A0E1CI91	KPNJ1_02633	SSU ribosomal protein S22P OS=Klebsiella pneumoniae 30660/NJST258_1 GN=KPNJ1_02633 PE=4 SV=1	48.2759	3	18	3	58	6.655	10.43	95.4	101.6	103.6	95.5	106.2	97.6
A0A0C7K892	acsC	Cellulose synthase operon protein C OS=Klebsiella pneumoniae GN=acsC PE=4 SV=1	20.5926	17	29	4	1350	144.969	6.55	97	92.7	91.6	104	111.2	103.5
J2X132	UUU_42990	Regulatory ATPase RavA OS=Klebsiella pneumoniae subsp. pneumoniae DSM 30104 GN=UUU_42990 PE=4 SV=1	37.8758	12	18	1	499	56.638	6.55	103.6	97.4	100.3	94.8	105.6	98.2
A0A2D2PHS5	hpaD	3,4-dihydroxyphenylacetate 2,3-dioxygenase OS=Klebsiella pneumoniae GN=hpaD PE=4 SV=1	45.614	13	32	1	285	32.016	6.3	42.1	39.3	41.6	165.8	158.5	152.7
A0A060VE30	cysN	Sulfate adenylyltransferase subunit 1 OS=Klebsiella pneumoniae GN=cysN PE=3 SV=1	40	16	26	1	475	52.529	5.26	123.4	110.8	109	74.9	106.6	75.3
A0A1W1KKK4	gsiA_12	Dipeptide transport ATP-binding protein DppD OS=Klebsiella pneumoniae GN=gsiA_12 PE=3 SV=1	53.8226	14	24	14	327	35.757	6.87	94.2	89.5	92.5	109.4	108.2	106.1
A0A1C3QAP5	btuB	Vitamin B12 transporter BtuB OS=Klebsiella pneumoniae GN=btuB PE=3 SV=1	40.1961	15	22	4	612	68.053	5.44	94.4	93	86.1	101	113.7	111.9
W8UK19	KPNJ2_02635	Diaminobutyrate decarboxylase OS=Klebsiella pneumoniae 30684/NJST258_2 GN=KPNJ2_02635 PE=3 SV=1	45.8418	14	25	14	493	54.01	5.49	91.4	91.2	89.7	109.7	108.9	109.2
A0A169DH07	dppA_5	Dipeptide-binding ABC transporter OS=Klebsiella pneumoniae GN=dppA_5 PE=4 SV=1	42.3372	13	29	2	522	56.782	8.15	71.7	63.2	63	137.3	139.8	125
A0A1E3F0E6	menD	2-succinyl-5-enolpyruvyl-6-hydroxy-3-cyclohexene-1-carboxylate synthase OS=Klebsiella pneumoniae GN=menD PE=3 SV=1	36.5108	11	21	11	556	60.436	6.99	111	102.1	100.5	92.1	100.4	93.9
A0A0E1CG45	KPNJ1_03461	Acidic protein msyB OS=Klebsiella pneumoniae 30660/NJST258_1 GN=KPNJ1_03461 PE=4 SV=1	62.5	4	22	3	128	14.754	3.69	96.1	99.5	98	94.1	109	103.2
A0A0H3GVT8	KPHS_35580	dTDP-glucose 4,6-dehydratase OS=Klebsiella pneumoniae subsp. pneumoniae (strain HS11286) GN=KPHS_35580 PE=3 SV=1	57.6271	13	31	12	354	39.332	5.85	55.4	50.5	51.3	149	145.8	148.1
A0A1Y0PTL8	B5K12_16625	Endo-1,4-D-glucanase OS=Klebsiella pneumoniae subsp. pneumoniae GN=B5K12_16625 PE=4 SV=1	40.1084	12	22	12	369	40.875	6.58	94.2	93	92.7	102.7	104.7	112.7
A0A0H3GGS5	KPHS_00050	Regulatory ATPase RavA OS=Klebsiella pneumoniae subsp. pneumoniae (strain HS11286) GN=KPHS_00050 PE=4 SV=1	37.8758	12	18	1	499	56.642	6.55	92.8	92.9	92.1	106.9	107.9	107.5
W1EN13	apt	Adenine phosphoribosyltransferase OS=Klebsiella pneumoniae IS53 GN=apt PE=3 SV=1	73.224	9	16	1	183	20.081	5.41	64.3	77.7	63.5	111.9	151.7	130.9
A0A060VEQ1	proP	Glycine/betaine ABC transporter OS=Klebsiella pneumoniae GN=proP PE=4 SV=1	18.8	11	37	11	500	54.735	7.55	108	110.5	111.5	89.9	91.6	88.4
W1AQU7	prmA	Ribosomal protein L11 methyltransferase OS=Klebsiella pneumoniae IS22 GN=prmA PE=3 SV=1	40.273	7	16	1	293	31.857	4.48	81.6	92.9	104.5	83.7	113.1	124.3
A0A0S3FHL9	AGG09_22920	Uncharacterized protein OS=Klebsiella pneumoniae GN=AGG09_22920 PE=4 SV=1	32.7044	12	30	1	477	52.869	5.58	43.6	48.3	55.6	153.5	141.7	157.3
W8UMH0	KPNJ2_04314	Mannokinase OS=Klebsiella pneumoniae 30684/NJST258_2 GN=KPNJ2_04314 PE=4 SV=1	51.0324	13	24	2	339	36.241	5.53	121.4	120.7	120.7	78.7	84.1	74.2
A0A181J5B7	pyrE	Orotate phosphoribosyltransferase OS=Klebsiella pneumoniae GN=pyrE PE=3 SV=1	63.3803	11	23	1	213	23.579	6.21	128.6	99.6	87.5	87	116.6	80.6
W1B2W7		UPF0227 protein OS=Klebsiella pneumoniae IS22 PE=3 SV=1	78.8889	11	49	1	180	21.063	6.68	90.4	87.9	89	111.8	111.1	109.7
A0A0C7KJP4	lpxB	Lipid-A-disaccharide synthase OS=Klebsiella pneumoniae GN=lpxB PE=3 SV=1	40.2089	10	17	10	383	42.351	7.96	105.8	101	102.7	94.7	100.4	95.3
A0A164BEP8	pulA	DUF3372 domain-containing protein OS=Klebsiella pneumoniae GN=pulA PE=3 SV=1	25.6806	18	22	18	1102	119.101	4.91	98.4	93.9	91.2	101.5	114.5	100.5
J2DMP2	UUU_16390	Cys regulon transcriptional activator CysB OS=Klebsiella pneumoniae subsp. pneumoniae DSM 30104 GN=UUU_16390 PE=4 SV=1	55.0914	16	35	16	383	42.12	8.73	95.1	94.9	95.8	103.1	105	106
A0A1Y0PWC7	B5K12_11145	Polyphenol oxidase OS=Klebsiella pneumoniae subsp. pneumoniae GN=B5K12_11145 PE=3 SV=1	67.4897	11	21	11	243	26.536	5.92	105.6	102.4	105.3	95.4	98.9	92.3
A0A2D1LVG3	aac(6')-Ib-cr	Aminoglycoside 6'-N-acetyltransferase (Fragment) OS=Klebsiella pneumoniae GN=aac(6')-Ib-cr PE=4 SV=1	51.4851	6	21	3	101	10.764	4.77	78.4	75.2	81.4	111.6	137.3	116
W8UMZ9	KPNJ2_04473	Lysine decarboxylase OS=Klebsiella pneumoniae 30684/NJST258_2 GN=KPNJ2_04473 PE=4 SV=1	40.5699	19	28	16	737	83.451	5.55	101.4	101.6	101.8	93.6	99.6	102.1
C8TBI4	rsmA	Ribosomal RNA small subunit methyltransferase A OS=Klebsiella pneumoniae subsp. rhinoscleromatis ATCC 13884 GN=rsmA PE=3 SV=1	57.8755	13	28	13	273	30.563	8.02	96.1	98.8	98.6	99.2	104.4	102.9
A0A1Y0PY27	B5K12_22555	Isomerase OS=Klebsiella pneumoniae subsp. pneumoniae GN=B5K12_22555 PE=4 SV=1	45.8333	8	20	1	264	29.43	5	138.1	123.6	129.9	61.8	81.8	64.9
A0A164JJD4	malQ	4-alpha-glucanotransferase OS=Klebsiella pneumoniae GN=malQ PE=3 SV=1	49.9283	23	35	4	697	78.461	6.8	99	93.6	92.8	95.6	112.4	106.6
A0A060VEB5	yqcA	YqcA protein OS=Klebsiella pneumoniae GN=yqcA PE=4 SV=1	63.1579	6	25	6	171	18.665	4.68	96.1	95.9	96.3	99.9	112.6	99.2
R4Y8H3	aroK	Shikimate kinase 1 OS=Klebsiella pneumoniae subsp. rhinoscleromatis SB3432 GN=aroK PE=3 SV=1	78.6127	13	40	13	173	19.474	5.11	93.2	92.3	92.1	107.3	109.3	105.8
A0A236B484	argB	Acetylglutamate kinase OS=Klebsiella pneumoniae subsp. pneumoniae GN=argB PE=3 SV=1	44.186	9	19	9	258	26.994	5.41	97.1	97.5	97.4	100.6	105.6	101.8
A0A2A2NQ40	nqrC	Na(+)-translocating NADH-quinone reductase subunit C OS=Klebsiella pneumoniae GN=nqrC PE=3 SV=1	42.803	8	19	2	264	28.378	7.37	84.5	94.1	94.9	107	113.9	105.6
A0A1B2ZZ45	BCB67_25875	NAD(P)H nitroreductase OS=Klebsiella pneumoniae GN=BCB67_25875 PE=4 SV=1	60.1093	11	32	2	183	20.146	7.25	109.7	110.8	111.2	89.9	90	88.4
A0A0H3GM24	KPHS_03290	Ribose ABC superfamily ATP binding cassette transporter, binding protein OS=Klebsiella pneumoniae subsp. pneumoniae (strain HS11286) GN=KPHS_03290 PE=4 SV=1	56.23	9	22	9	313	32.599	6.29	87.1	90.2	92.2	111.4	110.8	108.4
A0A0H3GQT2	KPHS_36070	Ribitol kinase OS=Klebsiella pneumoniae subsp. pneumoniae (strain HS11286) GN=KPHS_36070 PE=4 SV=1	40.5607	17	27	17	535	56.701	5.9	98.5	91.9	91.1	102	114.4	102.1
C0LUL0	gnd	6-phosphogluconate dehydrogenase (Fragment) OS=Klebsiella pneumoniae GN=gnd PE=4 SV=1	40	4	28	1	120	13.256	9.04	115.2	109.9	110.5	96.3	83.7	84.4
A0A2A5IEG6	CI704_17745	Thiamine ABC transporter substrate binding subunit OS=Klebsiella pneumoniae subsp. pneumoniae GN=CI704_17745 PE=4 SV=1	55.6575	13	24	13	327	36.069	8.24	96.2	95.4	95.8	103.3	104.5	104.8
A0A0C7KD27	rssA	NTE family protein RssA OS=Klebsiella pneumoniae GN=rssA PE=4 SV=1	58.6667	13	24	13	300	33.28	8.69	111.1	102.9	101.1	90.7	101.2	93.1
W1EJ02		Chromosome (Plasmid) partitioning protein ParA OS=Klebsiella pneumoniae IS53 PE=4 SV=1	43.299	14	28	2	388	43.449	5.72	36.7	32.6	36.3	161.4	161.4	171.6
R4YD83	glnB	GlnB protein OS=Klebsiella pneumoniae subsp. rhinoscleromatis SB3432 GN=glnB PE=3 SV=1	65.1786	7	26	7	112	12.422	5.34	99.6	100.2	101.6	101.3	97.3	99.9
A0A098CAV6	AGG09_27870	Isomerase OS=Klebsiella pneumoniae GN=AGG09_27870 PE=4 SV=1	45.8333	8	20	1	264	29.472	5	98.1	102.9	104.6	105.1	96	93.2
A0A060VJE1	pyrB	Aspartate carbamoyltransferase OS=Klebsiella pneumoniae GN=pyrB PE=3 SV=1	58.5209	14	24	14	311	34.232	6.13	103.6	104.9	104.8	94.2	97.9	94.6
V0B7X3	HMPREF1619_01315	Aspartate racemase OS=Klebsiella pneumoniae 909957 GN=HMPREF1619_01315 PE=3 SV=1	50.5929	7	13	1	253	27.436	5.43	105.4	97.1	97.6	87.9	105.1	106.8
A0A060VEG5	KpST82_3888	Uncharacterized protein OS=Klebsiella pneumoniae GN=KpST82_3888 PE=3 SV=1	46.7153	7	13	1	274	29.985	6.06	97.6	109.9	114	95	86.8	96.7
A0A060VHD8	ubiD	3-octaprenyl-4-hydroxybenzoate carboxy-lyase OS=Klebsiella pneumoniae GN=ubiD PE=3 SV=1	44.6029	17	25	1	491	55.166	5.81	94	99	94.8	96.5	107.2	108.4
A0A0C7KIU5	rodZ	Cytoskeleton protein RodZ OS=Klebsiella pneumoniae GN=rodZ PE=3 SV=1	38.0665	10	31	10	331	35.21	6.57	106.5	107.9	106.8	93	93.8	92
A0A060VPT4	rlmB	23S rRNA (guanosine-2'-O-)-methyltransferase RlmB OS=Klebsiella pneumoniae GN=rlmB PE=3 SV=1	46.9136	9	21	9	243	26.551	6.43	99.1	99.9	99.5	100.4	99.7	101.3
W1HRI2		YcfF/hinT protein: a purine nucleoside phosphoramidase OS=Klebsiella pneumoniae IS39 PE=4 SV=1	72.8814	7	23	6	118	13.093	6.4	100.1	98.8	96.4	100.7	105	99
R4Y5B2	rpsT	30S ribosomal protein S20 OS=Klebsiella pneumoniae subsp. rhinoscleromatis SB3432 GN=rpsT PE=3 SV=1	43.6782	6	32	6	87	9.664	11.18	100.6	100.9	100.8	101.2	97.1	99.4
A0A060VH57	gpmB	Probable phosphoglycerate mutase GpmB OS=Klebsiella pneumoniae GN=gpmB PE=3 SV=1	61.3333	11	19	11	225	25.011	6.64	92.7	89	90.2	105.7	115.8	106.6
A0A0E1C7B0	KPNJ1_00175	Uncharacterized protein OS=Klebsiella pneumoniae 30660/NJST258_1 GN=KPNJ1_00175 PE=4 SV=1	69.3333	5	18	5	75	8.871	7.18	94.6	98.8	98.8	104.7	101.4	101.7
W8UQA0	KPNJ2_01023	Transcriptional regulator, LacI family protein OS=Klebsiella pneumoniae 30684/NJST258_2 GN=KPNJ2_01023 PE=4 SV=1	55.0595	13	30	1	336	37.376	6.32	87.4	97.8	100	106.7	98.8	109.4
B5XRN0	ompN	Outer membrane protein N OS=Klebsiella pneumoniae (strain 342) GN=ompN PE=4 SV=1	27.8075	7	82	1	374	41.695	4.81	101.4	91	105.2	90.3	96.5	115.6
A0A1Y0PTY3	AN663_04320	Phosphoglycolate phosphatase OS=Klebsiella pneumoniae subsp. pneumoniae GN=AN663_04320 PE=3 SV=1	50.9881	7	17	5	253	27.421	4.73	85.6	88.8	86.2	111.3	117.1	111
W8UQB0	ftsN	Cell division protein FtsN OS=Klebsiella pneumoniae 30684/NJST258_2 GN=ftsN PE=3 SV=1	57.764	12	31	12	322	36.154	10.18	103.1	98.1	96.5	99.4	104	99
A0A0E1CFR3	cdd	Cytidine deaminase OS=Klebsiella pneumoniae 30660/NJST258_1 GN=cdd PE=3 SV=1	38.0952	7	23	1	294	31.457	5.91	88.8	86.8	88.1	98.8	131.3	106.1
A0A0H3H054	dut	Deoxyuridine 5'-triphosphate nucleotidohydrolase OS=Klebsiella pneumoniae subsp. pneumoniae (strain HS11286) GN=dut PE=3 SV=1	69.0789	6	15	6	152	16.152	5.78	104.6	91.6	90.1	102.4	109.2	102.1
A0A235TFZ5	B5K12_16175	ADP-heptose--LPS heptosyltransferase OS=Klebsiella pneumoniae subsp. pneumoniae GN=B5K12_16175 PE=4 SV=1	64.7727	15	27	1	352	39.264	8.02	102.4	93.2	100.3	90.9	105.1	108.2
A0A0A8JBI1	wza	Capsule polysaccharide export protein OS=Klebsiella pneumoniae GN=wza PE=4 SV=1	34.127	8	23	1	378	41.474	6.28	104.4	103.1	99.5	98.1	99	95.8
A0A1W1KQB0	atpC	ATP synthase epsilon chain OS=Klebsiella pneumoniae GN=atpC PE=3 SV=1	53.9568	4	28	1	139	15.057	6.54	111	114.1	101.4	95.3	94.7	83.6
A0A170C4K8	ycgF_2	BLUF domain/cyclic diguanylate phosphodiesterase (EAL) domain protein OS=Klebsiella pneumoniae GN=ycgF_2 PE=4 SV=1	47.8908	16	30	16	403	45.3	5.06	98.6	97.3	96.5	99	108.9	99.8
A0A0H3GTM3	trmJ	tRNA (cytidine/uridine-2'-O-)-methyltransferase TrmJ OS=Klebsiella pneumoniae subsp. pneumoniae (strain HS11286) GN=trmJ PE=4 SV=1	43.0328	7	20	7	244	26.781	6.42	103.5	99.1	98.9	93.8	113.2	91.5
W1B937	glgB	1,4-alpha-glucan branching enzyme GlgB OS=Klebsiella pneumoniae IS22 GN=glgB PE=3 SV=1	24.5879	17	39	2	728	84.284	6.37	85.8	89.8	87.2	94.6	124.8	117.7
A0A2D2PRV6	CR231_18070	NADPH-dependent 7-cyano-7-deazaguanine reductase QueF OS=Klebsiella pneumoniae GN=CR231_18070 PE=4 SV=1	75.4448	16	35	1	281	31.855	6.38	114	115.9	116.3	81.9	78.2	93.6
A0A1Y0PU96	queF	NADPH-dependent 7-cyano-7-deazaguanine reductase OS=Klebsiella pneumoniae subsp. pneumoniae GN=queF PE=3 SV=1	75.4448	16	34	1	281	31.856	6.23	94.1	93.2	91	114.3	102.8	104.6
J2X6Q6	UUU_22730	Phospho-2-dehydro-3-deoxyheptonate aldolase OS=Klebsiella pneumoniae subsp. pneumoniae DSM 30104 GN=UUU_22730 PE=3 SV=1	60.5263	16	27	16	380	42.244	7.52	105	104.1	101.5	95.8	98	95.6
A0A1B2ZS02	glyQ	Glycine--tRNA ligase alpha subunit OS=Klebsiella pneumoniae GN=glyQ PE=3 SV=1	36.6337	9	26	1	303	34.696	5.11	101.7	122	116.3	72.2	118.7	69.1
A0A2G3S1X9	CS332_01950	3-phosphoserine/phosphohydroxythreonine transaminase OS=Klebsiella pneumoniae subsp. pneumoniae GN=CS332_01950 PE=4 SV=1	21.547	8	22	2	362	39.377	5.58	93.9	101.9	98.8	102.9	99.2	103.3
A0A230E8A9	BB785_03910	NADH-dependent alcohol dehydrogenase OS=Klebsiella pneumoniae GN=BB785_03910 PE=4 SV=1	41.0853	13	27	13	387	42.267	5.47	104.7	95.6	97.9	100.5	103.1	98.2
A0A170BZ74	kdsB	3-deoxy-manno-octulosonate cytidylyltransferase OS=Klebsiella pneumoniae GN=kdsB PE=3 SV=1	69.3548	11	21	11	248	27.317	5.19	103.2	104.3	103.5	94.3	102.7	92
A0A1C3PPD0	ndh	FAD-dependent pyridine nucleotide-disulfide oxidoreductase OS=Klebsiella pneumoniae GN=ndh PE=4 SV=1	52.765	17	28	17	434	47.23	9.32	100.3	102	102.9	97.1	100.6	97.1
R4Y4Q2	KPR_0607	Uncharacterized protein OS=Klebsiella pneumoniae subsp. rhinoscleromatis SB3432 GN=KPR_0607 PE=4 SV=1	49.2188	8	27	8	128	13.874	8.31	92.7	94.9	94.8	106.5	105	106.2
W1DSB0		Cell division transporter, ATP-binding protein FtsE (TC 3.A.5.1.1) OS=Klebsiella pneumoniae IS43 PE=4 SV=1	66.6667	11	25	11	222	24.23	9.33	98.5	98.6	97.8	100.8	102.9	101.5
A0A1C3PWE9	pntB	NAD(P) transhydrogenase subunit beta OS=Klebsiella pneumoniae GN=pntB PE=3 SV=1	31.3853	10	32	10	462	48.74	6.04	104.2	108	106.3	96	93.1	92.5
A0A2D3CCX9	BMF28_07185	Cell division protein ZipA OS=Klebsiella pneumoniae GN=BMF28_07185 PE=4 SV=1	32.5779	8	26	3	353	39.161	6.47	129.5	121.6	114.9	76.5	79.5	78.1
A0A2H2WBK9	BB785_19960	Oxidoreductase OS=Klebsiella pneumoniae GN=BB785_19960 PE=4 SV=1	59.1093	10	20	1	247	25.111	5.4	118.4	126	123.6	70.1	71.2	90.7
A0A0H3GP01	thiL	Thiamine-monophosphate kinase OS=Klebsiella pneumoniae subsp. pneumoniae (strain HS11286) GN=thiL PE=3 SV=1	55.418	11	21	2	323	34.676	4.83	90.6	79.4	87.2	114.6	116.1	112
A0A1E3F8M7	BCB67_20195	Outer membrane-stress sensor serine endopeptidase DegS OS=Klebsiella pneumoniae GN=BCB67_20195 PE=4 SV=1	34.6591	7	16	7	352	37.011	6.32	94.2	96.5	97.9	106.2	101.8	103.5
A0A0S3FGY7	AGG09_22930	Tyrosine protein kinase OS=Klebsiella pneumoniae GN=AGG09_22930 PE=4 SV=1	31.9386	17	24	13	717	79.197	7.85	51.9	49.3	50.1	151.9	148.4	148.4
A6TFM8	rpmB	50S ribosomal protein L28 OS=Klebsiella pneumoniae subsp. pneumoniae (strain ATCC 700721 / MGH 78578) GN=rpmB PE=3 SV=1	57.6923	9	49	9	78	9.001	11.41	103.5	105.2	105.2	95.3	90	100.7
A0A0E1C9H0	KPNJ1_01069	Uncharacterized protein OS=Klebsiella pneumoniae 30660/NJST258_1 GN=KPNJ1_01069 PE=4 SV=1	35.5263	2	67	2	76	8.278	5.97	111.9	117.5	118.1	87.3	76.4	88.9
A0A0E1CK94	KPNJ1_04744	Bifunctional aspartokinase/homoserine dehydrogenase OS=Klebsiella pneumoniae 30660/NJST258_1 GN=KPNJ1_04744 PE=3 SV=1	29.7362	14	19	14	834	90.143	6.13	94.6	98.6	97.2	96.5	111	102.2
A0A0E1CM38	KPNJ1_03988	D-ribose-binding protein OS=Klebsiella pneumoniae 30660/NJST258_1 GN=KPNJ1_03988 PE=4 SV=1	64.9518	15	28	1	311	33.161	6.7	89.1	87.9	86.7	113.7	118.6	104.1
A0A060VGY6	pncA	Nicotinamidase OS=Klebsiella pneumoniae GN=pncA PE=4 SV=1	46.0094	6	18	1	213	23.119	4.79	98.6	112.2	109.5	90	94	95.6
A0A0E1CK38	KPNJ1_04823	2-hydroxyhepta-2,4-diene-1,7-dioate isomerase OS=Klebsiella pneumoniae 30660/NJST258_1 GN=KPNJ1_04823 PE=4 SV=1	70.4762	10	23	1	210	22.529	6.2	124.4	124.1	110.3	74.4	87.1	79.7
A0A169R2R9	rsmB	Ribosomal RNA small subunit methyltransferase B OS=Klebsiella pneumoniae GN=rsmB PE=3 SV=1	45.7077	12	24	5	431	48.506	8.03	95.2	87.3	84.9	105.5	122.3	104.8
B5XYE3	rsd	Regulator of sigma D OS=Klebsiella pneumoniae (strain 342) GN=rsd PE=3 SV=1	31.5152	4	20	4	165	18.763	4.63	98.6	95.9	96.2	100.4	108.1	100.9
A0A1Y0Q673	B5K12_18145	Inosose isomerase OS=Klebsiella pneumoniae subsp. pneumoniae GN=B5K12_18145 PE=4 SV=1	50.1832	8	20	8	273	30.599	5.76	100	98.2	98.1	97	108.6	98
A0A2D3CPJ2	KPH11_01010	Glucose dehydrogenase OS=Klebsiella pneumoniae subsp. pneumoniae GN=KPH11_01010 PE=4 SV=1	60.241	10	24	1	249	26.501	6.11	105.3	103.3	103.1	92.7	102.2	93.3
A0A0E1CE44	rlmM	Ribosomal RNA large subunit methyltransferase M OS=Klebsiella pneumoniae 30660/NJST258_1 GN=rlmM PE=3 SV=1	47.0109	12	26	12	368	42.154	6.99	105.9	102.9	103.6	94.7	96.8	96.1
A0A1B3A5N0	BCB67_16560	Uncharacterized protein OS=Klebsiella pneumoniae GN=BCB67_16560 PE=4 SV=1	40.597	10	27	10	335	36.977	6.42	95.8	89	88	105.5	117.2	104.5
A6THH3	pyrI	Aspartate carbamoyltransferase regulatory chain OS=Klebsiella pneumoniae subsp. pneumoniae (strain ATCC 700721 / MGH 78578) GN=pyrI PE=3 SV=1	74.5098	8	20	8	153	17.121	6.9	97.7	96.9	95.1	90	125.9	94.4
A0A0E1CAB9	KPNJ1_01381	Anti-sigma-E factor RseA OS=Klebsiella pneumoniae 30660/NJST258_1 GN=KPNJ1_01381 PE=3 SV=1	57.8947	8	15	8	228	25.391	5.87	95.5	94.2	94.5	99.9	107.7	108.1
W1H3I6		YpfJ protein, zinc metalloprotease superfamily OS=Klebsiella pneumoniae ISC21 PE=4 SV=1	44.4068	8	20	8	295	31.872	6.54	103.6	106.6	105.2	95	92	97.6
A0A1W1JAF1	patA	Putrescine aminotransferase OS=Klebsiella pneumoniae GN=patA PE=3 SV=1	48.5839	19	33	1	459	49.456	6.15	113.6	103.3	119.4	86.5	88.4	88.8
A0A0C7KG71	uup	ABC transporter ATP-binding protein uup OS=Klebsiella pneumoniae GN=uup PE=4 SV=1	35.1181	17	31	17	635	71.466	5.55	104.7	98.4	97.3	99.9	101.8	97.9
A0A2G8A9G7	C630_25250	2-oxo-hepta-3-ene-1,7-dioic acid hydratase OS=Klebsiella pneumoniae subsp. pneumoniae KpO3210 GN=C630_25250 PE=4 SV=1	71.161	8	21	8	267	29.584	5.69	102.5	102.3	102.3	98.2	97.8	96.9
W1DYD1		Protein yciN OS=Klebsiella pneumoniae IS46 PE=4 SV=1	89.1566	7	24	7	83	9.475	5.12	86.2	85.4	84	111.6	117.9	114.9
W9B5N3	BN49_1537	Uncharacterized protein OS=Klebsiella pneumoniae GN=BN49_1537 PE=4 SV=1	43.4483	11	21	1	290	33.888	5.4	122.7	127.1	122	67.7	80.2	80.4
A0A1S0WBX9	CTI63_15895	Nicotinamidase/pyrazinamidase OS=Klebsiella pneumoniae GN=CTI63_15895 PE=4 SV=1	46.0094	6	15	1	213	23.093	4.79	112.9	111	110.3	83.9	93.2	88.7
H2CZH6	wza	Capsule polysaccharide export protein OS=Klebsiella pneumoniae subsp. pneumoniae GN=wza PE=4 SV=1	31.8302	8	27	2	377	41.445	6.4	107.6	106.4	109.3	94.3	94.7	87.8
W8VFB1	zipA	Cell division protein ZipA OS=Klebsiella pneumoniae 30684/NJST258_2 GN=zipA PE=3 SV=1	29.1892	7	23	2	370	41.221	6.6	83.2	70.5	67.2	120.2	124.7	134.1
A0A1C3Q8D2	murA	UDP-N-acetylglucosamine 1-carboxyvinyltransferase OS=Klebsiella pneumoniae GN=murA PE=3 SV=1	55.3699	20	45	20	419	44.584	5.88	95.1	93.5	93.3	104.2	111.1	102.8
A0A060VE33	ispF	2-C-methyl-D-erythritol 2,4-cyclodiphosphate synthase OS=Klebsiella pneumoniae GN=ispF PE=3 SV=1	74.2138	7	24	1	159	16.891	6.28	83.4	84.1	86.8	113.8	114.5	117.4
A0A024GWG5	wzi	Surface assembly of capsule OS=Klebsiella pneumoniae GN=wzi PE=4 SV=1	35.0105	13	31	2	477	52.703	5.83	87.3	88.5	87.2	124.8	109.8	102.3
A6TA06	purR	HTH-type transcriptional repressor PurR OS=Klebsiella pneumoniae subsp. pneumoniae (strain ATCC 700721 / MGH 78578) GN=purR PE=3 SV=1	55.132	13	22	13	341	38.037	6.62	97.7	95.1	95	103.5	103.1	105.7
B5XS25	rluB	Pseudouridine synthase OS=Klebsiella pneumoniae (strain 342) GN=rluB PE=3 SV=1	55.6667	14	23	14	300	33.845	10.05	106.3	108.6	108.7	90.9	96.2	89.3
A0A2D1J1J3	CR230_13970	Fructokinase OS=Klebsiella pneumoniae GN=CR230_13970 PE=4 SV=1	56.9079	12	22	1	304	32.418	5.66	47.9	40.2	47.4	143.3	160.5	160.6
A0A0C7KI99	kefA_1	Potassium efflux system KefA OS=Klebsiella pneumoniae GN=kefA_1 PE=4 SV=1	23.2642	18	27	18	1109	123.866	7.09	108	100.5	100.2	93.3	103.6	94.3
W1EH57		5-carboxymethyl-2-oxo-hex-3-ene-1,7-dioate decarboxylase / 2-hydroxyhepta-2,4-diene-1,7-dioate isomerase OS=Klebsiella pneumoniae IS53 PE=4 SV=1	51.5748	11	27	5	254	28.634	4.89	145	122.6	121	65.7	80.8	64.8
W0S8W1	wzc	Tyrosine-protein kinase (Fragment) OS=Klebsiella pneumoniae GN=wzc PE=4 SV=1	39.9209	17	27	10	506	56.525	5.68	51.5	42.3	46	149.8	164.9	145.6
A0A1B2ZMJ3	BCB67_19430	Peptide ABC transporter substrate-binding protein SapA OS=Klebsiella pneumoniae GN=BCB67_19430 PE=4 SV=1	47.7148	18	27	12	547	61.566	7.55	100.9	100.8	101.6	97.3	102	97.3
A0A2D1IXF6	CR230_06070	Trk system potassium transporter TrkA OS=Klebsiella pneumoniae GN=CR230_06070 PE=4 SV=1	33.8428	13	21	13	458	50.236	6.11	100.9	102.5	105.6	97.5	100.9	92.6
A0A1W1JG15	glpR_9	Transcriptional regulator YciT OS=Klebsiella pneumoniae GN=glpR_9 PE=4 SV=1	83.1325	18	29	18	249	27.554	7.12	97.9	98.4	96.8	100.6	105.8	100.5
W1HLH3		Zinc uptake regulation protein ZUR OS=Klebsiella pneumoniae IS39 PE=3 SV=1	83.6257	9	19	9	171	19.108	6.83	97.9	100.6	98.4	100.2	101.8	101.1
A0A1Y5AV28	B8011_26785	Colibactin self-protection protein ClbS OS=Klebsiella pneumoniae GN=B8011_26785 PE=4 SV=1	54.1176	9	22	9	170	19.666	8.53	152.5	160.5	160.6	40.1	46.9	39.4
A0A181VGP2	trpA	Tryptophan synthase alpha chain OS=Klebsiella pneumoniae GN=trpA PE=3 SV=1	47.2119	9	19	9	269	28.584	5.1	100.4	100.2	99	101	100.2	99.2
A0A2G3S2U6	CS332_00795	DNA-binding response regulator OS=Klebsiella pneumoniae subsp. pneumoniae GN=CS332_00795 PE=4 SV=1	56.8966	14	50	2	232	26.258	5.66	96.6	87	95.1	103.1	111.2	107
A0A246R8D2	B5K12_09865	Polyketide synthase OS=Klebsiella pneumoniae subsp. pneumoniae GN=B5K12_09865 PE=4 SV=1	31.6832	23	26	23	1010	108.375	5.25	130.2	128	126.8	66.1	80.5	68.4
A0A0E1C7U4	argR	Arginine repressor OS=Klebsiella pneumoniae 30660/NJST258_1 GN=argR PE=3 SV=1	54.4872	5	21	5	156	17.028	5.35	95.9	96.2	97.2	101.6	110.8	98.4
A0A181T2W9	hpcD	5-carboxymethyl-2-hydroxymuconate delta-isomerase OS=Klebsiella pneumoniae GN=hpcD PE=4 SV=1	80.9524	8	20	8	126	14.306	6.68	114.9	114.3	113.6	85.3	87.7	84.1
A0A2G8AA56	C630_26755	Uncharacterized protein OS=Klebsiella pneumoniae subsp. pneumoniae KpO3210 GN=C630_26755 PE=4 SV=1	93.9394	4	16	4	66	7.231	4.56	97.7	100.9	102.6	95.5	95.1	108.2
W1B6I2	tyrS	Tyrosine--tRNA ligase OS=Klebsiella pneumoniae IS22 GN=tyrS PE=3 SV=1	27.1028	9	23	1	428	47.997	5.68	96.1	102.2	86.1	104	102.5	109.1
F5HN16	wzc	Putative transmembrane protein OS=Klebsiella pneumoniae GN=wzc PE=4 SV=1	38.0028	21	32	8	721	80.291	7.94	77.3	63.4	60.3	136.1	134.3	128.6
A0A098C602	AGG09_08220	Cytochrome ubiquinol oxidase subunit I OS=Klebsiella pneumoniae GN=AGG09_08220 PE=3 SV=1	15.9879	10	34	10	663	74.215	7.02	106.8	108	109.8	88.6	87.6	99.2
A0A2G4YGA1	CQB04_13835	Thiamine-phosphate kinase OS=Klebsiella pneumoniae GN=CQB04_13835 PE=4 SV=1	55.418	11	21	2	323	34.727	4.83	134.9	137.3	135.2	63.7	65.3	63.6
A0A0E1CDI0	KPNJ1_02305	5-methyltetrahydropteroyltriglutamate--homocysteine methyltransferase OS=Klebsiella pneumoniae 30660/NJST258_1 GN=KPNJ1_02305 PE=4 SV=1	59.2068	19	31	19	353	39.698	6.55	108.5	109.6	108.9	88.3	95.1	89.6
A0A0J4XAA2	SM87_04594	Oxidoreductase YdhF OS=Klebsiella pneumoniae GN=SM87_04594 PE=4 SV=1	57.3826	11	25	2	298	33.687	6.65	71.9	75.7	80.2	120.4	131.6	120.2
A0A1S0W8A5	argD	Acetylornithine/succinyldiaminopimelate aminotransferase OS=Klebsiella pneumoniae GN=argD PE=3 SV=1	48.2759	12	19	1	406	43.586	6.57	99.8	107.8	103.9	96.2	94.3	98
C8T1D6	ygbF	Cell division coordinator CpoB OS=Klebsiella pneumoniae subsp. rhinoscleromatis ATCC 13884 GN=ygbF PE=3 SV=1	45.4545	11	26	11	264	28.184	8.69	100.1	102.3	104	100.4	95.6	97.7
A0A060VNR6	paaB	PaaB protein OS=Klebsiella pneumoniae GN=paaB PE=4 SV=1	63.8655	8	40	3	119	13.453	8.05	114.1	114	108.2	83.6	97.7	82.3
A0A168NXI4	yciE_1	Ferritin-like domain-containing protein OS=Klebsiella pneumoniae GN=yciE_1 PE=4 SV=1	48.2143	10	38	9	168	18.951	6.25	113.2	103.9	103.8	87.3	98.2	93.7
A0A0E1CMS9	KPNJ1_04102	Sugar-binding protein OS=Klebsiella pneumoniae 30660/NJST258_1 GN=KPNJ1_04102 PE=4 SV=1	46.1059	10	25	10	321	34.628	6.62	121.4	108.2	103	87.6	92.1	87.7
R4YBV8	KPR_0940	UPF0246 protein KPR_0940 OS=Klebsiella pneumoniae subsp. rhinoscleromatis SB3432 GN=KPR_0940 PE=3 SV=1	59.5331	12	26	12	257	29.528	6.96	95.4	93	92.5	108.2	104.7	106.3
A0A1W1K6J8	ybhB	YbhB OS=Klebsiella pneumoniae GN=ybhB PE=4 SV=1	56.962	7	36	7	158	16.911	5.43	113.6	118.7	117.7	83.3	83.9	82.9
A0A0E1C6W7	xylB	Xylulose kinase OS=Klebsiella pneumoniae 30660/NJST258_1 GN=xylB PE=3 SV=1	38.4298	13	22	13	484	51.926	6.07	101.6	91	88.1	104	109.9	105.5
A0A2G4Y766	CQB04_26670	Porin OmpS2 OS=Klebsiella pneumoniae GN=CQB04_26670 PE=4 SV=1	27.0833	7	108	1	384	42.621	4.93	42.1	142.2	92.4	158.6	52.5	112.2
A0A1W1KPJ1	rsmB	Ribosomal RNA small subunit methyltransferase B OS=Klebsiella pneumoniae GN=rsmB PE=3 SV=1	31.5545	9	19	2	431	48.451	8.03	98.8	99.6	105.6	100.2	110.5	85.3
Q5XL46	wcaG	GDP-L-fucose synthase OS=Klebsiella pneumoniae GN=wcaG PE=3 SV=1	65.2695	15	39	9	334	37.927	7.3	140.3	137.4	138	58.5	68.1	57.7
A0A1V0C0G6	AM447_00395	Protease OS=Klebsiella pneumoniae GN=AM447_00395 PE=4 SV=1	76.0638	9	35	4	188	20.286	5.5	120.5	127.2	130.8	70.5	67.8	83.4
A0A181RN58	zapD	Cell division protein ZapD OS=Klebsiella pneumoniae GN=zapD PE=3 SV=1	34.8178	7	21	7	247	28.635	6.9	106.3	103.8	103.7	96.5	99	90.7
V0AJJ8	HMPREF1619_04853	Aspartokinase OS=Klebsiella pneumoniae 909957 GN=HMPREF1619_04853 PE=3 SV=1	34.7439	11	19	11	449	48.401	5.34	96	96.9	95.5	99.3	106.7	105.5
A0A1S8YDV0	BU230_25555	OmpA family lipoprotein OS=Klebsiella pneumoniae GN=BU230_25555 PE=3 SV=1	49.0909	6	12	6	220	22.371	9.74	95.1	94.3	94.6	105.4	106	104.5
A0A2G8AI61	C630_16710	Ethanolamine utilization protein EutM OS=Klebsiella pneumoniae subsp. pneumoniae KpO3210 GN=C630_16710 PE=4 SV=1	73.4043	6	18	5	94	9.62	7.52	131	128.2	124	70	78.5	68.4
A0A165AJZ8	birA	Bifunctional ligase/repressor BirA OS=Klebsiella pneumoniae GN=birA PE=3 SV=1	64.0625	13	21	13	320	35.444	5.58	97.4	100.9	99.4	97.4	99.6	105.4
A0A2A2NJ17	CKJ89_24895	Protein tyrosine phosphatase OS=Klebsiella pneumoniae GN=CKJ89_24895 PE=3 SV=1	62.5	7	13	6	144	16.129	8	127.5	128.6	129.9	65.5	77.5	71
W1DS30	murC	UDP-N-acetylmuramate--L-alanine ligase OS=Klebsiella pneumoniae IS43 GN=murC PE=3 SV=1	33.5922	12	23	11	515	55.603	6.71	107.9	99.8	98.9	96.2	99.9	97.4
V0ALK1	HMPREF1619_04595	3,4-dihydroxyphenylacetate 2,3-dioxygenase OS=Klebsiella pneumoniae 909957 GN=HMPREF1619_04595 PE=4 SV=1	45.614	13	32	1	285	32.007	6.23	112.2	117.2	115.5	87	89.9	78.2
A0A1L5DZJ7	pcnB	Poly(A) polymerase I OS=Klebsiella pneumoniae GN=pcnB PE=3 SV=1	33.1897	13	21	13	464	53.689	9.72	99.4	96	96.2	102.7	104.5	101.2
W8UME4	tgt	Queuine tRNA-ribosyltransferase OS=Klebsiella pneumoniae 30684/NJST258_2 GN=tgt PE=3 SV=1	47.5703	17	32	17	391	44.13	6.34	100.2	94.6	93.6	100.3	108	103.3
A0A086ILQ7	argD	Acetylornithine/succinyldiaminopimelate aminotransferase OS=Klebsiella pneumoniae GN=argD PE=3 SV=1	48.2759	12	18	1	406	43.526	6.57	78.2	86.4	82	131.2	108	114.2
A0A0N9VHH2	sufA	Fe-S cluster assembly scaffold SufA OS=Klebsiella pneumoniae GN=sufA PE=3 SV=1	82.4	6	18	6	125	13.643	4.94	99.3	104	102.3	98.8	101.2	94.4
A0A060VLP4	AGG09_29440	Glyoxalase OS=Klebsiella pneumoniae GN=AGG09_29440 PE=4 SV=1	91.4062	9	22	1	128	14.474	6.16	77.6	84.3	84.1	125.6	112.2	116.2
A0A1S9BMT5	BU230_05915	Protein CapI OS=Klebsiella pneumoniae GN=BU230_05915 PE=4 SV=1	33.5329	9	26	2	334	37.567	6.13	112.2	138.7	138.1	65.3	64.7	80.9
W1BJB3	mglA	Galactose/methyl galactoside import ATP-binding protein MglA OS=Klebsiella pneumoniae IS22 GN=mglA PE=3 SV=1	34.8269	15	22	2	491	54.828	8.19	78.2	91	76.8	118.4	119.3	116.4
A0A0E1CC00	folE	GTP cyclohydrolase 1 OS=Klebsiella pneumoniae 30660/NJST258_1 GN=folE PE=3 SV=1	65.7658	11	23	11	222	24.948	8.05	97.8	96.8	97.1	102.3	104.8	101.2
A0A181VPV4	sdaB	L-serine ammonia-lyase OS=Klebsiella pneumoniae GN=sdaB PE=4 SV=1	39.1209	13	26	11	455	48.383	6.02	67.5	64	65.1	136.1	130.3	136.9
A0A1Y0Q3D4	B5K12_11015	ABC transporter substrate-binding protein OS=Klebsiella pneumoniae subsp. pneumoniae GN=B5K12_11015 PE=4 SV=1	64.9518	15	27	1	311	33.189	6.7	106.4	114.3	102.6	89.9	100.5	86.4
A0A168Y3C6	BU230_39625	Sugar ABC transporter OS=Klebsiella pneumoniae GN=BU230_39625 PE=4 SV=1	45.7627	13	23	13	354	37.6	8.81	107.7	99.1	100.9	94.7	103.3	94.3
A0A263KBS1	BB785_18910	Molybdenum cofactor biosynthesis protein B OS=Klebsiella pneumoniae GN=BB785_18910 PE=3 SV=1	67.6471	10	21	10	170	18.577	5.91	100.1	100.6	99.4	101.3	100.3	98.3
W1I2N5		Cystine ABC transporter, ATP-binding protein OS=Klebsiella pneumoniae IS39 PE=4 SV=1	41.7219	10	19	10	302	33.13	9.7	106.5	103.4	101	95.1	99.3	94.7
A0A0H3GK19	KPHS_00330	Putative acetyltransferase OS=Klebsiella pneumoniae subsp. pneumoniae (strain HS11286) GN=KPHS_00330 PE=4 SV=1	57.3574	12	25	12	333	37.341	6.67	97.4	97.2	99.6	97.6	107.1	101.1
W8UTH9	purD	Phosphoribosylamine--glycine ligase OS=Klebsiella pneumoniae 30684/NJST258_2 GN=purD PE=3 SV=1	46.4368	12	21	12	435	46.399	4.91	97.7	101.5	99.8	98.8	101.5	100.6
W9B186	glpX	Fructose-1,6-bisphosphatase OS=Klebsiella pneumoniae GN=glpX PE=3 SV=1	48.415	17	28	17	347	37.4	5.91	99.1	92.4	95	97.7	112.1	103.7
A0A0E1CLQ1	rbsK	Ribokinase OS=Klebsiella pneumoniae 30660/NJST258_1 GN=rbsK PE=3 SV=1	47.0968	9	18	9	310	32.188	5.38	93.5	90.7	88.8	106.6	113.9	106.6
A0A0E1CL90	mgsA	Methylglyoxal synthase OS=Klebsiella pneumoniae 30660/NJST258_1 GN=mgsA PE=3 SV=1	50.7692	4	13	4	195	21.823	7.61	121.4	99.5	94.7	96.7	98.3	89.3
A0A0J4MQB5	SM87_04963	RutC family protein YoaB OS=Klebsiella pneumoniae GN=SM87_04963 PE=4 SV=1	35.3846	5	15	5	130	14.34	4.94	109.1	109.8	110.3	93.1	88.6	89
A0A0E1CLW8	rlpA	Endolytic peptidoglycan transglycosylase RlpA OS=Klebsiella pneumoniae 30660/NJST258_1 GN=rlpA PE=3 SV=1	32.199	9	20	9	382	39.077	5.74	102.2	103.4	101.8	95.5	99.8	97.3
A2V7X8	wzi	Surface assembly of capsule OS=Klebsiella pneumoniae GN=wzi PE=4 SV=1	29.8539	11	26	2	479	53.059	5.83	113.6	111.4	127.8	76.1	91.5	79.6
A0A060VG94	ybjD	YbjD protein OS=Klebsiella pneumoniae GN=ybjD PE=4 SV=1	37.3451	15	23	15	565	65.304	8.12	109.2	108.2	108.8	89.3	93.1	91.3
A0A210VQG9	murF	UDP-N-acetylmuramoyl-tripeptide--D-alanyl-D-alanine ligase OS=Klebsiella pneumoniae GN=murF PE=3 SV=1	45.5752	14	31	2	452	47.494	5.95	107.1	109.3	102.7	101.1	91	88.7
A0A2D1J0X9	CR230_12630	UDP-N-acetylmuramoyl-tripeptide--D-alanyl-D-alanine ligase OS=Klebsiella pneumoniae GN=CR230_12630 PE=4 SV=1	45.5752	14	31	2	452	47.466	5.95	107.5	105.9	97.7	91.6	107.7	89.6
B5XYT5	glnQ	Glutamine ABC transporter, ATP-binding protein OS=Klebsiella pneumoniae (strain 342) GN=glnQ PE=4 SV=1	51.6667	9	25	2	240	26.646	7.25	94.4	99.4	97.6	104.1	105.5	99.1
A0A2D2PLJ6	CR231_07905	NAD(P)H nitroreductase OS=Klebsiella pneumoniae GN=CR231_07905 PE=4 SV=1	59.4595	11	30	2	185	20.448	7.25	71.8	78.6	75.9	124.4	120.5	128.7
H6U215	AM447_28340	Uncharacterized protein OS=Klebsiella pneumoniae GN=AM447_28340 PE=4 SV=1	42.3729	12	22	12	413	44.784	5.94	61.4	55.3	56.7	143.1	142.7	140.8
A0A060VI97	paaX	PaaX protein OS=Klebsiella pneumoniae GN=paaX PE=4 SV=1	41.8006	8	16	1	311	34.716	7.08	61.4	41.2	44.1	150.8	166.3	136.2
W1H652	infA	Translation initiation factor IF-1 OS=Klebsiella pneumoniae ISC21 GN=infA PE=3 SV=1	77.7778	5	30	5	72	8.244	9.25	98.2	101.6	101.3	101.1	98.3	99.5
W1AVK1	purH	Bifunctional purine biosynthesis protein PurH OS=Klebsiella pneumoniae IS22 GN=purH PE=3 SV=1	41.7671	15	28	1	498	53.933	5.43	95.5	103.9	103.4	108.2	113.4	75.7
A0A0H3GSG5	KPHS_35350	Putative enzyme OS=Klebsiella pneumoniae subsp. pneumoniae (strain HS11286) GN=KPHS_35350 PE=4 SV=1	58.7591	11	31	11	274	29.596	6	98.4	97.9	96.8	99.3	105.3	102.2
A0A0H3H3E1	garD	Galactarate dehydratase (L-threo-forming) OS=Klebsiella pneumoniae subsp. pneumoniae (strain HS11286) GN=garD PE=3 SV=1	39.7706	12	19	12	523	56.09	5.54	86.7	84	86.8	113.8	119.1	109.6
C8T3S7	rnc3	BMC domain protein OS=Klebsiella pneumoniae subsp. rhinoscleromatis ATCC 13884 GN=rnc3 PE=4 SV=1	84.375	6	17	6	96	9.832	6.54	65.2	68.8	69.8	128.8	140.5	127
A0A2D2EMZ0	CTI52_23680	Sugar phosphate isomerase/epimerase OS=Klebsiella pneumoniae GN=CTI52_23680 PE=4 SV=1	64.6259	14	38	14	294	34.095	5.57	101.3	97.4	99.4	101.2	100.6	100.1
A0A0G3NEJ9	AGG09_12010	Transcriptional regulator OS=Klebsiella pneumoniae GN=AGG09_12010 PE=4 SV=1	78.0105	13	33	1	191	21.743	5.16	108.3	109.7	108.8	92.2	94.1	86.9
A0A0H3GQN6	KPHS_35570	Glucose-1-phosphate thymidylyltransferase OS=Klebsiella pneumoniae subsp. pneumoniae (strain HS11286) GN=KPHS_35570 PE=3 SV=1	67.128	14	27	6	289	31.969	5.05	39.5	38.8	40.3	160.3	160.7	160.4
A0A291R9Q8	SB4816_00053	Putative hydrolase OS=Klebsiella pneumoniae GN=SB4816_00053 PE=4 SV=1	52.0979	11	21	11	286	31.62	5.54	46.9	47.1	49.8	153.6	152.3	150.4
B5XYH3	ubiD	3-octaprenyl-4-hydroxybenzoate carboxy-lyase OS=Klebsiella pneumoniae (strain 342) GN=ubiD PE=3 SV=1	44.7853	17	24	1	489	54.879	5.8	100.4	74.4	85.7	112.2	114.2	113
A0A1S0W7Y7	CTI55_01200	Cellulose biosynthesis protein BcsC OS=Klebsiella pneumoniae GN=CTI55_01200 PE=4 SV=1	26.2295	21	25	21	1159	127.043	6.4	97.6	95.5	96	99.4	112.4	99.2
A0A231WSQ4	ispF	2-C-methyl-D-erythritol 2,4-cyclodiphosphate synthase OS=Klebsiella pneumoniae GN=ispF PE=3 SV=1	74.8428	7	23	1	159	16.901	6.28	140	156.2	149.3	51.4	53.9	49.2
R4Y4H3	KPR_0261	Uncharacterized protein OS=Klebsiella pneumoniae subsp. rhinoscleromatis SB3432 GN=KPR_0261 PE=4 SV=1	71.0084	13	21	13	238	26.69	6.52	103.3	90.8	94.6	100.4	104.4	106.5
A0A2G8ARR0	C630_12195	Universal stress protein UspC OS=Klebsiella pneumoniae subsp. pneumoniae KpO3210 GN=C630_12195 PE=4 SV=1	84.507	10	22	2	142	15.717	6.86	84.3	89.9	93	116.7	104.9	111.1
A0A1C3T049	manC	Mannose-1-phosphate guanylyltransferase/mannose-6-phosphate isomerase OS=Klebsiella pneumoniae GN=manC PE=3 SV=1	19.7452	8	16	1	471	52.733	5.88	122.7	102.2	127.7	85.6	93.4	68.4
A0A1Y0Q1D9	B5K12_27325	NAD(P)H nitroreductase OS=Klebsiella pneumoniae subsp. pneumoniae GN=B5K12_27325 PE=4 SV=1	64.0553	12	33	12	217	23.911	5.83	93.4	92.2	91.3	107.7	108.1	107.3
W1HPR8	guaC	GMP reductase OS=Klebsiella pneumoniae IS39 GN=guaC PE=3 SV=1	66.2824	13	28	1	347	37.285	6.73	121.4	112.5	118.2	77.1	102.6	68.3
A0A0S3FHH4	hisC	Histidinol-phosphate aminotransferase OS=Klebsiella pneumoniae GN=hisC PE=3 SV=1	35.9773	10	22	10	353	38.681	5.03	96.7	94.5	96.2	101	108.7	102.9
A0A246R9F3	B5K12_06055	Octaprenyl diphosphate synthase OS=Klebsiella pneumoniae subsp. pneumoniae GN=B5K12_06055 PE=3 SV=1	34.9845	6	17	1	323	35.187	4.93	102.5	95.1	92.3	103	105.6	101.5
A0A2A2SU02	BVX91_13345	LacI family transcriptional regulator OS=Klebsiella pneumoniae GN=BVX91_13345 PE=4 SV=1	55.0595	13	28	1	336	37.408	6.32	110.8	115.9	114.9	81.6	89.8	87
B5XWN4	slyA	Transcriptional regulator SlyA OS=Klebsiella pneumoniae (strain 342) GN=slyA PE=3 SV=1	76.3889	9	39	9	144	16.538	7.05	98.1	101.5	102.1	101.2	98.3	98.9
W8UPU1	KPNJ2_05147	Class B acid phosphatase OS=Klebsiella pneumoniae 30684/NJST258_2 GN=KPNJ2_05147 PE=3 SV=1	47.541	8	34	8	244	26.843	7.4	101.2	98.9	101.2	99.1	101.4	98.2
A0A2G8AQR4	C630_10075	Cyclopropane-fatty-acyl-phospholipid synthase OS=Klebsiella pneumoniae subsp. pneumoniae KpO3210 GN=C630_10075 PE=4 SV=1	55.4974	19	36	19	382	44.108	6.67	106.6	101.3	99.4	96.9	97.9	97.8
W8UH67	KPNJ2_01620	Phosphoesterase OS=Klebsiella pneumoniae 30684/NJST258_2 GN=KPNJ2_01620 PE=3 SV=1	70.2128	9	22	1	188	20.664	6.52	146.9	153.9	142.9	47.1	54	55.1
A0A2G4YF04	CQB04_12785	Isoprenoid biosynthesis protein ElbB OS=Klebsiella pneumoniae GN=CQB04_12785 PE=4 SV=1	52.0737	9	27	3	217	22.881	4.89	130.2	125.7	121.5	69.3	84.6	68.8
A0A2G4Y6Z9	glf	UDP-galactopyranose mutase OS=Klebsiella pneumoniae GN=glf PE=4 SV=1	40.3646	13	23	1	384	44.429	6.52	38.5	34.8	36.9	156.9	176.8	156.1
A0A170IVL6	zntA	Lead, cadmium, zinc and mercury transporting ATPase OS=Klebsiella pneumoniae GN=zntA PE=3 SV=1	29.6196	13	18	13	736	77.093	6.01	107.1	106.5	107.3	86.2	102.5	90.4
A0A2G3RR41	CS332_19915	Transcriptional regulator TyrR OS=Klebsiella pneumoniae subsp. pneumoniae GN=CS332_19915 PE=4 SV=1	27.6803	14	30	1	513	57.516	6.02	103	91.6	93.6	102	111.1	98.8
A0A237W6Z8	CI704_15890	Propanediol utilization microcompartment protein PduB OS=Klebsiella pneumoniae subsp. pneumoniae GN=CI704_15890 PE=4 SV=1	50	12	21	12	270	27.877	5.33	123.6	122.1	121.6	73.3	85.3	74
A0A060VG45	ybiT	YbiT protein OS=Klebsiella pneumoniae GN=ybiT PE=4 SV=1	40.9982	19	28	19	561	63.25	5.06	90.2	89.6	89.8	109.9	112.8	107.7
W8UBF1	nfi	Endonuclease V OS=Klebsiella pneumoniae 30684/NJST258_2 GN=nfi PE=3 SV=1	66.3677	8	17	8	223	24.868	7.47	100.4	101.3	102.5	98.1	98.3	99.4
B5XTS0	malQ	4-alpha-glucanotransferase OS=Klebsiella pneumoniae (strain 342) GN=malQ PE=3 SV=1	44.8424	21	31	2	698	78.604	7.05	94.6	102.5	96.5	102.7	100.4	103.3
A0A1C3T132	wzc	Tyrosine-protein kinase OS=Klebsiella pneumoniae GN=wzc PE=4 SV=1	32.6389	18	26	0	720	79.396	6.52
A0A0C7KBH2	hns	DNA-binding protein OS=Klebsiella pneumoniae GN=hns PE=3 SV=1	64.3939	8	20	3	132	14.984	5.43	30.4	31.5	32.9	170.4	164.1	170.8
A0A060VJI6	KpST82_0388	Uncharacterized protein OS=Klebsiella pneumoniae GN=KpST82_0388 PE=4 SV=1	74.3961	13	32	1	207	23.343	5.01	92.3	88.1	89.5	112.4	104.6	113.1
C8T3R7	eutB	Ethanolamine ammonia-lyase, large subunit OS=Klebsiella pneumoniae subsp. rhinoscleromatis ATCC 13884 GN=eutB PE=4 SV=1	41.2664	15	26	15	458	50.163	5.08	72.2	67.6	72.9	125.1	136.1	126
B5XRS3	KPK_3071	Intracellular protease, PfpI family OS=Klebsiella pneumoniae (strain 342) GN=KPK_3071 PE=4 SV=1	71.9577	8	32	3	189	20.338	5.5	92	96.1	92.5	107.2	105.6	106.5
A0A2G9LDN6	CKQ90_18715	Universal stress protein UspF (Fragment) OS=Klebsiella pneumoniae GN=CKQ90_18715 PE=4 SV=1	68	8	51	1	125	13.912	4.89	85.8	96.1	94.3	93.1	121	109.7
A0A0H3GQX6	KPHS_05260	5-dehydro-2-deoxygluconokinase OS=Klebsiella pneumoniae subsp. pneumoniae (strain HS11286) GN=KPHS_05260 PE=4 SV=1	30.9262	14	22	14	637	70.68	5.97	94.6	87.9	90.6	106.9	109	110.9
A0A1Y0Q5H9	ispH	4-hydroxy-3-methylbut-2-enyl diphosphate reductase OS=Klebsiella pneumoniae subsp. pneumoniae GN=ispH PE=3 SV=1	36.0759	9	14	9	316	34.426	5.29	108.1	96.8	98.5	101.2	97.1	98.3
A0A168LFP7	rbtD	Ribitol 2-dehydrogenase OS=Klebsiella pneumoniae GN=rbtD PE=4 SV=1	61.0442	10	22	1	249	26.487	5.82	45	41.7	48.5	150.2	162.3	152.3
A0A2A2SX99	selA	L-seryl-tRNA(Sec) selenium transferase OS=Klebsiella pneumoniae GN=selA PE=3 SV=1	37.6623	13	19	13	462	50.56	6.99	100.5	101.4	100.1	96.2	101.8	100
A0A1S8YAT3	BU230_31750	Lactoylglutathione lyase OS=Klebsiella pneumoniae GN=BU230_31750 PE=3 SV=1	44.4444	7	31	7	135	14.831	4.81	105.2	105.5	103.2	96.3	93.7	96
C8TC78	rplW	50S ribosomal protein L23 OS=Klebsiella pneumoniae subsp. rhinoscleromatis ATCC 13884 GN=rplW PE=3 SV=1	63	7	36	7	100	11.206	9.94	98.4	100.9	101.1	103.9	95.9	99.8
A0A0E1CPC0	murG	UDP-N-acetylglucosamine--N-acetylmuramyl-(pentapeptide) pyrophosphoryl-undecaprenol N-acetylglucosamine transferase OS=Klebsiella pneumoniae 30660/NJST258_1 GN=murG PE=3 SV=1	47.7528	13	21	13	356	38.02	9.55	100.5	100.6	100.1	96.3	105.1	97.5
A0A1Y0PSG0	AN663_05305	GNAT family N-acetyltransferase OS=Klebsiella pneumoniae subsp. pneumoniae GN=AN663_05305 PE=4 SV=1	46.1078	5	11	5	167	18.534	4.64	95.8	92.7	96.6	102.5	114.7	97.7
R4Y476	yigP	YigP protein OS=Klebsiella pneumoniae subsp. rhinoscleromatis SB3432 GN=yigP PE=4 SV=1	45.5814	8	16	8	215	23.788	5.1	95.1	96.5	98.2	102.4	106	101.7
A0A060VEE1	pduP	PduP protein OS=Klebsiella pneumoniae GN=pduP PE=4 SV=1	38.0952	10	14	10	462	48.801	5.62	123.5	122.7	117.4	75.7	82.6	78.1
C8T3F7	yebR	GAF domain protein OS=Klebsiella pneumoniae subsp. rhinoscleromatis ATCC 13884 GN=yebR PE=4 SV=1	46.1957	6	13	6	184	20.022	4.75	105	99.5	98	104.6	97	95.8
A0A024GW39	glf	UDP-galactopyranose mutase OS=Klebsiella pneumoniae GN=glf PE=4 SV=1	42.1875	14	25	1	384	44.401	6.52	84.6	89.8	80.8	106.1	109.3	129.5
W8UMM4	aroA	3-phosphoshikimate 1-carboxyvinyltransferase OS=Klebsiella pneumoniae 30684/NJST258_2 GN=aroA PE=3 SV=1	53.7383	17	28	17	428	46.201	5.62	107.3	106.6	106.6	93.6	94.1	91.8
B5XUX8	gcvA	Glycine cleavage system transcriptional activator OS=Klebsiella pneumoniae (strain 342) GN=gcvA PE=4 SV=1	48.5246	11	20	11	305	34.277	8.97	112.9	102.5	102.7	91.7	97	93.3
W1HQ19	lexA	LexA repressor OS=Klebsiella pneumoniae IS39 GN=lexA PE=3 SV=1	70.7921	11	23	11	202	22.29	6.4	97.9	97.3	98.2	102.6	102.7	101.3
A0A1W1M445	artP	Arginine transport system ATP-binding protein OS=Klebsiella pneumoniae GN=artP PE=4 SV=1	37.5	5	15	1	264	29.303	7.24	113.4	109.7	101.2	94.4	98.3	83.1
A0A098C8S6	rimO	Ribosomal protein S12 methylthiotransferase RimO OS=Klebsiella pneumoniae GN=rimO PE=3 SV=1	49.2063	16	25	16	441	49.55	5.71	83.9	83.7	83.4	116.4	116.5	116.1
A0A1C3SZD8	wza	Integral outer membrane lipoprotein OS=Klebsiella pneumoniae GN=wza PE=4 SV=1	30.2387	7	22	1	377	41.597	6.4	83.8	90.3	87.9	115.9	106.7	115.4
W1BGX7		Histone acetyltransferase HPA2 and related acetyltransferases OS=Klebsiella pneumoniae IS22 PE=4 SV=1	41.0112	5	11	5	178	19.69	5.78	99.8	100.4	103	98.3	100.3	98.2
B5XTS2	nfuA	Fe/S biogenesis protein NfuA OS=Klebsiella pneumoniae (strain 342) GN=nfuA PE=3 SV=1	52.8796	8	29	8	191	20.991	4.6	107	104.6	107.2	94.2	96.2	90.8
W1HYH1		Maltose/maltodextrin ABC transporter, substrate binding periplasmic protein MalE OS=Klebsiella pneumoniae IS39 PE=4 SV=1	39.7727	11	23	11	440	47.617	5.9	93.9	89.8	88.5	107.9	112.3	107.5
A6T954	KPN_01694	Putataive short-chain dehydrogenase/reductase OS=Klebsiella pneumoniae subsp. pneumoniae (strain ATCC 700721 / MGH 78578) GN=KPN_01694 PE=4 SV=1	74.5902	12	17	1	244	25.574	6.57	82.7	103.8	104.5	113.6	105.5	90
A0A2D2GCC0	CTI55_20225	Hydrolase OS=Klebsiella pneumoniae GN=CTI55_20225 PE=4 SV=1	57.7465	8	16	8	213	23.647	5.83	119.3	121.8	120.1	76.8	81.2	80.8
A0A2G9LF67	CKQ90_12175	MBL fold metallo-hydrolase OS=Klebsiella pneumoniae GN=CKQ90_12175 PE=4 SV=1	48.8372	8	20	8	215	23.453	5.15	97.2	96.3	94	103.8	107	101.8
W1DSQ5		Ferredoxin--NADP(+) reductase OS=Klebsiella pneumoniae IS43 PE=4 SV=1	32.8467	10	29	10	411	45.073	8.63	107.2	106.2	106	92.5	93.8	94.3
A0A060VGJ1	putP	PutP protein OS=Klebsiella pneumoniae GN=putP PE=3 SV=1	14.1434	6	20	6	502	54.197	8.41	107.7	107.3	105.7	89	98.1	92.1
W9BJM0	btuB	Vitamin B12 transporter BtuB OS=Klebsiella pneumoniae GN=btuB PE=3 SV=1	29.902	12	18	1	612	68.079	5.44	99.7	85.2	84.4	99.9	113.2	117.4
A0A172W598	sul2	Dihydropteroate synthase OS=Klebsiella pneumoniae subsp. pneumoniae GN=sul2 PE=3 SV=1	50.9225	8	13	8	271	28.51	6.02	55.9	47.1	48.4	154.3	146.4	147.8
A6T7B0	ycdO	Uncharacterized protein OS=Klebsiella pneumoniae subsp. pneumoniae (strain ATCC 700721 / MGH 78578) GN=ycdO PE=4 SV=1	55.1724	15	27	15	377	41.23	5.57	91.1	90.1	89.7	109.4	111	108.7
A0A1W1KEH7	qorB	NmrA family protein OS=Klebsiella pneumoniae GN=qorB PE=4 SV=1	41.4894	7	16	2	282	29.032	5.54	89.3	84.1	89.5	106.9	118.3	111.9
A0A1Y0Q0E4	nudJ	Phosphatase NudJ OS=Klebsiella pneumoniae subsp. pneumoniae GN=nudJ PE=3 SV=1	84.2105	9	24	9	152	17.291	5.01	101.7	100.8	97.5	97.5	100.8	101.8
A0A2H2WFC3	BB785_17340	Uncharacterized protein OS=Klebsiella pneumoniae GN=BB785_17340 PE=4 SV=1	71.6667	11	44	1	180	21.116	6.86	86.7	85.7	84.7	105.2	117.9	119.6
A0A060VDW5	rffG	dTDP-glucose 4,6-dehydratase OS=Klebsiella pneumoniae GN=rffG PE=3 SV=1	49.8599	11	16	10	357	39.811	5.99	102.6	94.4	94.5	97.4	108.5	102.7
J2XAC4	lipA	Lipoyl synthase OS=Klebsiella pneumoniae subsp. pneumoniae DSM 30104 GN=lipA PE=3 SV=1	53.9394	15	30	15	330	37.179	8.13	90	88	86.5	110.4	115.1	110.1
A0A230ENK7	damX	Cell division protein DamX OS=Klebsiella pneumoniae GN=damX PE=3 SV=1	45.3271	12	38	1	428	45.704	6.99	92.5	97.8	94.7	99.6	113.2	102.2
A0A1Y0Q3D5	AN663_25505	ABC transporter ATP-binding protein OS=Klebsiella pneumoniae subsp. pneumoniae GN=AN663_25505 PE=4 SV=1	49.3506	16	28	16	308	34.56	8.05	101.4	104.1	103.4	99.4	96.8	94.9
A0A060VHV5	truD	tRNA pseudouridine synthase D OS=Klebsiella pneumoniae GN=truD PE=3 SV=1	41.2607	11	16	11	349	39.078	7.5	97.5	99.2	99	97	109.2	98
A0A1C3PIV4	yhdH	Quinone oxidoreductase OS=Klebsiella pneumoniae GN=yhdH PE=4 SV=1	41.5385	9	23	2	325	34.354	5.52	99.8	96.6	94.8	106.3	100	102.5
A0A170HVV0	xylB_1	Benzyl alcohol dehydrogenase OS=Klebsiella pneumoniae GN=xylB_1 PE=3 SV=1	57.1823	10	14	10	362	37.528	6.21	93.9	92.4	96.9	106.2	107.8	102.9
Q3MSF0	pspA	Phage shock protein OS=Klebsiella pneumoniae GN=pspA PE=4 SV=1	63.964	16	31	10	222	25.464	5.49	49.7	46.6	45.3	154.8	150.2	153.5
A0A060VE29	rimM	Ribosome maturation factor RimM OS=Klebsiella pneumoniae GN=rimM PE=3 SV=1	56.7568	8	15	8	185	20.969	4.82	92.3	90.3	87.9	110.7	112.1	106.6
A0A0C7KAX4	AM447_11400	6-N-hydroxylaminopurine resistance protein OS=Klebsiella pneumoniae GN=AM447_11400 PE=4 SV=1	56.6964	8	14	6	224	25.136	7.53	88.5	89.4	88.7	110.9	108.4	114.1
W9BDI0	BN49_4890	Uncharacterized protein OS=Klebsiella pneumoniae GN=BN49_4890 PE=4 SV=1	66.9421	4	15	1	121	12.327	5.29	44.9	41	49.4	154.3	161	149.4
A0A1W2F978	metL	Bifunctional aspartokinase/homoserine dehydrogenase OS=Klebsiella pneumoniae GN=metL PE=3 SV=1	36.5432	23	31	23	810	88.645	5.94	105.5	103.5	103.3	94.5	97.4	95.8
V0ALU8	HMPREF1619_03950	ADP compounds hydrolase NudE OS=Klebsiella pneumoniae 909957 GN=HMPREF1619_03950 PE=4 SV=1	64.8936	8	17	8	188	21.359	4.84	96.9	92.5	93.5	105.3	107.2	104.6
V0ALE5	HMPREF1619_03976	Glycerol-3-phosphate dehydrogenase OS=Klebsiella pneumoniae 909957 GN=HMPREF1619_03976 PE=3 SV=1	56.5737	23	38	2	502	56.651	7.68	90.4	91.6	89.8	109.2	108.9	110.1
W1HQA3	crl	Sigma factor-binding protein Crl OS=Klebsiella pneumoniae IS39 GN=crl PE=3 SV=1	81.0606	11	32	2	132	15.53	5.59	112.4	120.4	118.9	84.9	83.5	79.8
A0A1W1KKU5	acsC	Cellulose synthase operon protein C OS=Klebsiella pneumoniae GN=acsC PE=4 SV=1	15.6296	13	20	1	1350	144.858	6.86	130.2	99.5	106.9	90.1	80.4	92.9
W8UPP5	nrdR	Transcriptional repressor NrdR OS=Klebsiella pneumoniae 30684/NJST258_2 GN=nrdR PE=3 SV=1	56.3758	8	21	8	149	17.128	8.18	100.8	101.4	100.2	98.6	98.2	100.8
A0A1Y0Q2U7	AN663_18950	L-asparaginase 1 OS=Klebsiella pneumoniae subsp. pneumoniae GN=AN663_18950 PE=4 SV=1	32.1534	6	19	6	339	37.029	5.99	100.7	95.1	95.7	99.8	110.5	98.2
A0A2G8AFD1	C630_21210	Guanylate kinase OS=Klebsiella pneumoniae subsp. pneumoniae KpO3210 GN=C630_21210 PE=4 SV=1	56.5217	8	23	8	207	23.284	6.9	97	93.3	93.8	103.3	101.6	111
R4Y9T5	dbpA	ATP-dependent RNA helicase DbpA OS=Klebsiella pneumoniae subsp. rhinoscleromatis SB3432 GN=dbpA PE=3 SV=1	30.7036	9	12	9	469	50.532	8.15	105.4	95.3	95.5	99.2	103.7	100.8
A0A0U2HWR7	mph(A)	Macrolide 2'-phosphotransferase OS=Klebsiella pneumoniae GN=mph(A) PE=4 SV=1	31.9079	9	16	9	304	33.478	5.33	36.7	33.5	34.9	166.1	165.3	163.5
A0A0W8AKU8	mviM	Gfo/Idh/MocA family oxidoreductase OS=Klebsiella pneumoniae GN=mviM PE=4 SV=1	46.2541	10	19	10	307	34.178	7.27	93.2	93.2	92.8	103.7	108.3	108.7
A6T7T8	spy	Periplasmic protein OS=Klebsiella pneumoniae subsp. pneumoniae (strain ATCC 700721 / MGH 78578) GN=spy PE=4 SV=1	46.5839	11	49	11	161	18.002	9.45	113.4	115.3	114.5	87.7	83.7	85.5
W1BGL2		Outer membrane protein N OS=Klebsiella pneumoniae IS22 PE=4 SV=1	22.2812	7	77	2	377	41.18	4.72	97.1	109.2	96.5	92.7	99	105.5
A0A0J4XRH3	SM87_02177	Outer membrane protein S2 OS=Klebsiella pneumoniae GN=SM87_02177 PE=4 SV=1	27.8075	7	80	1	374	41.713	4.81
A0A0J4TV63	yjgA	UPF0307 protein BU230_22720 OS=Klebsiella pneumoniae GN=yjgA PE=3 SV=1	50.2732	11	26	1	183	21.319	5.35	88.3	96.9	95	104.1	115.2	100.4
A0A2A2NNL7	zapA	Cell division protein ZapA OS=Klebsiella pneumoniae GN=zapA PE=3 SV=1	41.5254	4	15	4	118	13.539	5.25	103.2	99.1	97.3	96.8	107.2	96.5
A0A169NVE8	era	GTPase Era OS=Klebsiella pneumoniae GN=era PE=3 SV=1	50.4983	11	16	11	301	33.894	6.98	87.5	88.4	89.7	112.4	109.8	112.2
W1I1T2		Pseudouridine synthase OS=Klebsiella pneumoniae IS39 PE=3 SV=1	37.2093	8	16	1	430	46.502	6.62	104.7	91.7	98.6	104.3	97	103.7
A0A193SEY6	gmd	GDP-mannose 4,6-dehydratase OS=Klebsiella pneumoniae GN=gmd PE=3 SV=1	40.8602	11	20	1	372	41.971	5.94	152.2	161.6	155.3	40.2	49	41.7
W1B353		RNA polymerase sigma factor RpoE OS=Klebsiella pneumoniae IS22 PE=3 SV=1	63.3508	9	18	9	191	21.706	5.49	102	104.7	103.1	95.3	98.1	96.8
A0A1W1JCV3	bcsG	Cellulose biosynthesis protein BcsG OS=Klebsiella pneumoniae GN=bcsG PE=4 SV=1	24.6869	6	12	6	559	61.85	6.96	98.9	95.9	96.2	103.4	103.7	101.9
A0A060VHG6	cyaY	Protein CyaY OS=Klebsiella pneumoniae GN=cyaY PE=3 SV=1	66.9811	6	15	6	106	12.241	4.49	98.8	102.1	99.5	100.2	100.2	99.1
A0A0C7K856	bglB	6-phospho-beta-glucosidase OS=Klebsiella pneumoniae GN=bglB PE=3 SV=1	46.5517	16	28	16	464	51.791	5.63	99.7	98.2	97.8	103	103.9	97.5
A0A1W1J4S9	garR_1	2-hydroxy-3-oxopropionate reductase OS=Klebsiella pneumoniae GN=garR_1 PE=4 SV=1	40.8935	10	23	1	291	30.691	5.16	94.5	100	98.2	103.4	104.3	99.6
A0A1S0WHY7	nqrC	Na(+)-translocating NADH-quinone reductase subunit C OS=Klebsiella pneumoniae GN=nqrC PE=3 SV=1	42.803	8	18	2	264	28.437	6.37	93.2	94.2	101.1	101.7	111.7	98.1
A0A060VPY3	KpST82_0379	Uncharacterized protein OS=Klebsiella pneumoniae GN=KpST82_0379 PE=4 SV=1	66.9421	4	14	2	121	12.422	6.48	124.5	133.1	129.8	75	69	68.6
A0A169XC74	speE	Polyamine aminopropyltransferase OS=Klebsiella pneumoniae GN=speE PE=3 SV=1	43.3566	6	18	6	286	32.188	5.97	97.9	98.9	99.9	101	100.5	102
A0A1V0C5B7	AM447_09870	Uncharacterized protein OS=Klebsiella pneumoniae GN=AM447_09870 PE=4 SV=1	35.6784	5	19	1	199	21.784	5.52	97.3	94.6	96.3	100	107.9	104
A0A0J4QT30	metJ	Met repressor OS=Klebsiella pneumoniae GN=metJ PE=3 SV=1	78.0952	9	25	9	105	12.159	5.31	98.6	101.7	99.7	102	97.6	100.4
A0A0G3N0Y9	B1727_23630	Uncharacterized protein OS=Klebsiella pneumoniae GN=B1727_23630 PE=4 SV=1	58.4746	6	16	6	118	12.57	9.17	131.2	138.2	135.5	63.9	68.2	63
A0A0C4KUT2	wbbZ	WbbZ protein OS=Klebsiella pneumoniae subsp. pneumoniae NTUH-K2044 GN=wbbZ PE=4 SV=1	55.7621	12	28	12	269	31.316	6.54	127.8	131.2	131.4	68.5	71.8	69.4
A0A0H3GZW1	KPHS_50430	Uncharacterized protein OS=Klebsiella pneumoniae subsp. pneumoniae (strain HS11286) GN=KPHS_50430 PE=4 SV=1	37.5242	13	20	13	517	58.577	6.95	94	84.2	83	122.6	105.2	111
A0A0H3GJ69	KPHS_11570	Acyl-CoA thioesterase II OS=Klebsiella pneumoniae subsp. pneumoniae (strain HS11286) GN=KPHS_11570 PE=4 SV=1	57.1429	13	28	13	287	32.024	6.54	101.4	101.6	100.6	98	102.9	95.5
A0A231WRP3	B1727_13135	Phosphoribulokinase OS=Klebsiella pneumoniae GN=B1727_13135 PE=3 SV=1	44.6367	10	17	10	289	32.356	6.67	98	99.1	97.9	101.8	103.6	99.6
A0A0E1CQG5	dusA	tRNA-dihydrouridine(20/20a) synthase OS=Klebsiella pneumoniae 30660/NJST258_1 GN=dusA PE=3 SV=1	57.5301	13	19	1	332	36.945	6.52	104.1	82.9	87	94.5	123	108.6
A0A060VEM2	yggN	YggN protein OS=Klebsiella pneumoniae GN=yggN PE=4 SV=1	68.2008	12	20	1	239	26.062	8.7	76.6	78.6	81	114.1	134.5	115.2
A0A0C7KHZ4	rbsK_2	Carbohydrate kinase OS=Klebsiella pneumoniae GN=rbsK_2 PE=4 SV=1	46.5672	12	19	1	335	36.705	6.28	80.2	73.8	78.5	119.1	125.8	122.6
A0A2G4Q2Q6	CS372_04555	Glycerol-3-phosphate dehydrogenase OS=Klebsiella pneumoniae GN=CS372_04555 PE=4 SV=1	58.3665	24	39	3	502	56.647	7.27	82	87.8	87.4	119.7	108	115.1
A0A2G3S2V6	CS332_00165	30S ribosomal protein S17 OS=Klebsiella pneumoniae subsp. pneumoniae GN=CS332_00165 PE=4 SV=1	32.1429	3	39	3	84	9.727	9.72	98.8	100.8	98.7	101.4	98.7	101.7
A0A1C3PID9	htpX_1	Protease HtpX OS=Klebsiella pneumoniae GN=htpX_1 PE=3 SV=1	21.4286	7	14	7	294	31.997	6.7	91.1	88	88.5	107.7	115.5	109.3
A0A2G8AJ59	C630_17835	Oxidative damage protection protein OS=Klebsiella pneumoniae subsp. pneumoniae KpO3210 GN=C630_17835 PE=4 SV=1	95.6044	11	37	11	91	10.912	6.29	104	105.3	104	96.7	95.4	94.6
A0A1Y0PVE6	AN663_06855	HTH-type transcriptional regulator GalR OS=Klebsiella pneumoniae subsp. pneumoniae GN=AN663_06855 PE=4 SV=1	39.9408	10	14	9	338	36.785	6.38	96	95.4	95	106.4	107.7	99.5
A0A1S0WGV5	SM57_00915	Soluble aldose sugar dehydrogenase YliI OS=Klebsiella pneumoniae GN=SM57_00915 PE=4 SV=1	35.7724	8	17	8	369	39.932	8.27	100.7	99.8	97.5	99.2	103.6	99.2
A0A210V1Y6	B4U21_25150	Uncharacterized protein (Fragment) OS=Klebsiella pneumoniae GN=B4U21_25150 PE=4 SV=1	78.5388	13	21	1	219	23.984	7.28	93	86.9	82.4	92.8	149.3	95.6
A0A0C7KEW5	ycjS_1	Oxidoreductase OS=Klebsiella pneumoniae GN=ycjS_1 PE=4 SV=1	56.6327	12	26	12	392	43.566	5.57	91.9	90.7	90.4	104.4	114.8	108
A0A235Q1I8	aas	Bifunctional protein Aas OS=Klebsiella pneumoniae subsp. pneumoniae GN=aas PE=3 SV=1	24.6175	13	17	13	719	80.209	9.42	98	95.8	96.8	100.3	108.4	100.7
A0A170XYU2	fecA_2	Fe(3+) dicitrate transport protein FecA OS=Klebsiella pneumoniae GN=fecA_2 PE=3 SV=1	34.1085	14	31	6	774	85.193	6.02	68.5	63.2	64.7	129.4	140.6	133.6
J2LNZ9	rlmJ	Ribosomal RNA large subunit methyltransferase J OS=Klebsiella pneumoniae subsp. pneumoniae DSM 30104 GN=rlmJ PE=3 SV=1	57.8616	15	28	15	318	36.126	9.13	92.4	97.3	98.6	104.8	102.4	104.5
W1BE73	rpsO	30S ribosomal protein S15 OS=Klebsiella pneumoniae IS22 GN=rpsO PE=3 SV=1	67.4157	8	67	8	89	10.203	10.46	96.4	99.4	99.6	103.6	95.6	105.6
A0A212NCV2	blaCTX-M-28	Beta-lactamase (Fragment) OS=Klebsiella pneumoniae GN=blaCTX-M-28 PE=3 SV=1	58.125	9	26	1	160	17.347	8.15	74.7	60.6	61.4	129	130.9	143.3
A0A0J4Y0C3	SM87_01735	Glucose-1-phosphatase OS=Klebsiella pneumoniae GN=SM87_01735 PE=4 SV=1	56.2963	8	26	1	135	14.962	7.97	104.5	107.9	99.3	99.7	95.8	92.8
V0AM83	HMPREF1619_03939	Glycerol dehydrogenase OS=Klebsiella pneumoniae 909957 GN=HMPREF1619_03939 PE=4 SV=1	28.6096	8	13	8	374	40.069	5.78	98.9	92.5	95.5	100.7	110.2	102.2
J2XCD6	UUU_04510	Phosphoserine phosphatase OS=Klebsiella pneumoniae subsp. pneumoniae DSM 30104 GN=UUU_04510 PE=4 SV=1	36.3636	9	20	9	330	35.887	6.11	98.1	94.6	94.8	104.2	105.9	102.4
A0A143T1B8	pduD	Adenosylcobalamin-dependent diol dehydratase medium subunit OS=Klebsiella pneumoniae GN=pduD PE=4 SV=1	45.8515	8	16	8	229	24.378	8.1	117.6	117	117.1	75.4	98.2	74.7
R4YBD9	rpsN	30S ribosomal protein S14 OS=Klebsiella pneumoniae subsp. rhinoscleromatis SB3432 GN=rpsN PE=3 SV=1	46.5347	6	38	6	101	11.571	11.34	111.7	104.1	102.7	94.7	93.6	93.3
A0A0J4T4P7	bhsA_5	Exported protein OS=Klebsiella pneumoniae GN=bhsA_5 PE=4 SV=1	58.427	6	31	6	89	9.575	9.5	90.6	90.6	90	114	105.6	109.3
A0A0E1C6S6	KPNJ1_00144	3-deoxy-D-manno-octulosonic-acid transferase OS=Klebsiella pneumoniae 30660/NJST258_1 GN=KPNJ1_00144 PE=4 SV=1	37.7358	12	16	12	424	47.626	9.58	104.1	101	101.6	99.7	98.4	95.2
A0A060VIT1	purM	Phosphoribosylformylglycinamidine cyclo-ligase OS=Klebsiella pneumoniae GN=purM PE=3 SV=1	39.7101	8	19	3	345	36.67	5	112.4	101.8	99.8	96.4	100.8	88.8
A0A0J4QUR8	xseB	Exodeoxyribonuclease 7 small subunit OS=Klebsiella pneumoniae GN=xseB PE=3 SV=1	73.75	4	7	4	80	8.819	4.21	97.9	100.5	99	99.2	109.8	93.5
A0A170PC47	dkgB	2,5-didehydrogluconate reductase B OS=Klebsiella pneumoniae GN=dkgB PE=4 SV=1	63.6704	15	24	4	267	29.294	5.16	104.9	104.1	103	89	91.7	107.3
A6TFP9	spoT	(P)ppGpp synthetase II OS=Klebsiella pneumoniae subsp. pneumoniae (strain ATCC 700721 / MGH 78578) GN=spoT PE=3 SV=1	25.6374	14	21	14	706	79.442	8.73	102.3	95.5	98.4	98.2	104.8	100.8
W8UHE7	KPNJ2_02544	Conserved protein/domain typically associated with flavoprotein oxygenase, DIM6/NTAB family protein OS=Klebsiella pneumoniae 30684/NJST258_2 GN=KPNJ2_02544 PE=4 SV=1	51.6279	8	15	8	215	23.707	6.39	105.1	101.4	100	95.9	103.8	93.8
A0A0C7KGH6	ubiH	2-octaprenyl-6-methoxyphenol hydroxylase OS=Klebsiella pneumoniae GN=ubiH PE=4 SV=1	40.8163	10	15	10	392	42.092	8.92	90.4	93.4	91.8	100.9	114.5	108.9
A0A0C7KBC0	fsaB	Fructose-6-phosphate aldolase OS=Klebsiella pneumoniae GN=fsaB PE=3 SV=1	55.9091	10	17	1	220	23.309	5.22	116	125.8	123	82.7	72.9	79.6
W1DKJ9	lsrG	(4S)-4-hydroxy-5-phosphonooxypentane-2,3-dione isomerase OS=Klebsiella pneumoniae IS43 GN=lsrG PE=3 SV=1	94.898	9	32	1	98	11.482	5.49	87.6	73.7	74.6	113.3	132.7	118.1
A0A1W1J6F8	rfbD	UDP-galactopyranose mutase OS=Klebsiella pneumoniae GN=rfbD PE=4 SV=1	39.0625	12	22	1	384	44.398	6.2	114	98.5	90	94.8	109.6	93.2
A0A1W2E3W5	elbB	Glyoxalase OS=Klebsiella pneumoniae GN=elbB PE=3 SV=1	28.5714	5	24	1	217	22.953	4.84	94.6	103.9	105.1	109.5	97.6	89.2
Q5XL56		Uncharacterized protein OS=Klebsiella pneumoniae PE=4 SV=1	23.6111	10	25	1	504	55.77	5.71	126.7	127.3	122.3	69.9	80.4	73.2
A0A218N588	KP64477b_00013	Kinase OS=Klebsiella pneumoniae GN=KP64477b_00013 PE=4 SV=1	48.0962	21	28	1	499	56.87	8.18	67.9	56.9	64.8	133.4	137.4	139.4
B5XST8	yfiA	Ribosomal subunit interface protein OS=Klebsiella pneumoniae (strain 342) GN=yfiA PE=4 SV=1	71.5789	4	54	4	95	10.739	7.64	84.8	90.1	90.2	111.6	112	111.3
A0A1C1NTE4	dusA	tRNA-dihydrouridine(20/20a) synthase OS=Klebsiella pneumoniae GN=dusA PE=3 SV=1	57.5301	13	19	1	332	36.917	6.52	120.6	83	80.1	97.3	110.7	108.3
A0A2G3S2A4	CS332_02380	DUF1479 domain-containing protein OS=Klebsiella pneumoniae subsp. pneumoniae GN=CS332_02380 PE=4 SV=1	11.6667	4	21	1	420	47.169	5.33	114.7	121	119	85	80.7	79.6
A0A2D2IP99	CR231_22365	2,3-bisphosphoglycerate-independent phosphoglycerate mutase OS=Klebsiella pneumoniae GN=CR231_22365 PE=4 SV=1	49.0272	15	29	15	514	55.971	5.5	94.1	92.1	92.4	104.8	110.7	105.8
W9BGB2	BN49_2441	Uncharacterized protein OS=Klebsiella pneumoniae GN=BN49_2441 PE=4 SV=1	39.8287	13	21	13	467	52.93	8.68	96.4	97.7	98.1	103.6	105.7	98.4
A0A060VIQ2	yqgE	UPF0301 protein KpST82_3974 OS=Klebsiella pneumoniae GN=yqgE PE=3 SV=1	57.754	7	17	7	187	20.789	5.21	94.7	90.5	92.2	101.4	120.9	100.4
A0A2G4YFN9	CQB04_15120	Glyoxalase/bleomycin resistance/dioxygenase family protein OS=Klebsiella pneumoniae GN=CQB04_15120 PE=4 SV=1	91.4062	9	21	1	128	14.488	6.16	155	176.5	166.6	34.6	38.7	28.6
A0A235VMC4	AN663_05325	Uncharacterized protein OS=Klebsiella pneumoniae subsp. pneumoniae GN=AN663_05325 PE=4 SV=1	60.9302	9	14	9	215	23.38	8.06	107.4	108.4	107.5	91.5	95.6	89.6
A0A0T5IFP7	cobQ	Cobyric acid synthase OS=Klebsiella pneumoniae GN=cobQ PE=3 SV=1	33.5306	14	24	14	507	55.088	6.19	78.1	71.6	73.6	124.6	128.7	123.4
A0A236BE19	crl	Sigma factor-binding protein Crl OS=Klebsiella pneumoniae subsp. pneumoniae GN=crl PE=3 SV=1	81.0606	11	30	2	132	15.472	5.91	34.8	26.2	33.5	168.1	162.6	174.6
A0A060VHM5	dat	Dat protein OS=Klebsiella pneumoniae GN=dat PE=3 SV=1	38.2231	12	19	12	484	52.335	6.87	67	65	65.8	136.4	133.5	132.3
A0A060VMY1	lrp	Lrp protein OS=Klebsiella pneumoniae GN=lrp PE=4 SV=1	60.3659	13	42	13	164	18.859	8.78	103.2	101.6	101.1	97.8	99.4	96.8
A0A1B2ZY61	BCB67_17205	Endopeptidase La OS=Klebsiella pneumoniae GN=BCB67_17205 PE=3 SV=1	27.5214	11	21	11	585	64.982	4.61	98	92.3	93.2	104	108.7	103.9
A0A2A5IF85	radA	DNA repair protein RadA OS=Klebsiella pneumoniae subsp. pneumoniae GN=radA PE=3 SV=1	35.6522	11	13	11	460	49.382	7.47	97.5	95.3	97.7	104.4	108.9	96.3
A0A0J4QTH8	cysH	Phosphoadenosine phosphosulfate reductase OS=Klebsiella pneumoniae GN=cysH PE=3 SV=1	48.7705	10	15	10	244	27.798	5.9	93.2	92.3	94.9	102.8	107.1	109.6
A0A2G4YG08	paaX	Phenylacetic acid degradation operon negative regulatory protein PaaX OS=Klebsiella pneumoniae GN=paaX PE=4 SV=1	33.119	6	16	2	311	34.78	6.8	138.9	138.4	134	60.5	66.9	61.3
A0A164KY27	galM	Aldose 1-epimerase OS=Klebsiella pneumoniae GN=galM PE=3 SV=1	66.2824	15	26	1	347	38.243	5.15	82.6	85.7	96.1	102.8	126.7	106
A0A0C7KKJ6	ylmA	Putative ABC transporter ATP-binding protein YlmA OS=Klebsiella pneumoniae GN=ylmA PE=4 SV=1	43.8776	15	21	15	490	53.793	5.96	105	101.2	100.3	95	101.1	97.5
R4YA26	fnr	Fnr protein OS=Klebsiella pneumoniae subsp. rhinoscleromatis SB3432 GN=fnr PE=4 SV=1	13.3858	2	6	2	254	28.427	8.32	86.3	86.5	86.6	112.6	113.7	114.1
A0A1C3SZS8	ugd	UDP-glucose 6-dehydrogenase OS=Klebsiella pneumoniae GN=ugd PE=3 SV=1	27.3196	9	25	1	388	43.624	5.38	103.7	100.4	96.1	91.8	100.7	107.4
A0A068SI57	ybhK	Putative gluconeogenesis factor OS=Klebsiella pneumoniae GN=ybhK PE=3 SV=1	34.5515	8	14	8	301	32.559	5.68	95.1	97.6	97.4	102.7	104.8	102.4
A0A1V0C269	AM447_03840	Galactose-1-phosphate uridylyltransferase OS=Klebsiella pneumoniae GN=AM447_03840 PE=3 SV=1	38.7931	9	18	2	348	39.582	6.16	110.8	114.2	115.3	91.4	84.6	83.7
A0A0N9UJ46	hisB	Histidine biosynthesis bifunctional protein HisB OS=Klebsiella pneumoniae GN=hisB PE=3 SV=1	33.8028	11	21	1	355	40.142	5.77	90.4	97.8	94.9	107	106.9	103
A0A1W1JG31	tcyP	L-cystine uptake protein TcyP OS=Klebsiella pneumoniae GN=tcyP PE=3 SV=1	18.3585	6	12	1	463	48.819	9.48	75.2	82.6	80.2	116.3	114.9	130.8
A0A2G4YAE3	glnQ	Glutamine ABC transporter ATP-binding protein OS=Klebsiella pneumoniae GN=glnQ PE=4 SV=1	51.6667	8	22	1	240	26.674	7.25	124.1	132.3	143.6	68.2	77	54.9
A0A2D2GG95	CTI57_26790	Kinase OS=Klebsiella pneumoniae GN=CTI57_26790 PE=4 SV=1	49.8998	21	28	1	499	56.895	8.18	93.6	93.8	86.7	103.5	121.5	100.9
V0ARN2	HMPREF1619_05569	Transcriptional regulator, TetR family OS=Klebsiella pneumoniae 909957 GN=HMPREF1619_05569 PE=4 SV=1	63.6364	8	14	8	198	22.387	7.5	118.9	92.4	93.7	93.3	104.4	97.4
A0A2G8AKB3	C630_13645	Cytidine deaminase OS=Klebsiella pneumoniae subsp. pneumoniae KpO3210 GN=C630_13645 PE=4 SV=1	38.0952	7	20	1	294	31.473	5.91	109.7	121.1	124	78.8	92.2	74.3
A0A2A5PPS5	CP995_20595	Hypoxanthine phosphoribosyltransferase OS=Klebsiella pneumoniae GN=CP995_20595 PE=3 SV=1	79.3478	11	35	11	184	20.731	5.44	98.7	100.5	102.2	102.2	97.7	98.7
W1DYX2		FIG138056: a glutathione-dependent thiol reductase OS=Klebsiella pneumoniae IS46 PE=3 SV=1	50.4274	5	13	5	117	13.468	7.3	103.5	103.1	104.5	96.9	94.8	97.1
A0A0J4XR79	SM87_02016	Dicarboxylate/amino acid:cation (Na+ or H+) symporter family transporter OS=Klebsiella pneumoniae GN=SM87_02016 PE=3 SV=1	18.3585	6	12	1	463	48.846	9.45	103.7	120.8	109.6	88.6	90.6	86.7
A0A2A2NF13	CKJ89_39945	Uncharacterized protein (Fragment) OS=Klebsiella pneumoniae GN=CKJ89_39945 PE=4 SV=1	98.3051	2	11	1	59	6.193	4.46
A0A1C3PTZ6	ilvI_1	Acetolactate synthase OS=Klebsiella pneumoniae GN=ilvI_1 PE=3 SV=1	36.2369	14	23	14	574	63.007	5.69	102.3	99.6	101.1	93.2	110.1	93.7
A0A1W1J9Y9	entF	Enterobactin synthase subunit F OS=Klebsiella pneumoniae GN=entF PE=4 SV=1	14.4625	10	13	1	1293	140.736	5.31	117.7	90.8	90.4	84.8	121.7	94.6
W1I1K9		Regulatory protein, GntR:Bacterial regulatory protein, GntR OS=Klebsiella pneumoniae IS39 PE=4 SV=1	56.4315	10	18	10	241	27.423	6.7	85.5	86.2	86.6	102.5	128.3	110.9
A0A098CGR3	AGG09_18115	Pyridoxal phosphate homeostasis protein OS=Klebsiella pneumoniae GN=AGG09_18115 PE=3 SV=1	64.3777	10	18	10	233	25.335	6.89	104.8	96.4	97.8	98	105.5	97.5
R9S6Y5	parA	Plasmid segregation protein ParM OS=Klebsiella pneumoniae GN=parA PE=4 SV=1	35	9	17	9	320	35.743	5.44	56.7	47.5	50.7	144.1	152.6	148.5
A0A1B3A362	pdxK	Pyridoxal kinase OS=Klebsiella pneumoniae GN=pdxK PE=3 SV=1	47.5694	9	12	9	288	31.257	5.07	106.6	101.9	103.1	94	101.1	93.3
A0A1V0C0L2	AM447_00535	Dipeptide epimerase OS=Klebsiella pneumoniae GN=AM447_00535 PE=3 SV=1	45.1713	11	17	2	321	34.692	5.1	84.5	79.4	82.1	119.8	123.4	110.9
A0A0C7KMC1	rob_2	Right origin-binding protein OS=Klebsiella pneumoniae GN=rob_2 PE=4 SV=1	44.9827	11	29	11	289	33.355	8.25	103	104.7	104.5	95	96.8	96
A6TB72	yedD	Uncharacterized protein OS=Klebsiella pneumoniae subsp. pneumoniae (strain ATCC 700721 / MGH 78578) GN=yedD PE=1 SV=1	50	5	18	1	144	15.822	8.28	103.6	112.2	112.5	90	89.9	91.7
A0A2G4YMH9	CQB04_02815	DUF4156 domain-containing protein OS=Klebsiella pneumoniae GN=CQB04_02815 PE=4 SV=1	63.2479	3	17	1	117	12.094	5.96	75.8	84.7	81.6	121.8	118.5	117.6
W8VID1	KPNJ2_05154	Uncharacterized protein OS=Klebsiella pneumoniae 30684/NJST258_2 GN=KPNJ2_05154 PE=4 SV=1	58.8235	8	23	8	170	19.744	7.61	107.2	91.7	92.3	105.6	99.4	103.8
A0A1B2ZNL6	BCB67_10875	Phosphoesterase OS=Klebsiella pneumoniae GN=BCB67_10875 PE=3 SV=1	65.5738	8	19	1	183	20.091	6.52	146.1	160.5	147	34.7	69.4	42.2
A0A097J9H8	blaDHA-15	Beta-lactamase OS=Klebsiella pneumoniae GN=blaDHA-15 PE=3 SV=1	46.1741	11	19	11	379	41.197	9.01	53.6	49.1	52.3	144.4	154.8	145.8
A0A0E1H1E3	nhoA	N-hydroxyarylamine O-acetyltransferase OS=Klebsiella pneumoniae GN=nhoA PE=3 SV=1	68.3274	14	26	4	281	32.093	6.44	96.4	95.4	97.9	101	107.7	101.6
A0A1W1JD04	fabG_12	Oxidoreductase OS=Klebsiella pneumoniae GN=fabG_12 PE=4 SV=1	52.381	10	18	2	252	26.612	5.69	84.8	80.3	79.3	121.1	120	114.5
A0A2D2PU74	CR231_22280	Glutathione S-transferase OS=Klebsiella pneumoniae GN=CR231_22280 PE=4 SV=1	45.0495	9	22	3	202	22.316	8.15	94.3	93.1	91.6	97.5	119.1	104.4
A0A060VLK7	yihD	YihD protein OS=Klebsiella pneumoniae GN=yihD PE=4 SV=1	44.1558	9	21	9	154	17.93	8.91	90	94.5	95.2	107.2	104.3	108.9
A0A2D2PT56	CR231_20505	Octaprenyl diphosphate synthase OS=Klebsiella pneumoniae GN=CR231_20505 PE=4 SV=1	34.9845	6	14	1	323	35.174	4.84	68.8	61.5	66	140.1	143	120.6
D4HQF6	pKF94-033	Mediator of plasmid stability OS=Klebsiella pneumoniae GN=pKF94-033 PE=4 SV=1	35.1852	9	15	9	324	35.605	5.17	46.9	40.3	43.6	158.4	157.4	153.4
A0A0E1CJ68	KPNJ1_02792	Acetyl-CoA acetyltransferase OS=Klebsiella pneumoniae 30660/NJST258_1 GN=KPNJ1_02792 PE=3 SV=1	31.5657	7	15	7	396	42.281	7.15	97.7	87.7	89.6	105.2	105.1	114.6
A0A0C7KJF6	oppA_1	Periplasmic oligopeptide-binding protein OS=Klebsiella pneumoniae GN=oppA_1 PE=4 SV=1	34.1818	11	18	10	550	61.441	7.12	77.8	75.9	76.6	119.1	127.7	122.9
A0A210UN97	B4U21_36720	Uncharacterized protein OS=Klebsiella pneumoniae GN=B4U21_36720 PE=4 SV=1	37.859	9	18	9	383	41.346	5.06	82.2	51.1	50.9	140.1	137.4	138.3
A0A060VJY1	dhaL	DhaL protein OS=Klebsiella pneumoniae GN=dhaL PE=4 SV=1	72.8571	11	22	11	210	22.77	5.81	89	88.3	87.8	105.3	127.1	102.5
A0A1B2ZLH5	BCB67_06115	6-phosphogluconate dehydrogenase OS=Klebsiella pneumoniae GN=BCB67_06115 PE=4 SV=1	40.8935	10	22	1	291	30.647	5.26	115.8	121.2	119.2	75.2	90.8	77.8
W1HT40		D-alanyl-D-alanine carboxypeptidase OS=Klebsiella pneumoniae IS39 PE=4 SV=1	40.3189	10	15	10	439	47.379	8.9	102	99	99.2	94.9	109.3	95.6
W8UH29	KPNJ2_01580	Lipoprotein OS=Klebsiella pneumoniae 30684/NJST258_2 GN=KPNJ2_01580 PE=4 SV=1	36.4912	8	24	8	285	31.679	5.86	90.8	91.6	91.7	106.9	111.9	107
W8UY54	KPNJ2_02067	Outer membrane protein slp OS=Klebsiella pneumoniae 30684/NJST258_2 GN=KPNJ2_02067 PE=4 SV=1	40	7	17	7	215	23.399	9.89	98.7	96.9	97.4	100.4	106.4	100.2
A0A2G8AKI3	C630_13340	DNA-3-methyladenine glycosylase 2 OS=Klebsiella pneumoniae subsp. pneumoniae KpO3210 GN=C630_13340 PE=4 SV=1	50.7092	12	19	1	282	30.862	8.02	108.8	90.4	104.7	88.6	111.5	96
A0A0C7K6P7	rbn	Ribonuclease BN OS=Klebsiella pneumoniae GN=rbn PE=3 SV=1	40.1961	8	15	8	306	33.48	6.52	98.5	99.3	99	102.4	99.7	101
A0A1C3QCZ2	ymdB	O-acetyl-ADP-ribose deacetylase OS=Klebsiella pneumoniae GN=ymdB PE=3 SV=1	69.1429	8	15	3	175	18.417	6.15	113.8	95	100.6	99	95.5	96.2
A0A2A5ILX7	CI704_05660	dTDP-4-dehydrorhamnose reductase OS=Klebsiella pneumoniae subsp. pneumoniae GN=CI704_05660 PE=3 SV=1	55.7432	12	22	2	296	32.181	6.05	37.9	30.4	33.5	165	167.2	166.1
A0A1B2ZXE1	BCB67_03235	Aldose 1-epimerase OS=Klebsiella pneumoniae GN=BCB67_03235 PE=3 SV=1	66.2824	15	26	1	347	38.198	5.22	117.4	128.8	109.8	66.2	94.3	83.5
W1HVQ3		SSU ribosomal protein S19p (S15e) OS=Klebsiella pneumoniae IS39 PE=3 SV=1	71.4286	3	23	1	49	5.425	10.11	97.4	92.1	93.9	105.9	113.5	97.1
A0A060VF55	aroM	AroM protein OS=Klebsiella pneumoniae GN=aroM PE=4 SV=1	32.7434	5	10	5	226	24.806	5.02	94.5	97.9	97.6	105.1	102.4	102.6
A0A1Y0Q393	B5K12_15130	3,4-dihydroxyphenylacetate 2,3-dioxygenase OS=Klebsiella pneumoniae subsp. pneumoniae GN=B5K12_15130 PE=4 SV=1	43.8596	12	28	2	285	32.049	6.34	150.7	158.2	147.5	46.6	49.4	47.6
A0A0E1CC23	KPNJ1_00548	Toluene transport system Ttg2C protein OS=Klebsiella pneumoniae 30660/NJST258_1 GN=KPNJ1_00548 PE=4 SV=1	65.4255	8	20	6	188	20.261	5.08	89.2	93.9	91.8	112.6	113.4	99.1
C8T3H8	hexR	Transcriptional regulator, RpiR family OS=Klebsiella pneumoniae subsp. rhinoscleromatis ATCC 13884 GN=hexR PE=4 SV=1	34.8837	7	10	7	301	33.297	6.01	98.5	96.1	95	97.6	110.3	102.4
A0A060VK17	cobU	Bifunctional adenosylcobalamin biosynthesis protein OS=Klebsiella pneumoniae GN=cobU PE=3 SV=1	27.0718	2	7	2	181	19.687	5.35	93	90.2	97.5	106.3	120.1	93
A6TAX3	minC	Probable septum site-determining protein MinC OS=Klebsiella pneumoniae subsp. pneumoniae (strain ATCC 700721 / MGH 78578) GN=minC PE=3 SV=1	48.7069	9	23	9	232	24.901	6.64	103	104.5	105.3	95.9	97.2	94
W8UP49	diaA	DnaA initiator-associating protein DiaA OS=Klebsiella pneumoniae 30684/NJST258_2 GN=diaA PE=3 SV=1	54.8077	6	11	6	208	22.355	5.38	93.9	91.8	92.9	105	105.4	111.1
A0A060VDG8	pdhR	PdhR protein OS=Klebsiella pneumoniae GN=pdhR PE=4 SV=1	46.7153	8	21	8	274	31.549	6.55	97.6	94.8	91.8	101.3	113	101.5
A0A1B2ZZ05	BCB67_22280	Uncharacterized protein OS=Klebsiella pneumoniae GN=BCB67_22280 PE=4 SV=1	63.0435	8	15	8	230	25.165	5.08	102.3	97	99.9	98	100.9	101.9
A0A060VLC9	yxeP_6	Amidohydrolase OS=Klebsiella pneumoniae GN=yxeP_6 PE=4 SV=1	24.1558	6	9	6	385	41.202	5.87	99.5	98.2	97.3	93.2	109.5	102.3
A0A0J5B156	lpxD	UDP-3-O-(3-hydroxymyristoyl)glucosamine N-acyltransferase OS=Klebsiella pneumoniae GN=lpxD PE=3 SV=1	43.1085	9	17	1	341	35.984	6.07	124.3	103.8	112.6	76.8	97.2	85.3
A6T634	entF	ATP-dependent serine activating enzyme OS=Klebsiella pneumoniae subsp. pneumoniae (strain ATCC 700721 / MGH 78578) GN=entF PE=4 SV=1	14.3846	10	13	1	1300	141.59	5.4	96.4	90.2	94.7	100.9	128.4	89.4
A0A0C7KL66	galM_2	Aldose 1-epimerase OS=Klebsiella pneumoniae GN=galM_2 PE=3 SV=1	66.2824	15	28	1	347	38.185	5.22	83.9	98.9	91.2	114.2	110.7	101.2
A0A060VJU7	lsrG	(4S)-4-hydroxy-5-phosphonooxypentane-2,3-dione isomerase OS=Klebsiella pneumoniae GN=lsrG PE=3 SV=1	94.898	10	31	2	98	11.51	5.86	113.4	90	77.5	94.7	121.3	103.1
A0A1C3PND4	fabF_1	3-oxoacyl-[acyl-carrier-protein] synthase 2 OS=Klebsiella pneumoniae GN=fabF_1 PE=3 SV=1	34.6698	7	17	7	424	43.751	6.64	88.6	85.2	84	111.1	117.4	113.8
W1G920		L-arabinose-binding periplasmic protein AraF (TC 3.A.1.2.2) OS=Klebsiella pneumoniae ISC21 PE=4 SV=1	44.5333	12	19	12	375	40.723	8.72	102	95.3	95.3	99.7	107.9	99.7
A0A2G4PSK6	CS372_23700	Pyrimidine-specific ribonucleoside hydrolase RihA OS=Klebsiella pneumoniae GN=CS372_23700 PE=4 SV=1	47.5884	6	14	3	311	33.923	4.94	103.9	114.3	113.2	92.5	88.2	87.8
A0A098C7P5	purE	N5-carboxyaminoimidazole ribonucleotide mutase OS=Klebsiella pneumoniae GN=purE PE=3 SV=1	33.7278	4	11	1	169	17.623	6.52	88.7	87.4	88.3	98.5	131.6	105.5
W8UMH4	KPNJ2_03515	Acylphosphatase OS=Klebsiella pneumoniae 30684/NJST258_2 GN=KPNJ2_03515 PE=3 SV=1	39.2523	3	13	1	107	11.797	6.04	109.3	108	109.1	94.2	91.4	88
A6THI4	yjgQ	Putative transmembrane protein, transport OS=Klebsiella pneumoniae subsp. pneumoniae (strain ATCC 700721 / MGH 78578) GN=yjgQ PE=4 SV=1	28.3333	8	16	8	360	39.604	9.48	105.3	102.9	103.9	91.3	98.2	98.5
A6TG68	engB	Probable GTP-binding protein EngB OS=Klebsiella pneumoniae subsp. pneumoniae (strain ATCC 700721 / MGH 78578) GN=engB PE=3 SV=1	58.5714	12	23	12	210	23.517	7.43	96	100.8	100	103.7	98.9	100.5
A0A0S3FHW5	AGG09_24370	Uncharacterized protein OS=Klebsiella pneumoniae GN=AGG09_24370 PE=4 SV=1	38.255	5	15	5	149	16.449	6	38.1	33	34.3	170.8	158.2	165.6
R4Y7E2	folX	FolX protein OS=Klebsiella pneumoniae subsp. rhinoscleromatis SB3432 GN=folX PE=4 SV=1	57.5	6	15	6	120	14.01	7.05	103.8	96.7	96.8	102.7	103.5	96.4
W1HY89	hflD	High frequency lysogenization protein HflD homolog OS=Klebsiella pneumoniae IS39 GN=hflD PE=3 SV=1	34.7418	6	15	6	213	22.921	8.51	97.5	96.2	99.1	100.8	104.3	102.1
W8UMA8	rpmF	50S ribosomal protein L32 OS=Klebsiella pneumoniae 30684/NJST258_2 GN=rpmF PE=3 SV=1	61.4035	4	25	1	57	6.426	11.36	109.1	93.3	88.4	102.8	103.2	103.1
A0A170C445	gsp_2	Bifunctional glutathionylspermidine amidase/synthase OS=Klebsiella pneumoniae GN=gsp_2 PE=4 SV=1	45.5717	19	30	19	621	70.418	6.13	98.4	100.5	99.6	98.5	101.2	101.8
A0A0E1CKD2	KPNJ1_04972	Trehalose-6-phosphate hydrolase OS=Klebsiella pneumoniae 30660/NJST258_1 GN=KPNJ1_04972 PE=4 SV=1	22.9803	9	14	9	557	64.076	5.41	87.7	86.4	88.1	113.8	113.1	110.9
W1AU62		Peptidyl-prolyl cis-trans isomerase PpiB OS=Klebsiella pneumoniae IS22 PE=4 SV=1	42.2414	6	29	1	116	12.468	5.9	94.6	97	94.9	104.7	105.3	103.5
A0A1S0W6C6	murI	Glutamate racemase OS=Klebsiella pneumoniae GN=murI PE=3 SV=1	44.8763	10	16	10	283	31.293	5.54	96.7	93.2	93.2	105.4	111.1	100.5
A0A2G4PSU6	trpB	Tryptophan synthase subunit beta OS=Klebsiella pneumoniae GN=trpB PE=4 SV=1	45.5919	13	25	2	397	42.936	6.54	92.8	94.8	96.3	100	107.8	108.3
A0A0J4XR96	trpB	Tryptophan synthase beta chain OS=Klebsiella pneumoniae GN=trpB PE=3 SV=1	45.5919	13	25	2	397	42.922	6.54	90.4	97.2	101	104.2	99.7	107.5
[truncated: 2,434 more rows]

## Sheet: S2 file
Supplementary file 2_peptides
Sequence	Modifications	Qvality PEP	Qvality q-value	# PSMs	Master Protein Accessions	# Missed Cleavages	Theo. MH+ [Da]	Abundances A1	Abundances A2	Abundances A3	Abundances B1	Abundances B2	Abundances B3	Ions Score Mascot	Charge Mascot	DeltaM [ppm] Mascot	RT [min] Mascot
VAELATQAGIPDGVFNVVTGSGAGCGAALTAHPQVAK	2xiTRAQ8plex [N-Term; K37]; 1xCarbamidomethyl [C25]	4.26053e-11	0	1	A0A060VQG2	0	4143.21	88.4	72	83.6	122.8	125.6	107.7	46.07	5	3.93716	49.3243
AIAALQVLPDTPWR	1xiTRAQ8plex [N-Term]	1.10883e-07	0	1	A0A2D2PT56	0	1855.07	68.8	61.5	66	140.1	143	120.6	59.17	2	5.51016	47.8287
FMQEAVPEGTGAMSAIIGLDDAAIAK	2xiTRAQ8plex [N-Term; K26]; 1xOxidation [M2]	5.28169e-08	0	1	A0A0C7KGN8; W9B788	0	3230.69	97.1	107.9	114.5	94	84.8	101.8	59.38	4	-4.86412	49.7431
FMQEAVPEGTGAMSAIIGLDDAAIAK	2xiTRAQ8plex [N-Term; K26]; 1xDeamidated [Q3]	4.83738e-05	0	1	A0A0C7KGN8; W9B788	0	3215.68	96.6	103.5	101.2	101.3	104.5	92.9	35.49	4	6.39839	51.1624
FMQEAVPEGTGAMSAIIGLDDAAIAK	2xiTRAQ8plex [N-Term; K26]	2.09738e-08	0	5	A0A0C7KGN8; W9B788	0	3214.69	104.7	106.8	100.3	99.5	93.8	94.8	72.47	3	-4.09265	51.1144
ISQILDFPLR	1xiTRAQ8plex [N-Term]	0.000201649	0	2	A0A2D2GR64	0	1505.9	95.2	91	101.5	115.2	100.8	96.2	43.81	3	-2.57288	47.7684
ELEPYRPLFIEEPVLAEQAEYYPR	1xiTRAQ8plex [N-Term]; 1xDeamidated [Q18]	0.000267829	0	1	A0A263K7T9	0	3256.67	93.4	101.9	100.8	111.9	102.5	89.5	11.35	3	6.68547	47.8087
ELGAVFLIGIGGK	2xiTRAQ8plex [N-Term; K13]	0.00015276	0	1	A0A0E1CLT8	0	1882.16	72	85	91.2	111.6	126.9	113.4	25.39	3	-0.694654	47.7689
VIVLDPVDSSAAAALVENAQAQGVK	2xiTRAQ8plex [N-Term; K25]	1.03814e-13	0	2	A0A0C7KFT1	0	3073.74	44.2	46.1	47.2	167.2	136.7	158.7	100.11	3	3.61769	50.0067
GLPVTEVSDYTGFPEMMDGR	1xiTRAQ8plex [N-Term]	6.55069e-06	0	2	A0A0E1CQK9; W1AVK1; W9BD71; A0A2G3RXF5	0	2505.19	107.2	98.1	100	107.6	103.5	83.8	48.88	3	-1.84449	47.6751
EAVGIDNFYLFGAVAEEIEESRR	1xiTRAQ8plex [N-Term]; 1xDeamidated [N7]	5.20036e-06	0	1	A0A0C7KAB4	1	2919.47	116	108.2	112.2	90.9	98.2	74.5	23.81	4	9.00573	51.6848
GIAAASLAAILEAR	1xiTRAQ8plex [N-Term]	1.05728e-09	0	6	W1AS69; C8T296	0	1630.98	99.4	99	99.9	99.2	98	104.4	93.03	3	-3.58783	47.6419
ELALVDGMALDGGSTLTQDGK	2xiTRAQ8plex [N-Term; K21]; 1xOxidation [M8]	0.000112483	0	1	B5XRE7	0	2715.43	98.4	102.8	99.5	96.2	103.9	99.3	37.5	3	9.89673	47.6251
LEEIQECHLVSGDFDYLLK	2xiTRAQ8plex [N-Term; K19]; 1xCarbamidomethyl [C7]	1.43744e-08	0	6	A0A060VMY1	0	2916.53	101.8	108.7	110.4	93	94.3	91.8	47.09	3	-1.87589	48.1713
IDAVAFVESIPFSETR	1xiTRAQ8plex [N-Term]	2.02665e-09	0	2	A0A060VDP3	0	2085.12	96.5	99.6	97.6	101.6	105	99.7	72.67	3	-2.00704	51.1307
DSEIYNVTASLDIYPVER	1xiTRAQ8plex [N-Term]	5.00924e-05	0	2	W9BI06; A6TB72	0	2388.22	83.1	95.7	98.9	106.9	120.8	94.5	43.26	2	0.237831	48.0449
QFPVGEIFALAR	1xiTRAQ8plex [N-Term]	4.75219e-07	0	3	A0A0J5A323; A0A164GXP1	0	1651.95	93.9	99.5	95.6	110.1	103.1	97.9	66.76	3	-0.337008	47.9883
NLNLDLQTLTEEAVR	1xiTRAQ8plex [N-Term]; 1xDeamidated [N3]	1.48862e-08	0	3	W1BGB6	0	2034.1							59.37	3	-0.572911	47.4717
NLNLDLQTLTEEAVR	1xiTRAQ8plex [N-Term]	7.37786e-06	0	1	W1BGB6	0	2033.12	97.3	69.8	72.9	111.3	131.7	117.1	35.37	3	-1.01995	46.112
NLDLDLQTLTEEAVR	1xiTRAQ8plex [N-Term]	1.48862e-08	0	3	A0A1W1JCS3	0	2034.1	85.4	83.6	82.9	116.4	117.2	114.6	59.37	3	-0.5727	47.4717
LTPLGIGITDYYIR	1xiTRAQ8plex [N-Term]	0.000352916	0	2	A0A0J4XUT3	0	1899.09	93.2	94.1	98.7	110.1	102.5	101.5	35.98	3	1.18269	47.432
TQSSYNADAIEVLTGLEPVR	1xiTRAQ8plex [N-Term]	1.23321e-09	0	4	A0A2D3D0T7	0	2467.3	99.5	87.1	93.5	100.4	118.8	100.8	74.97	3	2.98	47.4374
TQSSYNADAIEVLTGLEPVR	1xAcetyl [N-Term]	3.93105e-06	0	1	A0A2D3D0T7	0	2205.1							70.65	2	2.41377	52.3156
GIMEGEYDHLPEQAFYMVGSIEEAVEK	2xiTRAQ8plex [N-Term; K27]; 1xDeamidated [Q13]	0.000119755	0	1	W1AQY2	0	3680.8	85.1	99.6	113.5	89.2	96.5	116	21.84	4	1.73553	47.4017
VTDVIDVTIAEVR	1xiTRAQ8plex [N-Term]	3.01776e-08	0	2	W1H0W7; W1B3C1; A0A0C7KGV1	0	1734	94.2	102.7	102.4	100.5	99.3	101	74.19	3	2.20843	47.3791
TQDGVMLDFYQVG	1xiTRAQ8plex [N-Term]	0.000402151	0	1	A0A0J4XA13	0	1776.88	105.6	82.7	86.4	91.8	127.5	106.1	58.51	2	-3.63497	47.349
STIFVQSHVPEHAQLGWALNCYTYFGELSR	1xiTRAQ8plex [N-Term]; 2xDeamidated [Q6; Q14]; 1xCarbamidomethyl [C21]	1.1475e-06	0	1	A0A169IE48	0	3816.86	94.4	78.9	85.5	106.2	135.5	99.6	41.33	4	9.2364	47.3318
VLALDMGALVAGAK	2xiTRAQ8plex [N-Term; K14]	9.70122e-07	0	4	A0A2D3CDL8; W8UGL7	0	1937.17	101.6	101.5	111.1	96.5	104.4	84.9	53.42	2	0.41971	47.3265
HLGMMCLSYLVTPVEAG	1xiTRAQ8plex [N-Term]; 1xCarbamidomethyl [C6]	1.3653e-05	0	1	A0A1B3A7R1	0	2182.1	112.7	103.4	108.2	87	94.5	94.2	20.93	3	2.84661	47.3252
EMLIADGIDPNELLNSMAAVK	2xiTRAQ8plex [N-Term; K21]; 2xDeamidated [N11; N15]	0.000138593	0	1	A0A2G3RRA4	0	2854.5	93.7	86.2	73.3	99	136	111.8	42.21	3	14.5737	48.6202
SVEELNPPQEINVTHSVPDVDTLVDIYR	1xiTRAQ8plex [N-Term]; 1xDeamidated [Q/N]	0.000331709	0	3	A0A024HW38	0	3483.78	100.8	110.2	108.2	96.1	107.5	77.2	25.66	3	6.62179	47.8644
LTGALEEAANEFR	1xiTRAQ8plex [N-Term]	6.83147e-06	0	3	A0A0H3H2B7	0	1724.91	103.5	94.9	98.7	97.3	99.2	106.3	59.52	3	-1.46369	47.3079
QLINTVHVDMLIVPLRDEEDE	1xiTRAQ8plex [N-Term]	1.3678e-07	0	17	W8UN60	1	2782.46	94.9	96.2	97.2	103.1	104.9	103.8	58.73	2	-0.284944	47.0565
QLINTVHVDMLIVPLRDEEDE	1xiTRAQ8plex [N-Term]; 1xOxidation [M10]	4.2068e-05	0	7	W8UN60	1	2798.45	83.3	81.3	85.2	116	117	117.2	40.58	3	1.74706	43.0305
SFFVGNNHMVEDVENFIK	2xiTRAQ8plex [N-Term; K18]	2.26194e-06	0	6	A0A2G8ABH6	0	2734.41	108.4	111	110.2	94.3	87.9	88.2	47.42	2	-4.53819	46.7972
ADLLNFYQQWQPSR	1xiTRAQ8plex [N-Term]	8.81445e-05	0	2	A0A097J9H8	0	2070.07	68.3	58.5	67.5	129.2	136.5	140	36.01	3	0.360635	48.0108
FLNLIAGEPDIAR	1xiTRAQ8plex [N-Term]	3.01338e-06	0	3	A0A060VKZ3	0	1732.99	105.2	106.4	109.3	88.1	93.3	97.7	49.15	3	-1.44278	47.9492
IVDYPGLLVWR	1xiTRAQ8plex [N-Term]	0.000345703	0	2	A0A2G4YG91	0	1634.96	133.3	147.7	136.3	56.1	59.6	67.1	37.44	3	2.00539	48.0873
AIDDVTPGEFDALLLPGGYSPDQLRGDER	1xiTRAQ8plex [N-Term]; 1xDeamidated [Q23]	8.8761e-05	0	2	R4YI37	1	3421.71	53.9	58.1	46.1	147.4	148.1	146.4	38.41	4	6.34081	47.9622
AIDDVTPGEFDALLLPGGYSPDQLRGDER	1xiTRAQ8plex [N-Term]	4.53127e-09	0	6	R4YI37	1	3420.72	100.3	114	114.1	93.9	90.6	87	47.63	2	-0.427651	49.7888
NALDKIPLDTDLRDAIELAQR	2xiTRAQ8plex [N-Term; K5]	3.15904e-05	0	2	A0A0J4TV63; A0A181QJR8	2	2988.69	92.9	101.6	104.2	101.4	101.8	98.1	23.25	5	-1.87514	45.4676
FYAGQPVSLPDGTVAGTLCLIHTVPR	1xiTRAQ8plex [N-Term]; 1xDeamidated [Q5]; 1xCarbamidomethyl [C19]	4.95593e-07	0	1	A0A169HRU6	0	3074.63	98.7	113.9	101.9	79.1	128.9	77.5	61.65	3	8.10355	47.9595
FYAGQPVSLPDGTVAGTLCLIHTVPR	1xiTRAQ8plex [N-Term]; 1xCarbamidomethyl [C19]	8.4996e-08	0	1	A0A169HRU6	0	3073.64	108.8	108.7	107	75.5	105.8	94.3	32.67	4	5.18505	48.0081
LVTYPGNYDQYLLDKEEALRVEELQNAEFDR	2xiTRAQ8plex [N-Term; K15]	0.000421938	0	1	A0A0C7KG71	2	4339.23	86.5	102.6	105.4	103.3	99.9	102.3	3.87	5	-2.13101	47.9555
IPHENDSEEEQLLSSDVGPFEILQAR	1xiTRAQ8plex [N-Term]; 1xDeamidated [Q/N]	0.000244804	0	2	A0A170G731	0	3257.61	107.8	99.2	103.7	89.4	109.2	90.7	9.19	4	10.1053	47.9383
KTAEDYLGEPVTEAVITVPAYFNDAQR	2xiTRAQ8plex [N-Term; K1]; 1xDeamidated [N/Q]	4.41222e-11	0	5	A6T4F4	1	3606.88	97	105	103.9	101.2	97.1	95.8	50.38	5	-1.76331	48.0264
KTAEDYLGEPVTEAVITVPAYFNDAQR	2xiTRAQ8plex [N-Term; K1]	6.09987e-14	0	6	A6T4F4	1	3605.89	105.6	98.7	103.8	95.5	98.1	98.3	68.99	3	-0.467919	48.0195
DGLPAADFSVFYHLISIDR	1xiTRAQ8plex [N-Term]	2.05801e-11	0	4	A0A2G8AL55; W1E7P4	0	2440.28	92.6	88.3	88.1	108.4	115.9	106.9	77.83	2	-0.338175	51.3362
EPWLSDIEQGVQLAR	1xiTRAQ8plex [N-Term]	7.18575e-08	0	2	A0A1W1JCX3; A0A1C3PRL7; A0A170A3D2	0	2045.1	89.2	87.1	86.4	108.2	115.6	113.5	72.6	2	-0.19614	47.9542
FMQEAVPEGTGGMSAIIGLDDASIAK	2xiTRAQ8plex [N-Term; K26]; 1xOxidation [M]	0.000365267	0	3	A0A2G3S1G5	0	3232.67	100.2	104.3	101.9	97.5	107	89.1	20.84	4	8.42579	47.8961
EIPSDIVYQDELVTAFR	1xiTRAQ8plex [N-Term]; 1xDeamidated [Q9]	0.000138593	0	1	W1HRI2	0	2300.2	87.4	85.8	85.4	97.7	144.7	99	35.34	3	-4.21929	48.9594
EIPSDIVYQDELVTAFR	1xiTRAQ8plex [N-Term]	8.81422e-10	0	6	W1HRI2	0	2299.21	90.6	98.9	97.5	105.9	110.9	96.1	75.29	2	0.380371	48.1913
QVMAMGCWSEQELVGEQGHWQAK	2xiTRAQ8plex [N-Term; K23]; 2xDeamidated [Q11; Q17]; 1xCarbamidomethyl [C7]	1.62808e-06	0	1	A0A0J4Y424	0	3299.57	102.6	108.8	98.4	86.8	101.5	101.9	46.35	3	6.79968	40.5728
QVMAMGCWSEQELVGEQGHWQAK	2xiTRAQ8plex [N-Term; K23]; 1xCarbamidomethyl [C7]	1.87525e-08	0	1	A0A0J4Y424	0	3297.61	94.2	103.3	97.3	106.9	95.1	103.2	51.34	4	0.899682	40.7751
AMAEALGWHLLDSGAIYR	1xiTRAQ8plex [N-Term]	1.66722e-10	0	5	A6T702; A0A246QYW1	0	2278.2	83.1	90.3	86.7	116.8	112.6	110.5	84.78	2	-0.0844182	47.9001
EFLENYLMTDQGLESVNNDKPLGAVALK	3xiTRAQ8plex [N-Term; K20; K28]; 2xDeamidated [Q/N]	0.000305373	0	3		0	4023.14							21.7	6	8.58255	47.4246
EFLENYLMTDQGLEAVNNDKPLGAVALK	3xiTRAQ8plex [N-Term; K20; K28]; 1xOxidation [M8]; 3xDeamidated [Q11; N17; N18]	2.47731e-06	0	1	A0A210UVI8; A0A0J5B340	0	4024.12	66	83.9	78.4	143.1	103.4	125.2	48.87	3	6.72301	47.5025
EFLENYLMTDQGLEAVNNDKPLGAVALK	3xiTRAQ8plex [N-Term; K20; K28]; 1xOxidation [M8]; 2xDeamidated [Q/N]	2.8847e-05	0	7	A0A210UVI8; A0A0J5B340	0	4023.14	82.5	87.4	94.8	112.6	113.4	109.4	25.55	4	10.7131	47.3889
EFLENYLMTDQGLEAVNNDKPLGAVALK	3xiTRAQ8plex [N-Term; K20; K28]; 1xOxidation [M8]; 1xDeamidated [Q11]	3.18684e-06	0	2	A0A210UVI8; A0A0J5B340	0	4022.16	74.8	89.1	89.9	120.4	107.7	118.1	32.97	4	3.03908	47.6383
EFLENYLMTDQGLEAVNNDKPLGAVALK	3xiTRAQ8plex [N-Term; K20; K28]; 3xDeamidated [N/Q]	1.90037e-07	0	4	A0A210UVI8; A0A0J5B340	0	4008.13	84.5	93.1	97	113.9	98.4	113.1	35.02	3	2.80106	49.3674
EFLENYLMTDQGLEAVNNDKPLGAVALK	3xiTRAQ8plex [N-Term; K20; K28]; 2xDeamidated [N/Q]	9.70806e-08	0	3	A0A210UVI8; A0A0J5B340	0	4007.14	94.2	85.7	90.9	120	103.6	105.6	34.05	5	2.72068	49.3187
EFLENYLMTDQGLEAVNNDKPLGAVALK	3xiTRAQ8plex [N-Term; K20; K28]; 1xDeamidated [N/Q]	6.94818e-10	0	8	A0A210UVI8; A0A0J5B340	0	4006.16	70.5	76.7	80.6	133.4	102.2	136.7	77.82	3	1.89192	49.2494
EFLENYLMTDQGLEAVNNDKPLGAVALK	3xiTRAQ8plex [N-Term; K20; K28]	1.18251e-09	0	3	A0A210UVI8; A0A0J5B340	0	4005.18	77.6	85.6	84.4	123.2	110.7	118.5	50.26	6	-3.4648	49.2308
QLINTVHVDMLIVPLRDEEDE	1xiTRAQ8plex [N-Term]; 1xDeamidated [N4]	2.69815e-08	0	6	W8UN60	1	2783.44	89	92.6	92.6	107.3	112.1	106.4	61.67	2	0.19498	50.2059
GFSGEDATPALEGADVVLISAGVAR	1xiTRAQ8plex [N-Term]	2.29354e-16	0	19	Q2YI00; A0A0E1C8C6; Q2YHZ7	0	2706.43	91.9	95.5	94.5	108.6	107.9	101.6	109.41	2	-0.111436	50.4009
HLGFPALAVSLNGYQHYDTAAAVTCTILR	1xiTRAQ8plex [N-Term]; 2xDeamidated [N12; Q15]; 1xCarbamidomethyl [C25]	4.86297e-10	0	2	A0A060VJI9	0	3465.78	89.5	89.8	109.2	106	120	85.6	68.72	4	7.79752	47.2538
VEILPMMYLALSYDHR	1xiTRAQ8plex [N-Term]; 1xOxidation [M7]	9.1643e-06	0	1	W1GPB1; A0A2G8ATV0; A0A2G3S0C1; A0A236RDP7	0	2271.18	92.3	101.2	93.6	109.7	99.2	104	44.3	3	1.1742	47.2499
YVPPGDIADVVQESFVK	2xiTRAQ8plex [N-Term; K17]	8.51253e-05	0	3	W1B353	0	2471.36	105.1	104.3	102.2	97.7	94.5	96.1	30.81	3	-3.01541	46.8224
VLGCYPSENVVPVDPV	1xiTRAQ8plex [N-Term]; 1xCarbamidomethyl [C4]	0.00011728	0	1	A0A170SFY4; A0A0E1CAA4	0	2048.07	101.3	94.2	89.3	90.9	120.9	103.4	47.63	2	0.175962	46.7878
LSITAYWSPMYFKPGDSDSEQMR	2xiTRAQ8plex [N-Term; K13]; 1xDeamidated [Q21]	6.17614e-05	0	2	A0A0E1CFS1	0	3318.63	63.7	58.8	66.7	136.9	137.3	136.6	23.31	4	2.57808	46.7733
TLDDVIDGADIFLGCSGPK	2xiTRAQ8plex [N-Term; K19]; 1xCarbamidomethyl [C15]	7.45173e-10	0	5	A0A2G3RZG7; R4Y777	0	2601.37	103.7	108.9	106	99.3	93.5	88.4	78.91	2	-5.74769	50.9622
ADPLEQGAGDQGLMFGYATNETDVLMPAPVTYAHR	1xiTRAQ8plex [N-Term]; 1xOxidation [M14]; 2xDeamidated [Q11; N20]	0.000189447	0	2	A0A060VEL3	0	4057.91	81.4	98	93	95.4	133.8	98.4	25.92	4	13.7719	46.6116
ADPLEQGAGDQGLMFGYATNETDVLMPAPVTYAHR	1xiTRAQ8plex [N-Term]; 1xOxidation [M]	9.58622e-10	0	2	A0A060VEL3	0	4055.94	69.5	83.4	79.7	95.4	143.8	128.2	56.42	4	0.900794	46.7391
ADPLEQGAGDQGLMFGYATNETDVLMPAPVTYAHR	1xiTRAQ8plex [N-Term]; 3xDeamidated [Q6; Q11; N20]	4.68615e-07	0	1	A0A060VEL3	0	4042.9	100.7	81.4	87	106.4	119.6	104.9	38.3	5	14.0699	49.563
ADPLEQGAGDQGLMFGYATNETDVLMPAPVTYAHR	1xiTRAQ8plex [N-Term]; 2xDeamidated [N20; Q]	3.62971e-12	0	2	A0A060VEL3	0	4041.92	85.4	80.4	73	125.2	127.5	108.6	99.32	3	9.23446	49.5486
ADPLEQGAGDQGLMFGYATNETDVLMPAPVTYAHR	1xiTRAQ8plex [N-Term]	5.601e-12	0	2	A0A060VEL3	0	4039.95	70.7	79.1	80.7	119.1	125.4	125	91.94	3	-3.90135	49.5234
IDMASPFIVMRDPVLYR	1xiTRAQ8plex [N-Term]	0.000181723	0	1	A0A237QZT7; V0APM5; A0A2G3S0G5	1	2327.26	107.6	109.3	105.3	85.1	96.5	96.3	20.01	3	0.367413	46.7364
AVTLLADDKLDDLLDK	3xiTRAQ8plex [N-Term; K9; K16]	9.97655e-07	0	1	A0A0C7KJF2	1	2670.57	102.4	111.4	102.6	102.6	92.5	88.5	23.09	4	-2.54731	46.7207
QFGATDCINPNDYDKPVQQVLVEMTK	3xiTRAQ8plex [N-Term; K15; K26]; 3xDeamidated [N/Q]; 1xCarbamidomethyl [C7]	1.47447e-05	0	4	Q0QCD7	0	3926							42.01	4	8.73501	46.7128
QFGATDCINPNDYDKPVQQVLVEMTK	3xiTRAQ8plex [N-Term; K15; K26]; 1xCarbamidomethyl [C7]	1.45399e-05	0	1	Q0QCD7	0	3923.04	48.7	37.6	39.1	163.8	158.8	152	31.07	6	-5.38652	46.8036
FWLQQNVSLGDFAQR	1xiTRAQ8plex [N-Term]	0.000318273	0	1	A0A1B2ZRM1; J2X3U4	0	2113.11	93.9	87.8	91.2	123	107.9	96.1	23.54	3	1.15075	46.7023
LQQQQAIDDGQLPDFISETASIR	1xiTRAQ8plex [N-Term]; 2xDeamidated [Q5; Q11]	1.9367e-05	0	1	A0A0C7KLE9	0	2879.46	99.2	115.2	109.8	74.3	106.8	94.6	35.07	3	11.8409	46.6668
LQQQQAIDDGQLPDFISETASIR	1xiTRAQ8plex [N-Term]	3.80931e-11	0	3	A0A0C7KLE9	0	2877.49	113.8	120.5	123	84.1	87.7	71	75.73	4	1.90127	47.2656
ALNTLEMMADMAESDDSGKR	2xiTRAQ8plex [N-Term; K19]; 1xDeamidated [N3]	4.43106e-07	0	2	V0B1J2	1	2794.35	92.8	97.5	98	104.8	111	96	21.05	3	3.64897	46.6455
ALNTLEMMADMAESDDSGKR	2xiTRAQ8plex [N-Term; K19]	1.04847e-07	0	1	V0B1J2	1	2793.37	95.5	93.5	92.2	105	110.1	103.7	47.17	3	-7.94953	46.6682
EARPDIQISSDFIVGFPGETTEDFEK	2xiTRAQ8plex [N-Term; K26]; 1xDeamidated [Q7]	2.5795e-05	0	1	R4YI77	0	3536.79	89	83.7	81.7	112.2	115.2	118.3	20.01	5	1.67219	46.6389
AFVPEEYWEVDASTTTPGGDALPLQVTHK	2xiTRAQ8plex [N-Term; K29]; 1xDeamidated [Q25]	1.36683e-06	0	3	W8UWG7	0	3767.93	89.3	91.5	94	110.7	107	107.5	26.26	3	6.49685	46.5438
AFVPEEYWEVDASTTTPGGDALPLQVTHK	2xiTRAQ8plex [N-Term; K29]	4.30877e-07	0	1	W8UWG7	0	3766.94	89.8	99.6	117.5	96.5	95.3	101.4	39.14	4	6.44828	46.5371
VTDVSCTVSVNGQGSDANVYLSPVTLTEVK	2xiTRAQ8plex [N-Term; K30]; 3xDeamidated [N11; Q13; N18]; 1xCarbamidomethyl [C6]	1.46794e-08	0	5	V0B805	0	3750.91	85.3	89.5	89.3	110.1	119.5	106.4	74.19	4	9.88306	46.6205
VTDVSCTVSVNGQGSDANVYLSPVTLTEVK	2xiTRAQ8plex [N-Term; K30]; 2xDeamidated [N11; Q/N]; 1xCarbamidomethyl [C6]	1.09566e-10	0	3	V0B805	0	3749.93	74.1	87.7	79.9	131.8	108.7	117.8	87.65	3	5.70814	47.1804
VTDVSCTVSVNGQGSDANVYLSPVTLTEVK	2xiTRAQ8plex [N-Term; K30]; 1xDeamidated [N11]; 1xCarbamidomethyl [C6]	1.87653e-09	0	1	V0B805	0	3748.94	83.8	77	80.5	132.2	109.6	117	77.63	4	0.188839	47.1368
LGYQLMEQALASCQQHWPQK	2xiTRAQ8plex [N-Term; K20]; 2xDeamidated [Q14; Q15]; 1xCarbamidomethyl [C13]	1.16245e-05	0	1	A0A0E1CB60	0	3026.53	91.9	98.2	103.4	99.9	105.8	100.7	35.51	3	12.6194	46.5876
QILDDELEHLGISLK	2xiTRAQ8plex [N-Term; K15]	1.33005e-07	0	3	A0A060VEB3	0	2331.34	105.1	108.7	112.8	95.4	89.8	88.1	66.14	2	-1.16172	46.6298
AEQDALLLEVWQACNK	2xiTRAQ8plex [N-Term; K16]; 1xCarbamidomethyl [C14]	1.47447e-05	0	1	A0A0H3GQX6	0	2496.34	89.2	77.1	87	99.5	138.1	109	31.29	3	-1.91676	46.585
ACAEAGVFLISPFVGR	1xiTRAQ8plex [N-Term]; 1xCarbamidomethyl [C2]	2.08417e-09	0	8	W1AR82; A0A2A2SYM1; W1AVU2; A0A2G3RZA0; A0A060VNS6	0	1998.08	101.3	97.1	98.6	96	105	102.1	68.54	4	2.31756	47.9437
LAEGEKIPTEIELSELYNISR	2xiTRAQ8plex [N-Term; K6]; 1xDeamidated [N18]	5.12811e-06	0	2	W1I1K9	1	3013.66	91.9	97.4	95.9	99.3	110.2	105.3	35.51	4	5.21266	46.5692
FLDNQYLEVDGVELK	2xiTRAQ8plex [N-Term; K15]	9.62415e-06	0	1	W8V177	0	2390.31	104.2	113.3	112.7	98.8	90.5	80.6	45.37	3	-7.33591	46.8272
AFQLEVEELDAQAVMQR	1xiTRAQ8plex [N-Term]	1.52123e-09	0	3	A0A060VGF7	0	2281.18	96.1	92.3	102.2	99.2	111.7	98.6	81.72	3	2.86462	46.8445
AFQLEVEELDAQAVMQR	1xiTRAQ8plex [N-Term]; 1xDeamidated [Q3]	1.93926e-06	0	1	A0A060VGF7	0	2282.16	86.4	109.9	103.8	102.2	96.6	101.2	44.12	2	3.80217	46.9043
SYDPDSSWNPYLELSANYR	1xiTRAQ8plex [N-Term]	4.07422e-07	0	6	A0A0E1CFS1	0	2581.21	89	88.2	88.8	113.5	115.4	105.2	53.26	3	1.43852	45.983
VEILPMMYLALSYDHR	1xiTRAQ8plex [N-Term]	1.07071e-07	0	4	W1GPB1; A0A2G8ATV0; A0A2G3S0C1; A0A236RDP7	0	2255.19	90.6	89.7	93	101.3	119.4	106.1	56.17	3	-0.0708941	51.4844
LWMGLEALGQK	2xiTRAQ8plex [N-Term; K11]	0.000193431	0	2	W8UK19	0	1854.08	88.7	88.9	80.4	118.2	109.6	114.2	27.79	2	-2.24788	47.2723
TILVADEGSYVSYIEGCSAPVR	1xiTRAQ8plex [N-Term]; 1xCarbamidomethyl [C17]	1.6121e-12	0	4	A0A0E1CDJ6	0	2690.36	87.4	90.5	95.5	110.4	113.2	102.9	95.53	3	0.241788	47.2381
RVFNELIGDDEAQSPDEQLAEYWR	1xiTRAQ8plex [N-Term]; 1xDeamidated [Q13]	5.13237e-07	0	1	A0A060VJN5	1	3185.53	55.1	65	57.6	146.3	127.6	148.4	58.6	3	9.71557	47.1106
REEAAALGVPPDLIEDVLR	1xiTRAQ8plex [N-Term]	2.03809e-07	0	1	A0A0J4N477	1	2367.32	89	90.6	97.6	104.8	119	99.1	50.02	3	-2.36715	47.1039
RAEAEALGVPPDLIEDVLR	1xiTRAQ8plex [N-Term]	2.52985e-06	0	1	A0A2G3S005	1	2367.32							50.02	3	-2.36715	47.1039
SVIQALGNAFGNYHSEPYVQLQGDDR	1xiTRAQ8plex [N-Term]	5.20036e-06	0	1	A0A2D2G1B9	0	3182.58	91.4	91.3	97.5	108.4	101.6	109.9	27.05	4	-2.64285	47.1606
CLMFFTPGVPSEFK	2xiTRAQ8plex [N-Term; K14]; 1xCarbamidomethyl [C1]	5.1872e-05	0	2	A0A2A2SP97; A0A2D3CP65	0	2268.2	102.2	102.5	100.7	103.6	92.9	98.1	32.1	3	2.13752	47.0735
FPMTAPWQQVLSER	1xiTRAQ8plex [N-Term]	1.7831e-06	0	1	A0A1B2ZNL6; W8UH67	0	1994.05	77.8	82.7	84.3	115.9	120.3	118.9	53.92	3	-1.56363	47.0655
LLDAVPLSSLTGVGAAQSSK	2xiTRAQ8plex [N-Term; K20]	1.58126e-05	0	1	J2LPF3	0	2522.46	78.8	81.4	83.6	115.1	114.5	126.6	26.97	3	-1.82007	47.0512
WLPPFAMHCTFICDDETLQAQAR	1xiTRAQ8plex [N-Term]; 2xCarbamidomethyl [C9; C13]	1.33005e-07	0	1	W8VI31	0	3111.48	105.4	95.9	87.7	96.7	117.2	97.1	50.6	3	-0.659327	47.0445
ATIDAHIPPQSLEEMWDIEGLQER	1xiTRAQ8plex [N-Term]; 1xDeamidated [Q]	5.42783e-07	0	5	B5Y1T9; W8VI18	0	3083.53	112.7	96.5	101	86.8	119	84	36.98	3	8.69007	48.1821
ATIDAHIPPQSLEEMWDIEGLQER	1xiTRAQ8plex [N-Term]	8.26503e-08	0	3	B5Y1T9; W8VI18	0	3082.55	94.9	104.7	106.6	93	110.5	90.4	42.66	4	1.85974	47.1975
AAAIPQALLAAQPGAVNVASLGK	2xiTRAQ8plex [N-Term; K23]; 1xDeamidated [N/Q]	1.15555e-06	0	2	A0A168Y3C6	0	2740.62	115.4	86.4	95.9	91.2	113.3	97.8	35.81	3	4.20068	47.0116
SFFVGNNHMVEDVENFIK	2xiTRAQ8plex [N-Term; K18]; 1xDeamidated [N]	6.12182e-09	0	9	A0A2G8ABH6	0	2735.4	107.3	113.1	112.9	92.7	87.8	86.3	49.09	3	-2.53593	50.0601
AAAIPQALLAAQPGAVNVASLGK	2xiTRAQ8plex [N-Term; K23]	2.77662e-09	0	2	A0A168Y3C6	0	2739.63	127.5	98.8	92.1	98.2	94.2	89.2	68.05	3	-1.27571	47.0313
QPGDEPVFTSTLALDMSSVEASLAGPK	2xiTRAQ8plex [N-Term; K27]; 1xOxidation [M16]	6.51072e-07	0	4	A0A0H3GRP5; A0A060VLI1; A0A181RH77; A0A1Y0PZ95	0	3371.75	94.7	91.7	93.3	105	117.1	98.2	62.31	3	0.705169	47.0196
QPGDEPVFTSTLALDMSSVEASLAGPK	2xiTRAQ8plex [N-Term; K27]; 1xDeamidated [Q1]	3.05057e-05	0	3	A0A0H3GRP5; A0A060VLI1; A0A181RH77; A0A1Y0PZ95	0	3356.74	115.6	97.9	93.6	93.8	97.5	101.5	27.65	4	1.5329	51.6042
QPGDEPVFTSTLALDMSSVEASLAGPK	2xiTRAQ8plex [N-Term; K27]	2.40211e-12	0	5	A0A0H3GRP5; A0A060VLI1; A0A181RH77; A0A1Y0PZ95	0	3355.76	101.8	101	104.6	102.1	98.3	92.1	98.98	3	1.88508	51.6106
EGLNVLQYFISTHGAR	2xiTRAQ8plex [N-Term; Y8]	6.26294e-05	0	1	A0A1Y0Q5T0; B5XYF4; W1AVH9	0	2413.34	148.3	106.3	111.4	83.7	82.2	68.1	16.59	5	-4.51996	38.9641
EGLNVLQYFISTHGAR	1xiTRAQ8plex [N-Term]; 1xDeamidated [N4]	2.35891e-06	0	1	A0A1Y0Q5T0; B5XYF4; W1AVH9	0	2110.12	93.6	88.2	106.9	100.2	117.4	93.8	46.14	3	-2.30762	46.9957
EGLNVLQYFISTHGAR	1xiTRAQ8plex [N-Term]	2.97785e-09	0	3	A0A1Y0Q5T0; B5XYF4; W1AVH9	0	2109.14	82	87.3	91.5	112.7	107.7	118.9	57.28	2	0.9422	45.0819
DFGPDWLDGWCETK	2xiTRAQ8plex [N-Term; K14]; 1xCarbamidomethyl [C11]	5.93958e-06	0	3	A0A231WLY0; A0A060VQG2	0	2334.13	86.6	86.9	87	118.5	109.4	111.5	36.64	4	-0.665729	47.1962
VWTGGGDEAALAQGVYNTYIQDNLR	1xiTRAQ8plex [N-Term]; 2xDeamidated [Q13; N17]	4.06242e-05	0	1	C8T5X6; A0A2D1HL99	0	3017.48	85.6	86.6	88.8	108.7	126.9	103.4	28.69	4	3.24159	46.9626
VWTGGGDEAALAQGVYNTYIQDNLR	1xiTRAQ8plex [N-Term]; 1xDeamidated [N/Q]	3.22706e-14	0	5	C8T5X6; A0A2D1HL99	0	3016.5	97.5	89.9	91.4	103.8	112.7	104.7	107.33	4	5.14702	50.8515
VWTGGGDEAALAQGVYNTYIQDNLR	1xiTRAQ8plex [N-Term]	4.80521e-13	0	1	C8T5X6; A0A2D1HL99	0	3015.51	87.9	96.8	85.3	109.1	106.2	114.7	95.31	3	-1.68571	50.837
EGFEVTYLAPQSNGIIDLK	2xiTRAQ8plex [N-Term; K19]; 2xDeamidated [Q11; N13]	1.29243e-06	0	1	R4Y6M1	0	2704.45	90.2	89.1	111.8	111.7	101.9	95.3	47.52	2	4.34625	47.6646
EGFEVTYLAPQSNGIIDLK	2xiTRAQ8plex [N-Term; K19]; 1xDeamidated [N/Q]	1.46693e-07	0	7	R4Y6M1	0	2703.47	101.5	98.1	104.7	96.8	100.6	98.2	54.59	3	-1.52439	47.6237
ASHGALCGSLLPFGLALNESQINDPGLR	1xiTRAQ8plex [N-Term]; 2xDeamidated [N18; Q21]; 1xCarbamidomethyl [C7]	2.65683e-06	0	1	A0A1W1JCX3; A0A170A3D2	0	3213.65	100.3	87.4	81.7	118.3	112.8	99.4	31.5	3	8.86347	46.859
ASHGALCGSLLPFGLALNESQINDPGLR	1xiTRAQ8plex [N-Term]; 1xCarbamidomethyl [C7]	2.02527e-08	0	1	A0A1W1JCX3; A0A170A3D2	0	3211.68	97.4	79.1	85.1	106.2	117.6	114.6	53.74	4	2.19876	46.8617
EVIIANAYFFPGYR	1xiTRAQ8plex [N-Term]	1.66261e-06	0	2	A0A085DFD7	0	1964.06	107.1	100.3	96.8	101	95.3	99.5	27.82	3	2.39727	47.0102
SFFVGNNHMVEDVENFIK	2xiTRAQ8plex [N-Term; K18]; 2xDeamidated [N15; N]	0.00015816	0	2	A0A2G8ABH6	0	2736.38	107.7	106.5	109.5	99.9	87	89.4	28.81	4	4.7735	49.205
LVLVDDALADQQAIGK	2xiTRAQ8plex [N-Term; K16]	2.29381e-06	0	1	A0A060VFW6	0	2277.33	95.7	102.7	105.8	91.9	109.6	94.4	31.35	3	0.38854	48.029
NENTGLVVKEDISELSQAIYR	2xiTRAQ8plex [N-Term; K9]; 1xDeamidated [N3]	6.13319e-05	0	1	A7M6Y0	1	2987.61	131.8	118.4	123.6	74.7	89.2	62.2	23.3	4	6.73928	48.0251
GNPVVQTEDATSLIHIVLTGSTTPAVK	2xiTRAQ8plex [N-Term; K27]	9.00069e-05	0	1	A0A0E1CDQ5	0	3356.89	98	102.3	108	98.3	101	92.3	19.92	5	0.10216	48.9001
AEQLIEQGIITDGMIVK	2xiTRAQ8plex [N-Term; K17]	7.87536e-09	0	4	A0A236B484	0	2466.41	102.4	100.5	101.2	98.7	105.1	92.1	61.02	3	-1.10653	48.8987
NQSVGENYTTDMAITNTLIHELDVLR	1xiTRAQ8plex [N-Term]; 2xDeamidated [N7; N16]	1.22294e-07	0	1	C8TCI4	0	3253.62	100.6	92.8	81.7	108	127.2	89.7	62.03	4	3.16641	52.81
NQSVGENYTTDMAITNTLIHELDVLR	1xiTRAQ8plex [N-Term]; 1xDeamidated [N]	6.12182e-09	0	2	C8TCI4	0	3252.64	91.1	104.3	88.3	89.6	122.3	104.3	60.21	3	2.96731	52.561
NQSVGENYTTDMAITNTLIHELDVLR	1xiTRAQ8plex [N-Term]	3.20238e-13	0	2	C8TCI4	0	3251.65	99.7	89.3	96.7	108.8	92.8	112.7	102.09	3	-0.0703994	51.5418
DDVRPLNTDPNVLVMPADGVISQLGAIENNK	2xiTRAQ8plex [N-Term; K31]; 1xOxidation [M15]; 1xDeamidated [N30]	7.58721e-06	0	1	A0A2D3CYE2	0	3930.07	84.2	87.7	99.6	96.2	122.9	109.3	19.08	4	1.37748	48.8843
DDVRPLNTDPNVLVMPADGVISQLGAIENNK	2xiTRAQ8plex [N-Term; K31]; 3xDeamidated [Q23; N30; N]	2.85152e-07	0	2	A0A2D3CYE2	0	3916.05	89.7	104.6	104.8	100.2	105.9	94.8	22.28	5	8.71138	49.9617
DDVRPLNTDPNVLVMPADGVISQLGAIENNK	2xiTRAQ8plex [N-Term; K31]; 1xDeamidated [N]	2.01115e-08	0	4	A0A2D3CYE2	0	3914.08							39.02	3	-4.2009	49.9896
DDVRPLNTDPNVLVMPADGVISQLGAIENDK	2xiTRAQ8plex [N-Term; K31]; 1xOxidation [M15]	7.1743e-06	0	1	A0A2D2GE08; A0A169HNE2	0	3930.07							19.98	4	1.37758	48.8843
DDVRPLNTDPNVLVMPADGVISQLGAIENDK	2xiTRAQ8plex [N-Term; K31]; 2xDeamidated [Q23; N]	2.85152e-07	0	2	A0A2D2GE08; A0A169HNE2	0	3916.05							22.28	5	8.71149	49.9617
DDVRPLNTDPNVLVMPADGVISQLGAIENDK	2xiTRAQ8plex [N-Term; K31]	2.01115e-08	0	2	A0A2D2GE08; A0A169HNE2	0	3914.08							39.02	3	-4.20079	49.9896
ALSESEGDDYLAGSNAPIDGWVASSLR	1xiTRAQ8plex [N-Term]	2.77851e-10	0	1	A0A0E1CDQ5	0	3084.51	114.7	99.1	98.6	106.5	89.6	91.5	89.3	3	1.5842	48.8802
YALTDAWNVYLSAGR	1xiTRAQ8plex [N-Term]	7.23115e-07	0	1	A0A060VHK0	0	2004.05	114.9	97.8	86.4	100.8	108.1	92.1	45.64	3	1.93001	48.8604
SNLIGMGILPLEFPQGVTR	1xiTRAQ8plex [N-Term]; 1xOxidation [M6]	9.91398e-08	0	3	A0A0H3GRP5; A0A060VLI1; W1B6A7; A0A1S9BPB3; A0A181RH77; A0A1Y0PZ95	0	2362.31	96.1	103.6	98.8	96.8	114.9	89.8	38.27	2	-1.75185	48.8379
SNLIGMGILPLEFPQGVTR	1xiTRAQ8plex [N-Term]; 1xDeamidated [Q/N]	1.0339e-07	0	3	A0A0H3GRP5; A0A060VLI1; W1B6A7; A0A1S9BPB3; A0A181RH77; A0A1Y0PZ95	0	2347.3	100.5	92.5	95.4	101	113.6	97.1	50.54	2	3.4002	51.3939
SNLIGMGILPLEFPQGVTR	1xiTRAQ8plex [N-Term]	3.09018e-12	0	6	A0A0H3GRP5; A0A060VLI1; W1B6A7; A0A1S9BPB3; A0A181RH77; A0A1Y0PZ95	0	2346.32	94.3	97.4	94.2	102.1	107	105	79.57	2	-0.289175	50.7979
DLGILTVAVVTKPFNFEGK	3xiTRAQ8plex [N-Term; K12; K19]; 1xDeamidated [N15]	1.1463e-05	0	3	W1DWW0; A0A181RQQ5	0	2961.74	87.3	96.3	95.3	112	97.4	111.7	43.87	2	3.28845	48.8771
DLGILTVAVVTKPFNFEGK	3xiTRAQ8plex [N-Term; K12; K19]	2.3805e-09	0	3	W1DWW0; A0A181RQQ5	0	2960.76	92.3	98.1	94.4	115.9	93.1	106.1	41.46	3	0.401379	48.8644
LLVLEFSKPIIEPLSK	3xiTRAQ8plex [N-Term; K8; K16]	9.23755e-07	0	8	A0A2D3CZ30	0	2738.72	106.1	111.2	109.1	97.5	84.9	91.3	54.82	2	-1.53543	48.8788
GAVQGIAELITRPGLMNVDFADVR	1xiTRAQ8plex [N-Term]; 1xOxidation [M16]	0.000190766	0	1	W1DWW0; A0A181RQQ5	0	2862.54	67.4	59.3	59.9	134	139	140.5	25.07	3	-0.126977	48.8062
GAVQGIAELITRPGLMNVDFADVR	1xiTRAQ8plex [N-Term]	1.03602e-10	0	3	W1DWW0; A0A181RQQ5	0	2846.55	61.3	56.7	63.6	136.9	139.8	141.6	60.19	2	-0.301205	50.6098
FINTMSQVPTITQLLPLPASEDADLKR	2xiTRAQ8plex [N-Term; K26]; 1xOxidation [M5]	2.06248e-05	0	1	A0A2G8AFF4	1	3623	87.7	77.3	86.8	116	128.8	103.3	23.18	5	8.0429	48.7995
FINTMSQVPTITQLLPLPASEDADLKR	2xiTRAQ8plex [N-Term; K26]; 1xDeamidated [Q13]	6.99697e-10	0	2	A0A2G8AFF4	1	3607.99	60.3	59.5	59.9	146.3	132.6	141.3	60.3	3	3.99961	50.6364
FINTMSQVPTITQLLPLPASEDADLKR	2xiTRAQ8plex [N-Term; K26]	1.84792e-07	0	1	A0A2G8AFF4	1	3607	67.9	65.1	65.6	138.9	126	136.6	22.65	5	-1.97797	50.6337
AKGMNTAVGDEGGYAPNLGSNAEALAVIAEAVK	3xiTRAQ8plex [N-Term; K2; K33]; 1xOxidation [M4]; 3xDeamidated [N5; N17; N21]	2.30992e-06	0	2		1	4120.15							37.74	4	13.0912	48.8195
AKGMNTAVGDEGGYAPNLGSNAEALAVIAEAVK	3xiTRAQ8plex [N-Term; K2; K33]; 1xOxidation [M4]	1.82092e-06	0	1		1	4117.2							22	4	-3.64579	47.3265
LSPFFDEMGAEPLPVEDIR	1xiTRAQ8plex [N-Term]; 1xOxidation [M8]	1.70768e-05	0	4	A0A181RH77; A0A1Y0PZ95	0	2482.25	83.7	86.3	87.1	116	118.9	108	33.64	3	-3.56236	49.0201
LSPFFDEMGAEPLPVEDIR	1xiTRAQ8plex [N-Term]	4.23659e-13	0	3	A0A181RH77; A0A1Y0PZ95	0	2466.25	83	88.4	87	112.4	117.2	112	88.37	2	-1.50891	50.8896
YLNLLDYSHNVLLASDVAK	2xiTRAQ8plex [N-Term; K19]; 1xDeamidated [N10]	3.34679e-06	0	1	W1EF35	0	2757.53	89.8	88.6	88.7	121.5	120.5	90.9	34.74	3	7.88412	48.7931
YDVSSTGTGGGGGEYPLQDGFGWTNGVTLK	2xiTRAQ8plex [N-Term; K30]; 1xDeamidated [N25]	4.41222e-11	0	4	A0A263K3L2; A0A1E3F192; A0A2G8LYF0	0	3629.79	89.2	96.4	97	109.9	102.8	104.8	57.86	4	-1.151	48.8547
YDVSSTGTGGGGGEYPLQDGFGWTNGVTLK	2xiTRAQ8plex [N-Term; K30]; 2xDeamidated [Q18; N25]	6.1648e-09	0	3	A0A263K3L2; A0A1E3F192; A0A2G8LYF0	0	3630.77	87.1	99.5	97.8	108.3	97.6	109.7	81.02	3	3.77651	48.7977
NFFDHVDIPAENINLLNGNAPDIDAECR	1xiTRAQ8plex [N-Term]; 2xDeamidated [N]; 1xCarbamidomethyl [C27]	1.77679e-11	0	16	A0A0E1CHV5	0	3489.65	98.9	96.9	102.4	87	118.4	96.4	73.09	4	7.78577	49.4784
NFFDHVDIPAENINLLNGNAPDIDAECR	1xiTRAQ8plex [N-Term]; 3xDeamidated [N]; 1xCarbamidomethyl [C27]	5.21896e-11	0	7	A0A0E1CHV5	0	3490.64	107.8	108.3	105.5	99.5	97.9	80.9	57.05	3	9.62133	48.9879
VTDLGNVENGKPTLVNGDIVFFNSLR	2xiTRAQ8plex [N-Term; K11]; 4xDeamidated [N6; N9; N16; N23]	1.0178e-05	0	1	Q6U658; A0A1Y0Q858	0	3430.82	127	132.1	121.6	69.4	74.8	75	44.79	3	9.57025	49.1624
VTDLGNVENGKPTLVNGDIVFFNSLR	2xiTRAQ8plex [N-Term; K11]; 3xDeamidated [N9; N16; N23]	4.40621e-09	0	1	Q6U658; A0A1Y0Q858	0	3429.84	133.3	115.1	97.1	90.2	84	80.2	52.17	4	-3.22368	49.2063
VTDLGNVENGKPTLVNGDIVFFNSLR	2xiTRAQ8plex [N-Term; K11]; 2xDeamidated [N]	3.70923e-13	0	6	Q6U658; A0A1Y0Q858	0	3428.85	123.1	133.2	130.2	73.4	68.9	71.2	80.38	4	3.07886	49.6277
VTDLGNVENGKPTLVNGDIVFFNSLR	2xiTRAQ8plex [N-Term; K11]; 1xDeamidated [N]	5.54681e-08	0	2	Q6U658; A0A1Y0Q858	0	3427.87	119.2	124.5	119.8	81.6	80.5	74.5	39.69	5	-5.23728	49.6304
DGTMTLVGAPTTPHPSPEVFNLIFR	1xiTRAQ8plex [N-Term]	5.17551e-09	0	1	A0A1B2ZSA2	0	3001.58	131.6	124.4	134.8	69.6	69.2	70.5	56.84	3	-3.19842	49.1454
VTILDEILIAHTINR	1xiTRAQ8plex [N-Term]	5.44698e-05	0	1	A0A2A5IMD6	0	2025.2	122.2	119.2	114.2	75.7	92.4	76.3	16.44	3	1.75118	49.144
GVVVAIDKDVVLVDAGLKSESAIPAEQFK	4xiTRAQ8plex [N-Term; K8; K18; K29]; 1xDeamidated [Q27]	0.000150651	0	3	A0A1Y0Q2E3	2	4215.46	106.4	117.6	112.4	91.2	88.4	84.1	19.64	6	4.75771	49.1955
GVVVAIDKDVVLVDAGLKSESAIPAEQFK	4xiTRAQ8plex [N-Term; K8; K18; K29]	9.22863e-06	0	1	A0A1Y0Q2E3	2	4214.47	105.4	117.2	107.5	98.2	84.2	87.6	26.69	4	-3.54592	49.2845
RGEVLLEASENVWGDLIDK	2xiTRAQ8plex [N-Term; K19]; 1xDeamidated [N11]	4.68233e-06	0	1	W1GKD2	1	2752.5	127.9	119.9	102.8	88.6	87.7	73.1	31.65	4	3.01282	49.1333
EVGFFYITGHGIDPALIAGVR	1xiTRAQ8plex [N-Term]	3.21169e-07	0	1	A0A1W1LCA4	0	2536.39	87.6	71	76.3	116.3	126.9	121.9	41.3	3	0.763963	49.1215
GVLTALPIATQGAGEPIGILTR	1xiTRAQ8plex [N-Term]	2.55476e-10	0	2	A0A060VHK5	0	2452.44	103.7	106.3	91.4	91.3	115.7	91.6	69.08	3	-2.80173	49.1175
GWMVVEAEQDPALANPFEYAVK	2xiTRAQ8plex [N-Term; K22]; 1xOxidation [M3]; 2xDeamidated [Q9; N15]	0.000103465	0	2	A0A060VJB8; W1HY46	0	3090.56	93.5	91.3	86.1	105.4	114.4	109.3	16.12	4	9.16056	49.2044
GWMVVEAEQDPALANPFEYAVK	2xiTRAQ8plex [N-Term; K22]	1.03461e-08	0	2	A0A060VJB8; W1HY46	0	3072.6	85.5	92.2	89.5	115.3	111.8	105.7	79.88	2	-1.28689	50.7993
AVVTNDSGLMHVAAALNRPLVALYGPSSPDFTPPLSHK	2xiTRAQ8plex [N-Term; K38]; 2xDeamidated [N5; N17]	2.84936e-06	0	1		0	4553.43							17.95	5	2.19352	49.1044
YLNLLDYSHNVLLASDVAK	2xiTRAQ8plex [N-Term; K19]	8.02387e-06	0	1	W1EF35	0	2756.54	93.9	95	100.2	107.7	114.8	88.5	26.22	4	0.555701	48.7547
AVVTNDSGLMHVAAALNRPLVALYGPSSPDFTPPLSHK	2xiTRAQ8plex [N-Term; K38]; 1xDeamidated [N17]	2.11354e-09	0	2		0	4552.45							26.37	6	-0.502208	49.136
AVVTNDSGLMHVAAALDRPLVALYGPSSPDFTPPLSHK	2xiTRAQ8plex [N-Term; K38]	2.11354e-09	0	2	A0A098C8K3; A0A235TFZ5	0	4552.45	89.7	107.4	101.7	101.9	96.6	102.7	26.37	6	-0.502113	49.136
QLMDSTLILHYFETTNPAGR	1xiTRAQ8plex [N-Term]; 1xDeamidated [N16]	3.13704e-05	0	1	A0A1B2ZHK2	0	2612.33	98.1	100.5	102.3	103.3	101.5	94.3	32.71	3	8.10575	49.0873
CAEAAQQGYANATELADYLVAK	2xiTRAQ8plex [N-Term; K22]; 1xCarbamidomethyl [C1]	2.28263e-09	0	1	A0A1Y0Q7A9	0	2965.52	91.2	97.2	102.6	107.5	96	105.6	64.25	3	0.969644	49.0675
EQVQSMGAEFLELDFK	2xiTRAQ8plex [N-Term; K16]	8.80221e-08	0	1	W9B888	0	2479.3	91.9	103.4	97.9	112.2	106.1	88.4	67.52	3	-2.22453	49.0584
RLGGEVHDAAFIINLFDLGGEQR	1xiTRAQ8plex [N-Term]	3.79891e-07	0	2	W1EN13; A0A1B2ZWQ0	1	2831.51	74.8	81.3	96.5	103.1	111.6	132.7	45.13	4	0.461321	49.0504
VWTGGGDEAALAQGVYNTYTEDNLR	1xiTRAQ8plex [N-Term]; 1xDeamidated [N17]	3.28207e-08	0	1	A0A2G8APA8	0	3005.44	86.1	88.4	86.6	121.9	111.9	105.2	57.11	3	-1.71347	49.0228
TLLADDPDYSFDILEAR	1xiTRAQ8plex [N-Term]	1.63752e-05	0	1	A0A0J4QMC9	0	2258.15	97.2	86.7	82.6	115.4	107.6	110.4	35.93	3	-7.10239	49.0084
AGKPYLALNCGSIPEDAVESELFGDALQGK	3xiTRAQ8plex [N-Term; K3; K30]; 2xDeamidated [N9; Q28]; 1xCarbamidomethyl [C10]	2.62189e-07	0	2	A0A060VLS7	0	4064.13	114.8	114.4	119.2	86.7	80.9	84	31.82	4	3.83433	49.0071
AGKPYLALNCGSIPEDAVESELFGDALQGK	3xiTRAQ8plex [N-Term; K3; K30]; 1xDeamidated [N9]; 1xCarbamidomethyl [C10]	1.59235e-05	0	1	A0A060VLS7	0	4063.15	124.3	108.9	135.3	85.1	57	89.3	30.76	3	-2.03312	49.0701
DNEVDKILGLEIGADDYITKPFNPR	3xiTRAQ8plex [N-Term; K6; K20]; 2xDeamidated [N2; N23]	0.000239774	0	1	W1DG72	1	3747.03	84.5	99.3	102.6	112.2	99.7	101.7	19.53	3	5.10407	47.7132
DNEVDKILGLEIGADDYITKPFNPR	3xiTRAQ8plex [N-Term; K6; K20]; 1xDeamidated [N2]	5.38999e-07	0	2	W1DG72	1	3746.04	82.6	86.6	95.4	112.8	112.6	110	25.67	4	1.86139	47.6551
DNEVDKILGLEIGADDYITKPFNPR	3xiTRAQ8plex [N-Term; K6; K20]	7.39474e-09	0	3	W1DG72	1	3745.06	102.9	99.9	101.2	110.4	94.2	91.4	28.27	5	-2.60531	47.7434
ANAALEPWVLFTR	1xiTRAQ8plex [N-Term]	1.43543e-06	0	2	A0A1C8Y8C9	0	1792.01	40.2	33.4	35.6	159.9	172.2	158.7	44.66	3	-3.33288	49.0148
NFFDHVDIPAENINLLNGNAPDIDAECR	1xiTRAQ8plex [N-Term]; 4xDeamidated [N12; N14; N17; N19]; 1xCarbamidomethyl [C27]	1.54162e-08	0	1	A0A0E1CHV5	0	3491.62	98.5	106.8	114.3	92.8	99.8	87.8	53.35	5	16.8982	49.06
AVVTNDSGLMHVAAALDRPLVALYGPSSPDFTPPLSHK	2xiTRAQ8plex [N-Term; K38]; 1xDeamidated [N5]	2.84936e-06	0	1	A0A098C8K3; A0A235TFZ5	0	4553.43	90.1	97	109.4	111.7	87.7	104	17.95	5	2.19361	49.1044
GMLATDLFSTLR	1xiTRAQ8plex [N-Term]	5.27804e-07	0	2	A0A0A8IKC4	0	1628.9	79.3	85.7	84	103.2	142.3	105.5	59.78	3	0.475139	46.6825
DNITLDLGNNAEAVILREDMLPR	1xiTRAQ8plex [N-Term]	1.84792e-07	0	2	C8T5K7	1	2886.53	95.9	98.4	95.8	95.9	108.2	105.8	33.72	3	3.12962	48.8006
CGVVKEEAAEGVEDIMHTLAAR	2xiTRAQ8plex [N-Term; K5]; 1xCarbamidomethyl [C1]	1.15066e-10	0	1	W1HLH3	1	2993.56	95.3	103.2	103.3	103.3	103.2	91.7	41.45	4	0.954096	48.7321
DGVDYHVSADLTGQANHLAATIGADIVK	3xiTRAQ8plex [N-Term; Y5; K28]; 1xDeamidated [Q/N]	3.16924e-08	0	11	C8SYF0	0	3765.02	113.3	105.6	104.9	104.9	86.7	84.6	13.94	4	0.114853	43.3088
DGVDYHVSADLTGQANHLAATIGADIVK	3xiTRAQ8plex [N-Term; Y5; K28]	4.98661e-06	0	2	C8SYF0	0	3764.04	115.9	103.3	96.1	107.1	83.6	94	10.65	4	3.52202	44.1174
DGVDYHVSADLTGQANHLAATIGADIVK	2xiTRAQ8plex [N-Term; K28]; 2xDeamidated [Q14; N16]	1.60771e-08	0	11	C8SYF0	0	3461.8	91.2	106.2	105.6	96.4	101.7	98.8	70.96	3	5.16246	45.5176
DGVDYHVSADLTGQANHLAATIGADIVK	2xiTRAQ8plex [N-Term; K28]; 1xDeamidated [N/Q]	5.63265e-10	0	31	C8SYF0	0	3460.82	92.7	98.3	102.8	104.5	99	102.7	58.87	3	6.01254	45.0016
DGVDYHVSADLTGQANHLAATIGADIVK	2xiTRAQ8plex [N-Term; K28]	7.83111e-11	0	33	C8SYF0	0	3459.83	94.7	104.7	106.4	102	92.1	100.2	42.68	4	0.949464	45.9822
LTEADWDTVIDVNLK	2xiTRAQ8plex [N-Term; K15]	1.79334e-05	0	1	A0A0W8ADZ1; A6T954	0	2340.29	97.7	96.5	100.2	98.5	109.9	97.2	34.86	3	-2.55284	48.3414
LPEYLGFFAGK	2xiTRAQ8plex [N-Term; K11]	0.000223736	0	1	W1EP24	0	1850.07	127.3	135.3	135.1	62.2	68.1	72	26.81	3	-3.74604	48.3217
MIPLVQGILDK	2xiTRAQ8plex [N-Term; K11]	0.000320475	0	2	A0A2D1J7Y6; A0A081LUT9	0	1835.13	101.7	113	114.7	87	93.5	90.1	27.02	3	-2.11453	48.6359
ANFNWAPTWLPQGVTEVSSSQR	1xiTRAQ8plex [N-Term]; 1xDeamidated [N4]	2.8847e-05	0	1	W1E2L9	0	2780.39	82.7	106	95.7	94.4	109.1	112.1	35.39	2	5.63982	48.3114
ANFNWAPTWLPQGVTEVSSSQR	1xiTRAQ8plex [N-Term]	2.34582e-08	0	2	W1E2L9	0	2779.41	112.9	85.1	105.6	94.6	113.1	88.7	51.94	3	0.0398352	48.2704
WTVNLDMPALSLR	1xiTRAQ8plex [N-Term]	5.26013e-05	0	1	A0A060VP92; C8SYS6	0	1820	91.9	99.3	100.7	103	101.7	103.4	26.56	2	-0.990715	48.269
IATHILDYQDEGKVEFFEGNFTEYEEYK	3xiTRAQ8plex [N-Term; K13; K28]; 2xDeamidated [Q9; N20]	1.01243e-07	0	3	A0A181W368	1	4329.15	94.4	107.3	110.6	101.7	97	88.9	38.25	5	10.4309	48.7624
IATHILDYQDEGKVEFFEGNFTEYEEYK	3xiTRAQ8plex [N-Term; K13; K28]; 1xDeamidated [N/Q]	0.000136679	0	3	A0A181W368	1	4328.17	100.9	110.3	108.1	98.9	90.4	91.5	23.59	3	3.48894	48.3998
IATHILDYQDEGKVEFFEGNFTEYEEYK	3xiTRAQ8plex [N-Term; K13; K28]	1.72305e-07	0	1	A0A181W368	1	4327.18	136.7	107.4	116.9	95.7	72.1	71.1	26.4	5	2.45551	48.4474
EAEAFEDKFWSGIELSR	2xiTRAQ8plex [N-Term; K8]	9.907e-07	0	1	A0A0W7ZZF0	1	2622.37	107.1	105.8	102.6	91.3	98.7	94.5	25.44	4	-3.85565	48.2308
LFIDYLSPLK	2xiTRAQ8plex [N-Term; K10]	2.50838e-05	0	4	A0A210V0A7; W9B258	0	1817.1	108	110.8	110.4	94.2	84.6	92.1	30.72	2	-4.80292	48.2849
DGPSAGIAMCTALVSCLTGNPVR	1xiTRAQ8plex [N-Term]; 2xCarbamidomethyl [C10; C16]	1.01243e-07	0	2	A0A0E1CJ09	0	2651.33	109.6	99.3	103.9	95.4	96.4	95.4	60.21	2	4.26376	48.2758
TLTLSGMLAEAIR	1xiTRAQ8plex [N-Term]; 1xOxidation [M7]	0.000126611	0	2	W9BHR9	0	1695.96	95.7	93.1	96.9	98.3	114.3	101.7	37.96	2	-2.6876	36.7115
TLTLSGMLAEAIR	1xiTRAQ8plex [N-Term]	1.96938e-08	0	5	W9BHR9	0	1679.97	95.5	97	96.8	105.4	99.8	105.6	76.49	3	1.26387	48.6701
FDSISMYYLIHCLPGTMEDKR	2xiTRAQ8plex [N-Term; K20]; 1xCarbamidomethyl [C12]	1.09153e-05	0	1	J2DFE2	1	3184.61	137	152.9	156.3	52.3	54.1	47.4	17.63	4	-2.26948	48.137
YASVSAFAPIVNPSQVPWGK	2xiTRAQ8plex [N-Term; K20]; 2xDeamidated [N12; Q15]	1.52872e-06	0	1	A0A2A2SP60; A0A2D3CAH6	0	2728.48	99.1	107.2	110.7	96.4	88.9	97.6	44.86	4	10.0246	48.3586
YASVSAFAPIVNPSQVPWGK	2xiTRAQ8plex [N-Term; K20]; 1xDeamidated [N12]	2.06248e-05	0	1	A0A2A2SP60; A0A2D3CAH6	0	2727.5	88.3	99.4	99.2	104.5	106.9	101.8	43.61	2	6.63933	48.2837
YASVSAFAPIVNPSQVPWGK	2xiTRAQ8plex [N-Term; K20]	1.0178e-05	0	1	A0A2A2SP60; A0A2D3CAH6	0	2726.51	95.5	94.3	105.8	105.2	97.3	102	28.56	3	2.34137	48.1252
ALMQEALLAVVR	1xiTRAQ8plex [N-Term]	7.80965e-07	0	2	W1HQF7; A0A1B2ZX52	0	1617.97	96.1	101.6	99	100	97.4	105.9	74.1	3	-1.87709	48.1186
ATGLEVNAMLSGPMGGDQQVGALISEGK	2xiTRAQ8plex [N-Term; K28]; 3xDeamidated [N7; Q18; Q19]	7.43638e-07	0	2	A0A0E1CL90	0	3341.71	179.9	80.8	75.6	73	117.8	72.9	68.22	3	8.38248	48.1835
ATGLEVNAMLSGPMGGDQQVGALISEGK	2xiTRAQ8plex [N-Term; K28]; 1xDeamidated [Q/N]	7.66845e-11	0	3	A0A0E1CL90	0	3339.74	112.2	96	102.3	104	95.6	89.9	81.8	3	5.76008	49.1357
NLLDTAVLDGVELDAAR	1xiTRAQ8plex [N-Term]	5.06801e-09	0	1	V0AJA2	0	2089.14	101.2	82.1	87.8	100.9	129	99	80.88	3	-0.627461	48.1029
SNLSVGLPLDTLLYR	1xiTRAQ8plex [N-Term]	0.000177978	0	1	A0A0H3GUL5	0	1965.13	113.2	85.8	91.5	96	118.5	95.1	35.64	2	0.332247	48.0715
ELAAFSQFASDLDDATR	1xiTRAQ8plex [N-Term]	7.83645e-12	0	6	W1ANR8; A0A0V9I722	0	2161.07	94	93.8	95.5	102.7	98.5	115.5	82.03	2	-1.75039	50.6918
DGVDYHVSADLTGQANHLAATIGADIVK	3xiTRAQ8plex [N-Term; Y5; K28]; 2xDeamidated [Q14; N16]	1.42542e-06	0	3	C8SYF0	0	3766.01	105.4	120.2	106.8	98.3	87.9	81.4	12.69	4	9.15634	41.7592
IETGTFLVAAAISGGK	2xiTRAQ8plex [N-Term; K16]	2.24617e-06	0	3	A0A1C3Q8D2	0	2143.26	85.9	83.5	88.7	113	113.1	115.8	31.61	3	-3.74991	48.9343
IDAAFQDEVAASEGFLKQPIGK	3xiTRAQ8plex [N-Term; K17; K22]; 1xDeamidated [Q18]	4.39662e-06	0	1	B5XNT0	1	3247.8	110.1	123.2	120.9	86.8	82.5	76.5	31.36	4	7.23251	48.4511
IVDFGAFVAIGGGK	2xiTRAQ8plex [N-Term; K14]	3.40124e-09	0	8	W9BCF4; W1HWR6	0	1959.15	104.7	104.9	107.1	98.2	91.3	93.8	65.9	2	-1.21627	49.0319
AFFTELLAAGVK	2xiTRAQ8plex [N-Term; K12]	2.52985e-06	0	2	A0A1C3Q1K8	0	1875.12	101.9	108.6	108.9	93.8	90.3	96.4	45.54	3	0.35706	48.7281
CTVACMPVPIEEASAFGVMAVDENEK	2xiTRAQ8plex [N-Term; K26]; 2xCarbamidomethyl [C1; C5]	1.36012e-09	0	2	J2DH15	0	3462.69	105.8	105.6	103.3	96.3	99.8	89.2	69.59	4	-0.823081	50.0302
NQLTAAALFPLYVNAASR	1xiTRAQ8plex [N-Term]; 1xDeamidated [N/Q]	2.10024e-10	0	8	A0A263K3L2; A0A1E3F192; A0A2G8LYF0	0	2225.22	88.5	91.1	87.2	113.6	113.1	106.5	87.81	2	0.897652	48.752
NQLTAAALFPLYVNAASR	1xiTRAQ8plex [N-Term]	7.67367e-12	0	6	A0A263K3L2; A0A1E3F192; A0A2G8LYF0	0	2224.24	84	82.5	84.7	113	121.1	114.7	82.73	2	1.28546	48.6696
LPTPEEYQTFVAQVDKTAEDTYR	2xiTRAQ8plex [N-Term; K16]	1.22207e-06	0	2	W9BCI4; A0A231WHP5	1	3309.71	98	99.8	94.5	102.3	107.8	97.8	30.18	4	1.76229	48.6899
DSIPSVAPLYFAFR	1xiTRAQ8plex [N-Term]	6.64298e-06	0	2	A0A060VFJ1	0	1887.03	97.7	94.8	95	105.1	101	106.4	54.96	3	-2.00141	48.7313
LTEGIATLGAAFYPK	2xiTRAQ8plex [N-Term; K15]	1.31336e-09	0	5	A0A1Y0Q072; A0A060VL74	0	2160.25	109.5	117.7	111.8	93	81.1	86.9	79.34	2	-0.88174	48.715
LQEQFAIETLIPEADDR	1xiTRAQ8plex [N-Term]	1.68957e-09	0	1	V0B7X3; A0A060VEG5	0	2292.2	92.9	84.4	91.6	102.1	128.1	100.9	71.42	3	1.76455	48.7493
TELEELGFEALYPNR	1xiTRAQ8plex [N-Term]	6.151e-06	0	1	A6TFP9	0	2085.08	110.7	102.8	100.8	92.6	115.4	77.7	45.2	3	-2.73477	48.6083
QFNQLVDNLACSLQR	1xiTRAQ8plex [N-Term]; 1xCarbamidomethyl [C11]	2.35891e-06	0	1	A0A099PVJ2	0	2110.1	92.4	80.7	90.7	104.2	113.3	118.6	35.43	3	-1.00986	48.6017
ICDCVAVISNGQLIEQDTVSEVFSHPK	2xiTRAQ8plex [N-Term; K27]; 3xDeamidated [N10; Q12; Q16]; 2xCarbamidomethyl [C2; C4]	2.22734e-05	0	1	A0A1W1KN77	0	3656.83	103.3	104	103.5	97.6	82.7	108.8	43.17	3	10.776	48.6636
ICDCVAVISNGQLIEQDTVSEVFSHPK	2xiTRAQ8plex [N-Term; K27]; 2xDeamidated [N/Q]; 2xCarbamidomethyl [C2; C4]	5.57717e-06	0	3	A0A1W1KN77	0	3655.84	97.3	97.8	107.2	89.2	127.4	81	32.77	4	11.6954	48.5886
ICDCVAVISNGQLIEQDTVSEVFSHPK	2xiTRAQ8plex [N-Term; K27]; 1xDeamidated [Q/N]; 2xCarbamidomethyl [C2; C4]	4.05137e-09	0	6	A0A1W1KN77	0	3654.86	92.7	103.5	101.1	87.9	116.8	97.9	46.43	5	2.42854	48.7295
ICDCVAVISNGELIEQDTVSEVFSHPK	2xiTRAQ8plex [N-Term; K27]; 2xDeamidated [N10; Q16]; 2xCarbamidomethyl [C2; C4]	2.22734e-05	0	1		0	3656.83							43.17	3	10.7761	48.6636
VTILDEILITHTINR	1xiTRAQ8plex [N-Term]	2.0944e-06	0	1	A0A2D2EFB4	0	2055.21	105.2	89.4	87.8	102.1	114.4	101.1	49.09	3	-1.36567	48.7335
ICDCVAVISNGELIEQDTVSEVFSHPK	2xiTRAQ8plex [N-Term; K27]; 1xDeamidated [Q/N]; 2xCarbamidomethyl [C2; C4]	5.57717e-06	0	2		0	3655.84							32.77	4	11.6956	48.5886
YPFAEGGIVLFCQYR	1xiTRAQ8plex [N-Term]; 1xCarbamidomethyl [C12]	1.16449e-07	0	1	A0A0V9IF82	0	2124.09	121.1	107	101.1	89.1	102	79.8	35.72	3	2.32745	48.5991
TLEWATSSPPPFYNFAIVPQVHER	1xiTRAQ8plex [N-Term]; 1xDeamidated [N14]	4.31175e-08	0	1	A0A098C602	0	3091.58	96.1	110.9	93.6	92	106.5	100.8	45.45	3	4.87316	49.0648
TLEWATSSPPPFYNFAIVPQVHER	1xiTRAQ8plex [N-Term]	1.42037e-11	0	5	A0A098C602	0	3090.6	99.4	106.7	108.7	94.2	95.8	95.2	65.8	4	0.705726	49.0717
LSAPAETVMLALNASQGPTR	1xiTRAQ8plex [N-Term]	1.11583e-06	0	1	A0A0C7K6D8	0	2331.26	85.9	89.5	90.9	113.6	115.3	104.9	51.17	3	2.04953	48.5476
FVNLTTDGATELASFNER	1xiTRAQ8plex [N-Term]; 1xDeamidated [N]	3.39658e-07	0	4	A0A2D1J508; B5XRE7; J2E589	0	2290.15	94.4	101.8	96.6	94.3	118.8	94.1	38.8	3	0.874487	48.5462
FVNLTTDGATELASFNER	1xiTRAQ8plex [N-Term]	1.0145e-10	0	4	A0A2D1J508; B5XRE7; J2E589	0	2289.17	96.9	100.8	100.7	106.4	96	99.3	82.74	2	0.697249	46.4495
CIVSQLAFADGEEIVTGNMNNEEK	2xiTRAQ8plex [N-Term; K24]; 1xDeamidated [Q5]; 1xCarbamidomethyl [C1]	2.8847e-05	0	1	Q6U638	0	3277.62	138.9	136.5	139.1	74.8	75.9	34.8	32.81	3	6.55671	48.4934
CIVSQLAFADGEEIVTGNMNNEEK	2xiTRAQ8plex [N-Term; K24]; 1xCarbamidomethyl [C1]	9.31531e-09	0	1	Q6U638	0	3276.63	159	149.5	150.2	44.6	64.3	32.5	63.64	4	-3.40888	48.5647
VQPINTALIAGWGSLDPR	1xiTRAQ8plex [N-Term]	1.32259e-09	0	2	A0A1B3A0S4; A0A098CEP3	0	2212.24	110.3	109.5	106.5	91.6	84.8	97.4	71.23	3	0.624204	48.4907
DIQITLDNDVLMVR	1xiTRAQ8plex [N-Term]	4.99759e-09	0	7	W1DFB1	0	1949.07	52.9	51.1	52.9	144.6	151.9	146.5	69	3	0.413702	45.4299
LAYDDVSDWLEGR	1xiTRAQ8plex [N-Term]	2.24938e-08	0	3	W1H0W7; A0A0C7KGV1	0	1842.92	93.3	106	97.9	99.7	103.6	99.4	49.17	3	-1.39554	48.4723
ELCSAEELNALPSLAATIER	1xiTRAQ8plex [N-Term]; 1xCarbamidomethyl [C3]	5.00924e-05	0	2	A0A0U3J286	0	2491.3	82.2	76.6	98	102.4	122.8	118	28.64	3	-5.16368	48.4578
ALLQELCFGVLR	1xiTRAQ8plex [N-Term]; 1xCarbamidomethyl [C7]	1.06142e-05	0	2	A0A169R2R9; A0A1W1KPJ1	0	1722.99	92.4	99.5	95	105.1	116.9	91.1	45.06	3	-0.404739	48.4408
LLVDIIGYAK	2xiTRAQ8plex [N-Term; K10]	0.000143496	0	1	A0A2G4YG07	0	1713.08	159.8	142.2	136.5	45.5	52.7	63.3	40.08	3	-0.417151	48.4395
ICDCVAVISNGELIEQDTVSEVFSHPK	2xiTRAQ8plex [N-Term; K27]; 2xCarbamidomethyl [C2; C4]	5.03268e-09	0	2		0	3654.86							46.43	5	2.42866	48.7295
ENSLQLVMLWQAR	1xiTRAQ8plex [N-Term]	1.53764e-05	0	1	A0A060VNZ7	0	1892.04	81	80.6	87.7	117.2	132.5	100.9	45.56	2	-1.73466	46.5479
DLDGIVSEPLHYDWEALR	1xiTRAQ8plex [N-Term]	1.89099e-10	0	4	A0A2G4YLC9; W8UHC2	0	2432.24	80.7	85.2	90	115.5	115.6	112.9	58.97	3	0.444631	46.5296
NMVAAGSGITLLPALAVPQER	1xiTRAQ8plex [N-Term]	7.82045e-09	0	3	A0A1E3F4Y7; A0A0J4XAN6	0	2412.36	83.1	93	91.2	105.9	110.6	116.2	60.59	3	-0.117877	46.6231
EEKPEFDPILLRPVDDLELTVR	2xiTRAQ8plex [N-Term; K3]	1.0625e-06	0	3	B5XNB6	0	3231.81	90.3	99.3	105.5	106.1	100.9	97.9	24.97	2	-1.30928	44.4694
QLTENVLSFTENQEGDFSR	1xiTRAQ8plex [N-Term]	5.28169e-08	0	1	H6U1V5	0	2518.24	93.3	108.3	105.5	100.5	90.8	101.6	37.41	3	-1.44999	44.4284
EIFNGLSFEELQR	1xiTRAQ8plex [N-Term]; 1xDeamidated [N4]	0.000154898	0	1	A0A181P890	0	1886.98	130.5	139.8	124.9	67	70.2	67.6	34.12	2	0.143403	44.4072
QAGLGGEIICYVA	1xiTRAQ8plex [N-Term]; 1xCarbamidomethyl [C10]	7.353e-05	0	9	A0A2G3S2V0	0	1654.88	97.5	95.6	99.4	98.1	112.8	96.6	63.03	2	-0.12446	44.8819
FDKTTVAALQVSEAEIAAAGER	2xiTRAQ8plex [N-Term; K3]	4.6894e-08	0	1	A0A0C7KC58; A0A0E1CBS4	1	2885.58	101.3	105	108.7	104.5	99.4	81.1	60.62	3	11.3666	44.3676
LELINPPEDAFVDGR	1xiTRAQ8plex [N-Term]; 1xDeamidated [N5]	1.68397e-05	0	2	A0A2G3RV36; R4YII3	0	1990.04	91.4	100.1	96.7	100.4	103.6	107.8	38.48	2	11.4357	44.3121
LELINPPEDAFVDGR	1xiTRAQ8plex [N-Term]	1.58537e-08	0	5	A0A2G3RV36; R4YII3	0	1989.06	96.8	98.7	100.4	102.5	100.6	101.1	59.64	2	-0.890553	44.8505
DIVDQELLPYVQVK	2xiTRAQ8plex [N-Term; K14]	3.0989e-06	0	6	A6TEL1	0	2267.31	105.5	114.2	109.3	91.1	88.5	91.4	59.16	3	-1.0144	44.4824
IKLPEYLGFFAGK	3xiTRAQ8plex [N-Term; K2; K13]	0.000109393	0	3	W1EP24	1	2395.45	112	121.8	123.3	87	70.9	85.2	32.3	3	-4.11095	44.3545
DYQQFSLYYMHK	2xiTRAQ8plex [N-Term; K12]	1.03317e-06	0	1	A0A1S0W4Z1; A0A081IF33; A0A1W1KRL4; A0A181W7B7	0	2231.14	96.9	124.3	109.5	94.6	80.7	93.9	48.34	2	-1.25073	33.1658
FTYSYQFGLFNK	2xiTRAQ8plex [N-Term; K12]	9.65027e-05	0	3	W1HQA3; A0A236BE19	0	2123.14	97.3	104.4	98	111.5	95.4	93.4	38.51	3	-0.794089	44.2279
ALAINLVDPAAAGTVIEK	2xiTRAQ8plex [N-Term; K18]; 1xDeamidated [N5]	4.88305e-06	0	3	A0A0E1CFQ7	0	2375.4	108.2	105	102.3	97.7	89.4	97.5	44.01	4	-1.5536	46.0623
ALAINLVDPAAAGTVIEK	2xiTRAQ8plex [N-Term; K18]	3.24087e-10	0	3	A0A0E1CFQ7	0	2374.42	97.8	105.6	102.9	103.2	97.9	92.7	78.47	3	-0.64586	44.1334
VGVIVGAEQQVAEVAQK	2xiTRAQ8plex [N-Term; K17]	8.87007e-09	0	6	W9BBH5; W1DY80; W1BA39	0	2333.36	93.1	98.8	98.4	104.2	103.9	101.6	80.72	2	-2.00975	44.8479
NHFPAFTGELPNGDQYYGFPAEDNELK	2xiTRAQ8plex [N-Term; K27]; 1xDeamidated [N/Q]	8.54522e-06	0	5	A0A060VGF7	0	3679.78	79.4	84.8	80.4	121.6	119.7	114.1	16.63	4	-1.57039	44.6972
LTDAELPTTESLALTIDR	1xiTRAQ8plex [N-Term]	6.39298e-11	0	10	A0A060VFI4	0	2263.23	95.5	94.3	97.1	104.1	94.5	114.5	87.76	2	-0.21181	45.4577
EGATAPLDDQVIATFEKPFSR	2xiTRAQ8plex [N-Term; K17]	5.98128e-06	0	2	W1DG55	0	2900.56	109.8	102.7	100.1	98	97.3	92.1	37.37	4	-2.08691	44.1751
QPIWPAEALPGIRPQFTLK	2xiTRAQ8plex [N-Term; K19]	7.15069e-05	0	3	A0A2A5I9T7	0	2770.62	89.4	90.6	90.7	111.5	106.9	110.8	8.61	4	0.496558	44.1842
AEFYSEVLTVVVDGKEEK	3xiTRAQ8plex [N-Term; K15; K18]	1.17427e-09	0	8	W1DGN7; A0A236K171	1	2954.65	93.1	98.8	100.7	106.9	96.7	103.8	73.65	3	-2.27544	49.5523
GAFAMGGMAAFIPSK	2xiTRAQ8plex [N-Term; K15]	2.89171e-07	0	2	A0A0C7KLE9	0	2064.12	135.9	136.1	132.8	60.3	70.6	64.3	56.69	4	1.97304	44.1683
YLVDVILDEAANKGTGK	3xiTRAQ8plex [N-Term; K13; K17]; 1xDeamidated [N12]	1.52693e-05	0	2	S6CLP1; A0A1E1ES35; A0A193SDM6; A0A193SEK2; A0A203BH36; A7M6Y7; A0A169BB55; W9BPT6; A0A193SE39	1	2719.56	109.3	117.1	108.2	86.4	94.6	84.4	22.2	4	0.861302	44.1566
VSILAGGLEGWR	1xiTRAQ8plex [N-Term]	4.42748e-06	0	4	A0A0H3GWP1	0	1561.9	100.7	99.8	103.1	102.4	99.3	94.6	47.69	2	-0.260617	44.7342
FFFDCLAVCVNVKPAPEK	3xiTRAQ8plex [N-Term; K13; K18]; 2xCarbamidomethyl [C5; C9]	8.02387e-06	0	1	W1HQA3; A0A236BE19	0	3053.67	98.3	102.7	103.9	96.1	104.2	94.8	27.68	4	-1.88341	44.1301
DAWAESMTIFETQNDK	2xiTRAQ8plex [N-Term; K16]	6.19954e-07	0	2	A0A0E1CMF0	0	2494.24	63.7	57.1	71.8	128.1	155.1	124.3	44.45	3	0.130887	44.1011
ADVQGSVEAISDSLLK	2xiTRAQ8plex [N-Term; K16]	4.92814e-09	0	3	V0AX41	0	2240.26	102.4	109.9	105.2	95	95.1	92.4	68.49	4	0.782376	44.0772
QQAATFLNAGSAEEVVFVR	1xiTRAQ8plex [N-Term]	4.44623e-12	0	6	A0A060VTB3	0	2341.25	104.2	100.2	100.2	94.2	109.5	91.6	110.79	3	1.22321	42.9157
SLECVAYPELGMEAIWK	2xiTRAQ8plex [N-Term; K17]; 1xCarbamidomethyl [C4]	1.45566e-06	0	1	C8T5X6; A0A2G8APA8; A0A2D1HL99	0	2604.37	83.9	95.3	89.6	111.7	106.5	113	48.71	3	-4.49299	49.2124
EQANVALMFLTGRDNEVDK	2xiTRAQ8plex [N-Term; K19]; 2xDeamidated [N4; N15]	1.1475e-06	0	1		1	2760.43							28.96	4	-0.672257	44.0402
EQADVALMFLTGRDNEVDK	2xiTRAQ8plex [N-Term; K19]; 1xDeamidated [N15]	1.1475e-06	0	1	W1DG72	1	2760.43	110.3	106.1	104.8	92.7	97.7	88.5	28.96	4	-0.672101	44.0402
LAAIGELVTAR	1xiTRAQ8plex [N-Term]	2.12391e-06	0	7	J2LUI2; A0A263K3Y1	0	1417.87	96.5	101	104.8	97	102.3	98.5	72.36	3	-0.889299	43.6841
DITLAMDCAASEFYKDGKYVLAGEGNK	4xiTRAQ8plex [N-Term; K15; K18; K27]; 1xDeamidated [N26]; 1xCarbamidomethyl [C8]	0.000419054	0	1	A0A060VEA4	2	4184.2	94.9	82	87.3	110.6	88.6	136.6	16.47	5	3.45443	44.5034
QLCDQHNALLIFDEVQTGVGR	1xiTRAQ8plex [N-Term]; 1xCarbamidomethyl [C3]	1.93373e-12	0	6	A0A2D3CTA4; A0A2A5IAS5	0	2717.4	118.4	123.7	124.2	73.2	81.8	78.7	94.47	2	0.54383	42.8224
QLCDQHNALLIFDEVQTGVGR	1xiTRAQ8plex [N-Term]; 1xDeamidated [N7]; 1xCarbamidomethyl [C3]	5.66834e-09	0	3	A0A2D3CTA4; A0A2A5IAS5	0	2718.38	101.2	114.6	110.4	86.5	91.2	96.2	61.68	2	10.8243	42.5103
HHQTYVNNANAALESLPEFANLSAEELITK	2xiTRAQ8plex [N-Term; K30]; 4xDeamidated [N7; N8; N10; N21]	6.23766e-06	0	2	W1DFB0	0	3937	104.7	101.9	102.7	96.9	105.6	88.2	16.48	7	14.4707	46.8251
HHQTYVNNANAALESLPEFANLSAEELITK	2xiTRAQ8plex [N-Term; K30]; 3xDeamidated [N/Q]	4.16636e-09	0	9	W1DFB0	0	3936.01	72.6	77.2	75.7	131.3	118.8	124.4	45.83	3	10.272	46.8997
HHQTYVNNANAALESLPEFANLSAEELITK	2xiTRAQ8plex [N-Term; K30]; 2xDeamidated [N/Q]	4.92814e-09	0	29	W1DFB0	0	3935.03	103.9	110.1	102.8	94	96.7	92.5	50.87	3	0.690759	49.2876
HHQTYVNNANAALESLPEFANLSAEELITK	2xiTRAQ8plex [N-Term; K30]; 1xDeamidated [N]	2.14333e-09	0	14	W1DFB0	0	3934.04	103.5	105.1	101.4	99.4	96.2	94.4	41.91	4	-3.8254	49.2347
HHQTYVNNANAALESLPEFANLSAEELITK	2xiTRAQ8plex [N-Term; K30]	2.38212e-10	0	3	W1DFB0	0	3933.06	103.9	118.2	106.9	91.1	90	89.9	44.67	5	1.52593	45.9993
IGLLLDMPLR	1xiTRAQ8plex [N-Term]	0.000161491	0	2	A0A1Y0Q5T0; B5XYF4	0	1444.89	110.5	110.4	113.6	93.7	84.6	87.1	63.98	3	-2.19091	50.5001
KIFADLGAWQVAQLAR	2xiTRAQ8plex [N-Term; K1]	3.37522e-08	0	3	W9BIY6	1	2395.41	87.3	97.1	100	100	124.2	91.3	36.4	3	-5.28633	44.836
VSEIIGQVWR	1xiTRAQ8plex [N-Term]	2.78564e-05	0	2	A0A0H3GW32	0	1490.86	81.9	76	77.4	123.7	124.7	116.3	44.84	3	-1.07744	44.8162
LAVNCVINPLTAIK	2xiTRAQ8plex [N-Term; K14]; 1xCarbamidomethyl [C5]	2.52985e-06	0	2	A0A0E1CII8	0	2134.29	115.8	106.4	103.6	88.2	93.9	92	36.83	3	-4.38795	44.8149
IGGGHPEGLFEAWSNLYR	1xiTRAQ8plex [N-Term]	7.30189e-05	0	1	A0A1W1J4D1; A0A231WMU6	0	2307.18	117.3	106.1	108.5	92	96.5	79.7	28.93	4	1.34378	44.7963
AACNAFTDAVLDIAR	1xiTRAQ8plex [N-Term]; 1xDeamidated [N4]; 1xCarbamidomethyl [C3]	2.78564e-05	0	1	A0A1W1J737	0	1912.97	86.2	76	84.2	124.5	108.2	120.9	41.86	3	-5.14762	44.7804
AACNAFTDAVLDIAR	1xiTRAQ8plex [N-Term]; 1xCarbamidomethyl [C3]	3.16706e-07	0	4	A0A1W1J737	0	1911.99	80.2	72.8	80.3	116.1	127.3	123.3	56.66	3	-0.262386	44.7259
VTGDADFIFYNNLSAAGGSVK	2xiTRAQ8plex [N-Term; K21]; 2xDeamidated [N11; N12]	1.81859e-05	0	1	A0A263JYJ9	0	2756.42	99.1	102.2	115.1	89	99.2	95.5	23.09	4	-2.09135	44.7646
VTGDADFIFYNNLSAAGGSVK	2xiTRAQ8plex [N-Term; K21]	1.37929e-09	0	1	A0A263JYJ9	0	2754.46	102.2	110.9	108.4	87.4	99.1	92.1	59.77	3	6.20463	45.1597
GYELHYMEMNDLYLINGEAR	1xiTRAQ8plex [N-Term]; 1xDeamidated [N16]	4.6567e-08	0	3	A0A170DM99; A0A2G4Q3W8	0	2736.3	68.8	74.2	75.7	121.6	133.7	126	44.34	3	-0.777088	44.0375
GIEIVSYQGQDNIYSDLTAGR	1xiTRAQ8plex [N-Term]; 1xDeamidated [Q/N]	1.7387e-10	0	5	B5XNT0	0	2604.31	97.7	107.3	100.9	107.1	92.2	94.8	81.92	2	7.09308	44.7881
MVSLGEFGDLWLAQQSLR	1xiTRAQ8plex [N-Term]	1.9832e-08	0	2	A0A2D0AWC5	0	2354.25	135.2	134.1	142.2	54.9	70.4	63.1	58.18	3	5.59019	52.0803
HAIDGDNLFYLISEDTTEPQAAR	1xiTRAQ8plex [N-Term]; 1xDeamidated [N7]	1.60662e-07	0	1	A0A0S3FAY2	0	2881.42	105.5	89.8	105.9	103.4	112.5	82.9	43.4	3	3.69713	44.7223
VAAAMGATLLLER	1xiTRAQ8plex [N-Term]; 1xOxidation [M5]	2.63831e-06	0	1	A0A2A2NM94; A0A2D1HQ17	0	1635.94	120	104.5	102.5	84.6	107.9	80.5	52.66	3	-1.51911	35.4023
VAAAMGATLLLER	1xiTRAQ8plex [N-Term]	1.22378e-08	0	8	A0A2A2NM94; A0A2D1HQ17	0	1619.95	98.7	101	102.2	97.3	103.8	97.1	70.85	3	2.25952	45.2149
VVWQGEAADAGQVAEAVAAAR	1xiTRAQ8plex [N-Term]	3.87089e-14	0	3	A0A2D2PLH2	0	2373.25	126.6	122.7	114.4	78.3	78.4	79.7	105.57	3	-0.064004	44.6854
ALDIIVTCQGGDYTNEIYPK	2xiTRAQ8plex [N-Term; K20]; 1xCarbamidomethyl [C8]	1.28433e-07	0	4	W8UT80	0	2878.51	104.4	105.1	107.7	96	101.4	85.4	43.3	4	2.19569	44.625
ICWVGLEWR	1xiTRAQ8plex [N-Term]; 1xCarbamidomethyl [C2]	0.000126611	0	3	A0A0E1CH46; A0A0J4Y161	0	1522.81	94.6	94.9	91.7	107.5	108.8	102.5	36.67	3	-0.0619847	44.721
TIEQRPLIVMESVK	2xiTRAQ8plex [N-Term; K14]	3.1152e-05	0	2	A0A060VG41	0	2251.33	94.5	93.4	91.1	113.4	102	105.7	11.84	3	0.507583	30.5491
QKESPDYWLEYGNPWEFER	2xiTRAQ8plex [N-Term; K2]; 1xDeamidated [N13]	2.90493e-05	0	2	A0A2G4RZF0; A0A170D762	1	3082.5	99.7	94.1	101.7	99.1	114.5	91	25.85	4	3.41929	44.5604
QKESPDYWLEYGNPWEFER	2xiTRAQ8plex [N-Term; K2]	1.34634e-05	0	1	A0A2G4RZF0; A0A170D762	1	3081.52	97.6	92.6	92.5	108.3	119.7	89.2	46.11	4	3.30388	45.0683
GSIAAYVISMAK	2xiTRAQ8plex [N-Term; K12]	5.26013e-05	0	3	A0A2G4Q1K8	0	1819.06	107.9	98.9	102.8	100.9	96.2	93.3	42.37	3	-4.04703	44.5577
LIDMGEEIGLATVYR	1xiTRAQ8plex [N-Term]; 1xOxidation [M4]	4.07098e-06	0	3	A0A1Y0Q6D4	0	2000.07	93.9	92.5	97.4	101.9	108.6	105.7	53.68	2	1.767	45.0311
LIDMGEEIGLATVYR	1xiTRAQ8plex [N-Term]	1.04258e-09	0	4	A0A1Y0Q6D4	0	1984.07	98.2	100	97.9	102.8	103.1	98.2	73	3	-0.111665	50.9614
QLCDQHNALLIFDEVQTGVGR	1xiTRAQ8plex [N-Term]; 2xDeamidated [Q5; N7]; 1xCarbamidomethyl [C3]	1.07747e-06	0	1	A0A2D3CTA4; A0A2A5IAS5	0	2719.37	80.8	92.6	95.1	106.4	109.3	115.9	26.85	4	6.1394	47.5982
GIEIVSYQGQDNIYSDLTAGR	1xiTRAQ8plex [N-Term]	6.52415e-10	0	4	B5XNT0	0	2603.33	68.2	74.4	72.5	128.8	131.9	124.2	71.76	3	7.79672	44.7394
HHQTYVNNANAALESLPEFANLSAEELITK	3xiTRAQ8plex [N-Term; Y5; K30]; 1xDeamidated [N]	5.50814e-08	0	5	W1DFB0	0	4238.25	141.4	112.4	96.7	93.2	77.9	78.5	24.54	5	5.48094	42.7093
IATVTNFPHGNDDIDIALAETR	1xiTRAQ8plex [N-Term]; 1xDeamidated [N11]	7.87536e-09	0	2	W1DNK1	0	2688.38	99.9	90.7	102.9	99.3	101.6	105.6	55.78	3	0.569016	44.0271
AGYPVVVSAGAGSTATSLSAQNSSSDNGLLTQ	1xiTRAQ8plex [N-Term]; 2xDeamidated [Q21; N22]	0.000350495	0	1	A0A1Y0PYV0	0	3316.63	127.1	86.5	83.5	104.6	98.5	99.9	38.71	3	8.14222	43.9705
WLESSPQETHAEHVVVNGQNYLLEVTPVYLEGEHNER	1xiTRAQ8plex [N-Term]; 3xDeamidated [N/Q]	1.16529e-08	0	6	A0A060VLS7	0	4610.23	115.2	98.5	99.7	93.1	109.4	84.1	34.96	5	12.7331	43.048
DGVIADFFVTEK	2xiTRAQ8plex [N-Term; K12]	2.71318e-06	0	5	W8UBN2	0	1949.08	105.9	103.4	109.8	97.1	93	90.8	45.03	2	-1.47564	43.5283
RVVVTGLGMLSPVGNTVESTWK	2xiTRAQ8plex [N-Term; K22]	0.000161491	0	1	A0A0E1CKI5	1	2938.66	95.7	89.4	95.9	115	102.9	101.1	21.6	4	6.41487	43.4677
FLIVEETINGK	2xiTRAQ8plex [N-Term; K11]; 1xDeamidated [N9]	2.96648e-05	0	5	A0A1Y0Q0E4	0	1872.09	99.7	102.2	103.1	96.9	98.5	99.5	49.26	2	-1.24835	43.4283
QQLIDWMEADK	2xiTRAQ8plex [N-Term; K11]	0.000211674	0	1	A0A1W6ALA0	0	1985.06	38.7	42.8	47.6	160.4	158.3	152.1	39.66	3	-5.57995	43.4046
RYYGGCEYVDVVEQLAIDR	1xiTRAQ8plex [N-Term]; 1xCarbamidomethyl [C6]	1.39777e-08	0	1	W8UE55	1	2609.3	92.6	87.4	95.9	114	109.3	100.8	39.41	3	-2.98021	43.4019
LFGTVQEGALK	2xiTRAQ8plex [N-Term; K11]	1.42542e-06	0	1	A0A081LWM0; W1GBW9	0	1771.06	79.7	85.6	80.6	122.3	117.4	114.3	60.65	3	-3.90764	33.0201
LIALAVAHNLSNDVR	1xiTRAQ8plex [N-Term]; 1xDeamidated [N]	1.83755e-09	0	3	B5XYE3	0	1911.1	91.6	88	90.7	92.1	126.5	111.1	67.1	3	0.563808	39.901
LIALAVAHNLSNDVR	1xiTRAQ8plex [N-Term]	1.83755e-09	0	4	B5XYE3	0	1910.11	93	94.5	93.4	99.9	116.4	102.8	62.46	3	-1.63693	40.0266
AGIGELIDFDVK	2xiTRAQ8plex [N-Term; K12]	2.61582e-05	0	1	A0A164L059; A0A2A5IIU4	0	1885.09	97.5	102.1	107.7	104.8	98.8	89.3	49.74	3	-3.29161	43.3017
SPVNDHPLCLFNPQEDAQILQK	2xiTRAQ8plex [N-Term; K22]; 3xDeamidated [N4; Q14; N/Q]; 1xCarbamidomethyl [C9]	3.84163e-05	0	3	V0AN77	0	3174.62	104.6	107.2	111.5	98	86.9	91.9	28.73	3	10.4705	42.3387
SPVNDHPLCLFNPQEDAQILQK	2xiTRAQ8plex [N-Term; K22]; 2xDeamidated [N/Q]; 1xCarbamidomethyl [C9]	2.32614e-06	0	6	V0AN77	0	3173.64	99.7	100	98.1	95.9	105.9	100.4	43.62	3	13.4762	40.9361
SPVNDHPLCLFNPQEDAQILQK	2xiTRAQ8plex [N-Term; K22]; 1xDeamidated [N/Q]; 1xCarbamidomethyl [C9]	7.2362e-08	0	10	V0AN77	0	3172.66	110.1	102.4	106.8	95.5	93	92.2	60.47	3	-0.484004	43.036
SPVNDHPLCLFNPQEDAQILQK	2xiTRAQ8plex [N-Term; K22]; 1xCarbamidomethyl [C9]	1.30332e-08	0	4	V0AN77	0	3171.67	101.5	103.7	108	99.3	95.8	91.6	43.32	4	2.34272	41.4338
VISQLVPTISGVHDMTETVR	1xiTRAQ8plex [N-Term]	3.9978e-10	0	2	A0A0S3FGP9	0	2486.36	54.8	54.4	55.7	147.3	154.1	133.6	61.18	3	-0.911025	43.2977
VSQTLAAEQSLETLVR	1xiTRAQ8plex [N-Term]	5.58957e-09	0	2	A0A0H3GLM7	0	2049.15	95.8	93.6	98.3	100.7	110.1	101.5	67.1	3	3.2527	43.2606
EGEATLAPSLDLVGKI	2xiTRAQ8plex [N-Term; K15]	2.96648e-05	0	4	A0A0E1CI00	1	2221.29	81.2	86.5	88.1	120.9	113.9	109.5	35.18	4	-1.98313	43.2833
DGYYQQGYPLGDAMGGDGQLFAGK	2xiTRAQ8plex [N-Term; K24]	3.59212e-07	0	2	A0A024GWG5; Q48449	0	3116.52	129.9	143.7	152.9	51.4	66.7	55.3	42.22	3	0.212818	43.2357
AGIVEFAQALSAR	1xiTRAQ8plex [N-Term]	3.77503e-08	0	2	A0A0E1CQK9; W9BD71; A0A2G3RXF5	0	1636.93	100.1	110.2	109.1	95.9	92.5	92.1	86.28	3	-0.508661	43.5941
LIDIATATISR	1xiTRAQ8plex [N-Term]	7.66722e-05	0	1	C8T993	0	1477.89	65.3	70.1	72.6	125.3	122.2	144.5	48.34	3	3.99189	43.1988
LADPTAMVVATVDER	1xiTRAQ8plex [N-Term]	3.5422e-07	0	2	A0A1S8YBV4	0	1892.01	90.7	97.3	96.4	95.1	122.1	98.5	58.63	3	2.45212	42.8061
VALVVGESEIADGNVVVK	2xiTRAQ8plex [N-Term; K18]; 1xDeamidated [N14]	3.38767e-05	0	1	W8UWF2	0	2407.39	80.8	95.9	95.6	107.2	105.7	114.8	44.9	2	3.76787	43.1684
VALVVGESEIADGNVVVK	2xiTRAQ8plex [N-Term; K18]	1.23321e-09	0	7	W8UWF2	0	2406.41	89.9	94.2	94.9	108.5	106.1	106.4	84.62	3	2.85373	43.6829
MIMQVHDELVFEVHKDELNAVSK	3xiTRAQ8plex [N-Term; K15; K23]; 1xDeamidated [N19]	0.000385916	0	1		1	3624.95							10.39	5	-5.2463	43.1579
MIMQVHDELVFEVHKDELDAVSK	3xiTRAQ8plex [N-Term; K15; K23]	0.000385916	0	1	A0A0C7KAU0	1	3624.95	102.7	105.2	109.7	80.7	108.3	93.5	10.39	5	-5.24619	43.1579
IVFEMENVNYQVDGK	2xiTRAQ8plex [N-Term; K15]	1.38609e-06	0	1	A0A0C7KG71	0	2393.26	109.2	104.6	98.9	88	112.2	87.1	46.66	3	1.40855	43.1394
GKYDHHLLEDYTEEEFQQMDGFLDHWR	2xiTRAQ8plex [N-Term; K2]; 2xDeamidated [Q17; Q18]	1.33005e-07	0	1	A0A2G4YLC9; W8UHC2	1	4048.89	90.2	97.4	86.2	119.4	107.2	99.6	33.13	6	9.69807	48.45
GKYDHHLLEDYTEEEFQQMDGFLDHWR	2xiTRAQ8plex [N-Term; K2]; 1xDeamidated [Q]	3.54948e-10	0	5	A0A2G4YLC9; W8UHC2	1	4047.91	91.2	100.1	103.6	96.7	104.6	103.7	36.38	4	4.73305	48.4341
GKYDHHLLEDYTEEEFQQMDGFLDHWR	2xiTRAQ8plex [N-Term; K2]	8.57096e-10	0	2	A0A2G4YLC9; W8UHC2	1	4046.92	88.9	107.4	100.4	107.5	95	100.9	55.08	6	-1.69554	48.3957
LPTPEEYQTFVAQVDK	2xiTRAQ8plex [N-Term; K16]	1.05402e-05	0	9	W9BCI4; A0A231WHP5	0	2473.34	87.8	93.5	96.4	110.5	105.4	106.4	62.58	2	-1.23747	44.1274
ILPLVCYDLR	1xiTRAQ8plex [N-Term]; 1xCarbamidomethyl [C6]	2.30656e-05	0	2	R4Y5Z0	0	1565.9	106.3	105.3	102.1	102.1	92.7	91.5	51.54	3	0.400983	43.503
KIPDFACDVVGLDNAQAATTATEHLVEK	3xiTRAQ8plex [N-Term; K1; K28]; 1xCarbamidomethyl [C7]	1.10032e-06	0	1	A0A1C3PRY9	1	3926.11	107.5	106.4	115.2	89.6	87.6	93.7	20.19	5	-0.352341	43.5718
KIPDFACDVVGLDNAQAATTATEHLVEK	3xiTRAQ8plex [N-Term; K1; K28]; 2xDeamidated [N14; Q16]; 1xCarbamidomethyl [C7]	0.000111702	0	1	A0A1C3PRY9	1	3928.08	92.2	98.3	105.3	94.3	112.7	97.2	34.67	4	6.74853	43.5043
DDQQTITGTLQQLEHLAK	2xiTRAQ8plex [N-Term; K18]	3.01338e-06	0	1	A0A2D2PRS4	0	2647.45	103.3	109.8	102.8	98	88.1	98	20.44	4	-0.00854383	43.9691
DMPFELVEIPAGK	2xiTRAQ8plex [N-Term; K13]	0.000201649	0	2	A0A1C3QD26	0	2054.15	93.6	94	94.2	100.7	110.7	106.8	38.7	4	-0.730716	43.9255
ADLIVADITITPER	1xiTRAQ8plex [N-Term]	1.63037e-08	0	4	A0A0C7KIZ7; A0A2G4PR61	0	1831.05	95.6	99.7	97.2	99.9	100.9	106.7	54.8	3	2.24197	44.2567
NNGTNNFYTANLGNGVVAIGYK	2xiTRAQ8plex [N-Term; K22]; 4xDeamidated [N2; N11; N14; N]	1.31839e-05	0	2	R4YGR5	0	2913.47	99	106.2	99.7	89.6	124.1	81.3	33.99	3	5.13647	44.3662
RPLTFFCYGVGVLEGGELPASHSAR	1xiTRAQ8plex [N-Term]; 1xCarbamidomethyl [C7]	6.64883e-07	0	1	W9BBU9	0	3024.57	81	82.8	91.5	88.6	161.5	94.6	46.27	3	-3.08939	43.8531
VPQTAEELESYYQFR	1xiTRAQ8plex [N-Term]	1.46794e-08	0	2	A0A0H3GK19	0	2164.09	93.7	100.6	99.8	95.9	106.6	103.4	67.17	3	0.404	43.8899
NLVVLVEAVDNDKAALTQASR	2xiTRAQ8plex [N-Term; K13]; 1xDeamidated [N11]	5.70813e-09	0	2	A0A1B2ZW05	1	2835.6	100.1	100.5	98.4	103.2	96.3	101.5	45.4	3	-0.0937096	43.823
NLVVLVEAVDNDKAALTQASR	2xiTRAQ8plex [N-Term; K13]	5.95286e-09	0	3	A0A1B2ZW05	1	2834.62	94.5	101.1	102.6	102.2	98.7	100.8	56.18	2	-2.62724	49.5248
MELIAPAHVDNPFHFSFR	1xiTRAQ8plex [N-Term]	2.51222e-06	0	1	A0A0C7K6B6	0	2432.25	91.7	96.6	105.4	98	110.3	98.1	31.67	4	-2.7993	43.8137
LLGYYTLSGSCFER	1xiTRAQ8plex [N-Term]; 1xCarbamidomethyl [C11]	2.19641e-05	0	2	W8UNY3	0	1970	88.2	95.1	99.8	102	107.6	107.3	45.83	3	-2.13472	43.8557
AIGDAPFLLVTSASHLPR	1xiTRAQ8plex [N-Term]	2.81767e-10	0	1	A0A060VLC5	0	2169.23	76.7	85	87.1	112.6	119.3	119.3	54.12	3	2.83829	43.7966
LHPAHDLAALADADLVIEAASER	1xiTRAQ8plex [N-Term]	3.75126e-09	0	6	B5XRJ5; A0A2D3D1J3; W9B852; A0A2D2EPU4; A0A2D2PWE7; A0A2G4YG91; A0A1B2ZSZ6	0	2702.44	95.8	103.4	103.5	98.5	96	102.8	42.06	4	2.01575	43.8333
IDASTLAELDALR	1xiTRAQ8plex [N-Term]	2.46357e-08	0	4	A0A2G8ABC8	0	1691.95	96.8	95	93.8	103.4	102.8	108.2	73.05	3	-0.181354	43.4123
ILDYIKPDYVHVLYQGR	2xiTRAQ8plex [N-Term; K6]	1.2554e-05	0	2	A0A0H3GU45	0	2700.53	98.6	100.1	97.1	106.9	91.5	105.8	10.7	5	-0.126085	43.7861
IATVTNFPHGNDDIDIALAETR	1xiTRAQ8plex [N-Term]	4.11406e-11	0	4	W1DNK1	0	2687.39	89.8	90.4	89.9	111	108.5	110.3	60.02	2	0.690469	41.2666
ILVGELDDEQMAALSR	1xiTRAQ8plex [N-Term]	2.14187e-08	0	2	J2X024	0	2064.09	133	134.6	136.2	60	71.7	64.5	70.36	3	4.51763	43.7979
IHELEGQMMQHAQNLEFEEAAQIR	1xiTRAQ8plex [N-Term]; 1xDeamidated [N/Q]	9.08293e-13	0	3	A0A1Y0Q646; W8UKW9	0	3157.53	101.3	106.9	90.7	103.8	106	91.4	58.78	3	4.39629	43.7253
IRPGTLAVDALNLMQSR	1xiTRAQ8plex [N-Term]	1.3573e-06	0	1	A0A1B3A5U9	0	2159.23	98.4	91.3	94	98.3	112.9	105.1	28.47	3	-4.88091	43.7135
FDESQFVPTVAGYYTDSK	2xiTRAQ8plex [N-Term; K18]; 1xDeamidated [Q5]	1.32764e-05	0	3	W9BBW5	0	2663.33	105.7	106.3	96.7	88	103.1	100.2	49.9	3	11.3395	43.7095
FDESQFVPTVAGYYTDSK	2xiTRAQ8plex [N-Term; K18]	8.2074e-08	0	7	W9BBW5	0	2662.35	104.2	108.3	108.7	96.5	93.4	89	56.82	3	-1.721	44.2909
LNLLADDTLADRVDEIQER	1xiTRAQ8plex [N-Term]	8.98892e-08	0	3	A0A1L5ULB0	1	2503.33	100.4	101.4	101.5	94.8	106.6	95.4	39.73	3	2.07812	44.2186
LYAASSSGVPVNLLIR	1xiTRAQ8plex [N-Term]	1.44754e-08	0	4	A0A060VQX6	0	1964.15	94.5	97.7	94.8	106.1	105.5	101.5	47.46	3	0.453318	43.3514
VFVDAGVKGEDYDAAWNSFVVK	3xiTRAQ8plex [N-Term; K8; K22]; 1xDeamidated [N17]	3.58931e-06	0	2	W9BJT0; W1HQX7	1	3329.78	86	87.5	90.3	108	116.6	111.5	23.08	5	5.82981	45.6279
VFVDAGVKGEDYDAAWNSFVVK	3xiTRAQ8plex [N-Term; K8; K22]	0.000132929	0	1	W9BJT0; W1HQX7	1	3328.8	77.9	84.4	93.7	127.8	78.4	137.7	15.53	5	-2.74731	46.1471
YSSVWFDSNDYYITPGNGDDSGNASYHK	2xiTRAQ8plex [N-Term; K28]; 3xDeamidated [N9; N17; N23]	1.42645e-07	0	1		0	3770.69							32.55	4	7.7752	43.6551
YSSVWFDSNDYYITPGNGDDSGDASYHK	2xiTRAQ8plex [N-Term; K28]; 2xDeamidated [N9; N17]	1.42645e-07	0	1	A0A060VHK0	0	3770.69	69.5	93.1	104.1	99.9	79.5	153.9	32.55	4	7.77531	43.6551
VQLVETVIKPALAR	2xiTRAQ8plex [N-Term; K9]	2.3886e-05	0	3	W9B6J4	0	2145.36	96.9	102.1	99.9	100.7	97.8	102.6	28.46	3	-0.83694	44.0984
ESIQYCNQTIASAMTMDKDF	2xiTRAQ8plex [N-Term; K18]; 1xCarbamidomethyl [C6]	3.72e-07	0	2	W8V0S8; A0A1V6XP07	1	2961.43	104.7	101	100.5	97.7	100.5	95.6	50.69	3	0.656419	43.6125
CDCGFQLEAALSHIAEEGR	1xiTRAQ8plex [N-Term]; 2xCarbamidomethyl [C1; C3]	3.48049e-12	0	1	A0A1B2ZMK3	0	2467.16	83.2	87.2	85.8	111	117.8	115.1	66.43	3	0.958325	43.5928
RQTLLAQMQPGSAALIFAAPEAVR	1xiTRAQ8plex [N-Term]	4.46217e-07	0	1	A0A2G8AJ15	1	2843.59	104.4	97.1	89.9	93.4	107.7	107.6	50.38	4	3.90418	43.5401
FIEQDPEGQYGLEAAFR	1xiTRAQ8plex [N-Term]	1.84792e-07	0	7	A0A0H3GPZ9; A0A2G3RXD6	0	2274.13	102.2	96.9	93.3	101.6	108	98.1	61.75	3	1.11872	43.7478
DGVLTQWLLTNYSAR	1xiTRAQ8plex [N-Term]	9.72131e-10	0	2	A0A0E1CKI8	0	2041.1	66.5	72	74.6	124.4	132.9	129.6	74.07	3	-0.0332379	49.2629
HHQTYVNNANAALESLPEFANLSAEELITK	3xiTRAQ8plex [N-Term; Y5; K30]; 2xDeamidated [N/Q]	6.07499e-08	0	7	W1DFB0	0	4239.23	131.3	109.1	98.9	95.5	94.5	70.7	48.85	3	6.47775	42.4186
EQLLEVGDFLK	2xiTRAQ8plex [N-Term; K11]	2.71523e-07	0	3	A0A2G8AL55; W1E7P4	0	1899.1	90.5	94.1	89.6	112.1	110.5	103.3	40.04	2	-6.00524	44.375
[truncated: 43,061 more rows]

## Sheet: S3 file
Supplementary file 3_protein quantify and difference analysis
[truncated: 4,340 more rows]

## Sheet: S4_file(1)
Supplementary file 4_The functional terms of all differentially expressed proteins in each category
[truncated: 1,139 more rows]

[truncated: 2 more sheets: S4_file(2), S4_file(3)]
